# Supplementary material
Source: Research Square preprint supplement (doi:10.21203/rs.3.rs-9902246/v1)
Supplement: Supplementary file 1 [file cde7dec551575794870dec18.xlsx]

## Sheet: Table S1
Table S1. List of databases accessed and web servers used for analysis
S. No.	Web server/ tool	Query/ dataset	Accessed on	Link
1	NCBI Genome Database	Oryza sativa	January, 2023	https://www.ncbi.nlm.nih.gov/datasets/genome/?taxon=39946
2	Rice Genome Hub	Oryza sativa	January, 2023	https://rice-genome-hub.southgreen.fr/
3	Core Hunter	NA	March, 2024	https://www.corehunter.org
4	SNP-Seek	3KRG	March, 2024	snp-seek.irri.org
5	AlphaFold server	NA	March, 2026	https://alphafoldserver.com
6	MAFFT online server (version 7)	NA	September, 2024	https://mafft.cbrc.jp/alignment/server/index.html
7	SNP-Seek	Chr5:18810400-18817700	September, 2025	snp-seek.irri.org
8	Rice Annotation Project Database (RapDb)	IRGSP1.0	December, 2025, May 2026	https://rapdb.dna.naro.go.jp/
9	European Nucleotide Archive (ENA)	PRJEB6180	NA	www.ebi.ac.uk/ena
10	FAOSTAT 2023			https://www.fao.org/faostat/en/#home
11	Gene Expression Omnibus Database	NA	NA	https://www.ncbi.nlm.nih.gov/geo/
12	miRbase	NGR5 sequence	May, 2026	https://www.mirbase.org/
13	psRNATarget with Schema v2	NGR5 sequence	May, 2026	https://www.zhaolab.org/psRNATarget/analysis

## Sheet: Table S2
Table S2. Representative rice genotypes grown under different nitrogen regiems used for NGR5 expression analysis
Description: Rice genotypes representing different NGR5 haplotypes (given in the Table S2.1) were grown hydroponically using modified Yoshida nutrient solution (Table S2.2). Macronutrient and micronutrient stock solutions were prepared according to the standard Yoshida formulation [Chapter 17: Routine procedure for growing rice plants, Tables 1 and 2 from Yoshida et al. 1971], and 5 mL of each st…
Table S2.1 List of genotypes used for qPCR				Table S2.2 Yoshida media composition used for growing rice plants in this study
S. No.	Genotype IRIS ID	Haplotype		Component	Stock preparation (1 L stock)	Volume added to 4 L medium	Final concentration in N100	Final concentration in N50	Final concentration in N0
1	IRIS 313-10848	HAP1a		NH₄NO₃	91.4 g L⁻¹	5 mL	1.43 mM	0.715 mM	0 mM
2	IRIS 313-11156	HAP1a		NaH₂PO₄·2H₂O	40.3 g L⁻¹	5 mL	0.37 mM	0.37 mM	0.37 mM
3	NIPPONBARE	HAP1a		K₂SO₄	71.4 g L⁻¹	5 mL	0.51 mM	0.51 mM	0.51 mM
4	IRIS 313-11375	HAP1b		CaCl₂	88.6 g L⁻¹	5 mL	1.0 mM	1.0 mM	1.0 mM
5	IRIS 313-11627	HAP1b		MgSO₄·7H₂O	324 g L⁻¹	5 mL	1.64 mM	1.64 mM	1.64 mM
6	IRIS 313-11259	HAP1b		Micronutrient stock	Standard Yoshida formulation	5 mL	Standard	Standard	Standard
7	ISM	HAP2		Fe-EDDHA (6% Fe)	60 g L⁻¹	1 mL L⁻¹	Supplemented	Supplemented	Supplemented
8	SM	HAP2		MES buffer	Direct addition	0.5 g L⁻¹	2.5 mM	2.5 mM	2.5 mM
9	IRIS 313-11515	HAP2		Final pH	—	—	5.5	5.5	5.5
10	IRIS 313-8559	HAP2
11	IRIS 313-11801	HAP2
12	CX230	HAP3a
13	CX403	HAP3a
14	IRIS 313-9351	HAP3a
15	IRIS 313-10272	HAP3b
16	IRIS 313-11228	HAP3b
17	IRIS 313-11410	HAP3b
18	IRIS 313-11212	HAP3b
19	IRIS 313-11126	HAP4a
20	IRIS 313-10682	HAP4a
21	IRIS 313-11710	HAP4a
22	CX94	HAP4b
23	IRIS 313-11948	HAP4b
24	IRIS 313-10349	HAP4b
25	Tetep	HAP4b
26	IRIS 313-11917	HAP4c
27	IRIS 313-11413	HAP4c
28	IRIS 313-10849	HAP4c
29	B115	HAP5a
30	B242	HAP5a
31	IRIS 313-10263	HAP5a
32	IRIS 313-11453	HAP5b
33	IRIS 313-11354	HAP5b

## Sheet: Table S3
Table S3: List of 20% diverse accessions identified as coreset, and the accession numbers of the WGS data.
S. No	IRIS ID	Description	IRGC ID	Sub-population	ENA/SRA ID
1	IRIS 313-10849	ARC 7001::IRGC 20436-1::[IRIS 313-10849]	IRGC 127166	aus	ERS469651
2	IRIS 313-10873	ARC 11822::IRGC 21677-1::[IRIS 313-10873]	IRGC 127140	aus	ERS469677
3	IRIS 313-10875	ARC 12021::IRGC 21837-1::[IRIS 313-10875]	IRGC 127141	aus	ERS469679
4	IRIS 313-10927	SUGA PANKHA::IRGC 24054-1::[IRIS 313-10927]	IRGC 127828	aus	ERS469726
5	IRIS 313-10969	INDIA DULAR (NO ORDEM 7)::IRGC 26070-1::[IRIS 313-10969]	IRGC 127430	aus	ERS469771
6	IRIS 313-11111	SAITA::IRGC 31618-1::[IRIS 313-11111]	IRGC 127778	aus	ERS469908
7	IRIS 313-11169	KANAI BASHI::IRGC 34967-1::[IRIS 313-11169]	IRGC 131997	aus	ERS469972
8	IRIS 313-11171	M 142::IRGC 35054-1::[IRIS 313-11171]	IRGC 127583	aus	ERS469974
9	IRIS 313-11172	RANI BHOG::IRGC 35109-1::[IRIS 313-11172]	IRGC 127762	aus	ERS469975
10	IRIS 313-11629	LATIJHABAR::IRGC 61991-1::[IRIS 313-11629]	IRGC 127554	aus	ERS468808
11	IRIS 313-11712	GORA DHAN 2::IRGC 66269-1::[IRIS 313-11712]	IRGC 127389	aus	ERS468876
12	IRIS 313-11917	BUTNAPAR::IRGC 74734-1::[IRIS 313-11917]	IRGC 127241	aus	ERS469061
13	IRIS 313-9091	SINNA SITHIRA KALI::IRGC 51064-1::[IRIS 313-9091]	IRGC 124442	indx	ERS468218
14	IRIS 313-10235	PSBRC 68::IRGC 99711-1::[IRIS 313-10235]	IRGC 125874	indx	ERS468179
15	IRIS 313-11594	CHAN THANH HOA::IRGC 60647-1::[IRIS 313-11594]	IRGC 127259	indx	ERS468781
16	IRIS 313-11930	ITA 117::IRGC 75235-1::[IRIS 313-11930]	IRGC 127444	ind1B	ERS469075
17	CX233	IR58821-23-1-3-1::[CX233]	IRGC 135926	indx	ERS470557
18	CX238	BW311-9::[CX238]	IRGC 135854	ind1B	ERS470562
19	CX250	829::[CX250]	IRGC 135820	ind1B	ERS470572
20	IRIS 313-11751	L 10833::IRGC 68121-1::[IRIS 313-11751]	IRGC 127539	indx	ERS468914
21	CX124	IR71466-75-3-B-1::[CX124]	IRGC 135936	indx	ERS470490
22	CX144	HTA7204::[CX144]	IRGC 135906	indx	ERS470508
23	CX366	GANWANXIAN 37 (926)::[CX366]		indx	ERS470651
24	IRIS 313-8458	ARC 18175::IRGC 42316-1::[IRIS 313-8458]	IRGC 131928	indx	ERS467945
25	IRIS 313-8967	ARC 12576::IRGC 22163-1::[IRIS 313-8967]	IRGC 125645	indx	ERS468001
26	IRIS 313-10134	PIN GAEW 56::IRGC 7887-1::[IRIS 313-10134]	IRGC 125871	ind3	ERS468158
27	IRIS 313-10402	IRGA 411-1-6-1F-A::IRGC 117344-1::[IRIS 313-10402]	IRGC 125990	ind1B	ERS468205
28	IRIS 313-10371	IR 67518-B-11-1-B::IRGC 117380-1::[IRIS 313-10371]	IRGC 126026	indx	ERS468234
29	IRIS 313-11656	B 3913 B 16-20 ST 28::IRGC 63099-1::[IRIS 313-11656]	IRGC 127196	indx	ERS468833
30	IRIS 313-11714	CHAMPION::IRGC 66327-1::[IRIS 313-11714]	IRGC 127256	indx	ERS468878
31	IRIS 313-11886	IR 4683-54-2::IRGC 72992-1::[IRIS 313-11886]	IRGC 127439	ind1B	ERS469046
32	IRIS 313-11889	MURGI BRINJ::IRGC 73109-1::[IRIS 313-11889]	IRGC 127639	indx	ERS469078
33	IRIS 313-11977	MAMORIAKA::IRGC 77867-1::[IRIS 313-11977]	IRGC 127601	indx	ERS469123
34	IRIS 313-12182	NYAULI::IRGC 88628-1::[IRIS 313-12182]	IRGC 127686	indx	ERS469247
35	IRIS 313-12246	BANGKOUY::IRGC 94037-1::[IRIS 313-12246]	IRGC 127208	ind3	ERS469278
36	IRIS 313-12354	NASAENG::IRGC 107818-1::[IRIS 313-12354]	IRGC 127649	indx	ERS469354
37	IRIS 313-10820	TJERE MANGGA::IRGC 19116-2::[IRIS 313-10820]	IRGC 128189	ind3	ERS469623
38	IRIS 313-10903	KHSAY VENG::IRGC 22915-1::[IRIS 313-10903]	IRGC 135762	ind3	ERS469701
39	IRIS 313-11079	PHAN PHAE::IRGC 29652-2::[IRIS 313-11079]	IRGC 128132	ind3	ERS469882
40	IRIS 313-11243	RATNAGIRI 45-2::IRGC 39709-1::[IRIS 313-11243]	IRGC 127765	admix	ERS470037
41	B115	AIMAKANG::[B115]		ind1A	ERS470325
42	B123	ZAOSHUXIANGHEIMI::[B123]		indx	ERS470333
43	B219	HAOLAI::[B219]		indx	ERS470420
44	CX225	IR77298-14-1-2::[CX225]	IRGC 135938	ind1B	ERS470549
45	CX358	PSBRC82::[CX358]	IRGC 136024	ind1B	ERS470643
46	CX385	NPT-100::[CX385]	IRGC 136011	ind1B	ERS470671
47	CX96	AJAYA::[CX96]	IRGC 135824	ind1B	ERS470749
48	IRIS 313-11006	PULU RENNI::IRGC 27386-1::[IRIS 313-11006]	IRGC 127747	ind3	ERS469802
49	B058	ERJIUNAN 1::[B058]		ind1B	ERS470272
50	B108	XIANGGU::[B108]		indx	ERS470318
51	IRIS 313-8457	SARA::IRGC 66631-1::[IRIS 313-8457]		ind3	ERS468243
52	IRIS 313-11808	R 762::IRGC 70531-1::[IRIS 313-11808]	IRGC 128444	indx	ERS468957
53	IRIS 313-10804	PUAK::IRGC 18512-1::[IRIS 313-10804]	IRGC 135787	ind3	ERS469643
54	IRIS 313-10944	SIPULUT SUBANG::IRGC 24824-2::[IRIS 313-10944]	IRGC 132269	ind3	ERS469744
55	IRIS 313-11261	ARC 13785::IRGC 41218-2::[IRIS 313-11261]	IRGC 127951	indx	ERS470056
56	B227	MENJIAGAO 1::[B227]		indx	ERS470427
57	CX44	IR58025B::[CX44]	IRGC 135925	ind1B	ERS470693
58	IRIS 313-10585	UKON NISHIKI::IRGC 8314-1::[IRIS 313-10585]	IRGC 128494	admix	ERS469442
59	B031	NGATSIN::[B031]	IRGC 136007	ind2	ERS470248
60	CX270	TAICHUNGNATIVE1::[CX270]		ind1A	ERS470583
61	IRIS 313-11838	LEUM DERN::IRGC 71288-1::[IRIS 313-11838]	IRGC 132389	ind3	ERS468990
62	IRIS 313-12194	EA POUAK::IRGC 89748-1::[IRIS 313-12194]	IRGC 127353	ind3	ERS469255
63	CX379	NIONOKA::[CX379]	IRGC 136008	ind1B	ERS470665
64	CX2	BR11::[CX2]	IRGC 135847	indx	ERS470533
65	IRIS 313-11525	DIAMBARANG::IRGC 56726-1::[IRIS 313-11525]	IRGC 127319	ind3	ERS468726
66	IRIS 313-10178	GAO JIAO BAI::IRGC 68047-1::[IRIS 313-10178]	IRGC 125748	ind1A	ERS468169
67	IRIS 313-10504	HSIEH DAU::IRGC 4727-1::[IRIS 313-10504]	IRGC 127419	ind1A	ERS469381
68	IRIS 313-12263	KHIE TOM::IRGC 95601-1::[IRIS 313-12263]	IRGC 127521	ind3	ERS469321
69	IRIS 313-11414	KARUNJEERAGA SAMBA::IRGC 49774-1::[IRIS 313-11414]	IRGC 127495	indx	ERS470205
70	IRIS 313-11515	BKN BR 1031-78-5-4::IRGC 55927-1::[IRIS 313-11515]	IRGC 127231	indx	ERS468740
71	B090	ZIMI::[B090]		indx	ERS470302
72	IRIS 313-15898	IR 4630-22-2-5-1-3::G1::[IRIS 313-15898]	IRGC 126962	indx	ERS467755
73	IRIS 313-11853	BU ZHI MING::IRGC 71971-1::[IRIS 313-11853]	IRGC 127242	ind1A	ERS469006
74	IRIS 313-9492	NCS 237::IRGC 62202-1::[IRIS 313-9492]	IRGC 125853	ind2	ERS467879
75	IRIS 313-10300	CT 9506-18-7-1T-2::IRGC 116973-1::[IRIS 313-10300]	IRGC 125960	indx	ERS467916
76	IRIS 313-10404	K 479-2-3::IRGC 117346-1::[IRIS 313-10404]	IRGC 121003	indx	ERS467927
77	IRIS 313-8559	KEERIPALA CHILL PADDY::IRGC 49790-1::[IRIS 313-8559]	IRGC 125615	ind2	ERS467951
78	IRIS 313-8704	ROPA::IRGC 74774-1::[IRIS 313-8704]		ind2	ERS467966
79	IRIS 313-8844	ARC 14060::IRGC 41374-1::[IRIS 313-8844]	IRGC 125648	ind2	ERS467978
80	IRIS 313-8994	ARC 14064::IRGC 41377-1::[IRIS 313-8994]	IRGC 125649	indx	ERS468008
81	IRIS 313-9066	AUS 177::IRGC 29009-1::[IRIS 313-9066]	IRGC 125659	ind1B	ERS468017
82	IRIS 313-9067	BHOJON KOLPO::IRGC 31727-1::[IRIS 313-9067]	IRGC 125681	ind2	ERS468018
83	IRIS 313-9258	MAKRO::IRGC 74763-1::[IRIS 313-9258]	IRGC 126158	ind2	ERS468046
84	IRIS 313-9317	VEN THAP::IRGC 56138-1::[IRIS 313-9317]	IRGC 125933	indx	ERS468056
85	IRIS 313-9484	CHNNOR::IRGC 67485-1::[IRIS 313-9484]	IRGC 125706	indx	ERS468075
86	IRIS 313-9791	LEAD::IRGC 5805-1::[IRIS 313-9791]	IRGC 125821	indx	ERS468116
87	IRIS 313-10026	KITRANA 1007::IRGC 68517-1::[IRIS 313-10026]	IRGC 125804	ind2	ERS468144
88	IRIS 313-10050	TSIMATAHOPAOSA::IRGC 69884-1::[IRIS 313-10050]	IRGC 127091	indx	ERS468152
89	IRIS 313-10271	IA CUBA 17::IRGC 116990-1::[IRIS 313-10271]	IRGC 125966	indx	ERS468186
90	IRIS 313-9409	GUMPANGAR::IRGC 71524-1::[IRIS 313-9409]	IRGC 131937	ind3	ERS468225
91	IRIS 313-10360	IR 57514-PMI 5-B-1-2::IRGC 117372-1::[IRIS 313-10360]	IRGC 126025	indx	ERS468233
92	IRIS 313-11925	SAWK GAM MAH::IRGC 75159-1::[IRIS 313-11925]	IRGC 132415	ind3	ERS469070
93	IRIS 313-8703	DA 7::[IRIS 313-8703]	IRGC 124432	ind2	ERS468256
94	IRIS 313-9619	ARC 15845::IRGC 42151-1::[IRIS 313-9619]		indx	ERS468291
95	IRIS 313-7668	DANAU LAUT TAWAR::C1::[IRIS 313-7668]	IRGC 122029	indx	ERS468553
96	IRIS 313-11432	ISWAR KORA::IRGC 50674-1::[IRIS 313-11432]	IRGC 127443	admix	ERS468649
97	IRIS 313-8215	MERLE::GERVEX 1685-C1::[IRIS 313-8215]	IRGC 122168	indx	ERS468656
98	IRIS 313-11467	MACAPAGAL::IRGC 52927-1::[IRIS 313-11467]	IRGC 128372	ind3	ERS468681
99	IRIS 313-11493	AR 133::IRGC 53942-1::[IRIS 313-11493]	IRGC 127126	indx	ERS468704
100	IRIS 313-11528	ZO::IRGC 56914-1::[IRIS 313-11528]	IRGC 127917	ind3	ERS468729
101	IRIS 313-11591	PULUT MERAH 2::IRGC 60427-1::[IRIS 313-11591]	IRGC 132293	admix	ERS468780
102	IRIS 313-11606	BOKDEL::IRGC 61085-1::[IRIS 313-11606]	IRGC 127233	ind2	ERS468792
103	IRIS 313-11615	MANARE (PHOM)::IRGC 61437-1::[IRIS 313-11615]	IRGC 132408	ind3	ERS468793
104	IRIS 313-11669	F 478::IRGC 63882-1::[IRIS 313-11669]	IRGC 131986	indx	ERS468846
105	IRIS 313-11710	LEUANG MAI::IRGC 66019-2::[IRIS 313-11710]	IRGC 134992	ind3	ERS468874
106	IRIS 313-11731	QING TAI AI::IRGC 67273-1::[IRIS 313-11731]	IRGC 127754	indx	ERS468894
107	IRIS 313-11773	AUS 78-125::IRGC 69464-1::[IRIS 313-11773]	IRGC 132275	ind3	ERS468934
108	IRIS 313-11787	TANDAKAY FINGO::IRGC 69793-1::[IRIS 313-11787]	IRGC 127845	ind2	ERS468943
109	IRIS 313-11801	FAN WU::IRGC 70245-1::[IRIS 313-11801]	IRGC 127368	indx	ERS468950
110	IRIS 313-11844	PUEY TAW::IRGC 71405-1::[IRIS 313-11844]	IRGC 127745	ind3	ERS468997
111	IRIS 313-11938	GNASSOUMADOUGOU::IRGC 75595-1::[IRIS 313-11938]	IRGC 131988	indx	ERS469083
112	IRIS 313-12016	EX AUBERGE::IRGC 79898-1::[IRIS 313-12016]	IRGC 135751	indx	ERS469154
113	IRIS 313-12036	CHAN LEUY::IRGC 81223-1::[IRIS 313-12036]	IRGC 132277	ind3	ERS469167
114	IRIS 313-12044	SAR SIEM::IRGC 81386-2::[IRIS 313-12044]	IRGC 135641	ind3	ERS469176
115	IRIS 313-12052	ADUKKAN::IRGC 81783-1::[IRIS 313-12052]	IRGC 127109	indx	ERS469185
116	IRIS 313-12067	531::IRGC 82643-1::[IRIS 313-12067]	IRGC 127100	indx	ERS469198
117	IRIS 313-12121	CHA LIENG::IRGC 84920-1::[IRIS 313-12121]	IRGC 127254	ind3	ERS469219
118	IRIS 313-12297	LOUK PASOM::IRGC 98136-1::[IRIS 313-12297]	IRGC 127576	indx	ERS469312
119	IRIS 313-12300	NGAM KON DAM::IRGC 98486-1::[IRIS 313-12300]	IRGC 127673	indx	ERS469315
120	IRIS 313-12301	LG 10178::IRGC 98526-1::[IRIS 313-12301]	IRGC 127556	indx	ERS469316
121	IRIS 313-10477	RUSTY LATE::IRGC 3506-1::[IRIS 313-10477]	IRGC 128454	indx	ERS469372
122	IRIS 313-10503	HA GOO::IRGC 4577-1::[IRIS 313-10503]	IRGC 127398	ind1A	ERS469380
123	IRIS 313-10522	SUKAMANDI 1005::IRGC 6065-1::[IRIS 313-10522]		admix	ERS469407
124	IRIS 313-10550	221 BC 4-1-45-10::IRGC 6865-1::[IRIS 313-10550]	IRGC 135561	indx	ERS469409
125	IRIS 313-10576	BAANYALOJOPOIHUN::IRGC 7928-2::[IRIS 313-10576]	IRGC 127979	ind2	ERS469434
126	IRIS 313-10661	SAMBA::IRGC 11993-1::[IRIS 313-10661]	IRGC 127781	ind2	ERS469481
127	IRIS 313-10682	PA KHENG::IRGC 12996-1::[IRIS 313-10682]	IRGC 127707	ind3	ERS469500
128	IRIS 313-10733	MOTANGE PAHELLO LAULE::IRGC 16160-1::[IRIS 313-10733]	IRGC 127634	indx	ERS469540
129	IRIS 313-10753	ZACATEPEC::IRGC 16901-2::[IRIS 313-10753]	IRGC 128205	ind1B	ERS469562
130	IRIS 313-10762	BANDI::IRGC 17214-1::[IRIS 313-10762]	IRGC 127207	ind3	ERS469572
131	IRIS 313-10791	MANGSUR::IRGC 18187-1::[IRIS 313-10791]	IRGC 127602	ind3	ERS469600
132	IRIS 313-10810	SEGON BENGGALA::IRGC 18724-1::[IRIS 313-10810]	IRGC 135793	ind3	ERS469612
133	IRIS 313-11181	TAMBA PERAK::IRGC 35534-2::[IRIS 313-11181]	IRGC 128179	ind3	ERS470057
134	IRIS 313-10897	ARC 13373::IRGC 22691-1::[IRIS 313-10897]	IRGC 128227	ind3	ERS469732
135	IRIS 313-10943	PADI BENOT::IRGC 24757-2::[IRIS 313-10943]	IRGC 135631	ind3	ERS469743
136	IRIS 313-10902	KAMPING POUY::IRGC 22876-2::[IRIS 313-10902]		ind3	ERS469786
137	IRIS 313-10996	BAKASI::IRGC 27074-1::[IRIS 313-10996]	IRGC 127204	indx	ERS469792
138	IRIS 313-11034	SANTHI 206::IRGC 28215-1::[IRIS 313-11034]	IRGC 127786	aus	ERS469832
139	IRIS 313-11099	PECALO::IRGC 30595-2::[IRIS 313-11099]		ind2	ERS469895
140	IRIS 313-11132	KALALAN::IRGC 33154-2::[IRIS 313-11132]	IRGC 128065	indx	ERS469931
141	IRIS 313-11135	MAUNG NYO::IRGC 33351-2::[IRIS 313-11135]	IRGC 128108	ind3	ERS469934
142	IRIS 313-11085	KHAO HAE::IRGC 29773-3::[IRIS 313-11085]	IRGC 132273	indx	ERS469938
143	IRIS 313-11167	DUBRAJ::IRGC 34904-1::[IRIS 313-11167]	IRGC 127343	ind2	ERS469969
144	IRIS 313-11192	BKN 7130-1017-2::IRGC 36531-2::[IRIS 313-11192]	IRGC 127997	ind3	ERS469982
145	IRIS 313-11196	DICULA::IRGC 36729-2::[IRIS 313-11196]	IRGC 132333	ind3	ERS469986
146	IRIS 313-11240	CR 157-392-4::IRGC 39247-2::[IRIS 313-11240]	IRGC 128020	indx	ERS470033
147	IRIS 313-11241	BR 116-3B-53::IRGC 39559-2::[IRIS 313-11241]	IRGC 128001	ind2	ERS470034
148	IRIS 313-11275	ARC 14975::IRGC 41848-1::[IRIS 313-11275]	IRGC 127156	indx	ERS470063
149	IRIS 313-11286	ARC 18325::IRGC 42399-1::[IRIS 313-11286]	IRGC 135736	indx	ERS470075
150	IRIS 313-11292	ARC 10120::IRGC 42557-2::[IRIS 313-11292]	IRGC 127929	indx	ERS470081
151	IRIS 313-11295	ARC 11397::IRGC 42664-1::[IRIS 313-11295]	IRGC 127137	admix	ERS470085
152	IRIS 313-11271	ARC 14737::IRGC 41729-2::[IRIS 313-11271]	IRGC 127961	ind2	ERS470117
153	IRIS 313-11403	AEB 368 RIP P TYPE ADT::IRGC 49359-2::[IRIS 313-11403]	IRGC 127923	indx	ERS470195
154	B009	VIETNAM ZAODAO::[B009]	IRGC 136065	ind1A	ERS470227
155	B024	XIANLUOSICHI::[B024]	IRGC 136076	ind1A	ERS470241
156	B026	PADI LADANG ASE POLO KOMEK::[B026]	IRGC 136017	indx	ERS470243
157	B076	MINBEIWANXIAN::[B076]		indx	ERS470290
158	B091	XIAOHONGGU::[B091]		indx	ERS470303
159	B128	SIBEITIZHAO 6::[B128]		indx	ERS470338
160	B140	PEI C122::[B140]		ind1A	ERS470350
161	B151	JINNANTE 43B::[B151]		ind1A	ERS470361
162	B156	G ZHENSHAN 97B::[B156]		ind1A	ERS470366
163	B229	MENJIADING 2::[B229]		indx	ERS470429
164	B254	JINGHU3 B::[B254]		indx	ERS470451
165	B261	MEIHUANUO::[B261]		ind1A	ERS470456
166	B265	WUKEZHAN::[B265]		indx	ERS470459
167	CX147	SEBERANG::[CX147]		indx	ERS470511
168	CX182	SLG1::[CX182]	IRGC 136047	indx	ERS470531
169	CX234	IR62266-42-6-2::[CX234]	IRGC 135928	indx	ERS470558
170	CX27	KHAZAR::[CX27]	IRGC 135969	indx	ERS470582
171	CX340	HUA 564::[CX340]	IRGC 135907	ind1B	ERS470624
172	CX364	42686::[CX364]		ind1B	ERS470649
173	CX54	LINYITANGDAO::[CX54]		indx	ERS470705
174	CX68	MR106::[CX68]	IRGC 135989	indx	ERS470721
175	CX80	OM1706::[CX80]	IRGC 136014	ind1B	ERS470734
176	CX89	M202::[CX89]	IRGC 135977	indx	ERS470742
177	CX93	TGMS29::[CX93]	IRGC 136054	indx	ERS470747
178	CX98	DODDABYRANELLA::[CX98]	IRGC 135882	ind2	ERS470751
179	IRIS 313-9522	RPW 9-4 (SS 1)::IRGC 50690-1::[IRIS 313-9522]	IRGC 126084	indx	ERS468079
180	IRIS 313-11442	ARC 18502::IRGC 51749-2::[IRIS 313-11442]	IRGC 132321	indx	ERS468659
181	IRIS 313-11947	BIE LEI::IRGC 76478-1::[IRIS 313-11947]	IRGC 127226	indx	ERS469092
182	IRIS 313-11228	SADAJIRA 19-339::IRGC 38361-2::[IRIS 313-11228]	IRGC 128155	ind2	ERS470020
183	IRIS 313-11256	ARC 12411::IRGC 41047-2::[IRIS 313-11256]	IRGC 127941	indx	ERS470051
184	B125	XIANGWANXIAN 3::[B125]		indx	ERS470335
185	CX263	PADISENEMOK::[CX263]	IRGC 136018	indx	ERS470576
186	IRIS 313-9809	NALUMOOLAI KARUPAN::IRGC 8993-1::[IRIS 313-9809]		ind3	ERS467828
187	IRIS 313-8392	IR 2003-P7-7-4-2::IRGC 32671-1::[IRIS 313-8392]	IRGC 125970	ind1B	ERS467937
188	IRIS 313-8850	ASHMBER::IRGC 27522-1::[IRIS 313-8850]	IRGC 125657	ind2	ERS467980
189	IRIS 313-9139	GOJOL GORIA::IRGC 26629-1::[IRIS 313-9139]	IRGC 125754	ind2	ERS468029
190	IRIS 313-9503	BINUHANGIN::IRGC 67429-1::[IRIS 313-9503]	IRGC 125683	indx	ERS468076
191	IRIS 313-9604	RPA 5929 (K 45)::IRGC 33963-1::[IRIS 313-9604]	IRGC 125890	indx	ERS468095
192	IRIS 313-9898	QUERO ASSAN::IRGC 28860-1::[IRIS 313-9898]	IRGC 125880	ind3	ERS468124
193	IRIS 313-9687	PA KABAKIE::IRGC 58541-1::[IRIS 313-9687]		indx	ERS468227
194	IRIS 313-11548	TAUNG LWIN::IRGC 58222-1::[IRIS 313-11548]	IRGC 127850	indx	ERS468747
195	IRIS 313-11585	ACC 1286::IRGC 60116-1::[IRIS 313-11585]	IRGC 127104	ind1A	ERS468777
196	IRIS 313-11599	JUGRAY::IRGC 60960-1::[IRIS 313-11599]	IRGC 127468	ind2	ERS468786
197	IRIS 313-12207	SALA::IRGC 90457-1::[IRIS 313-12207]	IRGC 128456	indx	ERS469257
198	IRIS 313-10750	TRANG LUA::IRGC 16781-1::[IRIS 313-10750]	IRGC 135804	ind3	ERS469559
199	IRIS 313-11204	KARTIKHAMA::IRGC 37149-2::[IRIS 313-11204]	IRGC 128072	indx	ERS469995
200	IRIS 313-11306	ARC 15385::IRGC 43174-1::[IRIS 313-11306]	IRGC 127159	indx	ERS470097
201	IRIS 313-11344	SAMON::IRGC 44735-2::[IRIS 313-11344]	IRGC 128157	ind3	ERS470136
202	B012	2037(RAJAHAMSAL)::[B012]	IRGC 135815	ind2	ERS470230
203	B180	P1790-5-1M-4-5M-1B-3M-B::[B180]	IRGC 136016	indx	ERS470385
204	CX314	117::[CX314]	IRGC 135813	ind1B	ERS470612
205	CX388	KR200::[CX388]	IRGC 135972	ind1B	ERS470674
206	IRIS 313-10727	KOUPENEDOU KOUBOURY::IRGC 16011-1::[IRIS 313-10727]		ind3	ERS469534
207	B013	SRI LANKA 1::[B013]	IRGC 136049	indx	ERS470231
208	CX25	CISANGGARUNG::[CX25]	IRGC 135867	ind1B	ERS470571
209	CX341	HUA 565::[CX341]	IRGC 135908	indx	ERS470625
210	IRIS 313-10002	BW 295-5::IRGC 63098-1::[IRIS 313-10002]	IRGC 125955	ind1B	ERS467881
211	IRIS 313-8414	ARC 18202::IRGC 42328-1::[IRIS 313-8414]	IRGC 126175	indx	ERS468209
212	IRIS 313-9582	SADOK::IRGC 13334-1::[IRIS 313-9582]	IRGC 131917	ind3	ERS468226
213	IRIS 313-9310	PUTEH KACA::IRGC 66614-1::[IRIS 313-9310]	IRGC 131946	ind3	ERS468284
214	IRIS 313-8987	SERIBU::IRGC 71615-1::[IRIS 313-8987]		indx	ERS468391
215	IRIS 313-11508	PAWNG AEW 1::IRGC 55263-1::[IRIS 313-11508]	IRGC 127722	ind3	ERS468716
216	IRIS 313-11558	NULI::IRGC 58824-1::[IRIS 313-11558]	IRGC 127684	ind2	ERS468755
217	IRIS 313-12296	SABALINE::IRGC 98059-1::[IRIS 313-12296]	IRGC 127773	ind3	ERS469311
218	IRIS 313-10887	ARC 12690::IRGC 22257-1::[IRIS 313-10887]	IRGC 127147	indx	ERS469692
219	IRIS 313-10972	DUDA MONOR::IRGC 26335-2::[IRIS 313-10972]	IRGC 128033	ind2	ERS469774
220	IRIS 313-11129	HAORU::IRGC 33090-2::[IRIS 313-11129]	IRGC 128051	indx	ERS469928
221	IRIS 313-11144	TAUNGDI::IRGC 33746-2::[IRIS 313-11144]	IRGC 128181	indx	ERS469944
222	IRIS 313-11326	BR 51-115-4::IRGC 43999-1::[IRIS 313-11326]	IRGC 127237	indx	ERS470119
223	B075	JINBAOYIN::[B075]		indx	ERS470289
224	B118	ERGANGAI::[B118]		indx	ERS470328
225	B242	GUI 630::[B242]		indx	ERS470440
226	B244	XIANGDAO::[B244]		ind1A	ERS470442
227	CX303	LX2007::[CX303]	IRGC 135976	indx	ERS470605
228	IRIS 313-10648	PREAH SIHANOUK::IRGC 11328-2::[IRIS 313-10648]	IRGC 132364	ind3	ERS469468
229	IRIS 313-10974	KAMRANGA::IRGC 26373-2::[IRIS 313-10974]	IRGC 128070	ind2	ERS469777
230	IRIS 313-11276	ARC 15063::IRGC 41909-2::[IRIS 313-11276]	IRGC 132319	indx	ERS470064
231	CX28	GAYABYEO::[CX28]	IRGC 135892	ind1B	ERS470590
232	IRIS 313-8811	KATUNG::IRGC 71536-1::[IRIS 313-8811]	IRGC 131940	ind3	ERS468267
233	IRIS 313-11570	GENG 77-4::IRGC 59321-1::[IRIS 313-11570]	IRGC 127383	indx	ERS468764
234	IRIS 313-11177	DELI POCONG::IRGC 35265-1::[IRIS 313-11177]	IRGC 127309	indx	ERS470013
235	IRIS 313-11212	KALOBONA::IRGC 37478-2::[IRIS 313-11212]	IRGC 132309	ind2	ERS470004
236	IRIS 313-11416	KONAMANI::IRGC 49806-1::[IRIS 313-11416]	IRGC 127529	ind2	ERS470207
237	B086	MUGUANUO::[B086]		admix	ERS470298
238	IRIS 313-8731	NIBARI::IRGC 67742-1::[IRIS 313-8731]	IRGC 126119	ind2	ERS467968
239	IRIS 313-9403	BADUIE::IRGC 53715-1::[IRIS 313-9403]	IRGC 125666	ind2	ERS468066
240	IRIS 313-10392	IR 77390-1-6-4-19-1-B::IRGC 117303-1::[IRIS 313-10392]	IRGC 127075	ind1B	ERS468305
241	IRIS 313-11762	NS 1515::IRGC 68947-1::[IRIS 313-11762]	IRGC 127682	ind2	ERS468926
242	IRIS 313-11816	KARILETYONE::IRGC 70745-1::[IRIS 313-11816]	IRGC 127493	indx	ERS468966
243	IRIS 313-11958	PUANG MAHLAI KHAO::IRGC 76959-1::[IRIS 313-11958]		ind3	ERS469103
244	IRIS 313-11282	ARC 15589::IRGC 42096-2::[IRIS 313-11282]	IRGC 132243	ind2	ERS470070
245	IRIS 313-11302	ARC 14899::IRGC 43016-1::[IRIS 313-11302]	IRGC 127154	indx	ERS470092
246	IRIS 313-11310	ARC 15929::IRGC 43269-2::[IRIS 313-11310]	IRGC 127968	ind2	ERS470101
247	IRIS 313-11318	TUBU::IRGC 43677-2::[IRIS 313-11318]	IRGC 128195	ind3	ERS470110
248	IRIS 313-9285	PALEPYU::IRGC 33549-1::[IRIS 313-9285]	IRGC 125866	indx	ERS468051
249	IRIS 313-9187	WANGKOD::IRGC 71646-1::[IRIS 313-9187]	IRGC 126991	ind2	ERS467852
250	IRIS 313-8303	SURMATIYA::IRGC 74779-1::[IRIS 313-8303]	IRGC 126008	ind2	ERS467931
251	IRIS 313-10855	ARC 10159::IRGC 20754-2::[IRIS 313-10855]	IRGC 132316	ind2	ERS469658
252	IRIS 313-11148	YEBAW::IRGC 33875-2::[IRIS 313-11148]	IRGC 128203	ind3	ERS469948
253	IRIS 313-10441	CASIBON::IRGC 589-2::[IRIS 313-10441]	IRGC 132327	indx	ERS469358
254	IRIS 313-11138	NGASEIN THEEDAT (C 30)::IRGC 33504-2::[IRIS 313-11138]	IRGC 128119	ind3	ERS469937
255	IRIS 313-11417	LAWANGAI::IRGC 49850-2::[IRIS 313-11417]	IRGC 132256	admix	ERS470208
256	IRIS 313-8783	105::IRGC 40896-1::[IRIS 313-8783]	IRGC 126170	admix	ERS467974
257	IRIS 313-10257	ALTAMIRA 9::IRGC 116953-1::[IRIS 313-10257]	IRGC 127031	indx	ERS468299
258	IRIS 313-11375	CODE NO 31225::IRGC 46865-2::[IRIS 313-11375]	IRGC 128018	aro	ERS470168
259	IRIS 313-10272	COLOMBIA 1::IRGC 116970-1::[IRIS 313-10272]	IRGC 125714	japx	ERS467805
260	B038	NABATED A SMAR::[B038]	IRGC 135997	temp	ERS470255
261	IRIS 313-12011	YU TOU ZHONG::IRGC 79749-1::[IRIS 313-12011]	IRGC 128510	indx	ERS469149
262	IRIS 313-11117	KAYELI KUNING::IRGC 31974-1::[IRIS 313-11117]	IRGC 127502	trop	ERS469914
263	IRIS 313-10531	HR 22::IRGC 6394-1::[IRIS 313-10531]	IRGC 128310	admix	ERS469395
264	IRIS 313-9636	PODI HEENATI::IRGC 36345-1::[IRIS 313-9636]	IRGC 121473	aus	ERS467788
265	IRIS 313-9696	NAZIRA SAIL::IRGC 77284-1::[IRIS 313-9696]	IRGC 125850	indx	ERS467880
266	IRIS 313-11223	OVAL RED 29 B 601::IRGC 38130-2::[IRIS 313-11223]	IRGC 128122	aro	ERS470015
267	IRIS 313-8060	77 UPLA::GERVEX 159-C1::[IRIS 313-8060]	IRGC 121955	trop	ERS468628
268	IRIS 313-12164	PA YANG NOEUGN::IRGC 87778-1::[IRIS 313-12164]	IRGC 127723	japx	ERS469245
269	IRIS 313-11404	AMON 4::IRGC 49375-2::[IRIS 313-11404]	IRGC 127925	ind2	ERS470196
270	IRIS 313-11948	HOU LU BAI::IRGC 76582-1::[IRIS 313-11948]	IRGC 127417	ind1A	ERS469093
271	IRIS 313-10918	T Q QI QINYUHAYUHA::IRGC 23342-1::[IRIS 313-10918]	IRGC 135803	trop	ERS469716
272	IRIS 313-11500	SKK::IRGC 54356-1::[IRIS 313-11500]	IRGC 127816	ind2	ERS468712
273	IRIS 313-15899	IR 45427-2B-2-2B-1-1::G1::[IRIS 313-15899]	IRGC 126961	indx	ERS467756
274	IRIS 313-15906	IR 73571-3B-11-3-K2::G1::[IRIS 313-15906]	IRGC 126963	indx	ERS467763
275	IRIS 313-9939	CIWINI SML::IRGC 50642-1::[IRIS 313-9939]	IRGC 121316	admix	ERS467768
276	IRIS 313-11312	PADI HITAM::IRGC 43496-1::[IRIS 313-11312]	IRGC 135781	ind3	ERS470103
277	IRIS 313-9648	NEWREX::IRGC 64657-1::[IRIS 313-9648]	IRGC 125855	admix	ERS467811
278	IRIS 313-9817	GEANT W 7::IRGC 9620-1::[IRIS 313-9817]	IRGC 121342	ind2	ERS467812
279	IRIS 313-9601	CHAWAL::IRGC 73090-1::[IRIS 313-9601]	IRGC 121606	aro	ERS467816
280	IRIS 313-9949	PANNITHI::IRGC 51049-1::[IRIS 313-9949]	IRGC 126078	trop	ERS467818
281	IRIS 313-8655	TAK::IRGC 73124-1::[IRIS 313-8655]	IRGC 121582	aus	ERS467820
282	IRIS 313-8771	SIMUL KHURI::IRGC 35154-1::[IRIS 313-8771]	IRGC 121120	aus	ERS467821
283	IRIS 313-10158	PICO NEGRO::IRGC 55849-1::[IRIS 313-10158]	IRGC 126080	indx	ERS467843
284	IRIS 313-9558	LIMBAYAN::IRGC 71556-1::[IRIS 313-9558]	IRGC 126302	trop	ERS467858
285	IRIS 313-9641	BEGUM::IRGC 33990-1::[IRIS 313-9641]	IRGC 125602	aus	ERS467864
286	IRIS 313-9695	SOLAY GHAT::IRGC 73121-1::[IRIS 313-9695]	IRGC 131919	aus	ERS467865
287	IRIS 313-8622	XITTO::IRGC 6671-1::[IRIS 313-8622]	IRGC 126294	ind2	ERS467885
288	IRIS 313-8872	571::IRGC 48493-1::[IRIS 313-8872]	IRGC 125630	japx	ERS467896
289	IRIS 313-9516	NCS 840::IRGC 62530-1::[IRIS 313-9516]	IRGC 126251	ind2	ERS467912
290	IRIS 313-10349	CSR-90 IR-2::IRGC 117327-1::[IRIS 313-10349]	IRGC 120921	indx	ERS467922
291	IRIS 313-10412	RR 272-17-829::IRGC 117354-1::[IRIS 313-10412]	IRGC 121103	indx	ERS467928
292	IRIS 313-8737	SADAJIRA 19-287::IRGC 38320-1::[IRIS 313-8737]	IRGC 126270	ind2	ERS467970
293	IRIS 313-9114	LEUANG 28-1-87::IRGC 874-1::[IRIS 313-9114]	IRGC 125822	indx	ERS468022
294	IRIS 313-9120	SONAPATNAI::IRGC 46695-1::[IRIS 313-9120]	IRGC 125905	admix	ERS468026
295	IRIS 313-9208	KACIK TARAM::IRGC 35310-1::[IRIS 313-9208]	IRGC 126165	ind3	ERS468038
296	IRIS 313-9727	NAN TE HAO::IRGC 59797-1::[IRIS 313-9727]	IRGC 125849	ind1A	ERS468110
297	IRIS 313-9767	CI 9445::IRGC 2081-1::[IRIS 313-9767]	IRGC 125711	indx	ERS468114
298	IRIS 313-9778	GENIT::IRGC 3272-1::[IRIS 313-9778]	IRGC 125751	admix	ERS468115
299	IRIS 313-10325	CAMPONI::IRGC 116963-1::[IRIS 313-10325]	IRGC 125956	indx	ERS468195
300	IRIS 313-10396	IR 80340-23-B-12-6-B::IRGC 117309-1::[IRIS 313-10396]	IRGC 125987	indx	ERS468203
301	IRIS 313-10061	ESTRELA A::IRGC 72918-1::[IRIS 313-10061]	IRGC 125733	japx	ERS468413
302	IRIS 313-9685	AGEPDAUJSECAN::IRGC 49361-1::[IRIS 313-9685]		indx	ERS468292
303	IRIS 313-11252	ADR 52::IRGC 40638-2::[IRIS 313-11252]		indx	ERS470047
304	IRIS 313-8302	KAMJA::IRGC 62171-1::[IRIS 313-8302]	IRGC 126116	admix	ERS468373
305	IRIS 313-9423	AGUYOD::IRGC 67423-1::[IRIS 313-9423]	IRGC 125635	trop	ERS468399
306	IRIS 313-8323	REXARK ROGUE::IRGC 1972-1::[IRIS 313-8323]		trop	ERS468433
307	IRIS 313-8911	LEK::IRGC 40199-1::[IRIS 313-8911]		admix	ERS468446
308	IRIS 313-8127	POLIZESTI 28::GERVEX 1170-C1::[IRIS 313-8127]	IRGC 122207	temp	ERS468482
309	IRIS 313-8184	FRAGANCE::GERVEX 1651-C1::[IRIS 313-8184]	IRGC 122050	admix	ERS468528
310	IRIS 313-7638	ANGIFOTSY 685::GERVEX 4717-C1::[IRIS 313-7638]	IRGC 121963	indx	ERS468568
311	IRIS 313-7641	B 6144-MR-6-0-0::C1::[IRIS 313-7641]	IRGC 121974	indx	ERS468589
312	IRIS 313-7646	BETSILAIZINA::GERVEX 8405-C1::[IRIS 313-7646]	IRGC 124378	admix	ERS468592
313	IRIS 313-7859	CIRAD 358::C1::[IRIS 313-7859]	IRGC 135521	subtrop	ERS468596
314	IRIS 313-7924	IRAT 335::C1::[IRIS 313-7924]	IRGC 122120	trop	ERS468609
315	IRIS 313-7866	CNA 7\BO\1\1>33-13-6-1::C1::[IRIS 313-7866]	IRGC 122018	trop	ERS468610
316	IRIS 313-7885	GOGO::IRGC 43390-C1::[IRIS 313-7885]	IRGC 122063	trop	ERS468617
317	IRIS 313-7722	LATSIBOZAKA 112-1::GERVEX 8233-C1::[IRIS 313-7722]	IRGC 127001	admix	ERS468626
318	IRIS 313-11449	KODIA PHUL::IRGC 52168-1::[IRIS 313-11449]	IRGC 127526	indx	ERS468666
319	IRIS 313-11452	LOCAL BHAT::IRGC 52343-1::[IRIS 313-11452]	IRGC 127571	aus	ERS468668
320	IRIS 313-11476	KALIPINCH::IRGC 53271-1::[IRIS 313-11476]	IRGC 128329	aus	ERS468686
321	IRIS 313-11497	PADI ARA::IRGC 54252-2::[IRIS 313-11497]	IRGC 135630	ind2	ERS468708
322	IRIS 313-11534	NAHNG KHAO BOW::IRGC 57377-1::[IRIS 313-11534]		ind3	ERS468732
323	IRIS 313-11542	KHAO KUM PAR::IRGC 57966-1::[IRIS 313-11542]	IRGC 132402	admix	ERS468741
324	IRIS 313-11551	FELEGBASEH::IRGC 58443-1::[IRIS 313-11551]	IRGC 135566	ind3	ERS468749
325	IRIS 313-11627	JADO::IRGC 61966-1::[IRIS 313-11627]	IRGC 127448	aro	ERS468806
326	IRIS 313-11608	KHAO BAWNG::IRGC 61260-1::[IRIS 313-11608]		ind3	ERS468811
327	IRIS 313-11650	NCS 901 A::IRGC 62568-1::[IRIS 313-11650]	IRGC 127668	ind2	ERS468826
328	IRIS 313-11690	KOCHUM::IRGC 64906-1::[IRIS 313-11690]	IRGC 132005	admix	ERS468865
329	IRIS 313-11754	AMBOHIMANDAY::IRGC 68330-1::[IRIS 313-11754]	IRGC 128214	admix	ERS468917
330	IRIS 313-11766	TSIMIAKABIJA::IRGC 69074-1::[IRIS 313-11766]	IRGC 128490	admix	ERS468930
331	IRIS 313-11779	KATUMANI::IRGC 69695-1::[IRIS 313-11779]	IRGC 127500	ind3	ERS468936
332	IRIS 313-11876	AI DA::IRGC 72567-1::[IRIS 313-11876]	IRGC 127113	ind1A	ERS469028
333	IRIS 313-11075	KHAO NAM YEN::IRGC 29546-2::[IRIS 313-11075]	IRGC 128084	japx	ERS469877
334	IRIS 313-12004	TANALA::IRGC 79467-1::[IRIS 313-12004]	IRGC 132045	admix	ERS469142
335	IRIS 313-12282	TSY MILA RO::IRGC 97233-1::[IRIS 313-12282]	IRGC 132302	indx	ERS469299
336	IRIS 313-10484	PILIT (7480) SELN (CI 12007)::IRGC 3758-1::[IRIS 313-10484]	IRGC 127729	ind1A	ERS469374
337	IRIS 313-10510	MAGSIING::IRGC 5211-1::[IRIS 313-10510]	IRGC 127589	indx	ERS469385
338	IRIS 313-10520	NATURAL HYBRID C 33-8::IRGC 5929-1::[IRIS 313-10520]		indx	ERS469394
339	IRIS 313-10580	PARAY KINARABAW::IRGC 8083-1::[IRIS 313-10580]	IRGC 127718	trop	ERS469438
340	IRIS 313-10700	CHANTEK 145::IRGC 14045-1::[IRIS 313-10700]		ind3	ERS469515
341	IRIS 313-10703	PADI ADONG DUMARAT::IRGC 14356-1::[IRIS 313-10703]	IRGC 128418	trop	ERS469518
342	IRIS 313-10722	GODAWEL::IRGC 15750-1::[IRIS 313-10722]	IRGC 128301	trop	ERS469528
343	IRIS 313-10738	ANDEL WELUT::IRGC 16339-1::[IRIS 313-10738]	IRGC 131965	admix	ERS469546
344	IRIS 313-10755	NEP BA BONG TO::IRGC 17005-2::[IRIS 313-10755]	IRGC 128116	ind3	ERS469564
345	IRIS 313-10768	GADABUNG (GUNDIL)::IRGC 17569-2::[IRIS 313-10768]	IRGC 132423	ind3	ERS469576
346	IRIS 313-10771	GOGO RAJAPAN::IRGC 17666-2::[IRIS 313-10771]		trop	ERS469579
347	IRIS 313-10796	MOLOG::IRGC 18282-1::[IRIS 313-10796]	IRGC 128390	trop	ERS469605
348	IRIS 313-10841	KETAN NANGKA::IRGC 19961-2::[IRIS 313-10841]	IRGC 128077	trop	ERS469645
349	IRIS 313-10850	ARC 7263::IRGC 20570-2::[IRIS 313-10850]	IRGC 132244	admix	ERS469653
350	IRIS 313-10851	ARC 7296::IRGC 20585-1::[IRIS 313-10851]	IRGC 132387	aro	ERS469654
351	IRIS 313-10858	ARC 10894::IRGC 21122-1::[IRIS 313-10858]	IRGC 127131	indx	ERS469661
352	IRIS 313-10864	ARC 11338::IRGC 21329-1::[IRIS 313-10864]	IRGC 127136	admix	ERS469667
353	IRIS 313-10865	ARC 11424::IRGC 21380-2::[IRIS 313-10865]	IRGC 127938	subtrop	ERS469668
354	IRIS 313-10872	ARC 11802::IRGC 21662-2::[IRIS 313-10872]	IRGC 132421	japx	ERS469676
355	IRIS 313-10881	ARC 12413::IRGC 22044-1::[IRIS 313-10881]	IRGC 128223	admix	ERS469686
356	IRIS 313-10920	PINIDWA QAN QIPUGO QELEK::IRGC 23360-1::[IRIS 313-10920]	IRGC 127732	trop	ERS469718
357	IRIS 313-10896	ARC 13276::IRGC 22622-2::[IRIS 313-10896]	IRGC 127946	admix	ERS469721
358	IRIS 313-10946	MANGGE::IRGC 25019-1::[IRIS 313-10946]	IRGC 128380	trop	ERS469746
359	IRIS 313-10964	SADUMONI::IRGC 25919-1::[IRIS 313-10964]	IRGC 127777	aus	ERS469766
360	IRIS 313-10985	GOBOL SAIL (BALAM)::IRGC 26624-2::[IRIS 313-10985]	IRGC 132424	ind2	ERS469789
361	IRIS 313-11005	PULU LOTONG::IRGC 27380-2::[IRIS 313-11005]	IRGC 128140	trop	ERS469800
362	IRIS 313-11008	PULUT CENRANA::IRGC 27400-2::[IRIS 313-11008]	IRGC 128142	trop	ERS469804
363	IRIS 313-11030	MUTANT 12-42::IRGC 28076-1::[IRIS 313-11030]		aro	ERS469828
364	IRIS 313-11033	RATRIO::IRGC 28181-1::[IRIS 313-11033]	IRGC 128448	admix	ERS469831
365	IRIS 313-11044	BUKU::IRGC 28683-2::[IRIS 313-11044]	IRGC 128005	trop	ERS469843
366	IRIS 313-11065	BORO 394::IRGC 29297-2::[IRIS 313-11065]	IRGC 132326	aus	ERS469866
367	IRIS 313-10995	ASE BAKKA LOMPO::IRGC 26988-2::[IRIS 313-10995]	IRGC 127976	ind3	ERS469878
368	IRIS 313-11098	KOLUBA::IRGC 30463-1::[IRIS 313-11098]	IRGC 134993	ind3	ERS469893
369	IRIS 313-11121	GBRA::IRGC 32474-2::[IRIS 313-11121]	IRGC 132249	trop	ERS469919
370	IRIS 313-11126	ANBAW::IRGC 32932-2::[IRIS 313-11126]	IRGC 127926	indx	ERS469924
371	IRIS 313-11136	NGAKWE THETYIN::IRGC 33477-2::[IRIS 313-11136]	IRGC 128117	admix	ERS469935
372	IRIS 313-11145	THAKADE THEEDAT::IRGC 33772-2::[IRIS 313-11145]	IRGC 128183	ind3	ERS469945
373	IRIS 313-11161	SADU::IRGC 34514-2::[IRIS 313-11161]	IRGC 132266	trop	ERS469963
374	IRIS 313-11189	PAIZ AMBARBU::IRGC 36179-1::[IRIS 313-11189]	IRGC 128424	admix	ERS469979
375	IRIS 313-11207	PAIRJAT::IRGC 37252-2::[IRIS 313-11207]	IRGC 128126	ind2	ERS469998
376	IRIS 313-11208	PARIJAT::IRGC 37272-2::[IRIS 313-11208]	IRGC 128129	indx	ERS469999
377	IRIS 313-11214	SHITTA AMAN::IRGC 37596-1::[IRIS 313-11214]	IRGC 127799	aus	ERS470006
378	IRIS 313-11216	KHAMA 1183::IRGC 37685-2::[IRIS 313-11216]	IRGC 128082	aus	ERS470007
379	IRIS 313-11222	DUDHSWAR 15-157::IRGC 37967-2::[IRIS 313-11222]	IRGC 132308	ind2	ERS470014
380	IRIS 313-11227	SADAJIRA 19-317::IRGC 38344-2::[IRIS 313-11227]	IRGC 128154	ind2	ERS470019
381	IRIS 313-11231	STRAW 23-471::IRGC 38456-1::[IRIS 313-11231]	IRGC 135799	ind2	ERS470023
382	IRIS 313-11235	PINILING DANIEL::IRGC 38828-2::[IRIS 313-11235]	IRGC 128137	indx	ERS470028
383	IRIS 313-11248	NIAW KHAMIN::IRGC 40222-1::[IRIS 313-11248]	IRGC 127676	trop	ERS470042
384	IRIS 313-11259	ARC 13515::IRGC 41134-2::[IRIS 313-11259]	IRGC 127949	aro	ERS470054
385	IRIS 313-11297	ARC 13460::IRGC 42732-2::[IRIS 313-11297]	IRGC 127947	admix	ERS470087
386	IRIS 313-11300	ARC 14709::IRGC 42976-2::[IRIS 313-11300]	IRGC 127960	ind2	ERS470090
387	IRIS 313-11307	ARC 15387::IRGC 43175-2::[IRIS 313-11307]	IRGC 127965	indx	ERS470098
388	IRIS 313-11313	PADI RENDAH::IRGC 43515-1::[IRIS 313-11313]	IRGC 128420	trop	ERS470104
389	IRIS 313-11329	PADI JALAI BELA::IRGC 44084-1::[IRIS 313-11329]	IRGC 127701	trop	ERS470122
390	IRIS 313-11334	DINGRAS::IRGC 44402-1::[IRIS 313-11334]		ind3	ERS470125
391	IRIS 313-11342	PODAO::IRGC 44701-1::[IRIS 313-11342]		indx	ERS470134
392	IRIS 313-11354	CAC 75::IRGC 45352-2::[IRIS 313-11354]	IRGC 128008	ind2	ERS470147
393	IRIS 313-11407	BATCHA BHOG (SCENTED)::IRGC 49440-2::[IRIS 313-11407]	IRGC 127989	ind2	ERS470199
394	IRIS 313-11413	KALAR KAR::IRGC 49737-2::[IRIS 313-11413]	IRGC 132420	aus	ERS470204
395	IRIS 313-11424	SINAPLED::IRGC 50402-1::[IRIS 313-11424]	IRGC 127807	trop	ERS470215
396	B021	SELN 244A6-20::[B021]	IRGC 136044	indx	ERS470239
397	B023	GAOLIQIU::[B023]	IRGC 135891	temp	ERS470240
398	B025	DJANDA MANDJA::[B025]	IRGC 135881	trop	ERS470242
399	B037	NANOAY P.A::[B037]	IRGC 135999	trop	ERS470254
400	B049	ZACAODAO 13::[B049]	IRGC 136086	aus	ERS470264
401	B064	XIANGZAOXIAN 7::[B064]		indx	ERS470278
402	B129	HONGAINUO::[B129]		indx	ERS470339
403	B134	XISHI 15::[B134]		subtrop	ERS470344
404	B141	GENG 7623::[B141]		admix	ERS470351
405	B161	YELICANGHUA::[B161]		temp	ERS470371
406	B164	QINGKE::[B164]		aus	ERS470374
407	B173	TJANTAJAN::[B173]	IRGC 136056	admix	ERS470382
408	B192	R42::[B192]	IRGC 136033	admix	ERS470396
409	B197	TAIZHONGXIANXUAN 2::[B197]		ind1A	ERS470401
410	B205	CUNSANLI::[B205]		japx	ERS470409
411	B228	HAOBAYONG 1::[B228]		japx	ERS470428
412	CX104	SADRI RICE 1::[CX104]	IRGC 136037	aro	ERS470469
413	CX106	SAL BUI BAO::[CX106]	IRGC 136040	trop	ERS470470
414	CX207	GAOZI::[CX207]		indx	ERS470537
415	CX227	KASALATH::[CX227]	IRGC 117617	aus	ERS470551
416	CX266	DINORADO::[CX266]	IRGC 135880	trop	ERS470578
417	CX275	IR34::[CX275]		indx	ERS470586
418	CX32	MANAUTHUKHA::[CX32]	IRGC 135980	japx	ERS470618
419	CX352	BD007::[CX352]	IRGC 135839	trop	ERS470637
420	CX367	HAOGELAO::[CX367]		trop	ERS470652
421	CX368	N22::[CX368]	IRGC 135996	aus	ERS470653
422	CX371	NERICA 1::[CX371]	IRGC 136000	trop	ERS470657
423	CX395	YSBR1::[CX395]	IRGC 136082	admix	ERS470681
424	CX53	JIANGXISIMIAO::[CX53]	IRGC 135954	indx	ERS470703
425	CX61	BHAVANI::[CX61]	IRGC 135844	ind1A	ERS470715
426	CX77	LEMONT::[CX77]	IRGC 117802	trop	ERS470730
427	CX94	SWARNA::[CX94]	IRGC 117278	indx	ERS470748
428	IRIS 313-10459	PI 160862-1::IRGC 1452-1::[IRIS 313-10459]		japx	ERS469368
429	CX243	IR47686-6-2-1-1::[CX243]	IRGC 135922	trop	ERS470567
430	CX78	M401::[CX78]	IRGC 135978	temp	ERS470731
431	IRIS 313-9783	BERENJ 1277 S::IRGC 3461-1::[IRIS 313-9783]	IRGC 121902	admix	ERS467817
432	IRIS 313-10359	IR 53650-2B-10-1-2-1::IRGC 117379-1::[IRIS 313-10359]	IRGC 125973	indx	ERS467844
433	IRIS 313-8314	BEUREUM MEULIT::IRGC 35563-1::[IRIS 313-8314]	IRGC 126047	trop	ERS467932
434	IRIS 313-8822	STRAW 23-400::IRGC 38390-1::[IRIS 313-8822]		aus	ERS467977
435	IRIS 313-11595	AMAKOYALI::IRGC 60878-1::[IRIS 313-11595]	IRGC 128213	aus	ERS468782
436	IRIS 313-12324	BER YA::IRGC 99970-1::[IRIS 313-12324]	IRGC 128241	subtrop	ERS469331
437	IRIS 313-10489	MOROPOTOL::IRGC 3909-1::[IRIS 313-10489]	IRGC 127630	trop	ERS469376
438	IRIS 313-10507	HSIANG TSENF TAO::IRGC 5008-1::[IRIS 313-10507]	IRGC 128311	trop	ERS469383
439	IRIS 313-10543	DODGUI::IRGC 6666-1::[IRIS 313-10543]	IRGC 128281	aus	ERS469403
440	IRIS 313-10581	P PEY SIQAT::IRGC 8129-1::[IRIS 313-10581]	IRGC 127741	trop	ERS469439
441	IRIS 313-10684	BONGOLON::IRGC 13094-1::[IRIS 313-10684]	IRGC 135740	ind3	ERS469503
442	IRIS 313-10776	KABADOKA::IRGC 17775-2::[IRIS 313-10776]	IRGC 132343	trop	ERS469584
443	IRIS 313-10848	ARC 6188::IRGC 20370-1::[IRIS 313-10848]	IRGC 131968	subtrop	ERS469650
444	IRIS 313-10862	ARC 11281::IRGC 21283-1::[IRIS 313-10862]	IRGC 127135	japx	ERS469665
445	IRIS 313-11003	PAE MEETO::IRGC 27254-1::[IRIS 313-11003]	IRGC 127918	trop	ERS469798
446	IRIS 313-11012	TELURIKAN::IRGC 27478-1::[IRIS 313-11012]	IRGC 132046	admix	ERS469808
447	IRIS 313-10992	PILIT TAPUL::IRGC 26887-1::[IRIS 313-10992]	IRGC 127730	trop	ERS469845
448	IRIS 313-11070	TUPA::IRGC 29432-1::[IRIS 313-11070]	IRGC 127239	admix	ERS469872
449	IRIS 313-11116	KORTIK KAIKA::IRGC 31841-1::[IRIS 313-11116]	IRGC 127532	aus	ERS469913
450	IRIS 313-11160	B 38::IRGC 34409-1::[IRIS 313-11160]	IRGC 127195	ind3	ERS469962
451	IRIS 313-11421	TULASIBAS::IRGC 50192-2::[IRIS 313-11421]	IRGC 128196	ind2	ERS470212
452	B003	ZAOSHENGBAI::[B003]	IRGC 136088	japx	ERS470221
453	B132	XIAOBAIMI::[B132]		indx	ERS470342
454	B166	JIANGHUADAO::[B166]	IRGC 135953	temp	ERS470376
455	B184	CHANH 148::[B184]	IRGC 135862	indx	ERS470389
456	CX373	NERICA 8::[CX373]	IRGC 136002	trop	ERS470659
457	CX46	PUSA(BASMATI 1)::[CX46]	IRGC 136026	admix	ERS470695
458	IRIS 313-11159	HYB 5-2-1-1-4::IRGC 34283-2::[IRIS 313-11159]	IRGC 132251	trop	ERS469961
459	IRIS 313-8256	GERDEH::[IRIS 313-8256]	IRGC 117474	japx	ERS467893
460	IRIS 313-10263	CUYAMEL 3820::IRGC 116975-1::[IRIS 313-10263]	IRGC 125961	indx	ERS468185
461	IRIS 313-8873	PAOTSUPAGAIAHON::IRGC 17072-1::[IRIS 313-8873]	IRGC 125867	admix	ERS468311
462	IRIS 313-10057	CHUGOKU 68 HEN::IRGC 72514-1::[IRIS 313-10057]	IRGC 125707	temp	ERS468354
463	IRIS 313-10025	KALAPATLE::IRGC 68500-1::[IRIS 313-10025]	IRGC 125790	admix	ERS468412
464	IRIS 313-8209	ALEXANDROS::GERVEX 1678-C1::[IRIS 313-8209]	IRGC 121962	trop	ERS468463
465	IRIS 313-8200	OPALE::GERVEX 1667-C1::[IRIS 313-8200]	IRGC 122183	temp	ERS468500
466	IRIS 313-8027	ANSEATICO::GERVEX 67-C1::[IRIS 313-8027]	IRGC 121964	japx	ERS468533
467	IRIS 313-8137	SAGRES::GERVEX 1258-C1::[IRIS 313-8137]	IRGC 121820	japx	ERS468557
468	IRIS 313-7870	CUIABANA::IRTP 17401-C1::[IRIS 313-7870]	IRGC 122027	japx	ERS468604
469	IRIS 313-7856	CHA LOY OE::C1::[IRIS 313-7856]	IRGC 122004	subtrop	ERS468613
470	IRIS 313-8160	CT 58::GERVEX 1491-C1::[IRIS 313-8160]	IRGC 122024	temp	ERS468639
471	IRIS 313-11894	LOC TRANG MUON::IRGC 73216-1::[IRIS 313-11894]	IRGC 128368	indx	ERS469036
472	IRIS 313-12252	A MOUK::IRGC 94474-1::[IRIS 313-12252]	IRGC 128215	subtrop	ERS469282
473	IRIS 313-12275	MAGU::IRGC 97027-1::[IRIS 313-12275]	IRGC 127590	indx	ERS469293
474	IRIS 313-12311	TAM::IRGC 99161-1::[IRIS 313-12311]	IRGC 128481	subtrop	ERS469324
475	IRIS 313-10562	SENG CHUI LIN::IRGC 7313-1::[IRIS 313-10562]	IRGC 128463	japx	ERS469420
476	IRIS 313-10614	HAM MOON::IRGC 9135-2::[IRIS 313-10614]	IRGC 128049	indx	ERS469460
477	IRIS 313-11156	KHUDWANI ACC 202::IRGC 34154-1::[IRIS 313-11156]	IRGC 127522	japx	ERS469957
478	B035	AMERICAN RICE::[B035]	IRGC 135828	indx	ERS470252
479	B053	80A97YR303-304-1-3::[B053]	IRGC 135819	trop	ERS470267
480	B103	LAOHONGDAO::[B103]		temp	ERS470313
481	B109	LENGSHUIGU 2::[B109]		japx	ERS470319
482	B117	LIXINGENG::[B117]		temp	ERS470327
483	B145	TEQINGXUANHUI::[B145]		indx	ERS470355
484	CX103	RUBIO::[CX103]	IRGC 136036	admix	ERS470468
485	CX205	IR69428-6-1-1-3-3::[CX205]	IRGC 135935	japx	ERS470535
486	CX213	CHENNONG 89366::[CX213]		temp	ERS470542
487	CX29	MILYANG23::[CX29]	IRGC 135984	admix	ERS470599
488	CX307	HP121::[CX307]		japx	ERS470609
489	CX343	WANXIAN 77::[CX343]	IRGC 136069	indx	ERS470627
490	CX353	CAU1::[CX353]	IRGC 135860	japx	ERS470638
491	CX354	CAU2::[CX354]	IRGC 135861	japx	ERS470639
492	CX383	HONGZA::[CX383]		temp	ERS470669
493	CX386	NPT-114::[CX386]	IRGC 136012	indx	ERS470672
494	B231	B231::[B231]		indx
495	IRIS 313-12148	ARN'-SAR THNGORN'::IRGC 87205-1::[IRIS 313-12148]	IRGC 127172	Unclassified	ERS469239
496	CX51	BABAOMI::[CX51]	IRGC 135835	Unclassified	ERS470701
497	IRIS 313-10348	CSR-89 IR-15::IRGC 117326-1::[IRIS 313-10348]	IRGC 125959	Unclassified	ERS467921
498	B044	SANTIANNUO::[B044]	IRGC 136042	Unclassified	ERS470259
499	IRIS 313-10545	KARIA::IRGC 6702-1::[IRIS 313-10545]	IRGC 127492	Unclassified	ERS469405
500	IRIS 313-11279	ARC 15455::IRGC 42040-2::[IRIS 313-11279]	IRGC 127967	Unclassified	ERS470067
501	IRIS 313-8935	ARC 18061::IRGC 47650-1::[IRIS 313-8935]	IRGC 127034	Unclassified	ERS467995
502	IRIS 313-11260	ARC 13591::IRGC 41177-2::[IRIS 313-11260]	IRGC 127950	Unclassified	ERS470055
503	IRIS 313-10856	ARC 10537::IRGC 20981-1::[IRIS 313-10856]	IRGC 128220	Unclassified	ERS469659
504	IRIS 313-11956	JUNGEMARSI::IRGC 76901-1::[IRIS 313-11956]	IRGC 128325	Unclassified	ERS469101
505	B137	80B::[B137]		Unclassified	ERS470347
506	IRIS 313-11410	C 28-16::IRGC 49580-1::[IRIS 313-11410]	IRGC 132393	Unclassified	ERS470202
507	CX34	BG 300::[CX34]	IRGC 135840	Unclassified	ERS470623
508	CX278	IR68::[CX278]	IRGC 135932	Unclassified	ERS470589
509	CX60	BASMATI::[CX60]	IRGC 117652	Unclassified	ERS470714
510	IRIS 313-10572	KOTHMALLI KARUPPAN::IRGC 7842-1::[IRIS 313-10572]	IRGC 127533	Unclassified	ERS469430
511	IRIS 313-10980	DUDHSAR::IRGC 26458-1::[IRIS 313-10980]	IRGC 127344	Unclassified	ERS469783
512	IRIS 313-10690	LARONDJAWI::IRGC 13571-2::[IRIS 313-10690]	IRGC 132350	Unclassified	ERS469507
513	B087	ZHONGNONG 4::[B087]		Unclassified	ERS470299
514	IRIS 313-11095	MAK EA NAM::IRGC 30131-2::[IRIS 313-11095]	IRGC 128104	Unclassified	ERS469890
515	B130	WANLIXIAN::[B130]		Unclassified	ERS470340
516	IRIS 313-11176	SXC 216::IRGC 35175-1::[IRIS 313-11176]	IRGC 127831	Unclassified	ERS470003
517	IRIS 313-11130	HTAWPATT::IRGC 33125-2::[IRIS 313-11130]	IRGC 128055	Unclassified	ERS469929
518	B072	QIUQIANBAI::[B072]		Unclassified	ERS470286
519	B221	FANHAOPI::[B221]		Unclassified	ERS470421
520	CX69	MR167::[CX69]	IRGC 135990	Unclassified	ERS470722
521	CX280	MARAVILHA::[CX280]	IRGC 135981	Unclassified	ERS470591
522	IRIS 313-8288	AVO::[IRIS 313-8288]	IRGC 117430	Unclassified	ERS467866
523	IRIS 313-11628	KARISHNABELI::IRGC 61979-1::[IRIS 313-11628]	IRGC 127494	Unclassified	ERS468807
524	CX542	RR2-6::[CX542]		Unclassified	ERS470706
525	B020	JINEIYADAO::[B020]	IRGC 135958	Unclassified	ERS470238
526	CX13	R644::[CX13]		Unclassified	ERS470495
527	IRIS 313-8067	MEDUSA::GERVEX 323-C1::[IRIS 313-8067]	IRGC 122165	Unclassified	ERS468467
528	CX5	108S::[CX5]		Unclassified	ERS470699
529	IRIS 313-11415	KAUSHI::IRGC 49789-1::[IRIS 313-11415]		Unclassified	ERS470206
530	IRIS 313-10729	MALOGBANA::IRGC 16086-1::[IRIS 313-10729]	IRGC 128379	Unclassified	ERS469536
531	IRIS 313-10786	KETAN URANG::IRGC 17980-1::[IRIS 313-10786]		Unclassified	ERS469594
532	B158	TAIZHONG 65/TAIZHONGHR539::[B158]		Unclassified	ERS470368
533	IRIS 313-10739	GOGO::IRGC 16418-1::[IRIS 313-10739]	IRGC 135567	Unclassified	ERS469547
534	IRIS 313-11257	ARC 12757::IRGC 41095-2::[IRIS 313-11257]	IRGC 127944	Unclassified	ERS470052
535	B139	IR 661-1::[B139]		Unclassified	ERS470349
536	IRIS 313-11031	NAWAN SATHRA BAGAR 344::IRGC 28079-1::[IRIS 313-11031]	IRGC 128403	Unclassified	ERS469829
537	CX242	IR47686-4-4-B-1::[CX242]	IRGC 135921	Unclassified	ERS470566
538	CX249	2004::[CX249]	IRGC 135814	Unclassified	ERS470570
539	CX365	COMPACT PLANT TYPE MATERIAL::[CX365]		Unclassified	ERS470650
540	B152	ZAOSHUNONGHU 6::[B152]		Unclassified	ERS470362
541	CX210	QB_604::[CX210]	IRGC 136028	Unclassified	ERS470539
542	IRIS 313-11270	ARC 14663::IRGC 41671-2::[IRIS 313-11270]	IRGC 127959	Unclassified	ERS470106
543	IRIS 313-11380	CA ONG (WHITE)::IRGC 47174-1::[IRIS 313-11380]	IRGC 128253	Unclassified	ERS470172
544	CX11	GUMEI 2::[CX11]		Unclassified	ERS470474
545	CX49	NAN-29-2::[CX49]	IRGC 135998	Unclassified	ERS470698

## Sheet: Table S4
Table S4. High-resolution multi-level haplotype classification of the NGR5 region of 3KRG
Description: Details of the NGR5 haplotypes identified in the 3K Rice Genomes (3KRG) dataset using the combined list of variant sites obtained from the reference-based SNP-Seek dataset and the de novo assembly-based approach. Both the absolute chromosomal positions (based on the Nipponbare IRGSP-1.0 reference genome) and the relative positions with respect to the translation start site (Chr5: 18,…
				Absolute position (Offset: 18,810,000)				314	338	373	420	423	434	466	567	573	605	634	645	665	687	927	1001	1039	1127	1145	1173	1266	1305	1328	1390	1397	1398	1425	1480	1543	1574	2015	2030	2346	3846	3877	3932	3942	4102	4778	5016	5387	5424
				Reference position (wrt TSS)				-1936	-1912	-1877	-1830	-1827	-1816	-1784	-1683	-1677	-1645	-1616	-1605	-1585	-1563	-1323	-1249	-1211	-1123	-1105	-1077	-984	-945	-922	-860	-853	-852	-825	-770	-707	-676	-235	-220	96	1597	1628	1683	1693	1853	2529	2767	3137	3174
				Annotation				Pro.	Pro.	Pro.	Pro.	Pro.	Pro.	Pro.	Pro.	Pro.	Pro.	Pro.	Pro.	Pro.	Pro.	Pro.	Pro.	Pro.	Pro.	Pro.	Pro.	Pro.	Pro.	Pro.	Pro.	Pro.	Pro.	Pro.	Pro.	Pro.	Pro.	Pro.	Pro.	E1	Int.	Int.	Int.	Int.	Int.	Int.	Int.	Int.	Int.
				SNPs from Wu et al. (2020) (n= 25)
				SNPsfrom SNP-Seek (n=43)
				SNPs from de novo assembly (n= 42)
Haplotype Name	Number of accessions			SNPs from additional sources (n=45)
HAP1a	738						HAP1a	G	C	C	C	A	T	G	C	G	A	G	C	A	T	C	G	G	T	C	C	C	G	G	C	T	G	T	G	T	T	C	T	A	A	G	A	G	C	T	T	C	G
HAP1b	166						HAP1b	G	C	A	C	A	T	G	C	G	A	G	C	A	T	C	G	G	T	C	C	C	G	T	C	T	T	T	G	T	T	N	N	N	A	G	A	G	C	T	T	N	G
HAP2	330						HAP2	G	C	C	C	G	C	A	A	G	G	G	T	G	T	C	A	A	G	C	T	C	A	G	C	G	C	C	A	T	C	A	A	G	G	G	G	A	T	C	C	C	A
HAP3a	47						HAP3a	G	C	C	C	G	C	A	A	G	G	G	T	G	T	C	A	A	G	C	T	C	A	G	C	G	C	C	A	T	C	N	N	N	G	C	G	A	T	C	C	N	A
HAP3b	282						HAP3b	G	C	C	C	G	C	A	A	G	G	G	T	G	T	C	A	A	G	C	T	C	A	G	C	G	C	C	A	T	C	N	N	N	G	G	G	A	T	C	C	N	A
HAP4a	152						HAP4a	G	T	C	T	G	C	A	A	G	G	C	T	G	T	G	A	A	G	C	T	C	A	G	C	G	C	C	A	T	C	N	N	N	G	G	G	A	T	C	C	N	A
HAP4b	509						HAP4b	G	C	C	C	G	C	A	A	G	G	G	T	G	T	C	A	A	G	C	T	C	A	G	C	G	C	C	A	T	C	A	A	G	G	G	G	A	T	C	C	C	A
HAP4c	165						HAP4c	T	C	C	C	G	C	A	A	G	G	G	T	G	T	C	A	A	G	C	T	T	A	G	T	G	C	C	A	T	C	N	N	N	G	G	G	G	T	T	C	N	A
HAP5a	414						HAP5a	G	C	C	C	G	C	A	C	A	G	G	T	G	A	C	A	A	G	A	T	C	G	G	C	G	G	C	A	C	T	C	A	G	G	G	G	G	T	T	C	T	A
HAP5b	16						HAP5b	G	C	C	C	G	C	A	C	G	G	G	T	G	N	C	A	A	G	C	T	C	G	G	C	G	G	C	A	T	T	N	N	N	G	G	G	G	T	T	C	N	A
Haplotype name	IRIS ID	Accession details	IRGC ID	Sub-population based on 3k database	Cluster ID	sd1 allele	De novo assembled/ SNPseek/(RGHUB/NCBI)	SNP loci
HAP1
HAP1a	IRIS 313-8200	OPALE::GERVEX 1667-C1::[IRIS 313-8200]	IRGC 122183	temp	A_10		De novo assembled	G	C	C	C	A	T	G	C	G	A	G	C	A	T	C	G	G	T	C	C	C	G	G	C	T	G	T	G	T	T	N			A	G	A	G	C	T	T		G
HAP1a	IRIS 313-7866	CNA 7\BO\1\1>33-13-6-1::C1::[IRIS 313-7866]	IRGC 122018	trop	A_10		De novo assembled	G	C	C	C	A	T	G	C	G	A	G	C	A	T	C	G	G	T	C	C	C	G	G	C	T	G	T	G	T	T	N			A	G	A	G	C	T	T		G
HAP1a	CX106	SAL BUI BAO::[CX106]	IRGC 136040	trop	A_10		De novo assembled	G	C	C	C	A	T	G	C	G	A	G	C	A	T	C	G	G	T	C	C	C	G	G	C	T	G	T	G	T	T	N			A	G	A	G	C	T	T		G
HAP1a	B192	R42::[B192]	IRGC 136033	admix	A_10	sd1	De novo assembled	G	C	C	C	A	T	G	C	G	A	G	C	A	T	C	G	G	T	C	C	C	G	G	C	T	G	T	G	T	T	N			A	G	A	G	C	T	T		G
HAP1a	CX383	HONGZA::[CX383]		temp	A_10		De novo assembled	G	C	C	C	A	T	G	C	G	A	G	C	A	T	C	G	G	T	C	C	C	G	G	C	T	G	T	G	T	T	N			A	G	A	G	C	T	T		G
HAP1a	IRIS 313-8160	CT 58::GERVEX 1491-C1::[IRIS 313-8160]	IRGC 122024	temp	A_10		De novo assembled	G	C	C	C	A	T	G	C	G	A	G	C	A	T	C	G	G	T	C	C	C	G	G	C	T	G	T	G	T	T	N			A	G	A	G	C	T	T		G
HAP1a	CX352	BD007::[CX352]	IRGC 135839	trop	A_10	sd1	De novo assembled	G	C	C	C	A	T	G	C	G	A	G	C	A	T	C	G	G	T	C	C	C	G	G	C	T	G	T	G	T	T	N			A	G	A	G	C	T	T		G
HAP1a	B134	XISHI 15::[B134]		subtrop	A_10		De novo assembled	G	C	C	C	A	T	G	C	G	A	G	C	A	T	C	G	G	T	C	C	C	G	G	C	T	G	T	G	T	T	N			A	G	A	G	C	T	T		G
HAP1a	IRIS 313-10459	PI 160862-1::IRGC 1452-1::[IRIS 313-10459]		japx	A_10		De novo assembled	G	C	C	C	A	T	G	C	G	A	G	C	A	T	C	G	G	T	C	C	C	G	G	C	T	G	T	G	T	T	N			A	G	A	G	C	T	T		G
HAP1a	B205	CUNSANLI::[B205]		japx	A_10		De novo assembled	G	C	C	C	A	T	G	C	G	A	G	C	A	T	C	G	G	T	C	C	C	G	G	C	T	G	T	G	T	T	N			A	G	A	G	C	T	T		G
HAP1a	IRIS 313-10946	MANGGE::IRGC 25019-1::[IRIS 313-10946]	IRGC 128380	trop	A_10		De novo assembled	G	C	C	C	A	T	G	C	G	A	G	C	A	T	C	G	G	T	C	C	C	G	G	C	T	G	T	G	T	T	N			A	G	A	G	C	T	T		G
HAP1a	B086	MUGUANUO::[B086]		admix	A_10		De novo assembled	G	C	C	C	A	T	G	C	G	A	G	C	A	T	C	G	G	T	C	C	C	G	G	C	T	G	T	G	T	T	N			A	G	A	G	C	T	T		G
HAP1a	CX266	DINORADO::[CX266]	IRGC 135880	trop	A_10		De novo assembled	G	C	C	C	A	T	G	C	G	A	G	C	A	T	C	G	G	T	C	C	C	G	G	C	T	G	T	G	T	T	N			A	G	A	G	C	T	T		G
HAP1a	IRIS 313-7885	GOGO::IRGC 43390-C1::[IRIS 313-7885]	IRGC 122063	trop	A_10		De novo assembled	G	C	C	C	A	T	G	C	G	A	G	C	A	T	C	G	G	T	C	C	C	G	G	C	T	G	T	G	T	T	N			A	G	A	G	C	T	T		G
HAP1a	IRIS 313-11044	BUKU::IRGC 28683-2::[IRIS 313-11044]	IRGC 128005	trop	A_10		De novo assembled	G	C	C	C	A	T	G	C	G	A	G	C	A	T	C	G	G	T	C	C	C	G	G	C	T	G	T	G	T	T	N			A	G	A	G	C	T	T		G
HAP1a	IRIS 313-11295	ARC 11397::IRGC 42664-1::[IRIS 313-11295]	IRGC 127137	admix	A_9		De novo assembled	G	C	C	C	A	T	G	C	G	A	G	C	A	T	C	G	G	T	C	C	C	G	G	C	T	G	T	G	T	T	N			A	G	A	G	C	T	T		G
HAP1a	B109	LENGSHUIGU 2::[B109]		japx	Not assigned		De novo assembled	G	C	C	C	A	T	G	C	G	A	G	C	A	T	C	G	G	T	C	C	C	G	G	C	T	G	T	G	T	T	N			A	G	A	G	C	T	T		G
HAP1a	B038	NABATED A SMAR::[B038]	IRGC 135997	temp	A_10		De novo assembled	G	C	C	C	A	T	G	C	G	A	G	C	A	T	C	G	G	T	C	C	C	G	G	C	T	G	T	G	T	T	N			A	G	A	G	C	T	T		G
HAP1a	IRIS 313-8127	POLIZESTI 28::GERVEX 1170-C1::[IRIS 313-8127]	IRGC 122207	temp	A_10		De novo assembled	G	C	C	C	A	T	G	C	G	A	G	C	A	T	C	G	G	T	C	C	C	G	G	C	T	G	T	G	T	T	N			A	G	A	G	C	T	T		G
HAP1a	IRIS 313-11714	CHAMPION::IRGC 66327-1::[IRIS 313-11714]	IRGC 127256	indx	A_10	sd1	De novo assembled	G	C	C	C	A	T	G	C	G	A	G	C	A	T	C	G	G	T	C	C	C	G	G	C	T	G	T	G	T	T	N			A	G	A	G	C	T	T		G
HAP1a	IRIS 313-8323	REXARK ROGUE::IRGC 1972-1::[IRIS 313-8323]		trop	A_10		De novo assembled	G	C	C	C	A	T	G	C	G	A	G	C	A	T	C	G	G	T	C	C	C	G	G	C	T	G	T	G	T	T	N			A	G	A	G	C	T	T		G
HAP1a	IRIS 313-8027	ANSEATICO::GERVEX 67-C1::[IRIS 313-8027]	IRGC 121964	japx	A_10		De novo assembled	G	C	C	C	A	T	G	C	G	A	G	C	A	T	C	G	G	T	C	C	C	G	G	C	T	G	T	G	T	T	N			A	G	A	G	C	T	T		G
HAP1a	IRIS 313-9648	NEWREX::IRGC 64657-1::[IRIS 313-9648]	IRGC 125855	admix	A_10		De novo assembled	G	C	C	C	A	T	G	C	G	A	G	C	A	T	C	G	G	T	C	C	C	G	G	C	T	G	T	G	T	T	N			A	G	A	G	C	T	T		G
HAP1a	IRIS 313-10841	KETAN NANGKA::IRGC 19961-2::[IRIS 313-10841]	IRGC 128077	trop	A_10		De novo assembled	G	C	C	C	A	T	G	C	G	A	G	C	A	T	C	G	G	T	C	C	C	G	G	C	T	G	T	G	T	T	N			A	G	A	G	C	T	T		G
HAP1a	IRIS 313-8137	SAGRES::GERVEX 1258-C1::[IRIS 313-8137]	IRGC 121820	japx	A_10		De novo assembled	G	C	C	C	A	T	G	C	G	A	G	C	A	T	C	G	G	T	C	C	C	G	G	C	T	G	T	G	T	T	N			A	G	A	G	C	T	T		G
HAP1a	IRIS 313-11591	PULUT MERAH 2::IRGC 60427-1::[IRIS 313-11591]	IRGC 132293	admix	A_10		De novo assembled	G	C	C	C	A	T	G	C	G	A	G	C	A	T	C	G	G	T	C	C	C	G	G	C	T	G	T	G	T	T	N			A	G	A	G	C	T	T		G
HAP1a	IRIS 313-8209	ALEXANDROS::GERVEX 1678-C1::[IRIS 313-8209]	IRGC 121962	trop	A_10		De novo assembled	G	C	C	C	A	T	G	C	G	A	G	C	A	T	C	G	G	T	C	C	C	G	G	C	T	G	T	G	T	T	N			A	G	A	G	C	T	T		G
HAP1a	IRIS 313-7859	CIRAD 358::C1::[IRIS 313-7859]	IRGC 135521	subtrop	A_10		De novo assembled	G	C	C	C	A	T	G	C	G	A	G	C	A	T	C	G	G	T	C	C	C	G	G	C	T	G	T	G	T	T	N			A	G	A	G	C	T	T		G
HAP1a	IRIS 313-10703	PADI ADONG DUMARAT::IRGC 14356-1::[IRIS 313-10703]	IRGC 128418	trop	A_10		De novo assembled	G	C	C	C	A	T	G	C	G	A	G	C	A	T	C	G	G	T	C	C	C	G	G	C	T	G	T	G	T	T	N			A	G	A	G	C	T	T		G
HAP1a	B161	YELICANGHUA::[B161]		temp	A_10		De novo assembled	G	C	C	C	A	T	G	C	G	A	G	C	A	T	C	G	G	T	C	C	C	G	G	C	T	G	T	G	T	T	N			A	G	A	G	C	T	T		G
HAP1a	IRIS 313-10738	ANDEL WELUT::IRGC 16339-1::[IRIS 313-10738]	IRGC 131965	admix	A_10		De novo assembled	G	C	C	C	A	T	G	C	G	A	G	C	A	T	C	G	G	T	C	C	C	G	G	C	T	G	T	G	T	T	N			A	G	A	G	C	T	T		G
HAP1a	IRIS 313-10862	ARC 11281::IRGC 21283-1::[IRIS 313-10862]	IRGC 127135	japx	A_10		De novo assembled	G	C	C	C	A	T	G	C	G	A	G	C	A	T	C	G	G	T	C	C	C	G	G	C	T	G	T	G	T	T	N			A	G	A	G	C	T	T		G
HAP1a	B003	ZAOSHENGBAI::[B003]	IRGC 136088	japx	A_10		De novo assembled	G	C	C	C	A	T	G	C	G	A	G	C	A	T	C	G	G	T	C	C	C	G	G	C	T	G	T	G	T	T	N			A	G	A	G	C	T	T		G
HAP1a	IRIS 313-11075	KHAO NAM YEN::IRGC 29546-2::[IRIS 313-11075]	IRGC 128084	japx	Not assigned		De novo assembled	G	C	C	C	A	T	G	C	G	A	G	C	A	T	C	G	G	T	C	C	C	G	G	C	T	G	T	G	T	T	N			A	G	A	G	C	T	T		G
HAP1a	IRIS 313-8060	77 UPLA::GERVEX 159-C1::[IRIS 313-8060]	IRGC 121955	trop	A_10		De novo assembled	G	C	C	C	A	T	G	C	G	A	G	C	A	T	C	G	G	T	C	C	C	G	G	C	T	G	T	G	T	T	N			A	G	A	G	C	T	T		G
HAP1a	IRIS 313-9423	AGUYOD::IRGC 67423-1::[IRIS 313-9423]	IRGC 125635	trop	Not assigned		De novo assembled	G	C	C	C	A	T	G	C	G	A	G	C	A	T	C	G	G	T	C	C	C	G	G	C	T	G	T	G	T	T	N			A	G	A	G	C	T	T		G
HAP1a	IRIS 313-12324	BER YA::IRGC 99970-1::[IRIS 313-12324]	IRGC 128241	subtrop	Not assigned		De novo assembled	G	C	C	C	A	T	G	C	G	A	G	C	A	T	C	G	G	T	C	C	C	G	G	C	T	G	T	G	T	T	N			A	G	A	G	C	T	T		G
HAP1a	B025	DJANDA MANDJA::[B025]	IRGC 135881	trop	A_10		De novo assembled	G	C	C	C	A	T	G	C	G	A	G	C	A	T	C	G	G	T	C	C	C	G	G	C	T	G	T	G	T	T	N			A	G	A	G	C	T	T		G
HAP1a	IRIS 313-7856	CHA LOY OE::C1::[IRIS 313-7856]	IRGC 122004	subtrop	A_10		De novo assembled	G	C	C	C	A	T	G	C	G	A	G	C	A	T	C	G	G	T	C	C	C	G	G	C	T	G	T	G	T	T	N			A	G	A	G	C	T	T		G
HAP1a	IRIS 313-10025	KALAPATLE::IRGC 68500-1::[IRIS 313-10025]	IRGC 125790	admix	A_9		De novo assembled	G	C	C	C	A	T	G	C	G	A	G	C	A	T	C	G	G	T	C	C	C	G	G	C	T	G	T	G	T	T	N			A	G	A	G	C	T	T		G
HAP1a	IRIS 313-10522	SUKAMANDI 1005::IRGC 6065-1::[IRIS 313-10522]		admix	Not assigned		De novo assembled	G	C	C	C	A	T	G	C	G	A	G	C	A	T	C	G	G	T	C	C	C	G	G	C	T	G	T	G	T	T	N			A	G	A	G	C	T	T		G
HAP1a	IRIS 313-10061	ESTRELA A::IRGC 72918-1::[IRIS 313-10061]	IRGC 125733	japx	A_10		De novo assembled	G	C	C	C	A	T	G	C	G	A	G	C	A	T	C	G	G	T	C	C	C	G	G	C	T	G	T	G	T	T	N			A	G	A	G	C	T	T		G
HAP1a	IRIS 313-10865	ARC 11424::IRGC 21380-2::[IRIS 313-10865]	IRGC 127938	subtrop	A_10		De novo assembled	G	C	C	C	A	T	G	C	G	A	G	C	A	T	C	G	G	T	C	C	C	G	G	C	T	G	T	G	T	T	N			A	G	A	G	C	T	T		G
HAP1a	B053	80A97YR303-304-1-3::[B053]	IRGC 135819	trop	A_10		De novo assembled	G	C	C	C	A	T	G	C	G	A	G	C	A	T	C	G	G	T	C	C	C	G	G	C	T	G	T	G	T	T	N			A	G	A	G	C	T	T		G
HAP1a	CX314	117::[CX314]	IRGC 135813	ind1B	A_10		De novo assembled	G	C	C	C	A	T	G	C	G	A	G	C	A	T	C	G	G	T	C	C	C	G	G	C	T	G	T	G	T	T	N			A	G	A	G	C	T	T		G
HAP1a	IRIS 313-10848	ARC 6188::IRGC 20370-1::[IRIS 313-10848]	IRGC 131968	subtrop	A_10		De novo assembled	G	C	C	C	A	T	G	C	G	A	G	C	A	T	C	G	G	T	C	C	C	G	G	C	T	G	T	G	T	T	N			A	G	A	G	C	T	T		G
HAP1a	B152	ZAOSHUNONGHU 6::[B152]		temp	A_10		De novo assembled	G	C	C	C	A	T	G	C	G	A	G	C	A	T	C	G	G	T	C	C	C	G	G	C	T	G	T	G	T	T	N			A	G	A	G	C	T	T
HAP1a	IRIS 313-11156	KHUDWANI ACC 202::IRGC 34154-1::[IRIS 313-11156]	IRGC 127522	japx	A_10		De novo assembled	G	C	C	C	A	T	G	C	G	A	G	C	A	T	C	G	G	T	C	C	C	G	G	C	T	G	T	G	T	T	N			A	G	A	G	C	T	T
HAP1a	B103	LAOHONGDAO::[B103]		temp	A_10		De novo assembled	G	C	C	C	A	T	G	C	G	A	G	C	A	T	C	G	G	T	C	C	C	G	G	C	T	G	T	G	T	T	N			A	G	A	G	C	T	T
HAP1a	B037	NANOAY P.A::[B037]	IRGC 135999	trop	D_1		De novo assembled	G	C	C	C	A	T	G	C	G	A	G	C	A	T	C	G	G	T	C	C	C	G	G	C	T	G	T	G	T	T	N			A	G	A	G	C	T	T		G
HAP1a	CX395	YSBR1::[CX395]	IRGC 136082	admix	A_10		De novo assembled	G	C	C	C	A	T	G	C	G	A	G	C	A	T	C	G	G	T	C	C	C	G	G	C	T	G	T	G	T	T	N			A	G	A	G	C	T	T		G
HAP1a	B023	GAOLIQIU::[B023]	IRGC 135891	temp	A_10		De novo assembled	G	C	C	C	A	T	G	C	G	A	G	C	A	T	C	G	G	T	C	C	C	G	G	C	T	G	T	G	T	T	N			A	G	A	G	C	T	T
HAP1a	B124	GENG 87-304::[B124]		temp			SNPseek				C	A	T		C	G	A	G	C	A		C	G	G		C		C		G	C	T		T	G	T						G	A	G	C	T	T/C
HAP1a	IRIS 313-9961	WIR 884::IRGC 51591-1::[IRIS 313-9961]	IRGC 125939	temp			SNPseek				C	A	T	G	C	G	A	G	C	A		C	G	G	T	C	C	C	G	G	C	T		T	G	T	T				A	G	A	G	C	T	T		G
HAP1a	IRIS 313-9297	KORR::IRGC 30751-1::[IRIS 313-9297]	IRGC 126155	trop			SNPseek				C	A	T	G		G	A	G	C	A		C	G	G	T	C	C	C		G/T	C	T		T	G	T	T				A	G	A	G	C	T	T		G
HAP1a	IRIS 313-10082	KYUUSHUU::IRGC 74558-1::[IRIS 313-10082]	IRGC 125816	trop			SNPseek				C	A	T	G	C	G	A	G	C	A		C	G	G	T	C	C	C	G	G/T	C	T		T	G	T	T				A	G	A	G	C	T	T		G
HAP1a	IRIS 313-8439	KENDINGA 5 (H)::IRGC 60310-1::[IRIS 313-8439]	IRGC 126220	trop			SNPseek				C	A	T	G	C	G	A	G	C	A		C			T	C	C	C	G	G/T	C			T	G	T	T				A	G	A	G	C	T	T		G
HAP1a	IRIS 313-11698	TAIPEI 167::IRGC 65371-1::[IRIS 313-11698]	IRGC 128479	aro			SNPseek				C	A	T	G	C	G	A	G	C	A		C	G	G	T	C	C	C		G/T	C	T		T	G	T	T				A	G	A	G		T
HAP1a	IRIS 313-12279	RAMADITRA::IRGC 97124-1::[IRIS 313-12279]	IRGC 132296	trop			SNPseek				C	A	T	G	C	G	A	G	C	A		C		G	T	C	C	C	G	G/T	C	T		T	G	T	T				A	G	A	G	C	T	T		G
HAP1a	IRIS 313-10704	PADI DARAWAL::IRGC 14373-1::[IRIS 313-10704]	IRGC 128419	trop			SNPseek				C	A	T	G	C	G	A	G	C	A		C	G	G	T	C	C	C	G	G/T	C	T		T	G	T	T				A	G	A	G	C	T	T		G
HAP1a	IRIS 313-10784	KETAN SAPI::IRGC 17954-2::[IRIS 313-10784]	IRGC 128079	trop			SNPseek				C	A	T	G	C	G	A	G	C	A		C			T	C	C	C	G	G	C			T/C	G	T	T				A	G	A	G	C	T	T		G
HAP1a	IRIS 313-11102	D 1-39::IRGC 30868-1::[IRIS 313-11102]		trop			SNPseek				C	A	T	G	C	G	A	G	C	A		C	G	G	T	C	C	C	G	G/T	C	T		T	G	T	T				A	G	A	G	C	T	T		G
HAP1a	B001	HEIBIAO::[B001]	IRGC 135900	temp			SNPseek				C	A	T	G	C	G	A	G	C	A		C	G	G	T		C/T	C	G	G	C	T		T	G		T				A	G	A	G	C	T	T		G
HAP1a	B014	WUZILUOSI 215::[B014]	IRGC 136072	temp			SNPseek						T	G	C	G	A	G	C	A		C		G	T	C	C	C	G	G	C	T			G	T	T				A	G		G/A	C		T		G
HAP1a	B154	LIMING B::[B154]		temp			SNPseek				C	A						G				C	G/A		T	C	C	C	G	G	C	T		T	G	T	T				A	G	A	G	C		T		G
HAP1a	IRIS 313-15904	JINBUBYEO::G1::[IRIS 313-15904]	IRGC 126967	temp			SNPseek				C	A	T	G	C	G	A	G	C	A		C	G	G	T	C	C	C	G	G	C	T		T	G	T	T				A	G	A	G	C	T	T		G
HAP1a	IRIS 313-15905	WAB 56-125::IRTP 19771-G1::[IRIS 313-15905]	IRGC 126969	trop			SNPseek				C	A	T	G	C	G	A	G	C	A		C	G	G	T	C	C	C	G	G	C	T		T	G	T	T				A	G	A	G	C	T	T		G
HAP1a	IRIS 313-15907	INIA TACUARI::G1::[IRIS 313-15907]	IRGC 126959	trop			SNPseek				C	A	T	G	C	G	A	G	C	A		C	G	G	T	C	C	C	G	G	C	T		T	G	T	T				A	G	A	G	C	T	T		G
HAP1a	IRIS 313-15910	CYPRESS::IRTP 19532-G1::[IRIS 313-15910]	IRGC 126956	trop		sd1	SNPseek				C	A	T	G	C	G	A	G	C	A		C	G	G	T	C	C	C	G	G	C	T		T		T	T				A	G	A	G	C	T	T		G
HAP1a	IRIS 313-8399	68-2::IRGC 14546-1::[IRIS 313-8399]	IRGC 126113	temp			SNPseek				C	A	T	G	C	G	A	G	C	A		C	G	G	T	C	C	C	G	G	C	T		T	G	T	T				A	G	A	G	C	T	T		G
HAP1a	IRIS 313-8890	WIR 1072::IRGC 57496-1::[IRIS 313-8890]	IRGC 121541	temp			SNPseek				C	A	T	G	C	G	A	G	C	A		C	G	G	T	C	C	C	G	G	C	T		T	G	T	T				A	G	A	G	C	T	T		G
HAP1a	IRIS 313-9346	SHINCHIKU IKU 103::IRGC 10430-1::[IRIS 313-9346]	IRGC 121501	temp			SNPseek				C	A	T	G	C	G	A	G	C	A		C	G	G		C	C	C	G	G	C	T		T	G	T	T				A	G	A	G	C	T	T		G
HAP1a	IRIS 313-9814	AMARELO::IRGC 9389-1::[IRIS 313-9814]	IRGC 121249	temp			SNPseek				C	A	T	G	C	G	A	G	C	A		C	G	G	T	C	C	C	G	G	C	T		T	G	T	T				A	G	A	G	C	T	T		G
HAP1a	IRIS 313-8927	NABESHI::[IRIS 313-8927]	IRGC 117535	subtrop			SNPseek				C	A	T	G	C	G	A	G	C	A		C	G	G	T	C	C	C	G	G	C	T		T	G	T	T				A	G	A	G	C	T	T		G
HAP1a	IRIS 313-9519	WANICA::IRGC 3394-1::[IRIS 313-9519]	IRGC 125936	trop			SNPseek				C	A	T	G	C	G	A	G	C	A		C	G	G	T	C	C	C	G	G	C	T		T	G	T	T				A	G	A	G	C	T	T		G
HAP1a	IRIS 313-8769	KOSAGI::IRGC 57692-1::[IRIS 313-8769]	IRGC 126225	trop			SNPseek				C	A	T	G	C	G	A	G	C	A		C	G	G	T	C	C	C	G	G	C	T		T	G	T	T				A	G	A	G	C	T	T		G
HAP1a	IRIS 313-8999	ARC 11430 B::IRGC 14567-1::[IRIS 313-8999]	IRGC 125640	subtrop			SNPseek				C	A	T	G	C	G	A	G	C	A		C	G	G	T	C	C	C	G	G	C	T		T	G	T	T				A	G	A	G	C	T	T		G
HAP1a	IRIS 313-9949	PANNITHI::IRGC 51049-1::[IRIS 313-9949]	IRGC 126078	trop			SNPseek				C			G	C	G	A	G	C	A		C	G	G	T	C	C	C	G	G	C	T		T	G	T	T				A	G	A	G	C	T	T		G
HAP1a	IRIS 313-10041	BOTOHAVANA MENA::IRGC 69349-1::[IRIS 313-10041]	IRGC 126049	trop			SNPseek				C	A	T	G	C	G	A	G	C	A		C	G	G	T	C	C	C	G	G	C	T		T	G	T	T				A	G	A	G	C	T	T		G
HAP1a	IRIS 313-8232	IR 62266-42-6-2::[IRIS 313-8232]	IRGC 117597	trop			SNPseek				C	A	T	G	C	G	A	G	C	A		C	G	G	T	C	C	C	G	G	C	T		T	G	T	T				A	G	A	G	C	T	T		G
HAP1a	IRIS 313-9438	7507-137::IRGC 40081-1::[IRIS 313-9438]	IRGC 121242	temp			SNPseek				C	A	T	G	C	G	A	G	C	A		C	G	G	T	C	C	C	G	G	C	T		T	G	T	T				A	G	A	G	C	T	T		G
HAP1a	IRIS 313-9724	AI DA ZHONG::IRGC 59348-1::[IRIS 313-9724]	IRGC 121246	temp			SNPseek				C	A	T	G	C	G	A	G	C	A		C	G	G	T	C	C	C	G	G	C	T		T	G	T	T				A	G	A	G	C	T	T		G
HAP1a	IRIS 313-9759	OEIRAS::IRGC 286-1::[IRIS 313-9759]	IRGC 125860	temp			SNPseek				C	A	T	G	C	G	A	G	C	A		C	G	G	T	C	C	C	G	G	C	T		T		T	T				A	G	A	G	C	T	T		G
HAP1a	IRIS 313-9880	PI 282203::IRGC 16292-1::[IRIS 313-9880]	IRGC 121471	temp			SNPseek				C	A	T	G	C	G	A	G	C	A		C	G	G	T	C	C	C	G	G	C	T		T	G	T	T				A	G	A	G	C	T	T		G
HAP1a	IRIS 313-8578	KHAU TRA BONG::IRGC 78342-1::[IRIS 313-8578]	IRGC 125992	subtrop			SNPseek				C	A	T	G	C	G	A	G	C	A		C	G	G	T	C	C	C	G	G	C	T		T	G	T	T				A	G	A	G	C	T	T		G
HAP1a	IRIS 313-8594	MINATANDA::IRGC 74613-1::[IRIS 313-8594]		trop			SNPseek					A	T	G	C	G	A	G	C	A		C	G	G	T	C	C	C	G	G	C	T		T	G	T	T				A	G	A	G	C	T	T		G
HAP1a	IRIS 313-8883	LOMPUG::IRGC 71559-1::[IRIS 313-8883]		japx			SNPseek				C	A	T	G	C	G	A	G	C	A		C	G	G	T	C	C	C	G	G	C	T		T	G	T	T				A	G	A	G	C	T	T		G
HAP1a	IRIS 313-9267	CHIRGUA 1 I 22::IRGC 3408-1::[IRIS 313-9267]	IRGC 125703	trop			SNPseek				C	A	T	G	C	G	A	G	C	A		C	G	G	T	C	C	C	G	G	C	T		T	G	T	T				A	G	A	G	C	T	T		G
HAP1a	IRIS 313-9363	MAYBELLE::IRGC 78629-1::[IRIS 313-9363]	IRGC 125835	trop			SNPseek				C	A	T	G	C	G	A	G	C	A		C	G	G	T	C	C	C	G	G	C	T		T		T	T				A	G	A	G	C	T	T		G
HAP1a	IRIS 313-9928	DEO KITAN::IRGC 47197-1::[IRIS 313-9928]	IRGC 126057	trop			SNPseek				C	A	T	G	C	G	A	G	C	A		C	G	G	T	C	C	C	G	G	C	T		T	G	T	T				A	G	A	G	C	T	T		G
HAP1a	IRIS 313-9703	CHIANAN 8::IRGC 90-1::[IRIS 313-9703]	IRGC 125701	temp			SNPseek				C	A	T	G	C	G	A	G	C	A		C	G	G	T	C	C	C	G	G	C	T		T	G	T	T				A	G	A	G	C	T	T		G
HAP1a	IRIS 313-9770	RAZZA 77::IRGC 3130-1::[IRIS 313-9770]		temp			SNPseek				C	A	T	G	C	G	A	G	C	A		C	G	G	T	C	C	C	G	G				T	G	T	T				A	G	A	G	C	T	T		G
HAP1a	IRIS 313-9811	KOPANCSI KEREK::IRGC 9305-1::[IRIS 313-9811]	IRGC 125808	temp			SNPseek				C	A	T	G	C	G	A	G	C	A		C	G	G		C		C	G	G	C	T		T	G	T	T				A	G	A	G	C	T	T		G
HAP1a	IRIS 313-8523	OS 4::[IRIS 313-8523]	IRGC 117543	trop			SNPseek				C	A	T	G	C	G	A	G	C	A		C	G	G	T	C	C	C	G	G	C	T		T	G	T	T				A	G	A	G	C	T	T		G
HAP1a	IRIS 313-9301	KETAN DONGGO::IRGC 54201-1::[IRIS 313-9301]	IRGC 126068	trop			SNPseek				C	A	T	G	C	G	A	G	C	A		C	G	G	T	C	C	C	G	G	C	T		T	G	T	T				A	G	A	G	C	T	T		G
HAP1a	IRIS 313-8356	BLICCA::IRGC 47151-1::[IRIS 313-8356]	IRGC 126188	trop			SNPseek				C	A	T	G	C	G	A	G	C	A		C	G	G	T	C	C	C	G	G	C	T		T	G	T	T				A	G	A	G	C	T	T		G
HAP1a	IRIS 313-8735	NEP NGAU::IRGC 78369-1::[IRIS 313-8735]	IRGC 126074	japx			SNPseek				C	A	T	G	C	G	A	G	C	A		C	G	G	T	C	C	C	G	G	C	T		T	G	T	T				A	G	A	G		T	T		G
HAP1a	IRIS 313-9048	TSCHINANANGKA::IRGC 64935-1::[IRIS 313-9048]	IRGC 125930	subtrop			SNPseek				C	A	T	G	C	G	A	G	C	A		C	G	G	T	C	C	C	G	G	C	T		T	G	T	T				A	G	A	G	C	T	T		G
HAP1a	IRIS 313-9081	TAKAO MOCHI::IRGC 2564-1::[IRIS 313-9081]	IRGC 125915	temp			SNPseek				C			G	C	G	A	G				C	G	G	T	C	C	C	G	G	C	T		T	G	T	T				A	G	A	G	C	T			G
HAP1a	IRIS 313-10258	BULI INIA::IRGC 116961-1::[IRIS 313-10258]	IRGC 126050	temp			SNPseek				C	A	T	G	C	G	A	G	C	A		C	G	G	T	C	C	C	G	G	C	T		T	G	T	T				A	G	A	G	C	T	T		G
HAP1a	IRIS 313-9682	TK RED 35-799::IRGC 38535-1::[IRIS 313-9682]	IRGC 135548	aro			SNPseek				C				C	G	A	G	C	A		C	G	G	T	C	C	C	G	G	C	T		T	G	T	T				A	G	A	G	C	T	T		G
HAP1a	IRIS 313-8932	PATISAIL::IRGC 37562-1::[IRIS 313-8932]	IRGC 126079	ind3			SNPseek				C	A	T	G	C	G	A	G	C	A		C	G	G	T	C	C	C	G	G	C	T		T	G	T	T				A	G	A	G	C	T	T		G
HAP1a	IRIS 313-9123	LEUANG GLIANG::IRGC 71271-1::[IRIS 313-9123]	IRGC 125823	subtrop		sd1	SNPseek								C	G	A	G	C	A		C	G	G	T	C	C	C	G	G	C	T		T	G	T	T				A	G	A	G	C	T	T		G
HAP1a	IRIS 313-9506	TIMA::IRGC 67856-1::[IRIS 313-9506]		admix			SNPseek				C	A	T	G	C	G	A	G	C	A		C	G	G	T	C	C	C	G	G	C	T		T	G	T	T				A	G	A	G	C	T	T		G
HAP1a	IRIS 313-9600	E LONG MAH::IRGC 47946-1::[IRIS 313-9600]	IRGC 126133	indx		sd1	SNPseek				C	A	T	G	C	G	A	G	C	A		C	G	G	T	C	C	C	G	G	C	T		T	G	T	T				A	G	A	G	C	T	T		G
HAP1a	IRIS 313-9925	MILYANG 30::IRGC 46977-1::[IRIS 313-9925]	IRGC 125839	ind1B		sd1	SNPseek				C	A	T	G	C	G	A	G	C	A		C	G	G	T	C	C	C	G	G	C	T		T	G	T	T				A	G	A	G	C	T	T		G
HAP1a	IRIS 313-10196	GUO DI HEI::IRGC 72697-1::[IRIS 313-10196]		trop			SNPseek				C	A	T	G	C	G	A	G	C	A		C	G	G	T	C	C	C	G	G	C	T		T	G	T	T				A	G	A	G	C	T	T		G
HAP1a	IRIS 313-10295	PDR 34-2-1-2::IRGC 117020-1::[IRIS 313-10295]	IRGC 127065	admix			SNPseek				C	A	T	G	C	G	A	G	C	A		C	G	G	T	C	C	C	G	G	C	T		T	G	T	T				A	G	A	G	C	T	T		G
HAP1a	IRIS 313-10336	B 6144-MR-6-0-0::IRGC 117371-1::[IRIS 313-10336]		trop			SNPseek				C	A	T	G	C	G	A	G	C	A		C	G	G	T	C	C	C	G	G	C	T		T	G	T	T				A	G	A	G	C	T	T		G
HAP1a	IRIS 313-9249	KANU DAM::IRGC 29755-1::[IRIS 313-9249]	IRGC 125794	temp			SNPseek				C	A	T	G	C	G	A	G	C	A		C	G	G	T	C	C	C	G	G	C	T		T	G	T	T				A	G	A	G	C	T	T		G
HAP1a	IRIS 313-9685	AGEPDAUJSECAN::IRGC 49361-1::[IRIS 313-9685]		indx			SNPseek				C	A	T	G	C	G	A	G	C	A		C	G	G	T	C	C	C	G	G	C	T		T	G	T	T				A	G	A	G	C	T	T		G
HAP1a	IRIS 313-10257	ALTAMIRA 9::IRGC 116953-1::[IRIS 313-10257]	IRGC 127031	indx		sd1	SNPseek				C			G	C	G	A	G	C	A		C	G	G	T	C	C	C	G	G	C	T		T	G	T	T				A	G		G		T	T		G
HAP1a	IRIS 313-8486	DAGPA MRAS::IRGC 62166-1::[IRIS 313-8486]	IRGC 127043	subtrop			SNPseek				C	A	T	G	C	G	A	G	C	A		C	G	G	T	C	C	C	G	G	C	T		T	G	T	T				A	G	A	G	C	T	T		G
HAP1a	IRIS 313-8873	PAOTSUPAGAIAHON::IRGC 17072-1::[IRIS 313-8873]	IRGC 125867	admix			SNPseek				C	A	T	G	C	G	A	G	C	A		C	G	G	T	C	C	C	G	G	C	T		T	G	T	T				A	G	A	G	C	T	T		G
HAP1a	IRIS 313-8923	CALIFORNIA BELLE::IRGC 66836-1::[IRIS 313-8923]	IRGC 125693	trop			SNPseek				C	A	T	G	C	G	A	G	C	A		C	G	G	T	C	C	C	G	G	C	T		T	G	T	T				A	G	A	G	C	T	T		G
HAP1a	IRIS 313-9523	RIKUTO KEMOCHI::[IRIS 313-9523]	IRGC 117569	japx			SNPseek				C	A	T	G	C	G	A	G	C	A		C	G	G	T	C	C	C	G	G	C	T		T	G	T	T				A	G	A	G	C	T	T		G
HAP1a	IRIS 313-8444	M 203::IRGC 76309-1::[IRIS 313-8444]	IRGC 126118	temp			SNPseek				C	A	T	G	C	G	A	G	C	A		C	G	G	T	C	C	C	G	G	C	T		T	G	T	T				A	G	A	G	C	T	T		G
HAP1a	IRIS 313-8502	M 102::IRGC 76307-1::[IRIS 313-8502]	IRGC 125620	temp			SNPseek				C	A	T	G	C	G	A	G	C	A		C	G	G	T	C	C	C	G	G	C	T		T	G	T	T				A	G	A	G	C	T	T		G
HAP1a	IRIS 313-8665	M 7::IRGC 34281-1::[IRIS 313-8665]	IRGC 127058	temp			SNPseek				C	A	T	G	C	G	A	G	C	A		C	G	G	T	C	C	C	G	G	C	T		T	G	T					A	G	A	G	C	T	T		G
HAP1a	IRIS 313-8669	CALROSE 76::IRGC 34275-1::[IRIS 313-8669]	IRGC 125604	japx			SNPseek				C	A	T	G	C	G	A	G	C	A		C	G	G	T	C	C	C	G	G	C	T		T	G	T	T				A	G	A	G	C	T	T		G
HAP1a	IRIS 313-8755	NORIN 6::IRGC 2633-1::[IRIS 313-8755]	IRGC 126120	temp			SNPseek				C	A	T	G	C	G	A	G	C	A		C	G	G	T	C	C	C	G	G	C	T		T	G	T	T				A	G	A	G	C	T	T		G
HAP1a	IRIS 313-8856	S 201::IRGC 55230-1::[IRIS 313-8856]	IRGC 125893	temp			SNPseek				C	A	T	G	C	G	A	G	C	A		C	G	G	T	C	C	C	G	G	C	T		T	G	T	T				A	G	A	G	C	T	T		G
HAP1a	IRIS 313-9002	KOTOBUKI MOCHI::[IRIS 313-9002]	IRGC 117518	temp			SNPseek				C	A	T	G	C	G	A	G	C	A		C	G	G	T	C	C	C	G	G	C	T		T	G	T	T				A	G	A	G	C		T		G
HAP1a	IRIS 313-9193	EAN 4 C 1::IRGC 26016-1::[IRIS 313-9193]	IRGC 125732	japx			SNPseek				C	A	T	G	C	G	A	G	C	A		C	G	G	T	C	C	C	G	G	C	T		T	G	T	T				A	G	A	G	C	T	T		G
HAP1a	IRIS 313-9228	HOKUSETSU::IRGC 65705-1::[IRIS 313-9228]	IRGC 125764	temp			SNPseek				C	A	T	G	C	G	A	G	C	A		C	G	G	T	C	C	C	G	G	C	T		T	G	T	T				A	G	A	G	C	T	T		G
HAP1a	IRIS 313-9233	CHUNG YI::IRGC 1427-1::[IRIS 313-9233]	IRGC 125709	temp			SNPseek				C	A	T	G	C	G	A	G	C	A		C	G	G	T	C	C	C	G	G	C	T		T	G	T	T				A	G	A	G	C	T	T
HAP1a	IRIS 313-9379	HWANGJO::IRGC 55547-1::[IRIS 313-9379]	IRGC 125768	temp			SNPseek				C	A	T	G	C	G	A	G	C	A		C	G	G	T	C	C	C	G	G	C	T		T	G	T	T				A	G	A	G	C	T	T		G
HAP1a	IRIS 313-9410	CI 9498::IRGC 2134-1::[IRIS 313-9410]	IRGC 125712	temp			SNPseek				C	A	T	G	C	G	A	G	C	A		C	G	G	T	C	C	C	G	G	C	T		T	G	T	T				A	G	A	G	C	T	T		G
HAP1a	IRIS 313-9463	CI 1600::IRGC 16305-1::[IRIS 313-9463]	IRGC 125710	temp			SNPseek				C	A	T	G	C	G	A		C	A		C	G	G	T	C	C	C	G	G	C	T		T	G	T	T				A	G	A	G	C	T	T		G
HAP1a	IRIS 313-9468	NONG KE::IRGC 59807-1::[IRIS 313-9468]	IRGC 125856	temp			SNPseek				C	A	T	G	C	G	A	G	C	A		C	G	G	T	C	C	C	G	G	C	T		T	G	T	T				A	G	A	G	C	T	T		G
HAP1a	IRIS 313-9698	JO SANG DAE YA::IRGC 90852-1::[IRIS 313-9698]	IRGC 125788	temp			SNPseek				C	A	T	G	C	G	A	G	C	A		C	G	G	T	C	C	C	G	G	C	T		T	G	T	T					G	A	G	C	T	T		G
HAP1a	IRIS 313-9701	TAICHUNG 65::IRGC 79-1::[IRIS 313-9701]	IRGC 125911	temp			SNPseek				C	A	T	G	C	G	A	G	C	A		C	G	G	T	C	C	C	G	G	C	T		T	G	T	T				A	G	A	G	C	T	T		G
HAP1a	IRIS 313-9702	TAICHUNG 179::IRGC 85-1::[IRIS 313-9702]	IRGC 125910	temp			SNPseek				C	A	T	G	C	G	A	G	C	A		C	G	G	T	C	C	C	G	G	C	T		T	G	T	T				A	G	A	G	C	T	T		G
HAP1a	IRIS 313-9725	DA DAO TOU::IRGC 59499-1::[IRIS 313-9725]	IRGC 125718	temp			SNPseek				C	A	T	G	C	G	A	G	C	A		C	G	G	T	C	C	C	G	G	C	T		T	G	T	T				A	G	A	G	C	T	T		G
HAP1a	IRIS 313-9769	MURASAHITSUTSURI::IRGC 2493-1::[IRIS 313-9769]	IRGC 125846	temp			SNPseek				C	A	T	G	C	G	A	G	C	A		C	G	G	T	C	C	C	G	G	C	T		T	G	T	T				A	G	A	G	C	T	T		G
HAP1a	IRIS 313-9774	EGYPTIAN::IRGC 3217-1::[IRIS 313-9774]	IRGC 125629	japx			SNPseek				C	A	T	G	C	G	A	G	C	A		C	G	G	T	C	C	C	G	G	C	T		T	G	T	T				A	G	A	G	C	T	T		G
HAP1a	IRIS 313-9782	BENLLOK::IRGC 3404-1::[IRIS 313-9782]	IRGC 127036	temp			SNPseek				C	A	T	G	C	G	A	G	C	A		C	G	G	T	C	C	C	G	G	C	T		T	G	T	T				A	G	A	G	C	T	T		G
HAP1a	IRIS 313-9790	JAPONES BALILLA::IRGC 5785-1::[IRIS 313-9790]	IRGC 125781	temp			SNPseek				C	A	T	G	C	G	A	G	C	A		C	G	G	T	C	C	C		G	C	T		T	G	T	T				A	G	A	G	C	T	T		G
HAP1a	IRIS 313-9813	SZANISZLO 2::IRGC 9353-1::[IRIS 313-9813]	IRGC 125908	temp			SNPseek				C	A	T	G	C	G	A	G	C	A		C	G	G	T	C	C	C	G	G	C	T		T	G	T	T				A	G	A	G	C	T	T		G
HAP1a	IRIS 313-9838	TEPUKE::IRGC 12872-1::[IRIS 313-9838]	IRGC 125919	temp			SNPseek				C	A	T	G	C	G	A	G	C	A		C	G	G	T	C	C	C	G	G	C	T		T	G	T	T				A	G	A	G	C	T	T		G
HAP1a	IRIS 313-9839	O. SATIVA::IRGC 12876-1::[IRIS 313-9839]	IRGC 125862	temp			SNPseek				C	A	T	G	C	G	A	G	C	A		C	G	G	T	C	C	C	G	G	C	T		T	G	T	T				A	G	A	G	C	T	T		G
HAP1a	IRIS 313-9884	FUKUSHIMA MOCHI (GLUT)::IRGC 19296-1::[IRIS 313-9884]	IRGC 125743	temp			SNPseek				C	A	T	G	C	G	A	G	C	A		C	G	G	T	C	C	C	G	G	C	T		T	G	T	T				A	G	A	G	C	T	T		G
HAP1a	IRIS 313-9886	HUK ZO::IRGC 19760-1::[IRIS 313-9886]	IRGC 125767	temp			SNPseek				C	A	T	G	C	G	A	G	C	A		C	G	G	T	C	C	C	G	G	C	T		T	G	T	T				A	G	A	G	C	T	T		G
HAP1a	IRIS 313-9887	JEUK DO::IRGC 19775-1::[IRIS 313-9887]	IRGC 125784	temp			SNPseek				C	A	T	G	C	G	A	G	C	A		C	G	G	T	C	C	C	G	G	C	T		T	G	T	T				A	G	A	G	C	T	T		G
HAP1a	IRIS 313-9890	WA BANG::IRGC 19880-1::[IRIS 313-9890]	IRGC 125934	temp			SNPseek				C	A	T	G	C	G	A	G	C	A		C	G	G	T	C	C	C	G	G	C	T		T	G	T	T				A	G	A	G	C	T	T		G
HAP1a	IRIS 313-9891	YONG AN HUK::IRGC 19891-1::[IRIS 313-9891]	IRGC 125945	temp			SNPseek				C	A	T	G	C	G	A	G	C	A		C	G	G	T	C	C	C	G	G	C	T		T	G	T	T				A	G	A	G	C	T	T		G
HAP1a	IRIS 313-9937	ROCCA::IRGC 50351-1::[IRIS 313-9937]	IRGC 125888	temp			SNPseek				C	A	T	G	C	G	A	G		A		C	G	G	T	C	C	C	G	G	C	T		T	G	T	T				A	G	A	G	C	T	T		G
HAP1a	IRIS 313-9964	WIR 1951::IRGC 51643-1::[IRIS 313-9964]	IRGC 125938	temp			SNPseek				C	A	T	G	C	G	A	G	C	A		C	G	G	T	C	C	C	G	G	C	T		T	G	T	T				A	G	A	G	C	T	T		G
HAP1a	IRIS 313-9974	HEUKSANJO::IRGC 55536-1::[IRIS 313-9974]	IRGC 125761	temp			SNPseek				C	A	T	G	C	G	A	G	C	A		C	G	G	T	C	C	C	G	G	C	T		T	G	T	T				A	G	A	G	C	T	T		G
HAP1a	IRIS 313-9996	SUWEON 295::IRGC 58368-1::[IRIS 313-9996]	IRGC 126990	temp			SNPseek				C	A	T	G	C	G	A	G	C	A		C	G	G	T	C	C	C	G	G	C	T		T	G	T	T				A	G	A	G	C	T	T		G
HAP1a	IRIS 313-10014	SANT ANDREA::IRGC 65732-1::[IRIS 313-10014]	IRGC 125898	temp			SNPseek				C	A	T	G	C	G	A	G	C	A		C	G	G	T	C	C	C	G	G	C	T		T	G	T	T				A	G	A	G	C	T	T		G
HAP1a	IRIS 313-10059	DACHEONGBYEO::IRGC 72533-1::[IRIS 313-10059]	IRGC 125717	temp			SNPseek				C	A	T	G	C	G	A	G	C	A		C	G	G	T	C	C	C	G	G	C	T		T	G	T	T				A	G	A	G	C	T	T		G
HAP1a	IRIS 313-10083	BETIS::IRGC 74581-1::[IRIS 313-10083]	IRGC 125679	temp			SNPseek				C	A	T	G	C	G	A	G	C	A		C	G	G	T	C	C	C	G	G	C	T		T	G	T	T				A	G	A	G	C	T	T		G
HAP1a	IRIS 313-10084	SENIA::IRGC 74582-1::[IRIS 313-10084]	IRGC 125899	temp			SNPseek				C	A	T	G	C	G	A	G	C	A		C	G	G	T	C	C	C	G	G	C	T		T	G	T	T				A	G	A	G	C	T	T		G
HAP1a	IRIS 313-10089	KALIN::IRGC 77312-1::[IRIS 313-10089]	IRGC 125791	temp			SNPseek				C	A	T	G	C	G	A	G	C	A		C	G	G	T	C	C	C	G	G	C	T		T	G	T	T				A	G	A	G	C	T	T		G
HAP1a	IRIS 313-10092	CHALBYEO::IRGC 77639-1::[IRIS 313-10092]	IRGC 125698	temp			SNPseek				C	A	T	G	C	G	A	G	C	A		C	G	G	T	C	C	C	G	G	C	T		T	G	T	T				A	G			C	T	T		G
HAP1a	IRIS 313-10093	CHEONJUDO::IRGC 77644-1::[IRIS 313-10093]	IRGC 125700	temp			SNPseek				C	A	T	G	C	G	A	G	C	A		C	G	G	T	C	C	C	G	G	C	T		T	G	T	T				A	G	A	G	C	T	T		G
HAP1a	IRIS 313-10097	MAEKJO::IRGC 77666-1::[IRIS 313-10097]	IRGC 125830	temp			SNPseek				C	A	T	G	C	G	A	G	C	A		C	G	G	T	C	C	C	G	G	C	T		T	G	T	T				A	G	A	G	C	T	T		G
HAP1a	IRIS 313-10111	MOLO::IRGC 81603-1::[IRIS 313-10111]	IRGC 125843	japx			SNPseek				C	A	T	G	C	G	A	G	C	A		C	G	G	T	C	C	C	G	G	C	T		T	G	T	T				A	G	A	G	C	T	T		G
HAP1a	IRIS 313-10119	GITANO::IRGC 82424-1::[IRIS 313-10119]	IRGC 125752	japx			SNPseek				C	A	T	G	C	G	A	G	C	A		C	G	G	T	C	C	C	G	G	C	T		T	G	T	T				A	G	A	G	C	T	T		G
HAP1a	IRIS 313-10164	HAN NUO::IRGC 59591-1::[IRIS 313-10164]	IRGC 125757	temp			SNPseek				C	A	T	G	C	G	A	G	C	A		C	G	G	T	C	C	C	G	G	C	T		T	G	T	T				A	G	A	G	C	T	T		G
HAP1a	IRIS 313-10379	IR 73688-57-2::IRGC 117383-1::[IRIS 313-10379]	IRGC 125980	temp			SNPseek				C	A	T	G	C	G	A	G	C	A		C	G	G	T	C	C	C	G	G	C	T		T	G	T	T				A	G	A	G	C	T	T		G
HAP1a	IRIS 313-8481	DAN YAN NUO::IRGC 4860-1::[IRIS 313-8481]	IRGC 126198	temp			SNPseek				C	A	T	G	C	G	A	G	C	A		C	G	G	T	C	C	C	G	G	C	T		T	G	T	T				A	G	A	G	C	T	T		G
HAP1a	IRIS 313-10242	H 305-84::IRGC 116988-1::[IRIS 313-10242]	IRGC 127074	temp			SNPseek				C	A	T	G	C	G	A	G	C	A		C	G	G	T	C	C	C	G	G	C	T		T	G	T	T				A	G	A	G	C	T	T		G
HAP1a	IRIS 313-9771	BERGREIS::IRGC 3150-1::[IRIS 313-9771]	IRGC 126185	temp			SNPseek				C	A	T	G	C	G	A	G	C	A		C	G	G	T	C	C	C	G	G	C	T		T	G	T	T				A	G	A	G	C	T	T		G
HAP1a	IRIS 313-10373	IR 68333-R-R-B-19::IRGC 117381-1::[IRIS 313-10373]	IRGC 126027	temp			SNPseek				C	A	T	G	C	G	A	G	C	A		C	G	G	T	C	C	C	G	G	C	T		T	G	T	T					G	A	G	C	T	T		G
HAP1a	IRIS 313-8285	KATY::IRGC 77140-1::[IRIS 313-8285]	IRGC 125614	trop			SNPseek				C	A	T	G	C	G	A	G	C	A		C	G	G	T	C	C	C	G	G	C	T		T	G	T	T				A	G	A	G	C	T	T		G
HAP1a	IRIS 313-8339	BOND::IRGC 66755-1::[IRIS 313-8339]	IRGC 125603	trop			SNPseek				C	A	T	G	C	G	A	G	C	A		C	G	G	T	C	C	C	G	G	C	T		T	G	T	T				A	G	A	G	C	T	T		G
HAP1a	IRIS 313-8387	FU LI HONG::IRGC 70250-1::[IRIS 313-8387]	IRGC 125610	temp			SNPseek				C	A	T	G	C	G	A	G	C	A		C	G	G	T	C	C	C	G	G	C	T		T	G	T	T				A	G	A	G	C	T	T		G
HAP1a	IRIS 313-8434	TEBONNET::IRGC 66760-1::[IRIS 313-8434]	IRGC 125625	trop			SNPseek				C	A	T	G	C	G	A	G	C	A		C	G	G	T	C	C	C	G	G	C	T		T	G	T	T				A	G	A	G	C	T	T		G
HAP1a	IRIS 313-8519	MANDASHERPO::IRGC 64913-1::[IRIS 313-8519]	IRGC 125995	subtrop			SNPseek					A	T	G	C	G	A	G	C	A		C	G	G	T	C	C	C	G		C	T		T	G	T	T				A	G	A	G	C	T	T		G
HAP1a	IRIS 313-8768	MOROFIN::IRGC 56698-1::[IRIS 313-8768]	IRGC 127060	trop			SNPseek				C	A	T	G	C	G	A	G	C	A		C	G	G	T	C	C	C	G	G	C	T		T	G	T	T				A	G	A	G	C	T	T		G
HAP1a	IRIS 313-8778	SUP BLUE ROSE::IRGC 1739-1::[IRIS 313-8778]	IRGC 126124	trop			SNPseek				C	A	T	G	C	G	A	G	C	A		C	G	G	T	C	C	C	G	G	C	T		T	G	T	T				A	G	A	G	C	T	T		G
HAP1a	IRIS 313-8815	JANA (NAM)::IRGC 64897-1::[IRIS 313-8815]	IRGC 125780	subtrop			SNPseek				C	A	T	G	C	G	A	G	C	A		C	G	G	T	C	C	C	G	G	C	T		T	G	T	T				A	G	A	G	C	T	T		G
HAP1a	IRIS 313-8857	KAMNAM::IRGC 64902-1::[IRIS 313-8857]	IRGC 125793	subtrop			SNPseek				C	A	T	G	C	G	A	G	C	A		C	G	G	T	C	C	C	G	G	C	T		T	G	T	T				A	G	A	G	C	T	T		G
HAP1a	IRIS 313-8876	DELITUS::IRGC 5769-1::[IRIS 313-8876]	IRGC 125725	trop			SNPseek				C	A	T	G	C	G	A	G	C	A		C	G	G	T	C	C	C	G	G	C	T		T	G	T	T				A	G	A	G	C	T	T		G
HAP1a	IRIS 313-8884	E WAWNG::IRGC 71140-1::[IRIS 313-8884]	IRGC 126134	subtrop		sd1	SNPseek				C	A	T	G	C	G	A	G	C	A		C	G	G	T	C	C	C	G	G	C	T		T	G	T	T				A	G	A	G	C	T	T		G
HAP1a	IRIS 313-8960	BLUEBONNET::IRGC 1799-1::[IRIS 313-8960]	IRGC 125688	trop			SNPseek				C	A	T	G	C	G	A	G	C	A		C	G	G	T	C	C	C	G	G	C	T		T	G	T	T				A	G	A	G	C	T	T		G
HAP1a	IRIS 313-9129	LAYANDABU::IRGC 25214-1::[IRIS 313-9129]	IRGC 125820	trop			SNPseek				C	A	T	G	C	G	A	G	C	A		C	G	G	T	C	C	C	G	G	C	T		T	G	T	T				A	G	A	G	C	T	T		G
HAP1a	IRIS 313-9176	ARC 11359::IRGC 21348-1::[IRIS 313-9176]	IRGC 125639	japx			SNPseek				C	A	T	G	C	G	A	G	C	A		C	G	G	T	C	C	C	G	G	C	T		T	G	T	T				A	G	A	G	C	T	T		G
HAP1a	IRIS 313-9366	IMPROVED BLUE ROSE::IRGC 5022-1::[IRIS 313-9366]	IRGC 125771	japx			SNPseek				C	A	T	G	C	G	A	G	C	A		C	G	G	T	C	C	C	G	G	C	T		T	G	T	T				A	G	A	G	C	T	T		G
HAP1a	IRIS 313-9389	KINANDANG BUSIKSIK::IRGC 74607-1::[IRIS 313-9389]	IRGC 126982	trop			SNPseek				C	A	T	G	C	G	A	G	C	A		C	G	G	T	C	C	C	G	G	C	T		T	G	T	T				A	G	A	G	C	T	T		G
HAP1a	IRIS 313-9405	INGSA BELANAK::IRGC 43402-1::[IRIS 313-9405]	IRGC 126059	trop			SNPseek				C	A	T	G	C	G	A	G	C	A		C	G	G	T	C	C	C	G	G	C	T		T	G	T	T				A	G	A	G	C	T	T		G
HAP1a	IRIS 313-9452	B 505 A 1-28-7-1-2::IRGC 6741-1::[IRIS 313-9452]	IRGC 125661	trop			SNPseek				C	A	T	G	C	G	A	G	C	A		C	G	G	T	C	C	C	G	G	C	T		T	G	T	T				A	G	A	G	C	T	T		G
HAP1a	IRIS 313-9491	BLUE BELLE::IRGC 51125-1::[IRIS 313-9491]	IRGC 125685	trop			SNPseek				C	A	T	G	C	G	A	G	C	A		C	G	G	T	C	C	C	G	G	C	T		T	G	T	T				A	G	A	G	C	T	T		G
HAP1a	IRIS 313-9529	DAGPA BARA::IRGC 64887-1::[IRIS 313-9529]	IRGC 125720	subtrop			SNPseek				C	A	T	G	C	G	A	G	C	A		C	G	G	T	C	C	C	G	G	C				G	T	T				A	G	A	G	C	T	T		G
HAP1a	IRIS 313-9539	TEXAS PATNA 49::IRGC 6077-1::[IRIS 313-9539]	IRGC 125920	temp			SNPseek				C	A	T	G	C	G	A	G		A		C	G	G	T	C	C	C	G	G	C	T		T	G	T	T				A	G	A	G	C	T	T		G
HAP1a	IRIS 313-9550	VEGOLD::IRGC 7756-1::[IRIS 313-9550]	IRGC 125932	trop			SNPseek				C	A	T	G	C	G	A	G	C	A		C	G	G	T	C	C	C	G	G	C	T		T	G	T	T				A	G	A	G	C	T	T		G
HAP1a	IRIS 313-9691	SIFARASI::IRGC 66644-1::[IRIS 313-9691]	IRGC 126311	trop			SNPseek				C	A	T	G	C	G	A	G	C	A		C	G	G	T	C	C	C	G	G	C	T		T	G	T	T				A	G	A	G	C	T	T		G
HAP1a	IRIS 313-9897	BIKYAT::IRGC 26276-1::[IRIS 313-9897]	IRGC 125682	trop			SNPseek				C	A	T	G	C	G	A	G	C	A		C	G	G	T	C	C	C	G	G	C	T		T	G	T	T				A	G	A	G	C	T	T		G
HAP1a	IRIS 313-9980	FORTUNA INIA::IRGC 55865-1::[IRIS 313-9980]	IRGC 125741	japx			SNPseek				C	A	T	G	C	G	A	G	C	A		C	G	G	T	C	C	C	G	G	C	T		T	G	T	T				A	G	A	G	C	T	T		G
HAP1a	IRIS 313-10062	REA::IRGC 73031-1::[IRIS 313-10062]	IRGC 126141	trop			SNPseek				C	A	T	G	C	G	A	G	C	A		C	G	G	T	C	C	C	G	G	C	T		T	G	T	T				A	G	A	G	C	T	T		G
HAP1a	IRIS 313-10096	JOKJEBICHAL::IRGC 77663-1::[IRIS 313-10096]	IRGC 125787	japx			SNPseek				C	A	T	G	C	G	A	G	C	A		C	G	G	T	C	C	C	G	G	C	T		T	G	T	T				A	G	A	G	C	T	T		G
HAP1a	IRIS 313-10124	GALSAEGSSAL SHAREI::IRGC 82881-1::[IRIS 313-10124]		temp			SNPseek				C	A	T	G	C	G	A	G	C	A		C	G	G	T	C	C	C	G	G	C	T		T	G	T	T				A	G	A	G	C	T	T		G
HAP1a	IRIS 313-10176	NAM ROO::IRGC 66996-1::[IRIS 313-10176]	IRGC 125848	subtrop			SNPseek				C	A	T	G	C	G	A	G	C	A		C	G	G	T	C	C	C	G	G	C	T		T	G	T	T				A	G	A	G	C	T	T		G
HAP1a	IRIS 313-10228	HAN NUO::IRGC 82350-1::[IRIS 313-10228]	IRGC 125758	temp			SNPseek				C	A	T	G	C	G	A	G	C	A		C	G	G	T	C	C	C	G	G	C	T		T	G	T	T				A	G	A	G	C	T	T		G
HAP1a	IRIS 313-8436	PIKTO MAMAS::IRGC 18487-1::[IRIS 313-8436]	IRGC 126307	trop			SNPseek				C	A	T	G	C	G	A	G	C	A		C	G	G	T	C	C	C	G	G	C	T		T	G	T					A	G	A	G	C	T	T		G
HAP1a	IRIS 313-8565	YAHNG LEU::IRGC 78279-1::[IRIS 313-8565]	IRGC 126316	subtrop			SNPseek				C	A	T	G	C	G	A	G	C	A		C	G	G	T	C	C	C	G	G	C	T		T	G	T	T				A	G	A	G	C	T	T		G
HAP1a	IRIS 313-8572	ONOY::IRGC 55418-1::[IRIS 313-8572]	IRGC 126037	trop			SNPseek				C	A	T	G	C	G	A	G	C	A		C	G	G	T	C	C	C	G	G	C	T		T	G	T	T				A	G	A	G	C	T	T		G
HAP1a	IRIS 313-8599	BUE GA WA::IRGC 60824-1::[IRIS 313-8599]	IRGC 127041	subtrop			SNPseek				C	A	T	G	C	G	A	G	C	A		C	G	G	T	C	C	C	G	G	C	T		T	G	T	T				A	G	A	G	C	T	T		G
HAP1a	IRIS 313-8627	PRELUDE::IRGC 1790-1::[IRIS 313-8627]	IRGC 126260	trop			SNPseek				C	A	T	G	C	G	A	G	C	A		C	G	G	T	C	C	C	G	G	C	T		T	G	T	T				A	G	A	G	C	T	T		G
HAP1a	IRIS 313-8658	CP 231::IRGC 34018-1::[IRIS 313-8658]	IRGC 126195	japx			SNPseek				C	A	T	G	C	G	A	G	C	A		C	G	G	T	C	C	C	G	G	C	T		T	G	T	T				A	G	A	G	C	T	T		G
HAP1a	IRIS 313-8690	NEP HOA VANG::[IRIS 313-8690]	IRGC 117537	japx			SNPseek				C	A	T	G	C	G	A	G	C	A		C	G	G	T	C	C	C	G	G	C	T		T	G	T	T				A	G	A	G	C	T	T		G
HAP1a	IRIS 313-8694	TRES MESES::IRGC 6464-1::[IRIS 313-8694]	IRGC 126010	trop			SNPseek				C	A	T	G	C	G	A	G	C	A		C	G	G	T	C	C	C	G	G	C	T		T	G	T	T				A	G	A	G	C	T	T		G
HAP1a	IRIS 313-8803	TEXAS PATNA::IRGC 1797-1::[IRIS 313-8803]	IRGC 126283	trop			SNPseek				C	A	T	G	C	G	A	G	C	A		C	G	G	T	C	C	C	G	G	C	T		T	G	T	T				A	G	A	G	C	T	T		G
HAP1a	IRIS 313-8998	SIGAE::IRGC 66645-1::[IRIS 313-8998]		trop			SNPseek				C	A	T	G	C	G	A	G	C	A		C	G	G	T	C	C	C	G	G	C	T		T	G	T	T				A	G	A	G	C	T	T		G
HAP1a	IRIS 313-9470	SAHULO FACHE SOYO::IRGC 66630-1::[IRIS 313-9470]	IRGC 126310	trop			SNPseek				C	A	T	G	C	G	A	G	C	A		C	G	G	T	C	C	C	G	G	C	T		T	G	T	T				A	G	A	G	C	T	T		G
HAP1a	IRIS 313-9929	GOBYERNO::IRGC 47216-1::[IRIS 313-9929]	IRGC 127048	trop			SNPseek				C	A	T	G	C	G	A	G	C	A		C	G	G	T	C	C	C	G	G	C	T		T	G	T	T				A	G	A	G	C	T	T		G
HAP1a	IRIS 313-8431	BOCAO::IRGC 50384-1::[IRIS 313-8431]	IRGC 127071	trop			SNPseek				C	A	T	G	C	G	A	G	C	A		C	G	G	T	C	C	C	G	G	C	T		T	G	T	T				A	G	A	G	C	T	T		G
HAP1a	IRIS 313-8580	DAM::IRGC 23710-1::[IRIS 313-8580]	IRGC 126197	subtrop			SNPseek				C	A	T	G	C	G	A	G	C	A		C	G	G	T	C	C	C	G	G	C	T		T	G	T	T				A	G	A	G	C	T	T		G
HAP1a	IRIS 313-8637	BALINGMI::IRGC 62156-1::[IRIS 313-8637]	IRGC 126179	subtrop			SNPseek				C	A	T	G	C	G	A	G	C	A		C	G	G	T	C	C	C	G	G	C	T		T	G	T	T				A	G	A	G	C	T	T		G
HAP1a	IRIS 313-8687	KEREN FENHO::IRGC 56735-1::[IRIS 313-8687]	IRGC 126329	trop			SNPseek				C	A	T	G	C	G	A	G	C	A		C	G	G	T	C	C	C	G	G	C	T		T	G	T	T				A	G	A	G	C	T	T		G
HAP1a	IRIS 313-10327	CAROLINO BLANCO::IRGC 117249-1::[IRIS 313-10327]	IRGC 127042	trop			SNPseek				C	A	T	G	C	G	A	G	C	A		C	G	G	T	C	C	C	G	G	C	T		T	G	T	T				A	G	A	G	C	T	T		G
HAP1a	IRIS 313-8205	SALVO::GERVEX 1672-C1::[IRIS 313-8205]	IRGC 122237	japx			SNPseek				C	A	T	G	C	G	A	G	C	A		C	G	G	T	C	C	C	G	G	C	T		T	G	T	T				A	G	A	G	C	T	T		G
HAP1a	IRIS 313-8134	S 102/2::GERVEX 1251-C1::[IRIS 313-8134]	IRGC 121816	temp			SNPseek				C	A	T	G	C	G	A	G	C	A		C	G	G	T	C	C	C	G	G	C	T		T	G	T	T				A	G	A	G	C	T	T		G
HAP1a	IRIS 313-8026	GIOVANNI MARCHETTI::GERVEX 62-C1::[IRIS 313-8026]	IRGC 122056	temp			SNPseek				C	A	T	G	C	G	A	G	C	A		C	G	G	T	C	C	C	G	G	C	T		T	G	T	T				A	G	A	G	C	T	T		G
HAP1a	IRIS 313-8114	FAISCA::GERVEX 900-C1::[IRIS 313-8114]	IRGC 122045	temp			SNPseek				C	A	T	G	C	G	A	G	C	A		C	G	G	T	C	C	C	G	G	C	T		T	G	T	T				A	G	A	G	C	T	T		G
HAP1a	IRIS 313-8029	GRITNA::GERVEX 71-C1::[IRIS 313-8029]	IRGC 122073	japx			SNPseek				C	A	T	G	C	G	A	G	C	A		C	G	G	T	C	C	C	G	G	C	T		T	G	T	T				A	G	A	G	C	T	T		G
HAP1a	IRIS 313-8113	ESCARLATE::GERVEX 887-C1::[IRIS 313-8113]	IRGC 122043	temp			SNPseek				C	A	T	G	C	G	A	G	C	A		C	G	G	T	C	C	C	G	G	C	T		T	G	T	T				A	G	A	G	C	T	T		G
HAP1a	IRIS 313-8195	LUXOR::GERVEX 1662-C1::[IRIS 313-8195]	IRGC 122153	japx			SNPseek				C	A	T	G	C	G	A	G	C	A		C	G	G	T	C	C	C	G	G	C	T		T	G	T	T				A	G	A	G	C	T	T		G
HAP1a	IRIS 313-8214	MELAS::GERVEX 1684-C1::[IRIS 313-8214]	IRGC 122167	japx			SNPseek				C	A	T	G	C	G	A	G	C	A		C	G	G	T	C	C	C	G	G	C	T		T	G	T	T				A	G	A	G	C	T	T		G
HAP1a	IRIS 313-8186	JACINTO::GERVEX 1653-C1::[IRIS 313-8186]	IRGC 122122	trop		sd1	SNPseek				C	A	T	G	C	G	A	G	C	A		C	G	G	T	C	C	C	G	G	C	T		T	G	T	T				A	G	A	G	C	T	T		G
HAP1a	IRIS 313-8109	CAMPINO::GERVEX 824-C1::[IRIS 313-8109]	IRGC 121996	temp			SNPseek				C	A	T	G	C	G	A	G	C	A		C	G	G	T	C	C	C	G	G	C	T		T	G	T	T				A	G	A	G	C	T	T		G
HAP1a	IRIS 313-8025	ITALPATNA 48::GERVEX 60-C1::[IRIS 313-8025]	IRGC 122121	temp			SNPseek				C	A	T	G	C	G	A	G	C	A		C	G	G	T	C	C	C	G	G	C	T		T	G	T	T				A	G	A	G	C	T	T		G
HAP1a	IRIS 313-8074	GOOLARAH::GERVEX 500-C1::[IRIS 313-8074]	IRGC 122067	trop			SNPseek				C	A	T	G	C	G	A	G	C	A		C	G	G	T	C	C	C	G	G	C	T		T	G	T	T				A	G	A	G	C	T	T		G
HAP1a	IRIS 313-8097	ULLAL::GERVEX 556-C1::[IRIS 313-8097]	IRGC 122271	temp		sd1	SNPseek				C	A	T	G	C	G	A	G	C	A		C	G	G	T	C	C	C	G	G	C	T		T	G	T	T				A	G	A	G	C	T	T		G
HAP1a	IRIS 313-8118	IBO 400::GERVEX 943-C1::[IRIS 313-8118]	IRGC 122085	temp			SNPseek				C	A	T	G	C	G	A	G	C	A		C	G	G	T	C	C	C	G	G	C	T		T	G	T	T				A	G	A	G	C	T	T		G
HAP1a	IRIS 313-8145	SUPER::GERVEX 1304-C1::[IRIS 313-8145]	IRGC 122257	temp			SNPseek				C	A	T	G	C	G	A	G	C	A		C	G	G	T	C	C	C	G	G	C	T		T	G	T	T				A	G	A	G	C	T	T		G
HAP1a	IRIS 313-8053	RUBIDIO::GERVEX 146-C1::[IRIS 313-8053]	IRGC 122228	japx			SNPseek				C	A	T	G	C	G	A	G	C	A		C	G	G	T	C	C	C	G	G	C	T		T	G	T	T				A	G	A	G	C	T	T		G
HAP1a	IRIS 313-8065	SAMBA::GERVEX 186-C1::[IRIS 313-8065]	IRGC 122238	trop			SNPseek				C	A	T	G	C	G	A	G	C	A		C	G	G	T	C	C	C	G	G	C	T		T	G	T	T				A	G	A	G	C	T	T		G
HAP1a	IRIS 313-8124	OTA::GERVEX 1145-C1::[IRIS 313-8124]	IRGC 122187	japx			SNPseek				C	A	T	G	C	G	A	G	C	A		C	G	G	T	C	C	C	G	G	C	T		T	G		T				A	G	A	G	C	T	T		G
HAP1a	IRIS 313-8126	PLOVDIV 24::GERVEX 1168-C1::[IRIS 313-8126]	IRGC 122204	temp			SNPseek				C	A	T	G	C	G	A	G	C	A		C	G	G	T	C	C	C	G	G	C	T		T	G	T	T				A	G	A	G	C	T	T		G
HAP1a	IRIS 313-8141	SELN 244 A 6-20::GERVEX 1273-C1::[IRIS 313-8141]	IRGC 122244	temp			SNPseek				C	A	T	G		G	A	G	C	A		C	G	G	T	C	C	C	G	G	C	T		T	G	T	T				A	G	A	G	C	T	T		G
HAP1a	IRIS 313-8116	HAREM::GERVEX 929-C1::[IRIS 313-8116]	IRGC 122077	japx			SNPseek				C	A	T	G	C	G	A	G	C	A		C	G	G	T	C	C	C	G	G	C	T		T	G	T	T				A	G	A	G	C	T	T		G
HAP1a	IRIS 313-8216	ROXANI::GERVEX 1686-C1::[IRIS 313-8216]	IRGC 122222	temp			SNPseek				C	A	T	G	C	G	A	G	C	A		C	G	G	T	C	C	C	G	G	C	T		T	G	T	T				A	G	A	G	C	T	T		G
HAP1a	IRIS 313-8142	SETTANTUNO::GERVEX 1279-C1::[IRIS 313-8142]	IRGC 122249	temp			SNPseek				C	A	T	G	C	G	A	G	C	A		C	G	G	T	C	C	C	G	G	C	T		T	G	T	T				A	G	A	G	C	T	T		G
HAP1a	IRIS 313-8039	LOTO::GERVEX 104-C1::[IRIS 313-8039]	IRGC 122151	temp			SNPseek				C	A	T	G	C	G	A	G	C	A		C	G	G	T	C	C	C	G	G	C	T		T	G	T	T				A	G	A	G	C	T	T		G
HAP1a	IRIS 313-8111	CARRICO::GERVEX 828-C1::[IRIS 313-8111]	IRGC 122001	temp			SNPseek				C	A	T	G	C	G	A	G	C	A		C	G	G	T	C	C	C	G	G	C	T		T	G	T	T				A	G	A	G	C	T	T		G
HAP1a	IRIS 313-8085	CLOT::GERVEX 523-C1::[IRIS 313-8085]	IRGC 122016	temp			SNPseek				C	A	T	G	C	G	A	G	C	A		C	G	G	T	C	C	C	G	G	C	T		T	G	T	T				A	G	A	G	C	T	T		G
HAP1a	IRIS 313-8024	RIBE 253::GERVEX 54-C1::[IRIS 313-8024]	IRGC 122217	temp			SNPseek				C	A	T	G	C	G	A	G	C	A		C	G	G	T	C	C	C	G	G	C	T		T	G	T	T				A	G	A	G	C	T	T		G
HAP1a	IRIS 313-8052	SMERALDO::GERVEX 138-C1::[IRIS 313-8052]	IRGC 122253	temp			SNPseek				C	A	T	G	C	G	A	G	C	A		C	G	G	T	C	C	C	G	G	C	T		T	G	T	T				A	G	A	G	C	T	T		G
HAP1a	IRIS 313-8136	SAFARI::GERVEX 1256-C1::[IRIS 313-8136]	IRGC 121819	temp			SNPseek				C	A	T	G	C	G	A	G	C	A		C	G	G	T	C	C	C	G	G	C	T		T	G	T	T				A	G	A	G	C	T	T		G
HAP1a	IRIS 313-8095	SHSS 53::GERVEX 550-C1::[IRIS 313-8095]	IRGC 122251	temp			SNPseek				C	A	T	G	C	G	A	G	C	A		C	G	G	T	C	C	C	G	G	C	T		T	G	T	T				A	G	A	G	C	T	T		G
HAP1a	IRIS 313-8138	SALOIO::GERVEX 1259-C1::[IRIS 313-8138]	IRGC 122235	temp			SNPseek				C	A	T	G	C	G	A	G	C	A		C	G	G	T	C	C	C	G	G	C	T		T	G	T	T				A	G	A	G	C	T	T		G
HAP1a	IRIS 313-8076	PELDE::GERVEX 502-C1::[IRIS 313-8076]	IRGC 122198	trop			SNPseek				C	A	T	G	C	G	A	G	C	A		C	G	G	T	C	C	C	G	G	C	T		T	G	T	T				A	G	A	G	C	T	T		G
HAP1a	IRIS 313-8105	THAIPERLA::GERVEX 696-C1::[IRIS 313-8105]	IRGC 122265	temp			SNPseek				C	A	T	G	C	G	A	G	C	A		C	G	G	T	C	C	C	G	G	C	T		T	G	T	T				A	G	A	G	C	T	T		G
HAP1a	IRIS 313-8087	FRANCES::GERVEX 527-C1::[IRIS 313-8087]	IRGC 122051	temp			SNPseek				C	A	T	G	C	G	A	G	C	A		C	G	G	T	C	C	C	G	G	C	T		T	G	T	T				A	G	A	G	C	T	T		G
HAP1a	IRIS 313-8151	VALTEJO::GERVEX 1355-C1::[IRIS 313-8151]	IRGC 122273	temp			SNPseek				C	A	T	G	C	G	A	G	C	A		C	G	G	T	C	C	C	G	G	C	T		T	G	T	T				A	G	A	G	C	T	T		G
HAP1a	IRIS 313-8149	TOPAZIO::GERVEX 1332-C1::[IRIS 313-8149]	IRGC 122268	temp			SNPseek				C	A	T	G		G	A	G	C	A		C	G	G	T	C	C	C	G	G	C	T		T	G	T	T				A	G	A	G	C	T	T		G
HAP1a	IRIS 313-8032	PIEMONTE::GERVEX 81-C1::[IRIS 313-8032]	IRGC 122202	temp			SNPseek				C	A	T	G	C	G	A	G	C	A		C	G	G	T	C	C	C	G	G	C	T		T	G	T	T				A	G	A	G	C	T	T		G
HAP1a	IRIS 313-8066	GHIBLI::GERVEX 187-C1::[IRIS 313-8066]	IRGC 122053	temp			SNPseek				C	A	T	G	C	G	A	G	C	A		C	G	G	T	C	C	C	G	G	C	T		T	G	T	T				A	G	A	G	C	T	T		G
HAP1a	IRIS 313-8046	PLUS::GERVEX 122-C1::[IRIS 313-8046]	IRGC 122205	trop			SNPseek				C	A	T	G	C	G	A	G	C	A		C	G	G	T	C	C	C	G	G	C	T		T	G	T	T				A	G	A	G	C	T	T		G
HAP1a	IRIS 313-8049	LORD::GERVEX 127-C1::[IRIS 313-8049]	IRGC 122150	japx			SNPseek				C	A	T	G	C	G	A	G	C	A		C	G	G	T	C	C	C	G	G	C	T		T	G	T	T				A	G	A	G	C	T	T		G
HAP1a	IRIS 313-8129	RODINA::GERVEX 1234-C1::[IRIS 313-8129]	IRGC 122219	temp			SNPseek				C	A	T	G	C	G	A	G	C	A		C	G	G	T	C	C	C	G	G	C	T		T	G	T	T				A	G	A	G	C	T	T		G
HAP1a	IRIS 313-8123	MUGA::GERVEX 1099-C1::[IRIS 313-8123]	IRGC 122175	temp			SNPseek				C	A	T	G	C	G	A	G	C	A		C	G	G	T	C	C	C	G	G	C	T		T	G	T	T				A	G	A	G	C	T	T		G
HAP1a	IRIS 313-8050	MIARA::GERVEX 129-C1::[IRIS 313-8050]	IRGC 122170	temp			SNPseek				C	A	T	G	C	G	A	G	C	A		C	G	G	T	C	C	C	G	G	C	T		T	G	T	T				A	G	A	G	C	T	T		G
HAP1a	IRIS 313-8041	GRALDO::GERVEX 108-C1::[IRIS 313-8041]	IRGC 122071	japx			SNPseek				C	A	T	G	C	G	A	G	C	A		C	G	G	T	C	C	C	G	G	C	T		T	G	T	T				A	G	A	G	C	T	T		G
HAP1a	IRIS 313-8173	A 201::GERVEX 1638-C1::[IRIS 313-8173]	IRGC 121959	trop		sd1	SNPseek				C	A	T	G	C	G	A	G	C	A		C	G	G	T	C	C	C	G	G	C	T		T	G	T	T				A	G	A	G	C	T	T		G
HAP1a	IRIS 313-8148	TIMICH 108::GERVEX 1325-C1::[IRIS 313-8148]	IRGC 122267	temp			SNPseek				C	A	T	G	C	G	A	G	C	A		C	G	G	T	C	C	C	G	G	C	T		T	G	T	T				A	G	A	G	C	T	T		G
HAP1a	IRIS 313-8099	FLIPPER::GERVEX 597-C1::[IRIS 313-8099]	IRGC 122049	temp			SNPseek				C	A	T	G	C	G	A	G	C	A		C	G	G	T	C	C	C	G	G	C	T		T	G	T	T				A	G	A	G	C	T	T		G
HAP1a	IRIS 313-8135	SAEDINENIE::GERVEX 1255-C1::[IRIS 313-8135]	IRGC 121818	temp			SNPseek				C	A	T	G	C	G	A	G	C	A		C	G	G	T	C	C	C	G	G	C	T		T	G	T	T				A	G	A	G	C	T	T		G
HAP1a	IRIS 313-8090	MARENY::GERVEX 535-C1::[IRIS 313-8090]	IRGC 122162	temp			SNPseek				C	A	T	G	C	G	A	G	C	A		C	G	G	T	C	C	C	G	G	C	T		T	G	T	T				A	G	A	G	C	T	T		G
HAP1a	IRIS 313-8204	S 102::GERVEX 1671-C1::[IRIS 313-8204]	IRGC 121817	temp			SNPseek				C	A	T	G	C	G	A	G	C	A		C	G	G	T	C	C	C	G	G	C	T		T	G	T	T				A	G	A	G	C	T	T		G
HAP1a	IRIS 313-8031	RUBINO::GERVEX 80-C1::[IRIS 313-8031]	IRGC 122230	japx			SNPseek				C	A	T	G	C	G	A	G	C	A		C	G	G	T	C	C	C	G	G	C	T		T	G	T	T				A	G	A	G	C	T	T		G
HAP1a	IRIS 313-8119	JUBILIENI::GERVEX 992-C1::[IRIS 313-8119]	IRGC 122126	temp			SNPseek				C	A	T	G	C	G	A	G	C	A		C	G	G	T	C	C	C	G	G	C	T		T	G	T	T				A	G	A	G	C	T	T		G
HAP1a	IRIS 313-8044	GOLFO::GERVEX 118-C1::[IRIS 313-8044]	IRGC 122065	trop		sd1	SNPseek				C	A	T	G	C	G	A	G	C	A		C	G	G	T	C	C	C	G	G	C	T		T	G	T	T				A	G	A	G	C	T	T		G
HAP1a	IRIS 313-8084	CAPATAZ::GERVEX 521-C1::[IRIS 313-8084]	IRGC 121998	temp			SNPseek				C	A	T	G	C	G	A	G	C	A		C	G	G	T	C	C	C	G	G	C	T		T	G	T	T				A	G	A	G	C	T	T		G
HAP1a	IRIS 313-8171	AUZGUSTA::GERVEX 1634-C1::[IRIS 313-8171]	IRGC 121972	temp			SNPseek				C	A	T	G	C	G	A	G	C	A		C	G	G	T	C	C	C	G	G	C	T		T	G	T	T				A	G	A	G	C	T	T		G
HAP1a	IRIS 313-8180	DELLMONT::GERVEX 1647-C1::[IRIS 313-8180]	IRGC 122035	trop		sd1	SNPseek				C	A	T	G	C	G	A	G	C	A		C	G	G	T	C	C	C	G	G	C	T		T	G	T	T				A	G	A	G	C	T	T		G
HAP1a	IRIS 313-8048	RONCOLO::GERVEX 124-C1::[IRIS 313-8048]	IRGC 122221	japx			SNPseek				C	A	T	G	C	G	A	G	C	A		C	G	G	T	C	C	C	G	G	C	T		T	G	T	T				A	G	A	G	C	T	T		G
HAP1a	IRIS 313-8075	HARRA::GERVEX 501-C1::[IRIS 313-8075]	IRGC 122078	temp			SNPseek				C	A	T	G	C	G	A	G	C	A		C	G	G	T	C	C	C	G	G	C	T		T	G	T	T				A	G	A	G	C	T	T		G
HAP1a	IRIS 313-8072	CENTURY PATNA::GERVEX 477-C1::[IRIS 313-8072]	IRGC 122002	trop			SNPseek				C	A	T	G	C	G	A	G	C	A		C	G	G	T	C	C	C	G	G	C	T		T	G	T	T				A	G	A	G	C	T	T		G
HAP1a	IRIS 313-8183	DREW::GERVEX 1650-C1::[IRIS 313-8183]	IRGC 122304	trop			SNPseek				C	A	T	G	C	G	A	G	C	A		C	G	G	T	C	C	C	G	G	C	T		T	G	T	T				A	G	A	G	C	T	T		G
HAP1a	IRIS 313-8154	GIGANTE VERCELLI::GERVEX 1408-C1::[IRIS 313-8154]	IRGC 122055	japx			SNPseek				C	A	T	G	C	G	A	G	C	A		C	G	G	T	C	C	C	G	G	C	T		T	G	T	T				A	G	A	G	C	T	T		G
HAP1a	IRIS 313-8208	LUSITO IRRADIADO 859-85-2::GERVEX 1676-C1::[IRIS 313-8208]	IRGC 122152	temp			SNPseek				C	A	T	G	C	G	A	G	C	A		C	G	G	T	C	C	C	G	G	C	T		T	G	T	T				A	G	A	G	C	T	T		G
HAP1a	IRIS 313-8177	AUGUSTO::GERVEX 1643-C1::[IRIS 313-8177]	IRGC 121971	japx			SNPseek				C	A	T	G	C	G	A	G	C	A		C	G	G	T	C	C	C	G	G	C	T		T	G	T	T				A	G	A	G	C	T	T		G
HAP1a	IRIS 313-8112	CHIPKA::GERVEX 837-C1::[IRIS 313-8112]	IRGC 122007	temp			SNPseek				C	A	T	G	C	G	A	G	C	A		C	G	G	T	C	C	C	G	G	C	T		T	G	T	T				A	G	A	G	C	T	T		G
HAP1a	IRIS 313-8115	FAMILIA 181::GERVEX 901-C1::[IRIS 313-8115]	IRGC 122046	japx			SNPseek				C	A	T	G	C	G	A	G	C	A		C	G	G	T	C	C	C	G	G	C	T		T	G	T	T				A	G	A	G	C	T	T		G
HAP1a	IRIS 313-8096	SR 113::GERVEX 553-C1::[IRIS 313-8096]	IRGC 122256	temp			SNPseek				C	A	T	G	C	G		G	C	A		C	G	G	T	C	C	C	G	G	C	T		T	G	T	T				A	G	A	G	C	T	T		G
HAP1a	IRIS 313-8192	L 205::GERVEX 1659-C1::[IRIS 313-8192]	IRGC 122144	trop		sd1	SNPseek				C	A	T	G	C	G	A	G	C	A		C	G	G	T	C	C	C	G	G	C	T		T	G	T	T				A	G	A	G	C	T	T		G
HAP1a	IRIS 313-8139	SANDOCA::GERVEX 1262-C1::[IRIS 313-8139]	IRGC 122240	japx			SNPseek				C	A	T	G	C	G	A	G	C	A		C	G	G	T	C	C	C	G	G	C	T		T	G	T	T				A	G	A	G	C	T	T		G
HAP1a	IRIS 313-8102	BLUE BONNET::GERVEX 669-C1::[IRIS 313-8102]	IRGC 121984	trop			SNPseek				C	A	T	G	C	G	A	G	C	A		C	G	G	T	C	C	C	G	G	C	T		T	G	T	T				A	G	A	G	C	T	T		G
HAP1a	IRIS 313-8033	LOMELLINO::GERVEX 83-C1::[IRIS 313-8033]	IRGC 122149	temp			SNPseek				C	A	T	G	C	G	A	G	C	A		C	G	G	T	C	C	C	G	G	C	T		T	G	T	T				A	G	A	G	C	T	T		G
HAP1a	IRIS 313-8125	PLOVDIV 22::GERVEX 1167-C1::[IRIS 313-8125]	IRGC 122203	temp			SNPseek				C	A	T	G	C	G	A	G	C	A		C	G	G	T	C	C	C	G	G	C	T		T	G	T	T				A	G	A	G	C	T	T		G
HAP1a	IRIS 313-8023	RIZZOTTO 51/1::GERVEX 50-C1::[IRIS 313-8023]	IRGC 122218	japx			SNPseek				C	A	T	G	C	G	A	G	C	A		C	G	G	T	C	C	C	G	G	C	T		T	G	T	T				A	G	A	G	C	T	T		G
HAP1a	IRIS 313-8132	RUBI::GERVEX 1247-C1::[IRIS 313-8132]	IRGC 122229	temp			SNPseek				C	A	T	G	C	G	A	G	C	A		C	G	G	T	C	C	C	G	G	C	T		T	G						A	G	A	G	C	T	T		G
HAP1a	IRIS 313-8193	LACASSINE::GERVEX 1660-C1::[IRIS 313-8193]	IRGC 122146	trop		sd1	SNPseek				C	A	T	G	C	G	A	G	C	A		C	G	G	T	C	C	C	G	G	C	T		T	G	T	T				A	G	A	G	C	T	T		G
HAP1a	IRIS 313-8164	YRM 6-2::GERVEX 1508-C1::[IRIS 313-8164]	IRGC 122300	temp		sd1	SNPseek				C	A	T	G	C	G	A	G	C	A		C	G	G	T	C	C	C	G	G	C	T		T	G	T	T				A	G	A	G	C	T	T		G
HAP1a	IRIS 313-8202	REXMONT::GERVEX 1669-C1::[IRIS 313-8202]	IRGC 122216	trop		sd1	SNPseek				C	A	T	G	C	G	A	G	C	A		C	G	G	T	C	C	C	G	G	C	T		T	G	T	T				A	G	A	G	C	T	T		G
HAP1a	IRIS 313-8143	SLAVA::GERVEX 1287-C1::[IRIS 313-8143]	IRGC 122252	japx			SNPseek				C	A	T	G	C	G	A	G	C	A		C	G	G	T	C	C	C	G	G	C	T		T	G	T	T				A	G	A	G	C	T	T		G
HAP1a	IRIS 313-8155	KULON::GERVEX 1473-C1::[IRIS 313-8155]	IRGC 122142	japx			SNPseek				C	A	T	G	C	G	A	G	C	A		C	G	G	T	C	C	C	G	G	C	T		T	G	T	T				A	G	A	G	C	T	T		G
HAP1a	IRIS 313-8037	DORELLA::GERVEX 100-C1::[IRIS 313-8037]	IRGC 122037	japx			SNPseek				C	A	T	G	C	G	A	G	C	A		C	G	G	T	C	C	C	G	G	C	T		T	G	T	T				A	G	A	G	C	T	T		G
HAP1a	IRIS 313-8185	GLADIO::GERVEX 1652-C1::[IRIS 313-8185]	IRGC 122061	trop		sd1	SNPseek				C	A	T	G	C	G	A	G	C	A		C	G	G	T	C	C	C	G	G	C	T		T	G	T	T				A	G	A	G	C	T	T		G
HAP1a	IRIS 313-7922	IRAT 234::C1::[IRIS 313-7922]	IRGC 122119	trop			SNPseek				C	A	T	G	C	G	A	G	C	A		C	G	G	T	C	C	C	G	G	C	T		T	G	T	T				A	G	A	G	C	T	T		G
HAP1a	IRIS 313-7838	62667::C1::[IRIS 313-7838]	IRGC 121949	trop			SNPseek				C	A	T	G	C	G	A	G	C	A		C	G	G	T	C	C	C	G	G	C	T		T	G	T	T				A	G	A	G	C	T	T		G
HAP1a	IRIS 313-7907	IR 68704-145-1-1-B::C1::[IRIS 313-7907]	IRGC 122108	trop			SNPseek				C	A	T	G	C	G	A	G	C	A		C	G	G	T	C	C	C	G	G	C	T		T	G	T	T				A	G	A	G		T	T		G
HAP1a	IRIS 313-8011	VIETNAM 1::C1::[IRIS 313-8011]	IRGC 122281	subtrop			SNPseek				C	A	T	G	C	G	A	G	C	A		C	G	G	T	C	C	C	G	G	C	T		T	G	T	T				A	G	A	G	C	T	T		G
HAP1a	IRIS 313-7883	GANIGI::IRGC 48698-C1::[IRIS 313-7883]	IRGC 122052	trop			SNPseek				C	A	T	G	C	G	A	G	C	A		C	G	G	T	C	C	C		G	C	T		T	G	T	T				A	G	A	G	C	T	T		G
HAP1a	IRIS 313-7863	CIRAD 403::GERVEX 9039-C1::[IRIS 313-7863]	IRGC 122014	trop			SNPseek				C	A	T	G	C	G	A	G	C	A		C	G	G	T	C	C	C	G	G	C	T		T	G	T	T				A	G	A	G	C	T	T		G
HAP1a	IRIS 313-7876	DINORADO::IRTP 12568-C1::[IRIS 313-7876]		trop			SNPseek				C	A	T	G	C	G	A	G	C	A		C	G	G	T	C	C	C	G	G	C	T		T	G	T	T				A	G	A	G	C	T	T		G
HAP1a	IRIS 313-7914	IRAT 112::C1::[IRIS 313-7914]	IRGC 122115	trop			SNPseek				C	A	T	G	C	G	A	G	C	A		C	G	G	T	C	C	C	G	G	C	T		T	G	T	T				A	G	A	G	C	T	T		G
HAP1a	IRIS 313-7993	VARY LAVA DE BETAFO::GERVEX 8381-C1::[IRIS 313-7993]	IRGC 122276	trop			SNPseek				C	A	T	G	C	G	A	G	C	A		C	G	G	T	C	C	C	G	G	C	T		T	G	T	T				A	G	A	G	C	T	T		G
HAP1a	IRIS 313-7933	KAKANI 2::IRGC 13373-C1::[IRIS 313-7933]	IRGC 122128	admix			SNPseek				C	A	T	G	C	G	A	G	C	A		C	G	G	T	C	C	C	G	G	C	T		T		T	T				A	G	A	G	C	T	T		G
HAP1a	IRIS 313-7912	IRAT 104::C1::[IRIS 313-7912]	IRGC 122114	trop			SNPseek				C	A	T		C	G	A	G	C	A		C	G	G	T	C	C	C	G	G	C	T		T	G	T	T				A	G	A	G	C	T	T		G
HAP1a	IRIS 313-7850	BODA 148-3::GERVEX 8258-C1::[IRIS 313-7850]	IRGC 121985	trop			SNPseek				C	A	T	G	C	G	A	G	C	A		C	G	G	T	C	C	C	G	G	C	T		T	G	T	T				A	G	A	G	C	T	T		G
HAP1a	IRIS 313-7902	IR 63380-16::C1::[IRIS 313-7902]	IRGC 122101	trop			SNPseek				C	A	T	G	C	G	A	G	C	A		C	G	G	T	C	C	C	G	G	C	T		T	G	T	T				A	G	A	G	C	T	T		G
HAP1a	IRIS 313-8010	IR 71524-44-1-1::C1::[IRIS 313-8010]	IRGC 122109	trop			SNPseek				C	A	T	G	C	G	A	G	C	A		C	G	G	T	C	C	C	G	G	C	T		T	G	T	T				A	G	A	G	C	T	T		G
HAP1a	IRIS 313-7994	VARY MADINIKA 3566::GERVEX 8448-C1::[IRIS 313-7994]	IRGC 122277	trop			SNPseek				C	A	T	G	C	G	A	G	C	A		C	G	G	T	C	C	C	G	G	C	T		T	G	T	T				A	G	A	G	C	T	T		G
HAP1a	IRIS 313-7909	IR 71525-19-1-1::C1::[IRIS 313-7909]	IRGC 122110	trop			SNPseek				C	A	T	G	C	G	A	G	C	A		C	G	G	T	C	C	C	G	G	C	T		T	G	T	T				A	G	A	G	C	T	T		G
HAP1a	IRIS 313-8063	104 UPLA::GERVEX 167-C1::[IRIS 313-8063]	IRGC 121947	trop			SNPseek				C	A	T	G	C	G	A	G	C	A		C	G	G	T	C	C	C	G	G	C	T		T	G	T	T				A	G	A	G	C	T	T		G
HAP1a	IRIS 313-8064	32 UPLA::GERVEX 176-C1::[IRIS 313-8064]	IRGC 121948	trop			SNPseek				C	A	T	G	C	G	A	G	C	A		C	G	G	T	C	C	C	G	G	C	T		T	G	T	T				A	G	A	G	C	T	T		G
HAP1a	IRIS 313-8061	75 UPLA::GERVEX 161-C1::[IRIS 313-8061]	IRGC 121954	trop			SNPseek				C	A	T	G	C	G	A	G	C	A		C	G	G	T	C	C	C	G	G	C	T		T	G	T	T				A	G	A	G	C	T	T		G
HAP1a	IRIS 313-8057	79 UPLA::GERVEX 154-C1::[IRIS 313-8057]	IRGC 121956	trop			SNPseek				C	A	T	G	C	G	A	G	C	A		C	G	G	T	C	C	C	G	G	C	T		T	G	T	T				A	G	A	G	C	T	T		G
HAP1a	IRIS 313-8062	80 UPLA::GERVEX 164-C1::[IRIS 313-8062]	IRGC 121957	trop			SNPseek				C	A	T	G	C	G	A	G	C	A		C	G	G	T	C	C	C	G	G	C	T		T	G	T	T				A	G	A	G	C	T	T		G
HAP1a	IRIS 313-8058	91 UPLA::GERVEX 155-C1::[IRIS 313-8058]	IRGC 121958	trop			SNPseek				C	A	T	G	C	G	A	G	C	A		C	G	G	T	C	C	C	G		C	T		T	G	T	T				A	G	A	G	C	T	T		G
HAP1a	IRIS 313-8168	ARLESIENNE::GERVEX 1530-C1::[IRIS 313-8168]	IRGC 121968	japx			SNPseek				C	A	T	G	C	G	A	G	C	A		C	G	G	T	C	C	C	G	G	C	T		T	G	T	T				A	G	A	G	C	T	T		G
HAP1a	IRIS 313-8166	CALENDAL::GERVEX 1516-C1::[IRIS 313-8166]	IRGC 121995	japx			SNPseek				C	A	T	G	C	G	A	G	C	A		C	G	G	T	C	C	C	G	G	C	T		T	G	T	T				A	G	A	G	C	T	T		G
HAP1a	IRIS 313-8165	CIGALON::GERVEX 1514-C1::[IRIS 313-8165]	IRGC 122013	temp			SNPseek				C	A	T	G	C	G	A	G	C	A		C	G	G	T	C	C	C	G	G	C	T		T	G	T	T				A	G	A	G	C	T	T		G
HAP1a	IRIS 313-8158	CT 23::GERVEX 1488-C1::[IRIS 313-8158]	IRGC 122022	japx			SNPseek				C	A	T	G	C	G	A	G	C	A		C	G	G	T	C	C	C	G	G	C	T		T	G	T	T				A	G	A	G	C	T	T		G
HAP1a	IRIS 313-8159	CT 36::GERVEX 1489-C1::[IRIS 313-8159]	IRGC 122023	japx			SNPseek				C	A	T	G	C	G	A	G	C	A		C	G	G	T	C	C	C	G	G	C	T		T	G	T	T				A	G	A	G	C	T	T		G
HAP1a	IRIS 313-8167	DELTA::GERVEX 1519-C1::[IRIS 313-8167]	IRGC 122303	japx			SNPseek				C	A	T	G	C	G	A	G	C	A		C	G	G	T	C	C	C	G	G	C	T		T	G	T	T				A	G	A	G	C	T	T		G
HAP1a	IRIS 313-8172	FIDJI::GERVEX 1636-C1::[IRIS 313-8172]	IRGC 122048	admix		sd1	SNPseek				C	A	T	G	C	G	A	G	C	A		C	G	G	T	C	C	C	G	G	C	T		T	G	T	T				A	G	A	G	C	T	T		G
HAP1a	IRIS 313-8213	GRAAL::GERVEX 1682-C1::[IRIS 313-8213]	IRGC 122070	trop			SNPseek				C	A	T	G	C	G	A	G	C	A		C	G	G	T	C	C	C	G	G	C	T		T	G	T	T				A	G	A	G	C	T	T		G
HAP1a	IRIS 313-8170	MEJANES 2::GERVEX 1560-C1::[IRIS 313-8170]	IRGC 122166	japx			SNPseek				C	A	T	G	C	G	A	G	C	A		C	G	G	T	C	C	C	G	G	C	T		T	G	T	T				A	G	A	G	C	T	T		G
HAP1a	IRIS 313-11429	MIUDO ROXO::IRGC 50517-1::[IRIS 313-11429]	IRGC 128388	trop			SNPseek				C	A	T	G	C	G	A	G	C	A		C	G	G	T	C	C	C	G	G	C	T		T	G	T	T				A	G	A	G	C	T	T		G
HAP1a	IRIS 313-11434	FORTUNA BLANCO (SAN MARCOS)::IRGC 50764-1::[IRIS 313-11434]	IRGC 127370	trop			SNPseek				C	A	T	G	C	G	A	G	C	A		C	G	G	T	C	C	C	G	G	C	T		T	G	T	T				A	G	A	G	C	T	T		G
HAP1a	IRIS 313-11436	SAKAZELE (538)::IRGC 50880-1::[IRIS 313-11436]	IRGC 127779	trop			SNPseek				C	A	T	G	C	G	A	G		A		C	G	G	T	C	C	C	G	G	C	T		T	G	T	T				A	G	A	G	C	T	T		G
HAP1a	IRIS 313-11439	NIRA PRIETO::IRGC 51145-1::[IRIS 313-11439]	IRGC 127680	trop			SNPseek				C	A	T	G	C	G	A	G	C	A		C	G	G	T	C	C	C	G	G	C	T		T	G	T	T				A	G	A	G	C	T	T		G
HAP1a	IRIS 313-8128	PRECOZ 2 F A::GERVEX 1182-C1::[IRIS 313-8128]	IRGC 122208	temp			SNPseek				C	A	T	G	C	G	A	G	C	A		C	G	G	T	C	C	C	G	G	C	T		T	G	T	T				A	G	A	G	C	T	T		G
HAP1a	IRIS 313-8162	RPC 12::GERVEX 1505-C1::[IRIS 313-8162]	IRGC 122223	temp			SNPseek				C	A	T	G	C	G	A	G	C	A		C	G	G	T	C	C	C	G	G	C	T		T	G	T	T				A	G	A	G	C	T	T		G
HAP1a	IRIS 313-11465	DINORADO::IRGC 52893-1::[IRIS 313-11465]	IRGC 128280	trop			SNPseek				C	A	T	G	C	G	A	G	C	A		C	G	G	T	C	C	C	G	G	C	T		T	G	T	T				A	G	A	G	C	T	T		G
HAP1a	IRIS 313-8217	SAKHA 102::GERVEX 1687-C1::[IRIS 313-8217]	IRGC 122233	temp			SNPseek				C	A	T	G	C	G	A	G	C	A		C	G	G	T	C	C	C	G	G	C	T		T	G	T	T				A	G	A	G	C	T	T		G
HAP1a	IRIS 313-11473	KINTOMAN (TOD DOY)::IRGC 53146-1::[IRIS 313-11473]	IRGC 132004	trop			SNPseek				C	A	T	G	C	G	A	G	C	A		C	G	G	T	C	C	C	G	G	C	T		T	G	T	T				A	G	A	G	C	T	T		G
HAP1a	IRIS 313-8218	SAKHA 103::GERVEX 1688-C1::[IRIS 313-8218]	IRGC 122234	temp			SNPseek				C	A	T	G	C	G	A	G	C	A		C	G	G	T	C	C	C	G	G	C	T		T		T	T				A	G	A	G	C	T	T		G
HAP1a	IRIS 313-11479	VANKALI::IRGC 53339-1::[IRIS 313-11479]	IRGC 127882	trop			SNPseek				C	A	T	G	C	G	A	G	C	A		C	G	G	T	C	C	C	G	G	C	T		T	G	T	T				A	G	A	G	C	T	T		G
HAP1a	IRIS 313-8140	SANGHAI::GERVEX 1264-C1::[IRIS 313-8140]	IRGC 122241	temp			SNPseek				C	A	T	G	C	G	A	G	C	A		C	G	G	T	C	C	C	G	G	C	T		T	G	T	T				A	G	A	G	C	T	T		G
HAP1a	IRIS 313-11494	IC 25690::IRGC 53973-1::[IRIS 313-11494]	IRGC 128317	subtrop			SNPseek				C	A	T	G	C	G	A	G	C	A		C	G	G	T	C	C	C	G	G	C	T		T	G	T	T				A	G	A	G	C	T	T		G
HAP1a	IRIS 313-11495	ANENOE::IRGC 54140-1::[IRIS 313-11495]	IRGC 128217	trop			SNPseek				C	A	T	G	C	G	A	G	C	A		C	G	G	T	C	C	C	G	G	C	T		T	G	T	T				A	G	A	G	C	T	T		G
HAP1a	IRIS 313-11496	BALU PRIA::IRGC 54158-1::[IRIS 313-11496]	IRGC 131969	trop			SNPseek				C	A	T	G	C	G	A	G	C	A		C	G	G	T	C	C	C	G	G	C	T		T	G	T	T				A	G	A	G	C	T	T		G
HAP1a	IRIS 313-11498	PADI HEDENG (REKET HEDENG)::IRGC 54266-1::[IRIS 313-11498]	IRGC 132023	trop			SNPseek				C	A	T	G	C	G	A	G	C	A		C	G	G	T	C	C	C	G	G	C	T		T	G	T	T				A	G	A	G	C	T	T		G
HAP1a	IRIS 313-8147	T 757::GERVEX 1316-C1::[IRIS 313-8147]	IRGC 122259	temp			SNPseek				C	A	T	G	C	G	A	G	C	A		C	G	G	T	C	C	C	G	G	C	T		T	G	T	T				A	G	A	G	C	T	T		G
HAP1a	IRIS 313-11499	PADI UDANG::IRGC 54295-1::[IRIS 313-11499]	IRGC 132024	trop			SNPseek				C	A	T	G	C	G	A	G	C	A		C	G	G	T	C	C	C	G	G	C	T		T	G	T	T				A	G	A	G	C	T	T		G
HAP1a	IRIS 313-11428	MARANHAO BRANCO::IRGC 50503-1::[IRIS 313-11428]	IRGC 128382	trop			SNPseek				C	A	T	G	C	G	A	G	C	A		C	G	G	T	C	C	C	G	G	C	T		T	G	T	T				A	G	A	G	C	T	T		G
HAP1a	IRIS 313-11511	WAGASAN (RED)::IRGC 55404-1::[IRIS 313-11511]	IRGC 127890	trop			SNPseek				C	A	T	G	C	G	A	G	C	A		C	G	G	T	C	C	C	G	G	C	T		T	G	T					A	G	A	G	C	T	T		G
HAP1a	IRIS 313-11527	GOLO::IRGC 56856-1::[IRIS 313-11527]	IRGC 128302	trop			SNPseek				C	A	T	G	C	G	A	G	C	A		C	G	G	T	C	C	C	G	G	C	T		T	G						A	G	A	G	C	T	T		G
HAP1a	IRIS 313-11532	MARIA GAKIT::IRGC 57070-1::[IRIS 313-11532]	IRGC 132016	trop			SNPseek				C	A	T	G	C	G	A	G	C	A		C	G	G	T	C	C	C	G	G	C	T		T	G	T	T				A	G	A	G	C	T	T		G
HAP1a	IRIS 313-11536	WIR 2091::IRGC 57536-1::[IRIS 313-11536]	IRGC 128502	temp			SNPseek				C	A	T	G		G		G	C	A		C		G	T	C	C	C	G	G	C	T		T	G	T	T				A	G	A	G	C	T	T		G
HAP1a	IRIS 313-11539	SP 6 (WC 836)::IRGC 57602-1::[IRIS 313-11539]	IRGC 128475	trop			SNPseek				C	A	T	G	C	G	A	G	C	A		C	G	G	T	C	C	C	G	G	C	T		T	G	T	T				A	G	A	G	C	T	T		G
HAP1a	IRIS 313-11540	PATIE ROUGE::IRGC 57686-1::[IRIS 313-11540]	IRGC 128428	trop			SNPseek				C	A	T	G	C	G	A	G	C	A		C	G	G	T	C	C	C	G	G	C	T		T	G	T	T				A	G	A	G	C	T	T		G
HAP1a	IRIS 313-11571	BAI MANG AI ZHONG::IRGC 59408-1::[IRIS 313-11571]	IRGC 128235	temp			SNPseek				C	A	T	G	C	G	A	G	C	A		C	G	G	T	C		C	G	G	C	T		T	G	T	T				A	G	A	G	C	T	T		G
HAP1a	IRIS 313-11574	HEI TOU HONG::IRGC 59595-1::[IRIS 313-11574]	IRGC 128307	temp			SNPseek				C	A	T	G	C	G	A	G	C	A		C	G	G	T	C	C	C	G	G	C	T		T	G	T	T				A	G	A	G	C	T	T		G
HAP1a	IRIS 313-11575	HONG PI NUO::IRGC 59638-1::[IRIS 313-11575]	IRGC 127415	temp			SNPseek				C	A	T	G	C	G	A	G	C	A		C	G	G	T	C	C	C	G	G	C	T		T	G	T	T				A	G	A	G	C	T	T		G
HAP1a	IRIS 313-11578	LUAN DAO::IRGC 59762-1::[IRIS 313-11578]	IRGC 128370	temp			SNPseek				C	A	T	G	C	G	A	G	C	A		C	G	G	T	C	C	C	G	G	C	T		T	G	T	T				A	G	A	G	C	T	T		G
HAP1a	IRIS 313-11582	WAN GENG BAI DAO TOU::IRGC 59948-1::[IRIS 313-11582]	IRGC 128499	temp			SNPseek				C	A	T	G		G	A	G	C	A		C	G	G	T	C	C	C	G	G	C	T		T	G	T	T				A	G	A	G	C	T	T		G
HAP1a	IRIS 313-11584	YI SUI QI::IRGC 60088-1::[IRIS 313-11584]	IRGC 128508	temp			SNPseek				C	A	T	G	C	G	A	G	C	A		C	G	G	T	C	C	C	G	G	C	T			G		T				A	G	A	G	C	T	T		G
HAP1a	IRIS 313-11586	36037-1::IRGC 60177-2::[IRIS 313-11586]	IRGC 132313	temp			SNPseek				C	A	T	G	C	G	A	G	C	A		C	G	G	T	C	C	C	G	G	C	T		T	G	T	T					G	A	G	C	T	T		G
HAP1a	IRIS 313-11588	MR 69::IRGC 60188-1::[IRIS 313-11588]	IRGC 127636	ind3			SNPseek				C	A	T	G	C	G	A	G	C	A		C	G	G	T	C	C	C	G	G	C	T		T	G	T	T				A	G	A	G	C	T	T		G
HAP1a	IRIS 313-11623	KAO SONG HAI::IRGC 61827-1::[IRIS 313-11623]	IRGC 128332	subtrop			SNPseek				C	A	T	G	C	G	A	G	C	A		C	G	G	T	C	C	C	G	G	C	T		T	G	T	T				A	G	A	G	C	T	T		G
HAP1a	IRIS 313-11651	FEI ZHAO 12::IRGC 62683-1::[IRIS 313-11651]	IRGC 128291	temp			SNPseek				C	A	T	G	C	G	A	G	C	A		C	G	G	T	C	C	C	G	G	C	T		T	G	T	T				A	G	A	G	C	T	T		G
HAP1a	IRIS 313-11652	GONG SHE 9::IRGC 62693-1::[IRIS 313-11652]	IRGC 128303	temp			SNPseek				C	A	T	G	C	G	A	G	C	A		C	G	G	T	C	C	C	G	G	C	T		T	G	T	T				A	G	A	G	C	T	T		G
HAP1a	IRIS 313-11653	MA SHE 8::IRGC 62750-1::[IRIS 313-11653]	IRGC 128384	temp			SNPseek				C	A	T	G	C	G	A	G	C	A		C	G	G	T	C	C	C	G	G	C	T		T	G	T	T				A	G	A	G	C	T	T		G
HAP1a	IRIS 313-11654	PL 3165::IRGC 62827-1::[IRIS 313-11654]	IRGC 128434	temp			SNPseek				C	A	T	G	C	G	A	G	C	A		C	G	G	T	C	C	C	G	G	C	T		T	G	T	T				A	G	A	G	C	T	T		G
HAP1a	IRIS 313-11655	SI WAN 14::IRGC 63019-1::[IRIS 313-11655]	IRGC 127815	temp			SNPseek				C	A	T	G	C	G	A	G	C	A		C	G	G	T	C	C	C		G	C	T		T	G	T	T				A	G	A	G	C	T	T		G
HAP1a	IRIS 313-11658	MANYALOJOPOIHUN::IRGC 63350-1::[IRIS 313-11658]	IRGC 128381	trop			SNPseek				C	A	T	G	C	G	A	G	C	A		C	G	G	T	C	C	C	G	G	C	T		T	G	T	T				A	G	A	G	C	T	T		G
HAP1a	IRIS 313-11659	TOBOHUN::IRGC 63433-1::[IRIS 313-11659]	IRGC 132047	trop			SNPseek				C	A	T	G	C	G	A	G	C	A		C	G	G	T	C	C	C	G	G	C	T		T	G	T	T				A	G	A	G	C	T	T		G
HAP1a	IRIS 313-11660	WULE DASIMA::IRGC 63450-1::[IRIS 313-11660]	IRGC 128503	trop			SNPseek				C	A	T	G	C	G	A	G	C	A		C	G	G	T	C	C	C	G	G	C	T		T	G	T	T				A	G	A	G	C	T	T		G
HAP1a	IRIS 313-11661	91-382::IRGC 63464-1::[IRIS 313-11661]	IRGC 131960	temp			SNPseek				C	A	T	G	C	G	A	G	C	A		C	G	G	T	C	C	C	G	G	C	T		T	G	T	T				A	G	A	G	C	T	T		G
HAP1a	IRIS 313-11672	RAI MANULA::IRGC 64138-1::[IRIS 313-11672]	IRGC 128445	temp			SNPseek				C	A	T	G	C	G	A	G	C	A		C	G	G	T	C	C	C	G	G	C	T		T	G	T	T				A	G	A	G	C	T	T		G
HAP1a	IRIS 313-11673	BURI BURING::IRGC 64174-1::[IRIS 313-11673]	IRGC 128248	trop			SNPseek				C	A	T	G	C	G	A	G	C	A		C	G	G	T	C	C	C	G	G	C	T		T	G	T	T				A	G	A	G	C	T	T		G
HAP1a	IRIS 313-11689	DECHANGBYEO::IRGC 64858-1::[IRIS 313-11689]	IRGC 128275	temp			SNPseek				C	A	T	G	C	G	A	G	C	A		C	G	G	T	C	C	C	G	G	C	T		T	G	T	T				A	G	A	G	C	T	T		G
HAP1a	IRIS 313-11691	SHANGYIPA::IRGC 64928-1::[IRIS 313-11691]	IRGC 128467	subtrop			SNPseek				C	A	T	G	C	G	A	G	C	A		C	G	G	T	C	C	C	G	G	C	T		T	G	T	T				A	G	A	G	C	T	T		G
HAP1a	IRIS 313-11725	ZUIHOU::IRGC 66982-1::[IRIS 313-11725]	IRGC 128514	temp			SNPseek				C	A	T	G	C	G	A	G	C	A		C	G	G	T	C	C	C	G	G	C	T		T	G	T	T				A	G	A	G	C	T	T		G
HAP1a	IRIS 313-11736	MALAGKIT (PINELIPE)::IRGC 67444-1::[IRIS 313-11736]	IRGC 127595	trop			SNPseek				C	A	T	G	C	G	A	G	C	A		C	G	G	T	C	C	C	G	G	C	T		T	G	T	T				A	G	A	G	C	T	T		G
HAP1a	IRIS 313-11702	CN 1067::IRGC 65680-1::[IRIS 313-11702]	IRGC 127285	temp			SNPseek				C	A	T	G	C	G	A	G	C	A		C	G	G	T	C	C	C	G	G	C	T		T	G	T	T				A	G	A	G	C	T	T		G
HAP1a	IRIS 313-11739	NAKPUI::IRGC 67594-1::[IRIS 313-11739]	IRGC 128398	trop			SNPseek				C	A	T	G	C	G	A	G	C	A		C	G	G	T	C	C	C	G	G	C	T		T	G	T	T				A	G	A	G	C	T	T		G
HAP1a	IRIS 313-11755	A 2-257::IRGC 68342-1::[IRIS 313-11755]	IRGC 131961	trop			SNPseek				C	A	T	G	C	G	A	G	C	A		C	G	G	T	C	C	C	G	G	C	T		T	G	T	T				A	G	A	G	C	T	T		G
HAP1a	IRIS 313-11756	BENGALI VAKAHANA 1448::IRGC 68370-1::[IRIS 313-11756]	IRGC 131970	trop			SNPseek				C	A	T	G	C	G	A	G	C	A		C	G	G	T	C	C	C	G	G	C	T		T	G	T	T				A	G	A	G	C	T	T		G
HAP1a	IRIS 313-11788	CANLUBANG::IRGC 69816-1::[IRIS 313-11788]	IRGC 127247	japx			SNPseek				C	A	T	G	C	G	A	G	C	A		C	G	G	T	C	C	C	G	G	C	T		T	G	T	T				A	G	A	G	C	T	T		G
HAP1a	IRIS 313-11790	VARIRANGAHY::IRGC 69897-1::[IRIS 313-11790]	IRGC 127883	trop			SNPseek				C	A	T	G	C	G	A	G	C	A		C	G	G	T	C	C	C	G	G	C	T		T	G	T	T				A	G	A	G	C	T	T		G
HAP1a	IRIS 313-11803	MAO ZHA NUO::IRGC 70335-1::[IRIS 313-11803]	IRGC 127608	temp			SNPseek				C	A	T	G	C	G	A	G	C	A		C	G	G	T	C	C	C	G	G	C	T		T	G	T	T				A	G	A	G	C	T	T		G
HAP1a	IRIS 313-11829	MUNJI::IRGC 70928-1::[IRIS 313-11829]	IRGC 128396	temp			SNPseek				C	A	T	G	C	G	A	G	C	A		C	G	G	T	C	C	C	G	G	C	T		T	G	T	T				A	G	A	G	C	T	T		G
HAP1a	IRIS 313-11831	KHAO' DAENG HAWM::IRGC 71001-1::[IRIS 313-11831]	IRGC 131999	subtrop			SNPseek				C	A	T	G	C	G	A	G	C	A		C	G	G	T	C	C	C	G	G	C	T		T	G	T	T				A	G	A	G	C	T	T		G
HAP1a	IRIS 313-11832	AE WAWNG POO DOO::IRGC 71007-1::[IRIS 313-11832]	IRGC 131964	subtrop		sd1	SNPseek				C	A	T	G	C	G	A	G	C	A		C	G	G	T	C	C	C	G	G	C	T		T	G	T	T				A	G	A	G	C	T	T		G
HAP1a	IRIS 313-11834	BUENG MONG LENG WE::IRGC 71088-1::[IRIS 313-11834]	IRGC 128246	subtrop		sd1	SNPseek				C	A	T	G	C	G	A	G	C	A		C	G	G	T	C	C	C	G	G	C	T		T	G	T	T				A	G	A	G	C	T	T		G
HAP1a	IRIS 313-11845	SING SAI::IRGC 71442-2::[IRIS 313-11845]	IRGC 132369	subtrop		sd1	SNPseek				C	A	T	G	C	G	A	G	C	A		C	G	G	T	C	C	C	G	G	C	T		T	G	T	T				A	G	A	G	C	T	T		G
HAP1a	IRIS 313-11846	TON TIA GUAY NU::IRGC 71467-1::[IRIS 313-11846]	IRGC 132048	subtrop			SNPseek				C	A	T		C	G		G		A		C			T	C	C	C	G	G	C	T		T	G	T	T				A	G	A	G		T	T		G
HAP1a	IRIS 313-11851	DUNA AL::IRGC 71842-1::[IRIS 313-11851]	IRGC 135565	trop			SNPseek				C	A	T	G	C	G	A	G	C	A		C	G	G	T	C	C	C	G	G	C	T		T	G	T	T				A	G	A	G	C	T	T		G
HAP1a	IRIS 313-11875	CHUBU 17::IRGC 72505-1::[IRIS 313-11875]	IRGC 128262	temp			SNPseek				C	A	T	G	C	G	A	G	C	A		C	G	G	T	C	C	C	G	G	C	T		T	G	T	T				A	G	A	G	C	T	T		G
HAP1a	IRIS 313-11800	FAN GENG 6::IRGC 70243-1::[IRIS 313-11800]	IRGC 136098	temp			SNPseek				C	A	T	G	C	G	A	G	C	A		C	G	G	T	C	C	C	G	G	C	T		T	G	T	T				A	G	A	G	C	T	T		G
HAP1a	IRIS 313-11897	PHIT CHZK::IRGC 73317-1::[IRIS 313-11897]	IRGC 128431	subtrop			SNPseek				C	A	T	G	C	G	A	G	C	A		C	G	G	T	C	C	C	G	G	C	T		T	G	T	T				A	G	A	G	C	T	T		G
HAP1a	IRIS 313-11900	PLE LIA::IRGC 73562-1::[IRIS 313-11900]	IRGC 128435	subtrop			SNPseek				C	A	T	G	C	G	A	G	C	A		C	G	G	T	C	C	C	G	G	C	T		T	G	T	T				A	G	A	G	C	T	T		G
HAP1a	IRIS 313-11903	KOMPIT::IRGC 73716-1::[IRIS 313-11903]	IRGC 128351	trop			SNPseek				C	A	T	G	C	G	A	G	C	A		C	G	G	T	C	C	C	G	G	C	T		T	G	T	T				A	G	A	G	C	T	T		G
HAP1a	IRIS 313-11906	SULUS BALOK::IRGC 73862-1::[IRIS 313-11906]	IRGC 135582	trop			SNPseek				C	A	T	G	C	G	A	G	C	A		C	G	G	T	C	C	C	G	G	C	T		T	G	T	T				A	G	A	G	C	T	T		G
HAP1a	IRIS 313-11907	TINAROH::IRGC 73874-1::[IRIS 313-11907]	IRGC 128486	trop			SNPseek				C	A	T	G	C	G	A	G	C	A		C	G	G	T	C	C	C	G	G	C	T		T	G	T	T				A	G	A	G	C	T	T		G
HAP1a	IRIS 313-11908	DUAN SHEN ZI::IRGC 73962-1::[IRIS 313-11908]	IRGC 128284	temp			SNPseek				C	A	T	G	C	G	A	G	C	A		C	G	G	T	C	C	C	G	G	C	T		T	G	T	T				A	G	A	G	C	T	T		G
HAP1a	IRIS 313-11915	IB 95::IRGC 74677-1::[IRIS 313-11915]	IRGC 128316	trop			SNPseek				C	A	T	G	C	G	A	G	C	A		C	G	G	T	C	C	C	G	G	C	T		T	G	T	T				A	G		G	C	T	T
HAP1a	IRIS 313-11922	KHAO' NAN::IRGC 74981-1::[IRIS 313-11922]	IRGC 128340	subtrop			SNPseek				C	A	T	G	C	G	A	G	C	A		C	G	G	T	C	C	C	G	G	C	T		T	G	T	T				A	G	A	G	C	T	T		G
HAP1a	IRIS 313-11923	KHAO' NGAW::IRGC 74985-1::[IRIS 313-11923]	IRGC 128341	subtrop			SNPseek				C	A	T	G	C	G	A	G	C	A		C	G	G	T	C	C	C	G	G	C	T		T	G	T	T				A	G	A	G	C	T	T		G
HAP1a	IRIS 313-11924	NAM JAM::IRGC 75069-1::[IRIS 313-11924]	IRGC 128400	subtrop			SNPseek				C	A	T	G	C	G	A	G	C	A		C	G	G	T	C	C	C	G	G	C	T		T	G	T	T				A	G	A	G	C	T	T		G
HAP1a	IRIS 313-11926	SI NAM PUENG::IRGC 75165-1::[IRIS 313-11926]	IRGC 128472	subtrop			SNPseek				C	A	T	G	C	G	A	G	C	A		C	G	G	T	C	C	C	G	G	C	T		T	G	T	T				A	G	A	G	C	T	T		G
HAP1a	IRIS 313-11928	DAYRON MARANGRAS::IRGC 75209-1::[IRIS 313-11928]	IRGC 127307	trop			SNPseek				C	A	T	G	C	G	A	G	C	A		C	G	G	T	C	C	C	G	G	C	T		T	G	T	T				A	G	A	G	C	T	T		G
HAP1a	IRIS 313-11929	GILINGAN MARANGRAS::IRGC 75213-1::[IRIS 313-11929]	IRGC 127385	trop			SNPseek				C	A	T	G	C	G	A	G	C	A		C	G	G	T	C	C	C	G	G	C	T		T	G	T	T				A	G	A	G	C	T	T		G
HAP1a	IRIS 313-11931	PEI ZAO 15::IRGC 75247-1::[IRIS 313-11931]		temp			SNPseek				C	A	T	G	C	G	A	G	C	A		C	G	G	T	C	C	C	G	G	C	T		T	G	T	T				A	G	A	G	C	T	T		G
HAP1a	IRIS 313-11890	C 722323::IRGC 73147-1::[IRIS 313-11890]	IRGC 128252	temp			SNPseek				C	A	T	G	C	G	A	G	C	A		C	G	G	T	C	C	C	G	G	C	T		T	G	T	T				A	G	A	G	C	T	T		G
HAP1a	IRIS 313-11946	BWANGA MOUI::IRGC 76262-1::[IRIS 313-11946]		trop			SNPseek				C	A	T	G	C	G	A	G	C	A		C	G	G	T	C	C	C	G	G	C	T		T	G	T	T				A	G	A	G	C	T	T		G
HAP1a	IRIS 313-11892	HO MOK::IRGC 73171-1::[IRIS 313-11892]	IRGC 135754	subtrop			SNPseek				C	A	T	G	C	G	A	G	C	A		C	G	G	T	C	C	C	G	G	C	T		T	G	T	T				A	G	A	G	C	T	T		G
HAP1a	IRIS 313-11971	PARE LAMBAN BINGKA::IRGC 77601-1::[IRIS 313-11971]	IRGC 132029	trop			SNPseek				C	A	T	G	C	G	A	G	C	A		C	G	G	T	C	C	C	G	G	C	T		T	G	T	T				A	G	A	G	C	T	T		G
HAP1a	IRIS 313-11973	NOINJO::IRGC 77669-1::[IRIS 313-11973]	IRGC 132020	temp			SNPseek				C	A	T	G	C	G	A	G	C	A		C	G	G	T	C	C	C	G	G	C	T		T	G	T	T				A	G	A	G	C	T	T		G
HAP1a	IRIS 313-11994	KALINDIG::IRGC 78968-1::[IRIS 313-11994]	IRGC 131996	trop			SNPseek				C	A	T	G	C	G	A	G	C	A		C	G	G	T	C	C	C	G	G	C	T		T	G	T	T				A	G	A	G	C	T	T		G
HAP1a	IRIS 313-12003	GYEONGSAN 1::IRGC 79404-1::[IRIS 313-12003]	IRGC 128305	temp			SNPseek				C	A	T	G	C	G	A	G	C	A		C	G	G	T	C	C	C	G	G	C	T		T	G	T	T				A	G	A	G	C	T	T		G
HAP1a	IRIS 313-11981	TAICHUNG 188::IRGC 78209-1::[IRIS 313-11981]	IRGC 132043	temp			SNPseek				C	A	T	G	C	G	A	G	C	A		C	G	G	T	C	C	C	G	G	C	T		T	G	T	T				A	G	A	G	C	T	T		G
HAP1a	IRIS 313-12018	FRENSI GBOI::IRGC 79983-1::[IRIS 313-12018]	IRGC 128293	trop			SNPseek				C	A	T	G	C	G	A	G	C	A		C	G	G	T	C	C	C	G	G	C	T		T	G	T	T				A	G	A	G	C	T	T		G
HAP1a	IRIS 313-12021	ITA 131::IRGC 80025-1::[IRIS 313-12021]	IRGC 131992	trop			SNPseek				C	A	T	G	C	G	A	G	C	A		C	G	G	T	C	C	C	G	G	C	T		T	G	T	T				A	G	A	G	C	T	T		G
HAP1a	IRIS 313-12029	CHAO MEO::IRGC 80273-1::[IRIS 313-12029]	IRGC 132278	subtrop			SNPseek				C	A	T	G	C	G	A	G	C	A		C	G	G	T	C	C	C	G	G	C	T		T	G	T	T				A	G	A	G	C	T	T		G
HAP1a	IRIS 313-12031	P T Q QINDONAAL::IRGC 80410-1::[IRIS 313-12031]	IRGC 128437	trop			SNPseek				C	A	T	G	C	G	A	G	C	A		C	G	G	T	C	C	C	G	G	C	T		T	G	T	T				A	G	A	G	C	T	T		G
HAP1a	IRIS 313-11984	BLAU BLA::IRGC 78460-1::[IRIS 313-11984]		temp			SNPseek				C	A	T	G	C	G	A	G	C	A		C	G	G	T	C	C	C	G	G	C	T		T	G	T	T				A	G	A	G	C	T	T		G
HAP1a	IRIS 313-12045	BUYAN::IRGC 81440-1::[IRIS 313-12045]		trop			SNPseek				C	A	T	G	C	G	A	G	C	A		C	G	G	T	C	C	C	G	G	C	T		T	G	T	T				A	G	A	G	C	T	T		G
HAP1a	IRIS 313-12051	TINOLDO MARANGRAS::IRGC 81758-1::[IRIS 313-12051]	IRGC 128487	trop			SNPseek				C	A	T	G	C	G	A	G	C	A		C	G	G	T	C	C	C	G	G	C	T		T	G	T	T				A	G	A	G	C	T	T		G
HAP1a	IRIS 313-12054	HUA 24::IRGC 82127-1::[IRIS 313-12054]	IRGC 128312	temp			SNPseek				C	A	T	G	C	G	A	G	C	A		C	G	G	T	C	C	C	G	G	C	T		T	G	T	T				A	G	A	G	C	T	T		G
HAP1a	IRIS 313-12063	XIENG KANG::IRGC 82533-1::[IRIS 313-12063]	IRGC 132303	subtrop			SNPseek				C	A	T	G	C	G	A	G	C	A		C	G	G	T	C	C	C	G	G	C	T		T	G	T	T				A	G	A	G	C	T	T		G
HAP1a	IRIS 313-12068	PULUT KETAN::IRGC 82674-2::[IRIS 313-12068]	IRGC 132262	trop			SNPseek				C	A	T	G	C	G	A	G	C	A		C	G	G	T	C	C	C	G	G	C	T		T	G	T	T				A	G	A	G	C	T	T		G
HAP1a	IRIS 313-12071	NIA::IRGC 82728-1::[IRIS 313-12071]	IRGC 128406	subtrop			SNPseek				C	A	T	G	C	G	A	G	C	A		C	G	G	T	C	C	C	G	G	C	T		T	G	T	T				A	G	A	G	C	T	T		G
HAP1a	IRIS 313-12073	KASIGNAYAN::IRGC 82788-1::[IRIS 313-12073]	IRGC 128336	trop			SNPseek				C	A	T	G	C	G	A	G	C	A		C	G	G	T	C	C	C	G	G	C	T		T	G	T	T				A	G	A		C	T	T		G
HAP1a	IRIS 313-12076	HANG::IRGC 82842-1::[IRIS 313-12076]	IRGC 128306	subtrop			SNPseek				C	A	T	G	C	G	A	G	C	A		C	G	G	T	C	C	C	G	G	C	T		T	G	T	T				A	G	A	G	C	T	T		G
HAP1a	IRIS 313-12077	YOI::IRGC 82855-1::[IRIS 313-12077]	IRGC 127906	subtrop			SNPseek				C	A	T	G	C	G	A	G	C	A		C	G	G	T	C	C	C	G	G	C	T		T	G	T	T				A	G	A	G	C	T	T		G
HAP1a	IRIS 313-12129	MON LAI::IRGC 85857-1::[IRIS 313-12129]	IRGC 128391	subtrop			SNPseek				C	A	T	G	C	G	A	G	C	A		C	G	G	T	C	C	C	G	G	C	T				T	T				A	G	A	G	C	T	T		G
HAP1a	IRIS 313-12134	THATENG::IRGC 86377-1::[IRIS 313-12134]	IRGC 135802	subtrop		sd1	SNPseek				C	A	T	G	C	G	A	G	C	A		C	G	G	T	C	C	C	G	G	C	T		T	G	T	T				A	G	A	G	C	T	T		G
HAP1a	IRIS 313-12144	GINAYANGGANG::IRGC 87131-1::[IRIS 313-12144]	IRGC 136099	trop			SNPseek				C	A	T	G	C	G	A	G	C	A		C	G	G	T	C	C	C	G	G	C	T		T	G	T	T				A	G	A	G	C	T	T		G
HAP1a	IRIS 313-12200	LEUANG::IRGC 90000-1::[IRIS 313-12200]	IRGC 128362	subtrop			SNPseek				C	A	T	G	C	G	A	G	C	A		C	G	G	T	C	C	C	G	G	C	T		T	G	T	T				A	G	A	G	C	T	T		G
HAP1a	IRIS 313-12217	WEONJU 8::IRGC 90845-1::[IRIS 313-12217]	IRGC 128501	temp			SNPseek				C	A	T	G	C	G	A	G	C	A		C	G	G	T	C	C	C	G	G	C	T		T	G	T	T				A	G	A	G	C	T	T		G
HAP1a	IRIS 313-12226	PANG::IRGC 91987-1::[IRIS 313-12226]	IRGC 127712	subtrop			SNPseek				C	A	T	G	C	G	A	G	C	A		C	G	G	T	C	C	C	G	G	C	T		T	G	T	T				A	G	A	G	C	T	T		G
HAP1a	IRIS 313-12227	SET::IRGC 92200-1::[IRIS 313-12227]	IRGC 127795	subtrop		sd1	SNPseek				C	A	T	G	C	G	A	G	C	A		C	G	G	T	C	C	C	G	G	C	T		T	G	T	T				A	G	A	G	C	T	T		G
HAP1a	IRIS 313-12228	SOM::IRGC 92221-1::[IRIS 313-12228]	IRGC 128474	subtrop			SNPseek				C	A	T	G	C	G	A	G	C	A		C	G	G	T	C	C	C	G	G	C	T		T	G	T	T				A	G	A	G	C	T	T		G
HAP1a	IRIS 313-12241	SEMENDANG::IRGC 93633-1::[IRIS 313-12241]	IRGC 127793	trop			SNPseek				C	A	T	G	C	G	A	G	C	A		C	G	G	T	C	C	C	G	G	C	T		T	G	T	T				A	G	A	G	C	T	T		G
HAP1a	IRIS 313-12242	KHAO KHOT::IRGC 93892-1::[IRIS 313-12242]	IRGC 128339	subtrop			SNPseek				C	A	T	G	C	G	A	G	C	A		C	G	G	T	C	C	C	G	G	C	T		T	G	T	T				A	G	A	G	C	T	T		G
HAP1a	IRIS 313-12254	BAN BONG::IRGC 94565-1::[IRIS 313-12254]	IRGC 128237	subtrop			SNPseek				C	A	T	G		G		G	C	A		C		G	T	C	C	C	G	G	C	T		T	G	T	T				A	G	A	G	C	T	T		G
HAP1a	IRIS 313-12257	DENG PEE::IRGC 94991-1::[IRIS 313-12257]	IRGC 128276	subtrop			SNPseek				C	A	T	G	C	G	A	G	C	A		C	G	G	T	C	C	C	G	G	C	T		T	G	T	T				A	G	A	G	C	T	T		G
HAP1a	IRIS 313-12258	DON::IRGC 95117-1::[IRIS 313-12258]	IRGC 128283	subtrop			SNPseek				C	A	T	G	C	G	A	G	C	A		C	G	G	T	C	C	C	G	G	C	T		T		T	T				A	G	A	G	C	T	T		G
HAP1a	IRIS 313-12271	BATIBATIKAN::IRGC 96098-1::[IRIS 313-12271]	IRGC 127215	trop			SNPseek				C	A	T	G	C	G	A	G	C	A		C	G	G	T	C	C	C	G	G	C	T		T	G	T	T				A	G	A	G	C	T	T		G
HAP1a	IRIS 313-12272	MALAGKIT (ITIM)::IRGC 96124-1::[IRIS 313-12272]	IRGC 127594	trop			SNPseek				C	A	T	G	C	G	A	G	C	A		C	G	G	T	C	C	C	G	G	C	T		T	G	T	T				A	G	A	G	C	T	T		G
HAP1a	IRIS 313-12289	YARSABA::IRGC 97567-1::[IRIS 313-12289]	IRGC 132304	subtrop			SNPseek				C	A	T	G	C	G	A	G	C	A		C	G	G	T	C	C	C	G	G	C	T		T	G	T	T				A	G	A	G	C	T	T		G
HAP1a	IRIS 313-12262	NYAE::IRGC 95302-1::[IRIS 313-12262]	IRGC 128410	subtrop			SNPseek				C	A	T	G	C	G	A	G	C	A		C	G	G	T	C	C	C	G	G	C	T		T	G	T	T				A	G	A	G	C	T	T		G
HAP1a	IRIS 313-12299	MUANG TAY::IRGC 98382-1::[IRIS 313-12299]	IRGC 136100	subtrop			SNPseek				C	A	T	G	C	G	A	G	C	A		C	G	G	T	C	C	C	G	G	C	T		T	G	T	T				A	G	A	G	C	T	T		G
HAP1a	IRIS 313-12307	POU::IRGC 98968-1::[IRIS 313-12307]	IRGC 132034	subtrop			SNPseek				C	A	T	G	C	G	A	G	C	A		C	G	G	T	C	C	C	G	G	C	T		T	G	T	T				A	G	A	G	C	T	T		G
HAP1a	IRIS 313-12312	TA SENG::IRGC 99176-1::[IRIS 313-12312]	IRGC 128482	subtrop			SNPseek				C	A	T	G	C	G	A	G	C	A		C	G	G	T	C	C	C	G	G	C	T		T	G	T	T				A	G	A	G	C	T	T		G
HAP1a	IRIS 313-12313	LAI HIN::IRGC 99305-1::[IRIS 313-12313]	IRGC 135767	subtrop			SNPseek				C	A	T	G	C	G	A	G	C	A		C	G	G	T	C	C	C	G	G	C	T		T	G	T	T				A	G	A	G	C	T	T		G
HAP1a	IRIS 313-12321	LG 10344::IRGC 99789-1::[IRIS 313-12321]	IRGC 127557	subtrop			SNPseek				C	A	T	G	C	G	A	G	C	A		C	G	G	T	C	C	C	G	G	C	T		T	G	T	T				A	G	A	G	C	T	T		G
HAP1a	IRIS 313-12322	VOK::IRGC 99831-1::[IRIS 313-12322]	IRGC 128497	subtrop			SNPseek				C	A	T	G	C	G	A	G	C	A		C	G	G	T	C	C	C	G	G	C	T		T	G	T	T				A	G	A	G	C	T	T		G
HAP1a	IRIS 313-12323	BAN KEO::IRGC 99953-1::[IRIS 313-12323]	IRGC 135563	subtrop			SNPseek				C	A	T	G	C	G	A	G	C	A		C	G	G	T	C	C	C	G	G	C	T		T	G	T	T				A	G	A	G	C	T	T		G
HAP1a	IRIS 313-12330	CHAO PEE::IRGC 106767-1::[IRIS 313-12330]	IRGC 127267	subtrop			SNPseek				C		T	G	C	G	A	G	C	A		C	G	G	T	C	C	C	G	G	C	T		T	G	T	T				A	G	A	G	C	T	T		G
HAP1a	IRIS 313-12265	KON SIM::IRGC 95626-1::[IRIS 313-12265]	IRGC 128352	subtrop			SNPseek				C	A	T	G	C	G	A	G	C	A		C	G	G	T	C	C	C	G	G	C	T		T	G	T	T				A	G	A	G	C	T	T		G
HAP1a	IRIS 313-12332	DENG NYAY::IRGC 106907-1::[IRIS 313-12332]	IRGC 127312	subtrop			SNPseek				C	A	T	G	C	G	A	G	C	A		C	G	G	T	C	C	C	G	G	C	T		T	G	T	T				A	G	A	G	C	T	T		G
HAP1a	IRIS 313-12336	DO LEUANG::IRGC 106990-1::[IRIS 313-12336]	IRGC 128282	subtrop			SNPseek				C	A	T	G	C	G	A	G	C	A		C	G	G	T	C	C	C	G	G	C	T		T	G	T	T				A	G	A	G	C	T	T		G
HAP1a	IRIS 313-12337	DOK HIEN NOI::IRGC 107021-1::[IRIS 313-12337]	IRGC 127335	subtrop			SNPseek				C	A	T	G	C	G	A	G	C	A		C	G	G	T	C	C	C	G	G	C	T		T	G	T	T				A	G	A	G	C	T	T
HAP1a	IRIS 313-12340	NYAO::IRGC 107091-1::[IRIS 313-12340]	IRGC 128412	subtrop			SNPseek				C	A	T	G	C	G	A	G	C	A		C	G	G	T	C	C	C	G	G	C	T		T	G	T	T				A	G	A	G	C	T	T		G
HAP1a	IRIS 313-12266	KAUK PAHLING::IRGC 95823-2::[IRIS 313-12266]	IRGC 128520	subtrop			SNPseek				C	A	T	G	C	G	A	G	C	A		C	G	G	T	C	C	C	G	G	C	T		T	G	T	T				A	G	A	G	C	T	T		G
HAP1a	IRIS 313-12341	NYON::IRGC 107099-1::[IRIS 313-12341]	IRGC 128413	subtrop			SNPseek				C	A	T	G	C	G	A	G	C	A		C	G	G	T	C	C	C	G	G	C	T		T	G	T	T				A	G	A	G	C	T	T		G
HAP1a	IRIS 313-12342	HAI NA::IRGC 107117-1::[IRIS 313-12342]	IRGC 127399	subtrop			SNPseek				C	A	T	G	C	G	A	G	C	A		C	G	G	T	C	C	C	G	G	C	T		T	G	T	T				A	G	A	G	C	T	T		G
HAP1a	IRIS 313-12344	KHAO::IRGC 107359-1::[IRIS 313-12344]		subtrop			SNPseek				C	A	T	G	C	G	A	G	C	A		C	G	G	T	C	C	C	G	G	C	T		T	G	T	T				A	G	A	G	C	T	T		G
HAP1a	IRIS 313-12345	VIENG::IRGC 107375-2::[IRIS 313-12345]	IRGC 128201	subtrop			SNPseek				C	A	T	G	C	G	A	G	C	A		C	G		T	C	C	C	G	G	C	T		T	G	T	T				A	G	A	G	C	T	T		G
HAP1a	IRIS 313-12346	LAB::IRGC 107468-1::[IRIS 313-12346]	IRGC 127540	subtrop			SNPseek				C	A	T	G	C	G	A	G	C	A		C	G	G	T	C	C	C	G	G	C	T		T	G	T	T				A	G	A	G	C	T	T		G
HAP1a	IRIS 313-12347	LAI DAM::IRGC 107490-1::[IRIS 313-12347]	IRGC 127541	subtrop			SNPseek				C	A	T	G	C	G	A	G	C	A		C	G	G	T	C	C	C	G	G	C	T		T	G	T	T				A	G	A	G	C	T	T		G
HAP1a	IRIS 313-12348	LOUK NOK::IRGC 107599-1::[IRIS 313-12348]	IRGC 127575	subtrop			SNPseek				C	A	T	G	C	G	A	G	C	A		C	G	G	T	C	C	C	G	G	C	T		T	G	T	T				A	G	A	G	C	T	T		G
HAP1a	IRIS 313-12349	MAK KHEUA DENG::IRGC 107709-1::[IRIS 313-12349]	IRGC 127592	subtrop			SNPseek				C	A	T	G	C	G	A	G	C	A		C	G	G	T	C	C	C	G	G	C	T		T	G	T	T				A	G	A	G	C	T	T		G
HAP1a	IRIS 313-12350	MAK KHEUA KANG::IRGC 107712-1::[IRIS 313-12350]	IRGC 127593	subtrop			SNPseek				C	A	T	G	C	G	A	G	C	A		C	G	G	T	C	C	C	G	G	C	T		T	G	T	T				A	G	A	G	C	T	T		G
HAP1a	IRIS 313-12351	KHAO LOUANG::IRGC 107770-1::[IRIS 313-12351]	IRGC 135759	subtrop			SNPseek				C	A	T	G	C	G	A	G	C	A		C	G	G	T	C	C	C	G	G	C	T		T	G	T	T				A	G	A	G	C	T	T		G
HAP1a	IRIS 313-12352	MEE::IRGC 107773-1::[IRIS 313-12352]	IRGC 127621	subtrop			SNPseek				C	A	T	G	C	G	A	G	C	A		C	G	G	T	C	C	C	G	G	C	T		T	G	T	T				A	G	A	G	C	T	T		G
HAP1a	IRIS 313-12353	MOK::IRGC 107804-1::[IRIS 313-12353]	IRGC 132017	subtrop			SNPseek				C	A	T	G	C	G	A	G	C	A		C	G	G	T	C	C	C	G	G	C	T		T	G	T	T				A	G	A	G		T	T		G
HAP1a	IRIS 313-10437	NORIN 21::IRGC 493-1::[IRIS 313-10437]	IRGC 128409	temp			SNPseek				C	A	T	G	C	G	A	G	C	A		C	G	G	T	C	C	C	G	G	C	T		T	G	T	T				A	G	A	G	C	T	T		G
HAP1a	IRIS 313-10440	NAGKAYAT::IRGC 584-1::[IRIS 313-10440]	IRGC 127642	temp			SNPseek				C	A	T	G	C	G	A	G	C	A		C	G	G	T	C	C	C	G	G	C	T		T	G	T	T				A	G	A	G	C	T	T		G
HAP1a	IRIS 313-10453	LU TAO 2::IRGC 1175-1::[IRIS 313-10453]	IRGC 128371	japx			SNPseek				C	A	T	G	C	G	A	G	C	A		C	G	G	T	C	C	C	G	G	C	T		T	G	T	T				A	G	A	G	C	T	T		G
HAP1a	IRIS 313-10429	TAICHUNG 150::IRGC 80-1::[IRIS 313-10429]	IRGC 127834	temp			SNPseek				C	A	T	G	C	G	A	G	C	A		C	G	G	T	C	C	C	G	G	C	T		T	G	T	T				A	G	A	G	C	T	T		G
HAP1a	IRIS 313-10430	GINMASARI::IRGC 242-1::[IRIS 313-10430]	IRGC 128299	temp			SNPseek				C	A	T	G	C	G	A	G	C	A		C	G	G	T	C	C	C	G	G	C	T		T	G	T	T				A	G	A	G	C	T	T		G
HAP1a	IRIS 313-10469	KINUGASAWASE::IRGC 2609-1::[IRIS 313-10469]	IRGC 128347	temp			SNPseek				C	A	T	G	C	G	A	G	C	A		C	G		T	C	C	C	G	G	C				G	T	T				A	G	A	G	C	T	T		G
HAP1a	IRIS 313-10541	IACA ESCURO::IRGC 6636-1::[IRIS 313-10541]	IRGC 131990	trop			SNPseek				C	A	T	G	C	G	A	G	C	A		C	G	G	T	C	C	C	G	G	C	T		T	G	T	T				A	G	A	G	C	T	T		G
HAP1a	IRIS 313-10552	RL GOPHER::IRGC 6934-2::[IRIS 313-10552]	IRGC 128150	trop			SNPseek				C	A	T	G	C	G	A	G	C	A		C		G	T	C	C	C	G	G	C	T		T	G	T	T				A	G	A	G	C	T	T		G
HAP1a	IRIS 313-10558	LITCHIKIANG::IRGC 7287-1::[IRIS 313-10558]	IRGC 128367	temp			SNPseek				C	A	T	G	C	G	A	G	C	A		C	G	G		C		C	G	G	C	T		T		T	T				A	G	A	G	C	T	T		G
HAP1a	IRIS 313-10559	FI LAI FENG::IRGC 7288-1::[IRIS 313-10559]	IRGC 127369	temp			SNPseek				C	A	T	G	C	G	A	G	C	A		C	G	G	T	C	C	C	G	G	C	T		T	G	T	T				A	G	A	G	C	T	T		G
HAP1a	IRIS 313-10563	SHA TIAO TSAO::IRGC 7339-1::[IRIS 313-10563]	IRGC 128469	temp			SNPseek				C	A	T	G	C	G	A	G	C	A		C	G	G	T	C	C	C	G	G	C	T		T	G	T	T				A	G	A	G	C	T	T		G
HAP1a	IRIS 313-10564	250 KUNGANI 1::IRGC 7370-1::[IRIS 313-10564]	IRGC 128209	temp			SNPseek				C	A	T	G	C	G	A	G	C	A		C	G	G	T	C	C	C	G	G	C	T		T	G	T	T				A	G	A	G	C	T	T		G
HAP1a	IRIS 313-10567	AIKAWA 44::IRGC 7676-1::[IRIS 313-10567]	IRGC 128212	temp			SNPseek				C	A	T	G	C	G	A	G	C	A		C	G	G	T	C	C	C	G	G	C	T		T	G	T	T				A	G	A	G	C	T	T		G
HAP1a	IRIS 313-10568	OITA MII 120::IRGC 7696-1::[IRIS 313-10568]	IRGC 128414	temp			SNPseek				C	A	T	G	C	G		G		A		C			T	C	C	C	G	G	C	T		T	G	T					A	G	A	G	C	T	T		G
HAP1a	IRIS 313-10569	BEN KEI::IRGC 7769-1::[IRIS 313-10569]	IRGC 128240	temp			SNPseek				C	A	T	G	C	G	A	G	C	A		C	G	G	T	C	C	C	G	G	C	T		T	G	T	T				A	G	A	G	C	T	T		G
HAP1a	IRIS 313-10570	CHUSEI HONEN::IRGC 7777-1::[IRIS 313-10570]	IRGC 128263	temp			SNPseek				C	A	T	G	C	G	A	G	C	A		C	G	G	T	C	C	C	G	G	C	T		T	G	T	T				A	G	A	G	C	T	T		G
HAP1a	IRIS 313-10577	IFUGAO RICE::IRGC 8052-1::[IRIS 313-10577]	IRGC 128318	trop			SNPseek				C	A	T	G	C	G	A	G	C	A		C	G	G	T	C	C	C	G	G	C	T		T	G	T	T				A	G	A	G	C	T	T		G
HAP1a	IRIS 313-10582	QINOGNAS::IRGC 8135-1::[IRIS 313-10582]	IRGC 128440	trop			SNPseek				C	A	T	G	C	G	A	G	C	A		C	G	G	T	C	C	C	G	G	C	T		T	G	T	T				A	G	A	G	C	T	T		G
HAP1a	IRIS 313-10583	TSAO SIAO PEH TAO::IRGC 8265-2::[IRIS 313-10583]	IRGC 128194	temp			SNPseek				C	A	T	G	C	G	A	G	C	A		C	G	G	T	C	C	C	G	G	C	T		T		T	T				A	G	A	G	C	T	T		G
HAP1a	IRIS 313-10631	SHINCHIKU IKU 97::IRGC 10429-1::[IRIS 313-10631]	IRGC 127798	temp			SNPseek				C	A	T	G	C	G	A	G	C	A		C	G	G	T	C	C	C	G	G	C	T		T	G	T	T				A	G	A	G	C	T	T		G
HAP1a	IRIS 313-10642	SACHIKAZE::IRGC 10891-1::[IRIS 313-10642]	IRGC 128455	temp			SNPseek				C	A	T	G	C	G	A	G	C	A		C	G	G	T	C	C	C	G	G	C	T		T	G	T	T				A	G	A	G	C	T	T		G
HAP1a	IRIS 313-10644	BUSIYETAN::IRGC 11205-1::[IRIS 313-10644]	IRGC 128249	trop			SNPseek				C	A	T	G	C	G	A	G	C	A		C	G	G	T	C	C	C	G	G	C	T		T	G	T	T				A	G	A	G	C	T	T		G
HAP1a	IRIS 313-10645	LENKIBE-N::IRGC 11216-1::[IRIS 313-10645]	IRGC 128359	trop			SNPseek				C	A	T	G	C	G	A	G	C	A		C	G	G	T	C	C	C	G	G	C	T		T	G	T	T				A	G	A	G	C	T	T		G
HAP1a	IRIS 313-10649	RACION 1::IRGC 11340-1::[IRIS 313-10649]	IRGC 127758	trop			SNPseek				C	A	T	G	C	G		G		A		C	G	G	T	C	C	C	G	G	C	T		T	G	T	T				A	G	A	G	C	T	T		G
HAP1a	IRIS 313-10617	KARA SHALI::IRGC 9293-1::[IRIS 313-10617]	IRGC 131998	temp			SNPseek				C	A	T	G	C	G	A	G	C	A		C	G	G	T	C	C	C	G	G	C	T		T	G	T	T				A	G	A	G	C	T	T
HAP1a	IRIS 313-10653	MAK KHEUA::IRGC 11628-1::[IRIS 313-10653]		subtrop			SNPseek				C	A	T	G	C	G	A	G	C	A		C	G	G	T	C	C	C	G	G	C	T		T	G	T	T				A	G	A	G	C	T	T		G
HAP1a	IRIS 313-10656	NOK KOD::IRGC 11784-1::[IRIS 313-10656]	IRGC 128407	subtrop			SNPseek				C	A	T	G	C	G	A	G	C	A		C	G	G	T	C	C	C	G	G	C	T		T	G	T	T				A	G	A	G	C	T	T		G
HAP1a	IRIS 313-10657	THANGONE::IRGC 11816-1::[IRIS 313-10657]	IRGC 135801	subtrop			SNPseek				C	A	T	G	C	G	A	G	C	A		C		G	T	C	C	C	G	G	C	T			G	T	T				A	G	A	G	C	T	T		G
HAP1a	IRIS 313-10660	LEP HED::IRGC 11917-1::[IRIS 313-10660]	IRGC 128360	subtrop			SNPseek				C	A	T	G	C	G	A	G	C	A		C	G	G	T	C	C	C	G	G	C	T		T	G	T	T				A	G	A	G	C	T	T		G
HAP1a	IRIS 313-10618	CHINES::IRGC 9316-1::[IRIS 313-10618]	IRGC 128261	temp			SNPseek				C	A	T	G	C	G	A	G	C	A		C	G	G	T	C	C	C	G	G	C	T		T	G	T	T				A	G	A	G	C	T	T		G
HAP1a	IRIS 313-10619	BICCO BRANCO::IRGC 9478-1::[IRIS 313-10619]	IRGC 127225	trop			SNPseek				C	A	T	G	C	G	A	G	C	A		C	G	G	T	C	C	C	G	G	C	T		T	G	T	T					G	A	G	C	T	T		G
HAP1a	IRIS 313-10677	DEWAMINORI::IRGC 12743-1::[IRIS 313-10677]	IRGC 128277	temp			SNPseek				C	A	T	G	C	G	A	G	C	A		C	G	G	T	C	C	C	G	G	C	T		T	G	T	T				A	G	A	G	C	T	T		G
HAP1a	IRIS 313-10679	KHAI DO::IRGC 12903-2::[IRIS 313-10679]	IRGC 132345	subtrop			SNPseek				C	A	T	G	C	G	A	G	C	A		C	G	G	T	C	C	C	G	G	C	T		T	G	T	T				A	G	A	G	C	T	T		G
HAP1a	IRIS 313-10620	R 27::IRGC 9498-1::[IRIS 313-10620]	IRGC 128443	trop			SNPseek				C	A	T	G	C	G	A	G	C	A		C	G	G	T	C	C	C	G	G	C	T		T	G	T	T				A	G	A	G	C	T	T		G
HAP1a	IRIS 313-10689	SIKEP BATU::IRGC 13514-2::[IRIS 313-10689]	IRGC 128165	trop			SNPseek				C		T	G	C	G	A	G	C	A		C	G	G	T	C	C	C	G	G	C	T		T	G	T	T				A	G	A	G	C	T	T		G
HAP1a	IRIS 313-10693	SEREH::IRGC 13732-2::[IRIS 313-10693]	IRGC 132268	trop			SNPseek				C	A	T	G	C	G	A	G	C	A		C	G	G	T	C	C	C	G	G	C	T		T	G	T	T				A	G	A	G	C	T	T		G
HAP1a	IRIS 313-10708	B 6311 A 5553-16-2::IRGC 14541-1::[IRIS 313-10708]	IRGC 128233	trop			SNPseek				C	A	T	G	C	G	A	G	C	A		C	G	G	T	C	C	C	G	G	C	T		T	G	T	T				A	G	A	G	C	T	T		G
HAP1a	IRIS 313-10740	KETAN PAPAH AREN::IRGC 16467-1::[IRIS 313-10740]	IRGC 127508	trop			SNPseek				C	A	T	G	C	G	A	G	C	A		C	G	G	T	C	C	C	G	G	C	T		T	G	T	T				A	G	A	G	C	T	T		G
HAP1a	IRIS 313-10741	KETAN PELERN::IRGC 16468-1::[IRIS 313-10741]	IRGC 127509	trop			SNPseek				C	A	T	G	C	G	A	G	C	A		C	G	G	T	C	C	C	G	G	C	T		T	G	T	T				A	G	A	G	C	T	T		G
HAP1a	IRIS 313-10744	SIPON::IRGC 16570-1::[IRIS 313-10744]	IRGC 127811	trop			SNPseek				C	A	T	G	C	G	A	G	C	A		C	G	G	T	C	C	C	G	G	C	T		T	G	T	T				A	G	A	G	C	T	T		G
HAP1a	IRIS 313-10745	SLOBOK::IRGC 16571-1::[IRIS 313-10745]	IRGC 127818	trop			SNPseek				C	A	T	G	C	G	A	G	C	A		C	G	G	T	C	C	C	G	G	C	T		T	G	T	T				A	G	A	G	C		T		G
HAP1a	IRIS 313-10746	TJEMPO KREMBUNG::IRGC 16603-1::[IRIS 313-10746]		trop			SNPseek				C	A	T	G	C	G	A	G	C	A		C	G	G	T	C	C	C	G	G	C	T		T	G	T	T				A	G	A	G	C	T	T		G
HAP1a	IRIS 313-10747	TJOKRON::IRGC 16653-2::[IRIS 313-10747]	IRGC 136111	trop			SNPseek				C	A	T	G	C	G	A	G	C	A		C	G	G	T	C	C	C	G	G	C	T		T	G	T	T				A	G	A	G	C	T	T		G
HAP1a	IRIS 313-10752	O. SATIVA::IRGC 16898-1::[IRIS 313-10752]	IRGC 128415	trop			SNPseek				C	A	T	G	C	G	A	G	C	A		C	G	G	T	C	C	C	G	G	C	T		T	G	T	T				A	G	A	G	C	T	T		G
HAP1a	IRIS 313-10712	KOTO OURA S 5::IRGC 15155-1::[IRIS 313-10712]	IRGC 128354	trop			SNPseek				C	A	T	G	C	G	A	G	C	A		C	G	G	T	C	C	C	G	G	C	T		T	G	T	T				A	G	A	G	C	T	T		G
HAP1a	IRIS 313-10758	AEN METAN::IRGC 17142-1::[IRIS 313-10758]	IRGC 132386	trop			SNPseek				C	A	T	G	C	G	A	G	C	A		C	G	G	T	C	C	C	G	G	C	T		T	G	T	T				A	G	A	G	C	T	T		G
HAP1a	IRIS 313-10759	ANDEL::IRGC 17153-2::[IRIS 313-10759]	IRGC 127927	trop			SNPseek				C	A	T	G	C	G	A	G	C	A		C		G	T	C	C	C	G	G	C	T		T	G	T	T				A	G	A	G	C	T	T
HAP1a	IRIS 313-10761	BALIK SEMAH::IRGC 17201-2::[IRIS 313-10761]	IRGC 127984	trop			SNPseek				C	A	T	G	C	G	A	G	C	A		C	G	G	T	C	C	C	G	G	C	T		T	G	T	T				A	G	A	G	C	T	T		G
HAP1a	IRIS 313-10765	CERE KAWAT::IRGC 17401-2::[IRIS 313-10765]	IRGC 128010	trop			SNPseek				C	A	T	G	C	G	A	G	C	A		C	G	G	T	C	C	C	G	G	C	T		T	G	T	T				A	G	A	G	C	T	T		G
HAP1a	IRIS 313-10766	DJALAWARA::IRGC 17471-1::[IRIS 313-10766]	IRGC 127325	trop			SNPseek				C	A	T	G	C	G	A	G	C	A		C	G	G	T	C	C	C	G	G	C	T		T	G	T	T				A	G	A	G	C	T	T		G
HAP1a	IRIS 313-10767	DJANGGOT::IRGC 17491-2::[IRIS 313-10767]	IRGC 128032	trop			SNPseek				C	A	T	G	C	G	A	G	C	A		C	G	G	T	C	C	C	G	G	C	T		T	G	T	T				A	G	A	G	C	T	T		G
HAP1a	IRIS 313-10773	HAWARA DJEDAH::IRGC 17728-1::[IRIS 313-10773]	IRGC 131989	trop			SNPseek				C	A	T	G	C	G	A	G	C	A		C	G	G	T	C	C	C	G	G	C	T		T	G	T	T				A	G	A	G	C	T	T		G
HAP1a	IRIS 313-10780	KETAN LALER::IRGC 17897-1::[IRIS 313-10780]	IRGC 127505	trop			SNPseek				C	A	T	G	C	G	A	G	C	A		C	G	G	T	C	C	C	G	G	C	T		T	G	T	T				A	G	A	G	C		T		G
HAP1a	IRIS 313-10781	KETAN MLANTING::IRGC 17916-1::[IRIS 313-10781]	IRGC 127506	trop			SNPseek				C	A	T	G	C	G	A	G	C	A		C	G	G	T	C	C	C	G	G	C	T		T	G	T	T				A	G	A	G	C	T	T		G
HAP1a	IRIS 313-10783	KETAN OSOG::IRGC 17929-1::[IRIS 313-10783]	IRGC 127507	trop			SNPseek				C	A	T	G	C	G	A	G	C	A		C	G	G	T	C	C	C	G	G	C	T		T	G	T	T				A	G	A	G	C	T	T		G
HAP1a	IRIS 313-10785	KETAN SLAWI::IRGC 17963-1::[IRIS 313-10785]	IRGC 127510	trop			SNPseek				C	A	T	G	C	G	A	G	C	A		C	G	G	T	C	C	C	G	G	C	T		T	G	T	T				A	G	A	G	C	T	T		G
HAP1a	IRIS 313-10789	LENGGANG GENUK BULU::IRGC 18119-1::[IRIS 313-10789]	IRGC 132009	trop			SNPseek				C	A	T	G	C	G	A	G	C	A		C	G	G	T	C	C	C	G	G	C	T		T	G	T	T				A	G	A	G	C	T	T		G
HAP1a	IRIS 313-10790	LOLAWAJI::IRGC 18131-1::[IRIS 313-10790]		trop			SNPseek				C	A	T	G	C	G	A	G	C	A		C	G	G	T	C	C	C	G	G	C	T		T	G	T	T				A	G	A	G	C	T	T		G
HAP1a	IRIS 313-10793	MELIK::IRGC 18238-2::[IRIS 313-10793]	IRGC 132257	trop			SNPseek				C	A	T	G	C	G	A	G	C	A		C	G	G	T	C	C	C	G	G	C	T		T	G	T	T				A	G	A	G	C	T	T		G
HAP1a	IRIS 313-10795	MLATI::IRGC 18278-1::[IRIS 313-10795]	IRGC 128389	trop			SNPseek				C	A	T	G	C	G	A	G	C	A		C	G	G	T	C	C	C	G	G	C	T		T	G	T	T				A	G	A	G	C	T	T		G
HAP1a	IRIS 313-10798	NOGO BELE 2::IRGC 18328-2::[IRIS 313-10798]	IRGC 135640	trop			SNPseek				C	A	T	G	C	G	A	G	C	A		C	G	G	T	C	C	C	G	G	C	T		T	G	T	T				A	G	A	G	C	T	T		G
HAP1a	IRIS 313-10800	PALOTAN MELATI::IRGC 18426-2::[IRIS 313-10800]	IRGC 128127	trop			SNPseek				C	A	T	G	C	G	A	G	C	A		C	G	G	T	C	C	C	G	G	C	T		T	G	T	T				A	G	A	G	C	T	T		G
HAP1a	IRIS 313-10801	PARE BUWUN::IRGC 18456-2::[IRIS 313-10801]	IRGC 132378	trop			SNPseek				C	A	T	G	C	G	A	G	C	A		C	G	G	T	C	C	C	G	G	C	T		T	G	T	T				A	G	A	G	C	T	T		G
HAP1a	IRIS 313-10815	SIDJANGGUK::IRGC 18826-2::[IRIS 313-10815]	IRGC 135632	trop			SNPseek				C	A	T	G	C	G	A	G	C	A		C	G	G	T	C	C	C	G	G	C	T		T	G	T	T				A	G	A	G	C	T	T		G
HAP1a	IRIS 313-10817	SLAMET::IRGC 18900-1::[IRIS 313-10817]	IRGC 135796	trop			SNPseek				C	A	T	G	C	G	A	G	C	A		C	G	G	T	C	C	C	G	G	C	T		T	G	T	T				A	G	A	G	C	T	T		G
HAP1a	IRIS 313-10802	PEUTEUJ::IRGC 18484-1::[IRIS 313-10802]		trop			SNPseek				C	A	T	G	C	G	A	G	C	A		C	G	G	T	C	C	C	G	G	C	T		T	G	T	T				A	G	A	G	C	T	T		G
HAP1a	IRIS 313-10828	IKOGAN::IRGC 19412-1::[IRIS 313-10828]	IRGC 128319	trop			SNPseek				C	A	T	G	C	G	A	G	C	A		C	G	G	T	C	C	C	G	G	C	T		T	G	T	T				A	G	A	G	C	T	T		G
HAP1a	IRIS 313-10829	INAMBOG::IRGC 19415-1::[IRIS 313-10829]	IRGC 128320	trop			SNPseek				C	A	T	G	C	G	A	G	C	A		C	G	G	T	C	C	C	G	G	C	T		T	G	T	T				A	G	A	G	C	T	T		G
HAP1a	IRIS 313-10803	PLAMPEYAN::IRGC 18494-1::[IRIS 313-10803]		trop			SNPseek				C	A	T	G	C	G	A	G	C	A		C	G	G	T	C	C	C	G	G	C	T		T	G	T	T				A	G	A	G	C	T	T		G
HAP1a	IRIS 313-10831	MALANDI 2::IRGC 19454-2::[IRIS 313-10831]	IRGC 132355	trop			SNPseek				C	A	T	G	C	G	A	G	C	A		C	G	G	T	C	C	C	G	G	C	T		T	G	T	T				A	G	A	G	C	T	T		G
HAP1a	IRIS 313-10834	IARI 11387::IRGC 19573-1::[IRIS 313-10834]	IRGC 128314	subtrop			SNPseek				C	A	T	G	C	G	A	G	C	A		C	G	G	T	C	C	C	G	G	C	T		T	G	T	T				A	G	A	G		T	T		G
HAP1a	IRIS 313-10837	BACK KYUNG ZO::IRGC 19698-2::[IRIS 313-10837]	IRGC 132323	temp			SNPseek				C	A	T	G	C	G	A	G	C	A		C	G	G	T	C	C	C	G	G	C	T		T	G	T	T				A	G	A	G	C	T	T		G
HAP1a	IRIS 313-10838	SSAL BYEO::IRGC 19867-2::[IRIS 313-10838]	IRGC 132370	temp			SNPseek				C	A	T	G	C	G	A	G	C	A		C	G	G	T	C	C	C	G	G	C	T		T	G	T	T				A	G	A	G	C	T	T		G
HAP1a	IRIS 313-10839	TAE GU NA::IRGC 19875-2::[IRIS 313-10839]	IRGC 132270	temp			SNPseek				C	A	T	G	C	G	A	G	C	A		C	G	G	T	C	C	C	G	G	C	T		T	G	T	T				A	G	A	G	C	T	T		G
HAP1a	IRIS 313-10840	YE ZO::IRGC 19888-1::[IRIS 313-10840]	IRGC 128507	temp			SNPseek				C	A	T	G	C	G	A	G	C	A		C	G	G	T	C	C	C	G	G	C	T		T	G	T	T				A		A	G	C	T	T		G
HAP1a	IRIS 313-10805	PULO::IRGC 18519-1::[IRIS 313-10805]	IRGC 127746	trop			SNPseek				C	A	T	G	C	G	A	G	C	A		C	G	G	T	C	C	C	G	G	C	T		T	G	T	T				A	G	A	G	C	T	T		G
HAP1a	IRIS 313-10853	ARC 10028::IRGC 20656-2::[IRIS 313-10853]	IRGC 132239	japx			SNPseek				C	A	T	G	C	G	A	G	C	A		C	G	G	T	C	C	C	G	G	C	T		T	G	T	T				A	G	A	G	C	T	T		G
HAP1a	IRIS 313-10866	ARC 11478::IRGC 21418-1::[IRIS 313-10866]	IRGC 128221	subtrop			SNPseek				C	A	T	G	C	G	A	G	C	A		C	G	G	T	C	C	C	G	G	C	T		T	G	T	T				A	G	A	G	C	T	T		G
HAP1a	IRIS 313-10867	ARC 11538::IRGC 21463-1::[IRIS 313-10867]	IRGC 128222	subtrop			SNPseek				C	A	T	G	C	G	A	G	C	A		C	G	G	T	C	C	C	G	G	C	T		T	G	T	T				A	G	A	G	C	T	T		G
HAP1a	IRIS 313-10870	ARC 11768::IRGC 21630-1::[IRIS 313-10870]	IRGC 131966	subtrop			SNPseek				C	A	T	G	C	G	A	G	C	A		C	G	G	T	C	C	C	G	G	C	T		T	G	T	T				A	G	A	G	C	T	T		G
HAP1a	IRIS 313-10874	ARC 11946::IRGC 21768-2::[IRIS 313-10874]	IRGC 132318	subtrop			SNPseek				C	A	T	G	C	G	A	G	C	A		C	G	G	T	C	C	C	G	G	C	T		T	G	T	T				A	G	A	G	C	T	T		G
HAP1a	IRIS 313-10808	RANTE::IRGC 18608-2::[IRIS 313-10808]	IRGC 128147	trop			SNPseek				C	A	T	G	C	G	A	G	C	A		C	G	G	T	C	C	C	G	G	C	T		T	G	T	T				A	G	A	G	C	T	T		G
HAP1a	IRIS 313-10884	ARC 12493::IRGC 22098-1::[IRIS 313-10884]	IRGC 128225	subtrop			SNPseek				C	A	T	G	C	G	A	G	C	A		C	G	G	T	C	C	C	G	G	C	T		T	G	T	T				A	G	A	G	C	T	T		G
HAP1a	IRIS 313-10886	ARC 12655::IRGC 22226-2::[IRIS 313-10886]	IRGC 132240	subtrop			SNPseek				C	A	T	G	C	G	A	G	C	A		C	G	G	T	C	C	C	G	G	C	T		T	G	T	T				A	G	A	G	C	T	T		G
HAP1a	IRIS 313-10888	ARC 12726::IRGC 22288-2::[IRIS 313-10888]	IRGC 127943	subtrop			SNPseek				C	A	T	G	C	G	A	G	C	A		C	G	G	T	C	C	C	G	G	C	T		T	G	T	T				A	G	A	G	C	T	T		G
HAP1a	IRIS 313-10889	ARC 12730::IRGC 22291-1::[IRIS 313-10889]		subtrop			SNPseek				C	A	T	G	C	G	A	G	C	A		C	G	G	T	C	C	C	G	G	C	T		T	G	T	T				A	G	A	G	C	T	T		G
HAP1a	IRIS 313-10809	SAMPANG KUNING::IRGC 18678-2::[IRIS 313-10809]	IRGC 128158	trop			SNPseek				C	A	T	G	C	G	A	G	C	A		C	G	G	T	C	C	C	G		C	T		T	G	T	T				A	G	A	G	C	T	T		G
HAP1a	IRIS 313-10890	ARC 12861::IRGC 22395-1::[IRIS 313-10890]		subtrop			SNPseek				C	A	T	G	C	G	A	G	C	A		C	G	G	T	C	C	C	G	G	C	T		T	G	T	T				A	G	A	G	C	T	T		G
HAP1a	IRIS 313-10893	ARC 13156::IRGC 22514-1::[IRIS 313-10893]	IRGC 128226	subtrop			SNPseek				C	A	T	G	C	G	A	G	C	A		C	G	G	T	C	C	C	G	G	C	T		T	G	T	T				A	G	A	G	C	T	T		G
HAP1a	IRIS 313-10895	ARC 13257::IRGC 22608-1::[IRIS 313-10895]	IRGC 127151	subtrop			SNPseek				C	A	T	G	C	G	A	G	C	A		C	G	G	T	C	C	C	G	G	C	T		T	G	T	T				A	G	A	G	C	T	T		G
HAP1a	IRIS 313-10916	SRAU SLAP::IRGC 23267-2::[IRIS 313-10916]		temp			SNPseek				C	A	T	G	C	G	A	G	C	A		C	G	G	T	C	C	C	G	G	C	T		T	G	T	T				A	G	A	G	C	T	T		G
HAP1a	IRIS 313-10919	PINIDWA QAN QIPUGO PINGKITAN::IRGC 23359-1::[IRIS 313-10919]	IRGC 127731	trop			SNPseek				C	A	T	G	C	G	A	G	C	A		C	G	G	T	C	C	C	G	G	C	T		T	G	T	T				A	G	A	G	C		T		G
HAP1a	IRIS 313-10922	R 258::IRGC 23702-2::[IRIS 313-10922]	IRGC 132264	subtrop			SNPseek				C	A	T	G	C	G	A	G	C	A		C	G	G	T	C	C	C	G	G	C	T		T	G	T	T				A	G	A	G	C	T	T		G
HAP1a	IRIS 313-10923	CHABLI CHABOL GLANG::IRGC 23706-1::[IRIS 313-10923]	IRGC 128256	subtrop			SNPseek				C	A	T	G	C	G	A	G	C	A		C	G	G	T	C	C	C	G	G	C	T		T	G	T	T				A	G	A	G	C	T	T		G
HAP1a	IRIS 313-10926	RAM SALEE KATAKA::IRGC 24014-1::[IRIS 313-10926]	IRGC 127761	aro			SNPseek				C	A	T	G	C	G	A	G	C	A		C	G	G	T	C	C	C	G		C	T		T	G	T	T				A	G	A	G	C	T	T
HAP1a	IRIS 313-10931	PAKWALAN::IRGC 24156-1::[IRIS 313-10931]	IRGC 132025	trop			SNPseek				C	A	T	G	C	G	A	G	C	A		C	G	G	T	C	C	C	G	G	C	T		T	G	T	T				A	G	A	G	C	T	T		G
HAP1a	IRIS 313-10936	KETAN GUNDIL::IRGC 24568-1::[IRIS 313-10936]	IRGC 127504	trop			SNPseek				C	A	T	G	C	G	A	G	C	A		C	G	G	T	C	C	C	G	G	C	T		T	G	T	T				A	G	A	G	C	T	T		G
HAP1a	IRIS 313-10945	BULAK::IRGC 24884-1::[IRIS 313-10945]	IRGC 128247	trop			SNPseek				C	A	T	G	C	G	A	G	C	A		C	G	G	T	C	C	C	G	G	C	T		T	G	T	T				A	G	A	G	C	T	T		G
HAP1a	IRIS 313-10956	PUTUS TOLO::IRGC 25636-2::[IRIS 313-10956]	IRGC 128144	trop			SNPseek				C	A	T	G	C	G	A	G	C	A		C	G	G	T	C	C	C	G	G	C	T		T	G	T	T				A	G	A	G	C	T	T		G
HAP1a	IRIS 313-10957	RANGKAI KEPEL::IRGC 25640-1::[IRIS 313-10957]	IRGC 128446	trop			SNPseek				C	A	T	G	C	G	A	G	C	A		C	G	G	T	C	C	C	G	G	C	T		T	G	T	T				A	G	A	G	C	T	T
HAP1a	IRIS 313-10958	RENIK BELITI::IRGC 25648-1::[IRIS 313-10958]	IRGC 128450	trop			SNPseek				C	A	T	G	C	G	A	G	C	A		C	G	G	T	C	C	C	G	G	C	T		T	G		T				A	G	A	G	C	T	T		G
HAP1a	IRIS 313-10959	SITABO TABO::IRGC 25798-1::[IRIS 313-10959]	IRGC 128473	trop			SNPseek				C	A	T	G	C	G	A	G	C	A		C	G	G	T	C	C	C	G	G	C	T		T	G	T	T				A	G	A	G	C	T	T		G
HAP1a	IRIS 313-10967	IAS 22-8 PALMAR::IRGC 26058-1::[IRIS 313-10967]	IRGC 128315	temp			SNPseek				C		T	G	C	G	A	G	C	A		C	G	G	T	C	C	C	G	G	C	T		T	G	T	T				A	G	A	G	C	T	T		G
HAP1a	IRIS 313-10999	LANDEO::IRGC 27164-1::[IRIS 313-10999]	IRGC 127550	trop			SNPseek				C	A	T	G	C	G	A	G	C	A		C	G	G	T	C	C	C	G	G	C	T		T	G	T	T				A	G	A	G	C	T	T		G
HAP1a	IRIS 313-11001	PAEDAI SOBUDI::IRGC 27222-1::[IRIS 313-11001]	IRGC 128421	trop			SNPseek				C	A	T	G	C	G	A	G	C	A		C	G	G	T	C	C	C	G	G	C	T		T	G	T	T				A	G	A	G		T	T		G
HAP1a	IRIS 313-11004	PAE SANGGULA::IRGC 27297-1::[IRIS 313-11004]	IRGC 128423	trop			SNPseek				C	A	T	G	C	G	A	G	C	A		C	G	G	T	C	C	C	G	G	C	T		T	G	T	T				A	G	A	G	C	T	T		G
HAP1a	IRIS 313-11007	PULUT BONGO::IRGC 27397-2::[IRIS 313-11007]	IRGC 128141	trop			SNPseek				C	A	T	G	C	G	A	G	C	A		C	G	G	T	C	C	C	G	G	C	T		T	G	T	T				A	G	A	G	C	T	T		G
HAP1a	IRIS 313-11009	PULUT HALAPA::IRGC 27403-1::[IRIS 313-11009]	IRGC 127749	trop			SNPseek				C	A			C	G	A	G	C	A		C	G	G	T	C	C	C	G	G	C	T		T	G	T	T				A	G	A	G	C	T	T		G
HAP1a	IRIS 313-10991	GINATOS::IRGC 26876-1::[IRIS 313-10991]	IRGC 128298	trop			SNPseek				C	A	T	G	C	G	A	G	C	A		C	G	G	T	C	C	C	G	G	C	T		T	G	T	T				A	G	A	G	C	T	T		G
HAP1a	IRIS 313-11045	ENGKABANG::IRGC 28694-2::[IRIS 313-11045]	IRGC 128039	trop			SNPseek				C	A	T	G	C	G	A	G	C	A		C	G	G	T	C	C	C	G	G	C	T		T	G	T	T				A	G	A	G	C	T	T		G
HAP1a	IRIS 313-11046	LALANGIT::IRGC 28715-1::[IRIS 313-11046]		trop			SNPseek				C	A	T	G	C	G	A	G	C	A		C	G	G	T	C	C	C	G	G	C	T		T	G	T	T				A	G	A	G	C	T	T		G
HAP1a	IRIS 313-10993	LANNAB::IRGC 26936-2::[IRIS 313-10993]	IRGC 132349	trop			SNPseek				C	A	T	G	C	G	A	G	C	A		C	G	G	T	C	C	C	G	G	C	T		T	G	T	T				A	G	A	G	C	T	T		G
HAP1a	IRIS 313-10994	PANGETAN::IRGC 26942-1::[IRIS 313-10994]	IRGC 135783	trop			SNPseek				C	A	T	G	C	G	A	G	C	A		C	G	G	T	C	C	C	G	G	C	T		T	G	T	T				A	G	A	G	C	T	T		G
HAP1a	IRIS 313-11068	PANKAIT 31::IRGC 29377-1::[IRIS 313-11068]	IRGC 128426	aro			SNPseek				C	A	T	G	C	G	A	G	C	A		C	G	G	T	C	C	C	G	G	C	T		T	G	T	T				A	G	A	G	C	T	T		G
HAP1a	IRIS 313-11069	TUPA 15-3::IRGC 29416-2::[IRIS 313-11069]	IRGC 128197	aro			SNPseek				C	A	T	G	C	G	A	G	C	A		C	G	G	T	C	C	C	G	G	C	T		T	G	T	T				A	G		G	C	T	T		G
HAP1a	IRIS 313-11073	KHAO DAM::IRGC 29481-3::[IRIS 313-11073]	IRGC 132272	subtrop			SNPseek				C	A	T	G	C	G	A	G	C	A		C	G	G	T	C	C	C	G	G	C	T		T	G	T	T				A	G	A	G	C	T	T		G
HAP1a	IRIS 313-11077	LAI HANG HMA::IRGC 29608-2::[IRIS 313-11077]	IRGC 128522	subtrop			SNPseek				C	A	T	G	C	G	A	G	C	A		C	G	G	T	C	C	C	G	G	C	T		T	G	T	T				A	G	A	G	C	T	T		G
HAP1a	IRIS 313-11093	KHAO TAM::IRGC 30085-2::[IRIS 313-11093]	IRGC 128086	subtrop		sd1	SNPseek				C	A	T	G	C	G	A	G	C	A		C	G	G	T	C	C	C	G	G	C	T		T	G	T	T				A	G	A	G	C	T	T		G
HAP1a	IRIS 313-11094	MAK BOUAP::IRGC 30106-3::[IRIS 313-11094]	IRGC 132274	subtrop			SNPseek				C	A	T	G	C	G	A	G	C	A		C	G	G	T	C	C	C	G	G	C	T		T	G	T	T				A	G	A	G	C	T	T		G
HAP1a	IRIS 313-11100	MAMON::IRGC 30792-1::[IRIS 313-11100]		trop			SNPseek				C	A	T	G	C	G	A	G	C	A		C	G	G	T	C	C	C	G	G	C	T		T	G	T	T				A	G	A	G	C	T	T		G
HAP1a	IRIS 313-11103	D 1-147::IRGC 30894-2::[IRIS 313-11103]	IRGC 132329	trop			SNPseek				C	A	T	G	C	G	A	G	C	A		C	G	G	T	C	C	C	G	G	C	T		T	G	T	T				A	G	A	G	C	T	T		G
HAP1a	IRIS 313-11104	D 3-102::IRGC 30972-1::[IRIS 313-11104]	IRGC 131978	trop			SNPseek				C	A	T	G	C	G	A	G	C	A		C	G	G	T	C	C	C	G	G	C	T		T	G	T	T				A	G	A	G	C	T	T		G
HAP1a	IRIS 313-11106	D 4-193::IRGC 31083-2::[IRIS 313-11106]	IRGC 132330	trop			SNPseek				C	A	T	G	C	G	A	G	C	A		C	G	G	T	C	C	C	G	G	C	T		T	G	T	T				A	G	A	G	C	T	T		G
HAP1a	IRIS 313-11107	ZANTON::IRGC 31248-1::[IRIS 313-11107]	IRGC 132055	trop			SNPseek				C	A	T	G	C	G	A	G	C	A		C	G	G	T	C	C	C	G	G	C	T		T	G	T	T				A	G	A	G	C	T	T
HAP1a	IRIS 313-11108	B 12::IRGC 31293-1::[IRIS 313-11108]	IRGC 127194	ind3			SNPseek				C	A	T	G	C	G	A	G	C	A		C	G	G	T	C	C	C	G	G	C	T		T	G	T	T				A	G	A	G	C	T	T		G
HAP1a	IRIS 313-11109	B 106::IRGC 31352-1::[IRIS 313-11109]	IRGC 128231	trop			SNPseek				C	A	T	G	C	G	A	G	C	A		C	G	G	T	C	C	C	G	G	C	T		T	G	T	T				A	G	A	G	C	T	T		G
HAP1a	IRIS 313-11127	BUBAW::IRGC 32989-2::[IRIS 313-11127]	IRGC 132307	subtrop			SNPseek				C	A	T	G	C	G	A	G	C	A		C	G	G	T	C	C	C	G	G	C	T		T	G	T	T				A	G	A	G	C	T	T		G
HAP1a	IRIS 313-11183	KETAN LEMBAYUNGAN::IRGC 35745-2::[IRIS 313-11183]	IRGC 132311	trop			SNPseek				C	A	T	G	C	G	A	G	C	A		C	G	G	T	C	C	C	G	G	C	T		T	G	T	T				A	G	A	G	C	T	T		G
HAP1a	IRIS 313-11195	KHAW KAR 13::IRGC 36711-1::[IRIS 313-11195]	IRGC 128344	subtrop			SNPseek				C	A	T	G	C	G	A	G	C	A		C	G	G	T	C	C	C	G	G	C	T		T	G	T	T				A	G	A	G	C	T	T		G
HAP1a	IRIS 313-11198	K 78-13::IRGC 36794-2::[IRIS 313-11198]	IRGC 132425	temp			SNPseek				C	A	T	G	C	G	A	G	C	A		C	G	G	T	C	C	C	G	G	C	T		T	G	T	T				A	G	A	G	C	T	T		G
HAP1a	IRIS 313-11201	CHING HSI 15::IRGC 36852-1::[IRIS 313-11201]	IRGC 135564	temp			SNPseek				C	A	T	G	C	G	A	G	C	A		C	G	G	T	C	C	C	G	G	C	T		T	G	T	T				A	G	A	G	C	T	T		G
HAP1a	IRIS 313-11202	4583::IRGC 36894-2::[IRIS 313-11202]	IRGC 127920	temp			SNPseek				C	A	T	G	C	G	A	G	C	A		C	G	G	T	C	C	C	G	G	C	T		T	G	T	T				A	G	A	G	C	T	T		G
HAP1a	IRIS 313-11206	KUMRI::IRGC 37182-2::[IRIS 313-11206]	IRGC 128092	indx			SNPseek				C	A	T	G	C	G	A	G	C	A		C	G	G	T	C	C	C	G	G	C	T		T	G	T	T				A	G	A	G	C	T	T		G
HAP1a	IRIS 313-11246	7516-14::IRGC 40090-3::[IRIS 313-11246]	IRGC 132271	temp			SNPseek				C	A	T	G	C	G	A	G	C	A		C	G	G	T	C	C	C	G	G	C	T		T	G	T	T				A	G	A	G	C	T	T		G
HAP1a	IRIS 313-11297	ARC 13460::IRGC 42732-2::[IRIS 313-11297]	IRGC 127947	admix			SNPseek				C	A	T	G	C	G	A	G	C	A		C	G	G	T	C	C	C	G	G	C	T		T	G	T	T				A	G	A	G	C	T	T		G
HAP1a	IRIS 313-11311	CICIH KAPUK::IRGC 43377-1::[IRIS 313-11311]	IRGC 135745	trop			SNPseek				C	A	T	G	C	G	A	G	C	A		C	G	G	T	C	C	C	G	G	C	T		T	G	T	T				A	G	A	G	C	T	T		G
HAP1a	IRIS 313-11313	PADI RENDAH::IRGC 43515-1::[IRIS 313-11313]	IRGC 128420	trop			SNPseek				C	A	T	G	C	G	A	G	C	A		C	G	G	T	C	C	C	G	G	C	T		T	G	T	T				A	G	A	G	C	T	T		G
HAP1a	IRIS 313-11314	PELAU::IRGC 43538-2::[IRIS 313-11314]	IRGC 132379	trop			SNPseek				C	A	T	G	C	G	A	G	C	A		C	G	G	T	C	C	C	G	G	C	T		T	G	T	T				A	G	A	G	C	T	T		G
HAP1a	IRIS 313-11336	IREQUIN::IRGC 44476-2::[IRIS 313-11336]	IRGC 128519	temp			SNPseek				C	A	T	G	C	G	A	G	C	A		C	G	G	T	C	C	C	G	G	C	T		T	G	T	T				A	G	A	G	C	T	T		G
HAP1a	IRIS 313-11337	LAWA AN::IRGC 44544-2::[IRIS 313-11337]	IRGC 132255	trop			SNPseek				C	A	T	G	C	G	A	G	C	A		C	G	G	T	C	C	C	G	G	C	T		T	G	T	T				A	G	A	G	C	T	T		G
HAP1a	IRIS 313-11340	MINANOK::IRGC 44637-2::[IRIS 313-11340]	IRGC 135639	trop			SNPseek				C	A	T	G	C	G	A	G	C	A		C	G	G	T	C	C	C	G	G	C	T		T	G	T	T				A	G	A	G	C	T	T		G
HAP1a	IRIS 313-11376	TOS 7536::IRGC 46985-2::[IRIS 313-11376]	IRGC 132312	trop			SNPseek				C	A	T	G	C	G	A	G	C	A		C	G	G	T	C	C	C	G	G	C	T		T	G	T	T				A	G	A	G	C	T	T		G
HAP1a	IRIS 313-11426	CHATAO::IRGC 50456-1::[IRIS 313-11426]	IRGC 128260	trop			SNPseek				C	A	T	G	C	G	A	G	C	A		C	G	G	T	C	C	C	G	G	C	T		T	G	T	T				A	G	A	G	C	T	T		G
HAP1a	B002	SANSUIJIN::[B002]	IRGC 136041	temp			SNPseek				C	A	T	G	C		A	G	C	A		C	G	G			C	C	G	G	C	T		T		T	T					G	A	G	C	T
HAP1a	B004	QIUGUANGTENGXI 104::[B004]	IRGC 136031	temp			SNPseek				C	A	T	G	C	G	A	G	C	A		C	G	G	T	C	C	C	G	G	C	T		T	G	T	T				A	G	A	G	C	T	T		G
HAP1a	B005	WANSHI::[B005]	IRGC 136067	temp			SNPseek				C	A	T	G	C	G	A	G	C	A		C	G	G	T	C	C	C	G	G	C	T		T	G	T	T				A	G	A	G	C	T	T		G
HAP1a	B008	BAXIANG::[B008]		temp			SNPseek				C	A	T	G	C	G	A	G	C	A		C	G	G	T	C	C	C	G	G	C	T		T	G	T	T				A	G		G	C	T	T		G
HAP1a	B016	AOMIERTE 168::[B016]	IRGC 135829	temp			SNPseek				C	A	T	G	C	G	A	G	C	A		C	G	G	T	C	C	C	G	G	C	T		T	G	T	T				A	G	A	G	C	T	T		G
HAP1a	B017	AERJITUO::[B017]	IRGC 135822	temp			SNPseek				C	A	T	G	C	G	A	G	C	A		C	G	G	T	C	C	C	G	G	C	T		T	G	T	T				A	G	A	G			T		G
HAP1a	B018	AMERICAN HUANGKEDAO::[B018]	IRGC 135827	trop			SNPseek				C	A	T	G	C	G	A	G	C	A		C	G	G	T	C	C	C	G	G	C	T		T	G	T	T				A	G	A	G	C	T	T		G
HAP1a	B034	ALBANIA RICE::[B034]	IRGC 135825	temp			SNPseek				C	A	T	G	C	G	A	G	C	A		C	G	G	T	C	C	C	G	G	C	T		T	G	T	T				A	G	A	G	C	T	T		G
HAP1a	B036	JIJUCAS CLARO::[B036]	IRGC 135955	japx			SNPseek				C	A	T	G	C	G	A	G	C	A		C	G	G	T	C	C	C	G	G	C	T		T	G	T	T				A	G	A	G	C	T	T		G
HAP1a	B043	YR 83-23-11::[B043]	IRGC 136081	trop			SNPseek				C	A	T	G	C	G	A	G	C	A		C	G	G	T	C	C	C	G	G	C	T		T	G		T				A	G	A	G	C	T	T		G
HAP1a	B045	GONGCHENGXIANG::[B045]	IRGC 135896	temp			SNPseek				C	A	T	G	C	G	A	G	C	A		C	G	G	T	C	C	C	G	G	C	T		T	G	T	T				A	G	A	G	C	T	T		G
HAP1a	B046	QIUTIANXIAOTING::[B046]	IRGC 136032	temp			SNPseek				C	A	T	G	C	G	A	G	C	A		C	G	G	T	C	C	C	G	G	C	T		T	G	T	T				A	G	A	G	C	T	T		G
HAP1a	B054	80050YR72136-43::[B054]	IRGC 135817	trop			SNPseek				C	A	T	G	C	G	A	G	C	A		C	G	G	T	C	C	C	G	G	C	T		T	G	T	T				A	G	A	G	C	T	T		G
HAP1a	B055	YR196::[B055]	IRGC 136080	temp			SNPseek				C		T		C	G	A	G	C	A		C			T	C	C	C	G	G	C				G	T	T					G	A	G		T	T
HAP1a	B056	TIEGANWU::[B056]		temp			SNPseek				C	A	T	G	C	G	A	G	C	A		C	G	G	T	C	C	C	G	G	C	T		T	G	T	T				A	G	A	G	C	T	T		G
HAP1a	B057	XIUSHUI 115::[B057]		temp			SNPseek				C	A	T	G	C	G	A	G	C	A		C	G	G	T	C	C	C	G	G	C	T		T	G	T	T				A	G	A	G	C	T	T		G
HAP1a	B066	GUANGKEXIANGNUO::[B066]		temp			SNPseek				C	A	T	G	C	G	A	G	C	A		C	G	G	T	C	C	C	G	G	C	T		T		T	T				A	G	A	G	C	T	T		G
HAP1a	B068	GAOYANGDIANDAO DAHONGMANG::[B068]		temp			SNPseek				C	A	T	G	C	G	A	G	C	A		C	G	G	T	C	C	C	G	G	C	T		T	G	T	T				A	G	A	G	C	T	T		G
HAP1a	B069	DANDONGLUDAO::[B069]		japx			SNPseek				C	A	T	G	C	G	A	G	C	A		C	G	G	T	C	C	C	G	G	C	T		T		T	T				A	G	A	G	C	T	T		G
HAP1a	B070	LAOGUANGTOU 83::[B070]		japx			SNPseek				C	A	T	G	C	G	A	G	C	A		C	G	G	T	C		C	G	G	C	T		T	G	T					A	G	A	G	C	T	T		G
HAP1a	B071	MUXIQIU::[B071]		temp			SNPseek				C	A	T	G	C	G	A	G	C	A		C	G	G		C	C	C	G	G	C	T		T		T	T				A	G	A	G	C	T	T
HAP1a	B077	YIZHIXIANG::[B077]		temp			SNPseek				C	A	T	G	C	G	A	G	C	A		C			T	C	C	C	G	G	C	T			G	T	T				A	G	A	G	C	T	T		G
HAP1a	B100	HONGKEZHENUO::[B100]		temp			SNPseek				C	A	T	G	C	G	A	G	C	A		C	G	G	T	C	C	C	G	G	C	T		T	G	T	T				A	G	A	G	C	T	T		G
HAP1a	B101	YANGKENUO::[B101]		temp			SNPseek				C				C	G	A	G	C	A		C	G	G		C		C	G	G	C	T		T	G	T					A	G							G
HAP1a	B102	MAGUZI::[B102]		temp			SNPseek				C	A	T	G	C	G	A	G	C	A		C	G	G	T	C	C	C	G	G	C	T		T	G	T	T				A	G	A	G	C	T	T		G
HAP1a	B110	HUANGPINUO::[B110]		temp			SNPseek				C	A	T	G	C	G	A	G	C	A		C	G	G			C	C	G	G	C	T		T		T	T				A	G	A	G	C	T	T		G
HAP1a	B111	ZIMANGFEIE::[B111]		temp			SNPseek				C	A	T	G	C	G	A	G	C	A		C	G	G	T	C	C	C	G	G	C	T		T	G	T	T				A	G	A	G	C	T	T		G
HAP1a	B122	LIAOGENG 287::[B122]		temp			SNPseek				C	A	T	G	C	G	A	G	C	A		C	G	G	T	C	C	C	G	G	C	T		T	G	T	T				A	G	A	G	C	T	T		G
HAP1a	B136	YUYANNUO::[B136]		japx			SNPseek				C	A	T	G	C	G	A	G	C	A		C	G	G	T	C	C	C	G	G	C	T		T	G	T	T				A	G	A	G	C	T	T		G
HAP1a	B144	HUHUI 628::[B144]		japx		sd1	SNPseek				C	A	T	G	C	G	A	G	C	A		C	G	G	T	C	C	C	G	G	C	T		T	G	T	T				A	G	A	G	C	T	T		G
HAP1a	B148	LENGSHUINUO::[B148]		japx			SNPseek				C	A	T	G	C	G	A	G	C	A		C	G	G	T	C	C	C	G	G	C	T		T	G	T	T				A	G	A	G	C	T	T		G
HAP1a	B160	SHUIYUAN 300LI::[B160]		temp			SNPseek				C	A	T	G	C	G	A	G	C	A		C	G	G	T	C	C	C	G	G	C	T			G	T	T				A	G	A	G	C	T	T		G
HAP1a	B162	BAIGEDAO::[B162]		temp			SNPseek				C	A	T	G	C	G	A	G	C	A		C	G	G	T	C	C	C	G	G	C	T		T	G	T	T				A	G	A	G	C	T	T		G
HAP1a	B167	QINGJINZAOSHENG::[B167]	IRGC 136029	temp			SNPseek				C	A	T	G	C	G	A	G	C	A		C	G	G	T	C	C	C	G	G	C	T		T	G	T	T				A	G	A	G	C	T	T		G
HAP1a	B168	ZHUYUAN::[B168]	IRGC 136096	temp			SNPseek				C	A	T	G	C	G	A	G	C	A		C	G	G	T	C	C	C	G	G	C	T		T	G	T	T				A	G	A	G	C	T	T		G
HAP1a	B169	AILUYU::[B169]		temp			SNPseek				C	A	T	G	C	G	A	G	C	A		C	G	G	T	C	C	C	G	G	C	T		T	G	T	T				A	G	A	G	C	T	T		G
HAP1a	B170	HONGSE 90::[B170]	IRGC 135905	temp			SNPseek				C	A	T	G	C	G	A	G	C	A		C	G	G	T	C	C	C	G	G	C	T		T	G	T	T				A	G	A	G	C	T	T		G
HAP1a	B171	LINGUO::[B171]	IRGC 135974	temp			SNPseek				C	A	T	G	C	G	A	G	C	A		C	G	G	T	C	C	C	G	G	C	T		T		T	T				A	G	A	G	C	T	T		G
HAP1a	B179	KELUODUO B::[B179]	IRGC 135966	temp			SNPseek				C	A	T	G	C	G	A	G	C	A		C	G	G	T	C	C	C	G	G	C	T		T	G	T	T				A	G	A	G	C	T	T		G
HAP1a	B182	CHIMAO::[B182]		temp			SNPseek				C	A	T	G	C	G	A	G	C	A		C	G	G	T	C	C	C	G	G	C	T		T	G	T	T				A	G	A	G	C	T	T		G
HAP1a	B183	QINGNUO KYOHATAMOCHI::[B183]	IRGC 136030	temp			SNPseek				C	A	T	G	C	G	A	G	C	A		C	G	G	T	C	C	C	G	G	C	T		T		T	T				A	G	A	G	C	T	T		G
HAP1a	B188	IRAT 36::[B188]	IRGC 135944	trop			SNPseek				C	A	T	G	C	G	A	G	C	A		C	G	G	T	C	C	C	G	G	C	T		T	G	T	T				A	G	A	G	C	T	T		G
HAP1a	B189	IRAT 669::[B189]	IRGC 135945	trop			SNPseek				C	A	T	G	C	G	A	G	C	A		C	G	G	T	C	C	C	G	G	C	T		T	G	T	T				A	G	A	G	C	T	T		G
HAP1a	B190	ITA 221::[B190]		trop			SNPseek				C	A	T	G	C	G	A	G	C	A		C		G	T	C	C	C	G	G	C	T		T	G	T	T				A	G	A	G	C	T	T		G
HAP1a	B191	80A60YR71009-1-5::[B191]	IRGC 135818	trop			SNPseek				C	A	T	G	C	G	A	G	C	A		C	G	G	T	C	C	C	G	G	C	T		T	G	T	T				A	G	A	G	C	T	T		G
HAP1a	B199	HONGMISANDAN::[B199]		temp			SNPseek				C	A	T	G	C	G	A	G	C	A		C	G	G	T	C	C	C	G	G	C			T	G	T	T				A	G	A	G	C	T	T		G
HAP1a	B204	LONGHUAMAOHU::[B204]		temp			SNPseek				C	A	T	G	C	G	A	G	C	A		C	G	G	T	C	C	C	G	G	C	T		T	G	T	T				A	G	A	G	C	T	T		G
HAP1a	B212	CHIKENUO::[B212]		temp			SNPseek				C	A	T	G	C	G	A	G	C	A		C	G	G	T	C	C	C	G	G	C	T		T	G	T	T				A	G	A	G	C	T	T		G
HAP1a	B215	HONGQI 5::[B215]	IRGC 135904	temp			SNPseek				C	A	T	G	C	G	A	G	C	A		C	G	G	T	C	C	C	G	G	C	T		T	G	T	T				A	G	A	G	C	T	T		G
HAP1a	B218	WUZIDUI::[B218]		temp			SNPseek				C	A	T	G	C	G	A	G	C	A		C	G	G	T	C	C	C	G	G	C	T		T	G	T	T				A	G	A	G	C	T	T		G
HAP1a	B223	CUNGUNUO::[B223]		temp			SNPseek				C	A	T	G	C			G		A		C	G	G	T	C	C	C	G	G	C	T		T	G	T	T				A	G	A	G	C	T	T
HAP1a	B225	GUANTUIBAIHE 1::[B225]		temp			SNPseek				C	A	T	G	C	G	A	G	C	A		C	G	G	T	C	C	C	G	G	C	T		T	G	T	T				A	G	A	G	C	T	T		G
HAP1a	B226	HEIMANGDAO::[B226]		temp			SNPseek				C	A	T	G	C	G	A	G	C	A		C	G	G	T	C	C	C	G	G	C	T		T	G		T				A	G	A	G	C	T	T		G
HAP1a	B228	HAOBAYONG 1::[B228]		japx			SNPseek				C	A	T	G	C	G	A	G	C	A		C	G	G	T	C	C	C	G	G	C	T		T	G	T	T				A	G	A	G	C	T	T		G
HAP1a	B230	BANJIEMANG2::[B230]		japx			SNPseek				C	A	T	G	C	G	A	G	C	A		C	G	G	T	C	C	C	G	G	C	T		T	G	T	T				A	G	A	G	C	T	T		G
HAP1a	B235	ZHONGHUA 8::[B235]		temp			SNPseek				C	A	T	G	C	G	A	G	C	A		C	G	G	T	C	C	C	G	G	C	T		T	G	T	T				A	G	A	G	C	T	T		G
HAP1a	B236	JINDAO 1::[B236]	IRGC 135957	temp			SNPseek				C	A	T	G	C	G	A	G	C	A		C	G	G	T	C	C	C	G	G	C	T		T	G	T	T				A	G	A	G	C	T	T		G
HAP1a	B240	ZHENGDAO 5::[B240]		temp			SNPseek				C	A	T	G	C	G	A	G	C	A		C	G	G	T	C	C	C	G	G	C	T		T	G	T	T				A	G	A	G	C	T	T		G
HAP1a	B241	LAMUJIA::[B241]		subtrop			SNPseek				C	A	T	G	C	G	A	G	C	A		C	G		T	C	C	C	G	G	C	T		T	G	T	T				A	G	A	G	C	T	T		G
HAP1a	B245	SHANJIUGU::[B245]		subtrop			SNPseek				C	A	T	G	C	G	A	G	C	A		C	G	G	T	C	C	C	G	G	C	T		T	G	T	T				A	G	A	G	C	T	T		G
HAP1a	B250	ANNONGWANGENG B::[B250]		temp			SNPseek				C	A	T	G	C	G	A	G	C	A		C	G	G	T	C	C	C	G	G	C	T		T	G	T	T				A	G	A	G	C	T	T		G
HAP1a	B258	XINGGUO::[B258]		temp			SNPseek				C	A	T	G	C	G	A	G	C	A		C	G	G	T	C	C	C	G	G	C	T		T	G	T	T				A	G	A	G	C	T	T		G
HAP1a	B263	WEIGUO::[B263]		temp			SNPseek				C	A	T	G	C	G	A	G	C	A		C	G	G	T	C	C	C	G	G	C	T		T	G	T	T				A	G	A	G	C	T	T		G
HAP1a	B266	HAOMAKE (K)::[B266]		subtrop			SNPseek				C	A	T	G	C	G	A	G	C	A		C	G	G	T	C	C	C	G	G	C	T		T	G	T	T				A	G	A	G	C	T	T		G
HAP1a	B269	YUEFU::[B269]	IRGC 136083	temp			SNPseek				C	A	T	G	C	G	A	G	C	A		C	G	G	T	C	C	C	G	G	C	T		T	G	T	T				A	G	A	G	C	T	T		G
HAP1a	CX109	DACCA6::[CX109]	IRGC 135876	japx			SNPseek				C	A	T	G	C	G	A	G	C	A		C	G	G	T	C	C	C	G	G	C	T		T	G	T	T				A	G	A	G	C	T	T		G
HAP1a	CX111	GIZA14::[CX111]	IRGC 135894	trop			SNPseek				C	A	T	G	C	G	A	G	C	A		C	G	G	T	C	C	C	G	G	C	T		T	G	T	T				A	G	A	G	C	T	T		G
HAP1a	CX113	BINIAPAN::[CX113]	IRGC 135846	trop			SNPseek				C	A	T	G	C	G	A	G	C	A		C	G	G	T	C		C	G	G	C	T		T	G	T					A	G	A	G	C		T		G
HAP1a	CX116	WUDADAOZHONG::[CX116]	IRGC 136070	temp			SNPseek				C	A	T	G	C	G	A	G	C	A		C	G	G	T	C	C	C	G	G	C	T		T	G	T	T				A	G	A	G	C	T	T		G
HAP1a	CX120	TKM6::[CX120]	IRGC 136057	indx			SNPseek				C	A	T	G	C	G	A	G	C	A		C	G	G	T	C	C	C	G	G	C	T		T	G	T	T				A	G	A	G		T	T		G
HAP1a	CX132	AP423::[CX132]	IRGC 135830	trop			SNPseek				C	A	T	G	C	G	A	G	C	A		C	G	G	T	C	C	C	G	G	C	T		T	G	T	T				A	G	A	G	C	T	T		G
HAP1a	CX138	QD_441::[CX138]		japx			SNPseek				C	A	T	G	C	G	A	G	C	A		C	G	G	T	C	C	C	G	G	C	T		T	G	T	T				A	G	A	G	C	T	T		G
HAP1a	CX14	CHENNONG 265::[CX14]		temp			SNPseek				C	A	T	G	C	G	A	G	C	A		C	G	G	T	C	C	C	G	G	C	T		T	G	T	T				A	G	A	G	C	T	T		G
HAP1a	CX140	NIPPONBARE::[CX140]	IRGC 136196	temp			SNPseek				C	A	T	G	C	G	A	G	C	A		C	G	G	T	C	C	C	G	G	C	T		T	G	T	T				A	G	A	G	C	T	T		G
HAP1a	CX142	AI YEH LU::[CX142]	IRGC 135823	japx			SNPseek				C	A	T	G	C	G	A	G	C	A		C	G	G	T	C	C	C	G	G	C	T		T	G	T	T				A	G	A	G	C	T	T		G
HAP1a	CX15	Y134::[CX15]	IRGC 136077	ind1B		sd1	SNPseek				C	A	T	G	C	G	A	G	C	A		C	G	G	T	C	C	C	G	G	C	T		T	G	T	T				A	G	A	G	C	T	T		G
HAP1a	CX151	AZUCENA::[CX151]	IRGC 117264	trop			SNPseek				C	A	T	G	C	G	A	G	C	A		C	G	G	T	C	C	C	G	G	C	T		T	G	T	T				A	G	A	G	C	T	T		G
HAP1a	CX16	YUAN JING 7::[CX16]		temp			SNPseek				C	A	T	G	C	G	A	G	C	A		C	G	G	T	C	C	C	G	G	C	T		T	G	T	T				A	G	A	G	C	T	T		G
HAP1a	CX165	WUYUGENG 3::[CX165]	IRGC 136071	temp			SNPseek				C	A	T	G	C	G	A	G	C	A		C	G	G	T	C	C	C	G	G	C	T		T	G	T	T				A	G	A	G	C	T	T		G
HAP1a	CX205	IR69428-6-1-1-3-3::[CX205]	IRGC 135935	japx			SNPseek				C	A	T	G	C	G	A	G	C	A		C	G	G	T	C	C	C	G	G	C	T		T	G	T	T				A	G	A	G	C	T	T		G
HAP1a	CX211	M3122::[CX211]		temp			SNPseek				C	A	T	G	C	G	A	G	C	A		C	G	G	T	C	C	C	G	G	C	T		T	G	T	T				A	G	A	G	C	T	T		G
HAP1a	CX212	NONGKEN 58::[CX212]	IRGC 136009	temp			SNPseek				C	A	T	G	C	G	A	G	C	A		C	G	G	T	C	C	C	G	G	C	T		T	G	T	T				A	G			C	T	T		G
HAP1a	CX214	BRAZIL NUODAO::[CX214]	IRGC 135849	trop			SNPseek				C	A	T	G	C	G	A	G	C	A		C	G	G	T	C	C	C	G	G	C	T		T	G	T	T				A	G	A	G		T	T		G
HAP1a	CX220	IRAT109::[CX220]	IRGC 135941	trop			SNPseek				C	A	T	G	C	G	A	G	C	A		C	G	G	T	C	C	C	G	G	C	T		T	G	T	T				A	G	A	G	C	T	T		G
HAP1a	CX248	KINANDANGPATONG::[CX248]	IRGC 135970	trop			SNPseek				C	A	T	G	C	G	A	G	C	A		C	G	G	T	C	C	C	G	G	C	T		T	G	T	T				A	G	A	G	C	T	T		G
HAP1a	CX251	XUDAO 4::[CX251]		temp			SNPseek				C	A	T	G	C	G	A	G	C	A		C	G	G	T	C	C	C	G	G	C	T		T	G	T	T				A	G	A	G	C	T	T		G
HAP1a	CX262	IAC3::[CX262]	IRGC 135912	trop			SNPseek				C	A	T	G	C	G	A	G	C	A		C	G	G	T	C	C	C	G	G	C	T		T	G	T	T				A	G	A	G	C	T			G
HAP1a	CX269	IAC165::[CX269]	IRGC 135911	trop			SNPseek				C	A	T	G	C	G	A	G	C	A		C	G	G	T	C	C	C	G	G	C	T		T	G	T	T				A	G	A	G	C	T	T		G
HAP1a	CX277	02428-IL::[CX277]	IRGC 135810	japx			SNPseek				C	A	T	G	C	G	A	G	C	A		C	G	G	T	C	C	C	G	G	C	T		T	G	T	T				A	G	A	G	C	T	T		G
HAP1a	CX287	C52::[CX287]		temp			SNPseek				C	A	T	G	C	G	A	G	C	A		C	G	G	T	C	C	C	G	G	C	T		T	G	T	T				A	G	A	G	C	T	T		G
HAP1a	CX30	MR185::[CX30]	IRGC 135991	ind1B			SNPseek				C	A	T	G	C	G	A	G	C	A		C	G	G	T	C	C	C	G	G	C	T		T	G	T	T				A	G	A	G	C	T	T		G
HAP1a	CX306	MONGOLIA RICE::[CX306]	IRGC 135987	temp			SNPseek				C	A	T	G	C	G	A	G	C	A		C	G	G	T	C	C	C	G	G	C	T		T	G	T	T				A	G	A	G	C	T	T		G
HAP1a	CX315	ZIDAO::[CX315]	IRGC 136097	temp		sd1	SNPseek				C	A	T	G	C	G	A	G	C	A		C	G	G	T	C	C	C	G	G	C	T		T	G	T	T				A	G	A	G	C	T	T		G
HAP1a	CX317	MR19::[CX317]	IRGC 135992	temp			SNPseek				C	A	T	G	C	G	A	G	C	A		C	G	G	T	C	C	C	G	G	C	T		T	G	T	T				A	G	A	G	C	T	T		G
HAP1a	CX329	JINCHUANYIHAO::[CX329]	IRGC 135956	temp			SNPseek				C	A	T	G	C	G	A	G	C	A		C	G	G	T	C	C	C	G	G	C	T		T	G	T	T				A	G	A	G	C	T	T		G
HAP1a	CX330	YUEGUANG::[CX330]	IRGC 136084	temp		sd1	SNPseek				C	A	T	G	C	G	A	G	C	A		C	G	G	T	C	C	C	G	G	C	T		T	G	T	T				A	G	A	G		T	T		G
HAP1a	CX344	HEXI 41::[CX344]		temp			SNPseek				C	A	T	G	C	G	A	G	C	A		C	G	G	T	C	C	C	G	G	C	T		T	G	T	T				A	G	A	G	C	T	T		G
HAP1a	CX345	YUNGENG 23::[CX345]		temp			SNPseek				C	A	T	G	C	G	A	G	C	A		C	G	G	T	C	C	C	G	G	C	T		T	G	T	T				A	G	A	G	C	T	T		G
HAP1a	CX350	WUYUGENG 20::[CX350]		temp			SNPseek				C	A	T	G	C	G	A	G	C	A		C	G	G	T	C	C	C	G	G	C	T		T	G	T	T				A	G	A	G	C	T	T		G
HAP1a	CX351	053A-3::[CX351]	IRGC 135811	temp			SNPseek				C	A	T	G	C	G	A	G	C	A		C	G	G	T	C	C	C	G	G	C	T		T	G	T	T				A	G	A	G	C	T	T		G
HAP1a	CX355	YUNLU 102::[CX355]	IRGC 136085	trop			SNPseek				C	A	T	G	C	G	A	G	C	A		C	G	G	T	C	C	C	G	G	C	T		T	G	T	T				A	G	A	G	C	T	T		G
HAP1a	CX356	YANDAO 8::[CX356]		temp			SNPseek				C	A	T	G	C	G	A	G	C	A		C	G	G	T	C	C	C	G	G	C	T		T	G	T	T				A	G	A	G	C	T	T		G
HAP1a	CX359	YUNLU 103::[CX359]		trop			SNPseek				C	A	T	G	C	G	A	G	C	A		C	G	G	T	C	C	C	G	G	C	T		T	G	T	T					G	A	G		T	T		G
HAP1a	CX372	NERICA 2::[CX372]	IRGC 136001	trop			SNPseek				C	A	T	G	C	G	A	G	C	A		C	G	G	T	C	C	C	G	G	C	T		T	G	T					A	G	A	G	C	T	T		G
HAP1a	CX374	NERICA 9::[CX374]	IRGC 136003	trop			SNPseek				C	A	T	G	C	G	A	G	C	A		C	G	G	T	C	C	C	G	G	C	T		T	G	T	T				A	G	A	G	C	T	T		G
HAP1a	CX380	YANDAO 9::[CX380]		temp			SNPseek				C	A	T	G	C	G	A	G	C	A		C	G	G	T	C	C	C	G	G	C	T		T	G	T	T				A	G	A	G	C	T	T		G
HAP1a	CX384	FENGZA::[CX384]		temp			SNPseek				C	A	T	G	C	G	A	G	C	A		C	G	G	T	C	C	C	G	G	C	T		T	G		T				A	G	A	G	C	T	T		G
HAP1a	CX391	YJ30::[CX391]	IRGC 136079	temp			SNPseek				C	A	T	G	C	G	A	G	C	A		C	G	G	T	C	C	C	G	G	C	T		T	G	T	T				A	G	A	G	C	T	T		G
HAP1a	CX396	GUANDONG 194 (SOFT RICE)::[CX396]	IRGC 135898	temp			SNPseek				C	A	T	G	C	G	A	G	C	A		C	G	G	T	C	C	C	G	G	C	T		T	G	T	T				A	G	A	G	C	T	T		G
HAP1a	CX397	NANGENG 46 (SOFT RICE)::[CX397]		temp			SNPseek				C	A	T	G	C	G	A	G	C	A		C	G	G	T	C	C	C	G	G	C	T		T	G	T	T				A	G	A	G	C	T	T		G
HAP1a	CX47	DIANGENG::[CX47]	IRGC 135879	temp			SNPseek				C	A	T	G	C	G	A	G	C	A		C	G	G	T	C	C	C	G	G	C	T		T	G	T	T				A	G	A	G	C	T	T		G
HAP1a	CX534	TONGNIAN 1::[CX534]	IRGC 136059	temp			SNPseek				C	A	T	G	C	G	A	G	C	A		C	G	G	T	C	C	C	G	G	C	T		T	G	T	T				A	G	A	G	C	T	T		G
HAP1a	CX56	YUNGUANG 8::[CX56]		temp			SNPseek				C	A	T	G	C	G	A	G	C	A		C	G		T	C	C	C	G	G	C				G	T	T				A	G	A	G	C		T		G
HAP1a	CX58	GIZA159::[CX58]	IRGC 135895	temp			SNPseek				C	A	T	G	C	G	A	G	C	A		C	G	G	T	C	C	C	G	G	C	T		T	G	T	T				A	G	A	G	C	T	T		G
HAP1a	CX74	JP-5::[CX74]	IRGC 135961	temp			SNPseek				C	A	T	G	C	G	A	G	C	A		C	G	G	T	C	C	C	G	G	C	T		T	G	T	T				A	G	A	G	C	T	T		G
HAP1a	CX77	LEMONT::[CX77]	IRGC 117802	trop			SNPseek				C	A	T	G	C	G	A	G	C	A		C	G	G	T	C	C	C	G	G	C	T		T	G	T	T				A	G	A	G	C	T	T		G
HAP1a	CX78	M401::[CX78]	IRGC 135978	temp			SNPseek				C	A	T	G	C	G	A	G	C	A		C	G	G	T	C	C	C	G	G	C	T		T	G	T	T				A	G	A	G	C	T	T		G
HAP1a	CX427	CX427::[CX427]		temp			SNPseek				C	A	T	G	C	G	A	G	C	A		C	G	G	T	C	C		G	G	C	T		T	G	T	T				A	G	A	G	C	T	T		G
HAP1a	CX428	CX428::[CX428]		temp			SNPseek				C	A	T	G	C	G	A	G	C	A		C	G	G	T	C	C	C	G	G	C	T		T	G	T	T				A	G	A	G	C	T	T		G
HAP1a	CX429	CX429::[CX429]		temp			SNPseek				C	A	T	G	C	G	A	G	C	A		C	G	G	T	C	C	C	G	G	C	T		T	G	T	T				A	G	A	G	C	T	T		G
HAP1a	CX578	CX578::[CX578]		temp			SNPseek				C	A	T	G	C	G	A	G	C	A		C	G	G	T	C	C	C	G	G	C	T		T	G	T	T				A	G	A	G	C	T	T		G
HAP1a	CX579	CX579::[CX579]		admix			SNPseek				C	A	T	G	C	G	A	G	C	A		C	G	G	T	C	C	C	G	G	C	T		T	G	T	T				A	G	A	G	C	T	T		G
HAP1a	IRIS 313-8976	SKY BONNET::IRGC 66759-1::[IRIS 313-8976]	IRGC 125902	trop			SNPseek				C	A	T	G	C	G	A	G	C	A		C	G	G	T	C	C	C	G	G	C	T		T	G	T	T				A	G	A	G	C	T	T		G
HAP1a	IRIS 313-10485	CATIBOS::IRGC 3762-1::[IRIS 313-10485]	IRGC 127248	trop			SNPseek				C	A	T	G	C	G	A	G	C	A		C	G	G	T	C	C	C	G	G	C	T		T	G	T	T				A	G	A	G	C	T	T		G
HAP1a	IRIS 313-10788	LEMUNGSIR::IRGC 18116-1::[IRIS 313-10788]	IRGC 135769	trop			SNPseek				C	A	T	G	C	G	A	G	C	A		C	G	G	T	C	C	C	G	G	C	T		T	G	T	T				A	G	A	G	C	T	T		G
HAP1a	CX139	AMARELES::[CX139]	IRGC 135826	japx			SNPseek				C	A	T	G	C	G	A	G	C	A		C	G	G	T	C	C	C	G	G	C	T		T	G	T	T				A	G	A	G	C	T	T		G
HAP1a	IRIS 313-10056	HOKURIKU 52::IRGC 72491-1::[IRIS 313-10056]	IRGC 125763	subtrop			SNPseek				C	A	T	G	C	G	A	G	C	A		C	G	G	T	C	C	C	G	G	C	T		T	G	T	T				A	G	A	G	C	T	T		G
HAP1b	IRIS 313-12164	PA YANG NOEUGN::IRGC 87778-1::[IRIS 313-12164]	IRGC 127723	japx	A_9		De novo assembled	G	C	A	C	A	T	G	C	G	A	G	C	A	T	C	G	G	T	C	C	C	G	T	C	T	T	T	G	T	T	N			A	G	A	G	C	T	T		G
HAP1b	IRIS 313-11030	MUTANT 12-42::IRGC 28076-1::[IRIS 313-11030]		aro	A_9		De novo assembled	G	C	A	C	A	T	G	C	G	A	G	C	A	T	C	G	G	T	C	C	C	G	T	C	T	T	T	G	T	T	N			A	G	A	G	C	T	T		G
HAP1b	IRIS 313-8256	GERDEH::[IRIS 313-8256]	IRGC 117474	japx	A_9		De novo assembled	G	C	A	C	A	T	G	C	G	A	G	C	A	T	C	G	G	T	C	C	C	G	T	C	T	T	T	G	T	T	N			A	G	A	G	C	T	T		G
HAP1b	IRIS 313-7870	CUIABANA::IRTP 17401-C1::[IRIS 313-7870]	IRGC 122027	japx	A_9		De novo assembled	G	C	A	C	A	T	G	C	G	A	G	C	A	T	C	G	G	T	C	C	C	G	T	C	T	T	T	G	T	T	N			A	G	A	G	C	T	T		G
HAP1b	IRIS 313-11136	NGAKWE THETYIN::IRGC 33477-2::[IRIS 313-11136]	IRGC 128117	admix	A_9		De novo assembled	G	C	A	C	A	T	G	C	G	A	G	C	A	T	C	G	G	T	C	C	C	G	T	C	T	T	T	G	T	T	N			A	G	A	G	C	T	T		G
HAP1b	CX104	SADRI RICE 1::[CX104]	IRGC 136037	aro	A_9		De novo assembled	G	C	A	C	A	T	G	C	G	A	G	C	A	T	C	G	G	T	C	C	C	G	T	C	T	T	T	G	T	T	N			A	G	A	G	C	T	T		G
HAP1b	IRIS 313-11070	TUPA::IRGC 29432-1::[IRIS 313-11070]	IRGC 127239	admix	A_9		De novo assembled	G	C	A	C	A	T	G	C	G	A	G	C	A	T	C	G	G	T	C	C	C	G	T	C	T	T	T	G	T	T	N			A	G	A	G	C	T	T		G
HAP1b	IRIS 313-11375	CODE NO 31225::IRGC 46865-2::[IRIS 313-11375]	IRGC 128018	aro	A_9		De novo assembled	G	C	A	C	A	T	G	C	G	A	G	C	A	T	C	G	G	T	C	C	C	G	T	C	T	T	T	G	T	T	N			A	G	A	G	C	T	T		G
HAP1b	IRIS 313-10776	KABADOKA::IRGC 17775-2::[IRIS 313-10776]	IRGC 132343	trop	A_9		De novo assembled	G	C	A	C	A	T	G	C	G	A	G	C	A	T	C	G	G	T	C	C	C	G	T	C	T	T	T	G	T	T	N			A	G	A	G	C	T	T		G
HAP1b	IRIS 313-11542	KHAO KUM PAR::IRGC 57966-1::[IRIS 313-11542]	IRGC 132402	admix	A_9		De novo assembled	G	C	A	C	A	T	G	C	G	A	G	C	A	T	C	G	G	T	C	C	C	G	T	C	T	T	T	G	T	T	N			A	G	A	G	C	T	T		G
HAP1b	IRIS 313-10722	GODAWEL::IRGC 15750-1::[IRIS 313-10722]	IRGC 128301	trop	A_11		De novo assembled	G	C	A	C	A	T	G	C	G	A	G	C	A	T	C	G	G	T	C	C	C	G	T	C	T	T	T	G	T	T	N			A	G	A	G	C	T	T		G
HAP1b	IRIS 313-10507	HSIANG TSENF TAO::IRGC 5008-1::[IRIS 313-10507]	IRGC 128311	trop	A_9		De novo assembled	G	C	A	C	A	T	G	C	G	A	G	C	A	T	C	G	G	T	C	C	C	G	T	C	T	T	T	G	T	T	N			A	G	A	G	C	T	T		G
HAP1b	IRIS 313-9558	LIMBAYAN::IRGC 71556-1::[IRIS 313-9558]	IRGC 126302	trop	A_9		De novo assembled	G	C	A	C	A	T	G	C	G	A	G	C	A	T	C	G	G	T	C	C	C	G	T	C	T	T	T	G	T	T	N			A	G	A	G	C	T	T		G
HAP1b	IRIS 313-11627	JADO::IRGC 61966-1::[IRIS 313-11627]	IRGC 127448	aro	A_9		De novo assembled	G	C	A	C	A	T	G	C	G	A	G	C	A	T	C	G	G	T	C	C	C	G	G/T	C	T	T	T	G	T	T	N			A	G	A	G	C	T	T		G
HAP1b	IRIS 313-10580	PARAY KINARABAW::IRGC 8083-1::[IRIS 313-10580]	IRGC 127718	trop	A_9		De novo assembled	G	C	A	C	A	T	G	C	G	A	G	C	A	T	C	G	G	T	C	C	C	G	T	C	T	T	T	G	T	T	N			A	G	A	G	C	T	T		G
HAP1b	IRIS 313-9601	CHAWAL::IRGC 73090-1::[IRIS 313-9601]	IRGC 121606	aro	D_1		De novo assembled	G	C	A	C	A	T	G	C	G	A	G	C	A	T	C	G	G	T	C	C	C	G	T	C	T	T	T	G	T	T	N			A	G	A	G	C	T	T		G
HAP1b	IRIS 313-11270	ARC 14663::IRGC 41671-2::[IRIS 313-11270]	IRGC 127959	aro	A_9		De novo assembled	G	C	A	C	A	T	G	C	G	A	G	C	A	T	C	G	G	T	C	C	C	G	T	C	T	T	T	G	T	T	N			A	G	A	G	C	T	T
HAP1b	IRIS 313-10851	ARC 7296::IRGC 20585-1::[IRIS 313-10851]	IRGC 132387	aro	A_9		De novo assembled	G	C	A	C	A	T	G	C	G	A	G	C	A	T	C	G	G	T	C	C	C	G	T	C	T	T	T	G	T	T	N			A	G	A	G	C	T	T
HAP1b	IRIS 313-11259	ARC 13515::IRGC 41134-2::[IRIS 313-11259]	IRGC 127949	aro	A_3		De novo assembled	G	C	A	C	A	T	G	C	G	A	G	C	A	T	C	N	N	T	C	C	C	G	T	C	T	T	T	G	T	T	N			A	G	A	G	C	T	T		G
HAP1b	IRIS 313-15909	IET 14720::IRTP 23179-G1::[IRIS 313-15909]	IRGC 126958	aro			SNPseek				C	A	T	G	C	G	A	G	C	A		C	G	G	T	C	C	C	G	T	C	T		T	G	T	T				A	G	A	G	C	T	T		G
HAP1b	IRIS 313-8712	ARC 13829::[IRIS 313-8712]	IRGC 117426	aro			SNPseek				C	A	T	G	C	G	A	G	C	A		C	G	G	T	C	C	C	G	T	C	T		T	G	T	T				A	G	A	G	C	T	T		G
HAP1b	IRIS 313-8747	DOM ZARD::[IRIS 313-8747]	IRGC 117466	aro			SNPseek				C	A	T	G	C	G	A	G	C	A		C	G	G	T	C	C	C	G	T	C	T		T	G	T	T				A	G	A	G	C	T	T		G
HAP1b	IRIS 313-8813	ARC 10497::[IRIS 313-8813]	IRGC 117425	aro			SNPseek				C	A	T	G	C	G	A	G	C	A		C	G	G	T	C	C	C	G	T	C	T		T	G	T	T				A	G	A	G	C		T		G
HAP1b	IRIS 313-8814	SHANKA::IRGC 67848-1::[IRIS 313-8814]	IRGC 121499	aro			SNPseek				C	A	T	G	C	G	A	G	C	A		C	G	G	T	C	C	C	G	T	C	T		T	G	T	T				A	G	A	G	C	T	T		G
HAP1b	IRIS 313-9629	JC 157::[IRIS 313-9629]	IRGC 117498	aro			SNPseek				C	A	T	G	C	G	A	G	C	A		C	G	G	T	C	C	C	G	T	C	T		T	G	T	T				A	G	A	G	C	T	T		G
HAP1b	IRIS 313-10152	KETAN MENAH::IRGC 48733-1::[IRIS 313-10152]	IRGC 125798	trop			SNPseek				C	A	T	G	C	G	A	G	C	A		C	G	G	T	C	C	C	G	T	C	T		T	G	T	T				A	G	A	G	C	T	T		G
HAP1b	IRIS 313-8664	SITORU::IRGC 66669-1::[IRIS 313-8664]		trop			SNPseek				C	A	T	G	C	G	A	G	C	A		C	G	G	T	C	C	C	G	T	C	T		T	G	T	T				A	G	A	G	C	T	T		G
HAP1b	IRIS 313-8326	JC 1::[IRIS 313-8326]	IRGC 117494	aro			SNPseek				C	A	T	G	C	G	A	G	C	A		C	G	G	T	C	C	C	G	T	C	T		T	G	T	T				A	G	A	G	C	T	T		G
HAP1b	IRIS 313-9083	PANKHARI 203::[IRIS 313-9083]	IRGC 117551	aro			SNPseek				C	A	T	G	C	G	A	G	C	A		C	G	G	T	C	C	C		T	C	T		T	G	T	T				A	G	A	G	C	T			G
HAP1b	IRIS 313-8268	CHHOTE DHAN::[IRIS 313-8268]	IRGC 117446	aro			SNPseek				C	A	T	G	C	G	A	G	C	A		C	G	G	T	C	C	C	G	T	C	T		T	G	T					A	G	A	G	C	T	T		G
HAP1b	IRIS 313-8498	ARC 7091::IRGC 20491-1::[IRIS 313-8498]	IRGC 126176	aro			SNPseek				C	A	T		C	G	A	G	C	A		C	G	G			C	C	G	G/T	C	T		T	G		T				A		A	G	C/T	T			G
HAP1b	IRIS 313-8745	SD 120 SELN (CI 12320)::IRGC 1667-1::[IRIS 313-8745]	IRGC 126087	trop			SNPseek				C	A	T	G	C	G	A	G	C	A		C	G	G	T	C	C	C	G	T	C	T		T	G	T	T				A	G	A	G	C	T	T		G
HAP1b	IRIS 313-9616	INITLOG DALAG::IRGC 67436-1::[IRIS 313-9616]	IRGC 127051	trop			SNPseek				C	A	T	G	C	G	A	G	C	A		C	G	G	T	C	C	C	G	T	C	T		T	G	T	T				A	G	A	G	C	T	T		G
HAP1b	IRIS 313-9239	RIMBUN::IRGC 43741-1::[IRIS 313-9239]	IRGC 126268	trop			SNPseek				C	A	T	G	C	G	A	G	C	A		C	G	G	T	C	C	C	G	T	C	T		T	G	T	T				A	G	A	G	C	T	T		G
HAP1b	IRIS 313-8385	JC 149::[IRIS 313-8385]	IRGC 117497	aro			SNPseek				C	A	T	G	C	G	A	G	C	A		C	G	G	T	C	C	C	G	T	C	T		T	G	T	T				A	G	A	G	C	T	T		G
HAP1b	IRIS 313-9053	ARC 12536::IRGC 41068-1::[IRIS 313-9053]	IRGC 125644	admix			SNPseek				C	A	T	G	C	G	A		C	A		C	G	G	T	C	C	C	G	T	C	T		T	G	T	T				A	G	A	G	C	T	T		G
HAP1b	IRIS 313-9445	KOIYA DIGHA::IRGC 63517-1::[IRIS 313-9445]	IRGC 125806	admix			SNPseek				C	A	T	G	C	G	A	G	C	A		C	G	G	T	C	C	C	G	T	C	T		T	G	T	T				A	G	A	G	C	T	T		G
HAP1b	IRIS 313-10051	TSIVIMBININA::IRGC 69890-1::[IRIS 313-10051]	IRGC 127067	trop			SNPseek				C	A	T	G	C	G	A	G	C	A		C	G	G	T	C	C	C	G	T	C	T		T	G	T	T				A	G		G	C	T	T		G
HAP1b	IRIS 313-8765	TIMMURAY::IRGC 67857-1::[IRIS 313-8765]	IRGC 126284	aro			SNPseek				C	A	T	G	C	G	A	G	C	A		C	G	G	T	C	C	C	G	T	C	T		T	G	T	T				A	G	A	G	C	T	T		G
HAP1b	IRIS 313-9170	TK DEEP STRAW 34-786::IRGC 38522-1::[IRIS 313-9170]		aro			SNPseek				C	A	T	G	C	G	A	G	C	A		C	G	G	T	C	C	C	G	T	C	T		T	G	T	T				A	G	A	G	C	T	T		G
HAP1b	IRIS 313-8656	BASMATI 1::IRGC 27798-1::[IRIS 313-8656]	IRGC 126046	aro			SNPseek				C	A	T	G	C	G	A	G	C	A		C	G	G	T	C	C	C	G	T	C	T		T	G	T	T				A	G	A	G	C	T	T		G
HAP1b	IRIS 313-9172	ARC 7229::IRGC 12331-1::[IRIS 313-9172]	IRGC 126177	aro			SNPseek				C	A	T	G	C	G	A	G	C	A		C	G	G	T	C	C	C	G	T	C	T		T	G	T	T				A	G	A	G	C	T	T		G
HAP1b	IRIS 313-9201	ARC 6044::IRGC 12190-1::[IRIS 313-9201]	IRGC 126146	trop			SNPseek				C	A	T	G	C	G	A	G	C	A		C	G	G	T	C	C	C	G	T	C	T		T	G	T	T				A	G	A	G	C	T	T		G
HAP1b	IRIS 313-10032	NS 1576::IRGC 68951-1::[IRIS 313-10032]	IRGC 125858	aro			SNPseek				C	A	T	G	C	G	A	G	C	A		C	G	G	T	C	C	C	G	T	C	T		T	G	T	T				A	G	A	G	C	T	T		G
HAP1b	IRIS 313-9978	IRAT 118::IRGC 55785-1::[IRIS 313-9978]		aro			SNPseek				C	A	T	G	C	G	A	G	C	A		C	G	G	T	C	C	C	G	T	C	T		T	G	T	T				A	G	A	G	C	T	T		G
HAP1b	IRIS 313-9995	NONGLIMNA 1::IRGC 58347-1::[IRIS 313-9995]	IRGC 125857	trop			SNPseek				C	A	T	G	C	G	A	G	C	A		C	G	G	T	C	C	C	G	T	C	T		T	G	T	T				A	G	A	G	C	T	T		G
HAP1b	IRIS 313-8277	K 2 C 14::IRGC 68549-1::[IRIS 313-8277]	IRGC 126067	trop			SNPseek				C	A	T	G	C	G	A	G	C	A		C	G	G	T	C	C	C	G	T	C	T		T	G	T	T				A	G	A	G	C	T	T		G
HAP1b	IRIS 313-8400	RIKUTO NORIN MOCHI 20::IRGC 410-1::[IRIS 313-8400]	IRGC 125622	trop			SNPseek				C	A	T	G	C	G	A	G	C	A		C	G	G	T	C	C	C	G	T	C	T		T	G	T	T				A	G	A	G	C	T	T		G
HAP1b	IRIS 313-8894	LEKATAN::IRGC 71554-1::[IRIS 313-8894]	IRGC 126070	trop			SNPseek				C	A	T	G	C	G	A	G	C	A		C	G	G	T	C	C	C	G	T	C	T		T	G	T	T				A	G	A	G	C	T	T		G
HAP1b	IRIS 313-9375	PULUTAN::IRGC 71596-1::[IRIS 313-9375]	IRGC 125877	trop			SNPseek				C	A	T	G	C	G	A	G	C	A		C	G	G	T	C	C	C	G	T	C	T		T	G	T	T				A	G	A	G	C	T	T		G
HAP1b	IRIS 313-9745	VARY MALADY::IRGC 69911-1::[IRIS 313-9745]	IRGC 127069	trop			SNPseek				C	A	T	G	C	G	A	G	C	A		C	G	G	T	C	C	C	G	T	C	T		T	G	T	T				A	G	A	G	C	T	T		G
HAP1b	IRIS 313-9789	RIKUTO TAUKI MOCHI 27::IRGC 5726-1::[IRIS 313-9789]	IRGC 125885	trop			SNPseek				C	A	T	G	C	G	A	G	C	A		C	G	G	T	C	C	C	G	T	C	T		T	G	T	T				A	G	A	G	C	T	T		G
HAP1b	IRIS 313-9800	KAHEI::IRGC 7691-1::[IRIS 313-9800]	IRGC 126981	trop			SNPseek				C	A	T	G	C	G	A	G	C	A		C	G	G	T	C	C	C	G	T	C	T		T	G	T	T				A	G	A	G	C	T	T		G
HAP1b	IRIS 313-10065	JAERAERYUKDO::IRGC 73053-1::[IRIS 313-10065]	IRGC 127055	trop			SNPseek				C	A	T	G	C	G	A	G	C	A		C	G	G	T	C	C	C	G	T	C	T		T	G	T	T				A	G	A	G	C	T	T		G
HAP1b	IRIS 313-10067	JEONBUKGUNGWEONNA::IRGC 73055-1::[IRIS 313-10067]	IRGC 125783	trop			SNPseek				C	A	T	G		G	A	G	C	A		C	G	G	T	C	C	C	G	T	C	T		T	G	T	T				A	G	A	G	C	T	T		G
HAP1b	IRIS 313-10071	CHIYODA WASE::IRGC 74467-1::[IRIS 313-10071]	IRGC 125705	trop			SNPseek				C	A	T	G	C	G	A	G	C	A		C	G	G	T	C	C	C	G	T	C	T		T	G	T	T				A	G	A	G	C	T	T		G
HAP1b	IRIS 313-10073	OWARI MOCHI::IRGC 74513-1::[IRIS 313-10073]	IRGC 125864	trop			SNPseek				C	A	T	G	C	G	A	G	C	A		C	G	G	T	C	C	C	G	T	C	T		T	G	T	T				A	G	A	G	C	T	T		G
HAP1b	IRIS 313-10074	RIKU AIKOKU::IRGC 74514-1::[IRIS 313-10074]	IRGC 125884	trop			SNPseek				C	A	T	G	C	G	A	G	C	A		C	G	G	T	C	C	C	G	T	C	T		T	G	T	T				A	G	A	G	C	T	T		G
HAP1b	IRIS 313-10075	SANGOKU::IRGC 74518-1::[IRIS 313-10075]	IRGC 125895	trop			SNPseek				C	A	T	G	C	G	A	G	C	A		C	G	G	T	C	C	C	G	T	C	T		T	G	T	T				A	G	A	G	C	T	T		G
HAP1b	IRIS 313-10076	SHINA MOCHI::IRGC 74523-1::[IRIS 313-10076]	IRGC 125900	trop			SNPseek				C	A	T	G	C	G	A	G	C	A		C	G	G	T	C	C	C	G	T	C	T		T	G	T	T				A	G	A	G	C	T	T		G
HAP1b	IRIS 313-10078	YOSHINO MOCHI::IRGC 74550-1::[IRIS 313-10078]	IRGC 125947	trop			SNPseek				C	A	T	G	C	G	A	G	C	A		C	G	G	T	C	C	C	G	T	C	T		T	G	T	T				A	G	A	G	C	T	T		G
HAP1b	IRIS 313-10079	DANGO MOCHI::IRGC 74551-1::[IRIS 313-10079]	IRGC 125722	trop			SNPseek				C	A	T	G	C	G	A	G	C	A		C	G	G	T	C	C	C	G	T	C	T		T	G	T	T				A	G	A	G	C	T	T		G
HAP1b	IRIS 313-10080	HIRAKAWA OKUTE::IRGC 74554-1::[IRIS 313-10080]	IRGC 125762	trop			SNPseek				C	A	T	G	C	G	A	G	C	A		C	G	G	T	C	C	C	G	T	C	T		T	G	T	T				A	G	A	G	C	T	T		G
HAP1b	IRIS 313-10094	GAWICHAL::IRGC 77653-1::[IRIS 313-10094]	IRGC 125750	trop			SNPseek				C	A	T	G	C	G	A	G	C	A		C	G	G	T	C	C	C	G	T	C	T		T	G	T	T				A	G	A	G	C	T
HAP1b	IRIS 313-8279	SAWAH::IRGC 71612-1::[IRIS 313-8279]	IRGC 126086	trop			SNPseek				C	A	T	G	C	G	A	G	C	A		C	G	G	T	C	C	C	G	T	C	T		T	G	T	T				A	G	A	G	C	T	T		G
HAP1b	IRIS 313-8381	PURAK SIRIBA::IRGC 71598-1::[IRIS 313-8381]	IRGC 126308	trop			SNPseek				C	A	T	G	C	G	A	G	C	A		C	G	G	T	C	C	C	G	T	C	T		T	G	T	T				A	G	A	G	C	T	T		G
HAP1b	IRIS 313-8865	PADI SEPAH::IRGC 48803-1::[IRIS 313-8865]	IRGC 126345	trop			SNPseek				C	A	T	G	C	G	A	G	C	A		C	G	G	T	C	C	C	G	T	C	T		T	G	T	T				A	G	A	G	C	T	T		G
HAP1b	IRIS 313-9050	ANGKARONG::IRGC 71493-1::[IRIS 313-9050]	IRGC 127070	trop			SNPseek				C	A	T	G	C	G	A	G	C	A		C	G	G	T		C	C	G	T	C	T		T	G	T	T				A	G	A	G	C	T	T		G
HAP1b	IRIS 313-9568	PAMPANGON (H)::IRGC 60392-1::[IRIS 313-9568]	IRGC 126346	trop			SNPseek				C	A	T	G	C	G	A	G	C	A		C	G	G	T	C	C	C	G	T	C	T		T	G	T	T				A	G	A	G	C	T	T		G
HAP1b	IRIS 313-10099	MANONGAZATO::IRGC 77876-1::[IRIS 313-10099]	IRGC 126303	trop			SNPseek				C	A	T	G	C	G	A	G	C	A		C	G	G	T	C	C	C	G	T	C	T		T	G	T	T				A	G	A	G	C	T	T		G
HAP1b	IRIS 313-9742	LOHAMBITRO::IRGC 69857-1::[IRIS 313-9742]	IRGC 127080	trop			SNPseek				C	A	T	G	C	G	A	G	C	A		C	G	G	T	C	C	C	G	T	C	T		T	G	T	T				A	G	A	G	C	T	T		G
HAP1b	IRIS 313-8121	MESTRE::GERVEX 1082-C1::[IRIS 313-8121]	IRGC 122169	japx			SNPseek				C	A	T	G	C	G	A	G	C	A		C	G	G	T	C	C	C	G	T	C	T		T	G	T	T				A	G	A	G	C	T	T		G
HAP1b	IRIS 313-8003	IR 47686-09-01-B-1::C1::[IRIS 313-8003]	IRGC 122095	trop			SNPseek				C	A	T	G	C	G	A	G	C	A		C	G	G	T	C	C	C	G	T	C	T		T	G	T	T				A	G	A	G	C		T		G
HAP1b	IRIS 313-7959	MITSANGANAHIJERY::GERVEX 8316-C1::[IRIS 313-7959]	IRGC 122172	trop			SNPseek				C	A	T	G	C	G	A	G	C	A		C	G	G	T	C	C	C	G	T	C	T		T	G	T	T				A	G	A	G	C	T	T		G
HAP1b	IRIS 313-7992	VARY LAVA 90::GERVEX 8254-C1::[IRIS 313-7992]	IRGC 122275	trop			SNPseek				C	A	T	G	C	G	A	G	C	A		C	G	G	T	C	C	C	G	T	C	T		T	G	T	T				A	G	A	G	C	T	T		G
HAP1b	IRIS 313-7868	CT 13582-15-5-M::C1::[IRIS 313-7868]	IRGC 122021	trop			SNPseek				C	A	T	G	C	G	A	G	C	A		C	G	G	T	C	C	C	G	T	C	T		T	G	T	T				A	G	A	G	C	T	T		G
HAP1b	IRIS 313-11435	MONMINEUPLEU::IRGC 50873-1::[IRIS 313-11435]	IRGC 128392	trop			SNPseek				C			G	C	G	A	G	C	A		C	G	G	T	C	C	C	G	T	C	T		T	G	T	T				A	G	A	G	C	T	T		G
HAP1b	IRIS 313-11441	NALA::IRGC 51247-1::[IRIS 313-11441]	IRGC 128399	trop			SNPseek				C	A	T	G	C	G	A	G	C	A		C	G	G	T	C	C	C	G	T	C	T		T	G	T	T				A	G	A	G	C	T	T		G
HAP1b	IRIS 313-11451	KALISAL::IRGC 52324-1::[IRIS 313-11451]	IRGC 128330	aro			SNPseek				C	A	T	G	C	G	A	G	C	A		C	G	G	T	C	C	C	G	T	C	T		T	G	T	T				A	G	A	G	C	T	T		G
HAP1b	IRIS 313-11464	CARAWI::IRGC 52887-1::[IRIS 313-11464]	IRGC 128254	trop			SNPseek				C	A	T	G	C	G	A	G	C	A		C	G	G	T	C	C	C	G	T	C	T		T	G	T	T				A	G	A	G	C	T	T		G
HAP1b	IRIS 313-11522	XINTUAN HEI GU::IRGC 56159-1::[IRIS 313-11522]	IRGC 128505	japx			SNPseek				C	A	T	G	C	G	A	G	C	A		C	G	G	T	C	C	C	G	T	C	T		T	G	T	T				A	G	A	G	C	T	T		G
HAP1b	IRIS 313-11524	KOUINONEPOU::IRGC 56663-1::[IRIS 313-11524]	IRGC 132405	trop			SNPseek				C	A	T	G	C	G	A	G	C	A		C	G	G	T	C	C	C	G	T	C	T		T	G	T	T				A	G	A	G	C	T	T		G
HAP1b	IRIS 313-11526	FOSSA (GBE)::IRGC 56767-1::[IRIS 313-11526]	IRGC 128292	trop			SNPseek				C	A	T	G	C	G	A	G	C	A		C	G	G	T	C	C	C	G	T	C	T		T	G	T	T				A	G	A	G	C	T	T		G
HAP1b	IRIS 313-11537	J 6 IR 438 (WC 694)::IRGC 57599-1::[IRIS 313-11537]	IRGC 127446	trop			SNPseek				C	A	T	G	C	G	A	G	C	A		C	G	G	T	C	C	C	G	T	C	T		T	G	T	T				A	G	A	G	C	T	T		G
HAP1b	IRIS 313-11564	HALIDA::IRGC 59005-1::[IRIS 313-11564]	IRGC 127400	aro			SNPseek				C	A	T	G	C	G	A	G	C	A		C	G	G	T	C	C	C	G	T	C	T		T	G	T	T				A	G	A	G	C	T	T		G
HAP1b	IRIS 313-11567	RATO BASMATI::IRGC 59205-1::[IRIS 313-11567]	IRGC 127766	aro			SNPseek				C			G	C	G	A	G	C	A		C	G	G	T	C	C	C	G	T	C	T		T	G	T	T				A	G	A	G	C	T	T		G
HAP1b	IRIS 313-11625	CHOBO::IRGC 61930-1::[IRIS 313-11625]	IRGC 127281	aro			SNPseek				C	A	T	G	C	G	A	G	C	A		C	G	G	T	C	C	C	G	T	C	T		T	G	T	T				A	G	A	G	C	T	T		G
HAP1b	IRIS 313-11626	GUDURA::IRGC 61955-1::[IRIS 313-11626]	IRGC 127395	aro			SNPseek				C	A	T	G	C	G	A	G	C	A		C	G	G	T	C	C	C	G	T	C	T		T	G	T	T				A	G	A	G	C	T	T		G
HAP1b	IRIS 313-11630	POHHERLIMASION::IRGC 62025-1::[IRIS 313-11630]	IRGC 127737	aro			SNPseek				C	A	T	G	C	G	A	G	C			C	G		T	C	C	C	G	T	C	T		T	G	T	T				A	G	A	G	C	T	T		G
HAP1b	IRIS 313-11632	SETO JHINUWA::IRGC 62043-1::[IRIS 313-11632]	IRGC 128466	aro			SNPseek				C		T	G	C	G	A	G	C	A		C	G	G		C	C	C	G	T	C	T		T		T	T				A	G	A	G	C	T	T		G
HAP1b	IRIS 313-11611	YAH YAW::IRGC 61359-1::[IRIS 313-11611]	IRGC 127898	trop			SNPseek				C	A	T	G	C	G	A	G	C	A		C	G	G	T	C	C	C	G	T	C	T		T	G	T	T				A	G	A	G	C	T	T		G
HAP1b	IRIS 313-11743	CHHOTI MASHINO::IRGC 67830-1::[IRIS 313-11743]	IRGC 127272	aro			SNPseek				C	A	T	G	C	G	A	G	C	A		C	G	G	T	C	C	C	G	T	C	T		T	G	T	T				A	G	A	G	C	T	T		G
HAP1b	IRIS 313-11759	K 2 C 45::IRGC 68552-1::[IRIS 313-11759]	IRGC 131995	trop			SNPseek				C	A	T	G	C	G	A	G	C	A		C	G	G	T	C	C	C	G	T	C	T		T	G	T	T				A	G	A	G	C	T	T		G
HAP1b	IRIS 313-11765	P 335::IRGC 69001-1::[IRIS 313-11765]	IRGC 127696	aro			SNPseek				C	A	T	G				G		A		C	G		T	C		C	G	T	C	T		T	G	T					A	G	A	G	C	T	T		G
HAP1b	IRIS 313-11792	VONBOANGY::IRGC 69947-1::[IRIS 313-11792]	IRGC 128498	trop			SNPseek				C	A	T	G	C	G	A	G	C	A		C	G	G	T	C	C	C	G	T	C	T		T	G	T	T				A	G	A	G	C	T	T		G
HAP1b	IRIS 313-11825	HANSRAJ::IRGC 70836-1::[IRIS 313-11825]	IRGC 135753	aro			SNPseek				C	A	T	G	C	G	A	G	C	A		C	G	G	T	C	C	C	G	T	C	T		T	G	T					A	G	A	G	C	T	T		G
HAP1b	IRIS 313-11826	HIRA NAKHI::IRGC 70840-1::[IRIS 313-11826]	IRGC 128309	aro			SNPseek				C	A	T	G	C	G	A	G	C	A		C	G	G	T	C	C	C	G	T	C	T		T	G	T	T				A	G	A	G	C	T	T		G
HAP1b	IRIS 313-11913	BUAGKOG::IRGC 74318-1::[IRIS 313-11913]	IRGC 128245	trop			SNPseek				C	A	T	G	C	G	A	G	C	A		C	G	G	T	C	C	C	G	T	C	T		T	G	T	T				A	G	A	G	C	T	T		G
HAP1b	IRIS 313-11970	BUNTU DOMBA 1::IRGC 77554-1::[IRIS 313-11970]	IRGC 127240	trop			SNPseek				C	A	T	G	C	G	A	G	C	A		C	G	G	T	C	C	C	G	T	C	T		T	G	T	T				A	G	A	G	C	T	T		G
HAP1b	IRIS 313-11995	PINUTYUKAN::IRGC 78995-1::[IRIS 313-11995]	IRGC 136101	trop			SNPseek				C	A	T	G	C	G	A	G	C	A		C	G	G	T	C	C	C	G	T	C	T		T	G	T	T				A	G	A	G	C	T	T		G
HAP1b	IRIS 313-12059	LIGEN 2::IRGC 82398-1::[IRIS 313-12059]	IRGC 128364	temp			SNPseek				C	A	T	G	C	G	A	G	C	A		C	G	G	T	C	C	C	G	T	C	T		T	G	T	T				A	G	A	G	C	T	T		G
HAP1b	IRIS 313-12060	LIJIAN 942::IRGC 82399-1::[IRIS 313-12060]	IRGC 128365	japx			SNPseek				C	A	T	G	C	G	A	G	C	A		C	G	G	T	C	C	C	G	T	C	T		T	G	T	T				A	G	A	G	C	T	T		G
HAP1b	IRIS 313-12061	YUNLEN 13::IRGC 82402-1::[IRIS 313-12061]	IRGC 128509	temp			SNPseek				C	A	T	G	C	G	A	G	C	A		C	G	G	T	C	C	C	G	T	C	T		T	G	T	T				A	G	A	G	C	T	T		G
HAP1b	IRIS 313-12070	BABELIONG::IRGC 82688-1::[IRIS 313-12070]	IRGC 127198	trop			SNPseek				C	A	T	G	C	G	A	G	C	A		C	G	G	T	C	C	C	G	T	C	T		T	G	T	T				A	G	A	G	C	T	T		G
HAP1b	IRIS 313-12074	KYAIN WAR ME DONE::IRGC 82819-1::[IRIS 313-12074]	IRGC 132283	aro			SNPseek				C	A	T	G	C	G	A	G	C	A		C	G	G	T	C	C	C	G	T	C	T		T	G	T	T				A	G	A	G	C	T	T		G
HAP1b	IRIS 313-12094	KASHA::IRGC 83865-1::[IRIS 313-12094]	IRGC 127496	aro			SNPseek				C	A	T	G	C	G	A	G	C	A		C	G	G	T	C	C	C	G	T	C				G	T	T				A	G	A	G	C	T	T		G
HAP1b	IRIS 313-12108	PARAI JALEY MASIK::IRGC 84215-1::[IRIS 313-12108]		trop			SNPseek				C	A	T	G	C	G	A	G	C	A		C	G	G	T	C	C	C	G	T	C	T		T	G	T	T				A	G	A	G	C	T	T		G
HAP1b	IRIS 313-12244	PINAHULA::IRGC 93937-1::[IRIS 313-12244]	IRGC 128433	trop			SNPseek				C	A	T	G	C	G	A	G	C	A		C	G	G	T	C	C	C	G	T	C	T		T	G	T	T				A	G	A	G	C	T	T		G
HAP1b	IRIS 313-12281	SALAZANA::IRGC 97219-1::[IRIS 313-12281]	IRGC 128457	trop			SNPseek				C	A	T	G	C	G	A	G	C	A		C	G	G	T	C	C	C	G	T	C	T		T	G	T	T				A	G	A	G	C	T	T		G
HAP1b	IRIS 313-12285	PADI MIAT (KECIL)::IRGC 97366-1::[IRIS 313-12285]	IRGC 135576	trop			SNPseek				C	A	T	G	C	G	A	G	C	A		C	G	G	T	C	C	C	G	T	C	T		T	G	T	T				A	G	A	G	C	T	T		G
HAP1b	IRIS 313-10537	KALAMON 113::IRGC 6534-1::[IRIS 313-10537]		admix			SNPseek				C	A	T	G	C	G	A	G	C	A		C	G	G	T	C	C	C	G	T	C	T		T	G	T	T				A	G	A	G	C	T	T		G
HAP1b	IRIS 313-10521	SANNABATHA::IRGC 5971-1::[IRIS 313-10521]		aro			SNPseek				C	A	T	G	C	G	A	G	C	A		C	G	G	T	C	C	C	G	T	C	T		T	G	T	T				A	G	A	G	C	T	T		G
HAP1b	IRIS 313-10554	BONG SEN::IRGC 7011-1::[IRIS 313-10554]	IRGC 127235	ind3			SNPseek				C	A	T	G	C	G		G	C	A		C	G	G	T	C	C	C	G	T	C	T		T	G	T	T				A	G	A	G	C	T	T		G
HAP1b	IRIS 313-10578	PARAY QIKUG KABAYUH::IRGC 8059-1::[IRIS 313-10578]	IRGC 132028	trop			SNPseek				C	A	T	G	C	G	A	G	C	A		C	G	G	T	C	C	C	G	T	C	T		T	G	T	T				A	G	A	G	C	T	T		G
HAP1b	IRIS 313-10670	ARC 10296::IRGC 12421-2::[IRIS 313-10670]	IRGC 132317	aro			SNPseek				C	A	T	G	C	G	A	G	C	A		C	G	G	T	C	C	C	G	T	C	T		T	G	T	T				A	G	A	G	C	T	T		G
HAP1b	IRIS 313-10730	NANIBRE::IRGC 16102-2::[IRIS 313-10730]	IRGC 132258	trop			SNPseek				C	A	T	G	C	G	A	G	C	A		C	G	G	T	C	C	C	G	T	C	T		T	G	T	T				A	G	A	G	C	T	T		G
HAP1b	IRIS 313-10732	MADHUWA KARIA::IRGC 16138-2::[IRIS 313-10732]	IRGC 128102	aro			SNPseek				C	A	T	G	C	G	A	G	C	A		C	G	G	T	C	C	C	G	T	C	T		T	G	T	T				A	G	A	G	C	T	T		G
HAP1b	IRIS 313-10711	7 AC::IRGC 14860-2::[IRIS 313-10711]	IRGC 132314	trop			SNPseek				C	A	T	G	C	G	A	G	C	A		C	G	G	T	C	C	C	G	T	C	T		T	G	T	T				A	G	A	G	C	T	T		G
HAP1b	IRIS 313-10794	MENDUNGAN::IRGC 18245-1::[IRIS 313-10794]	IRGC 127624	trop			SNPseek				C	A	T	G	C	G	A	G	C	A		C	G	G	T	C	C	C	G	T	C	T		T	G	T	T				A	G	A	G	C	T	T		G
HAP1b	IRIS 313-10827	BINARITOS::IRGC 19391-1::[IRIS 313-10827]	IRGC 128242	trop			SNPseek				C	A	T	G	C	G	A	G	C	A		C	G	G	T	C	C	C	G	T	C	T		T	G	T	T				A	G	A	G	C	T	T		G
HAP1b	IRIS 313-10830	INAPORAONAN::IRGC 19418-1::[IRIS 313-10830]	IRGC 127429	trop			SNPseek				C	A	T	G	C	G	A	G	C	A		C	G	G	T	C	C	C	G	T	C	T		T	G	T	T				A	G	A	G	C	T	T		G
HAP1b	IRIS 313-10832	MALASAY::IRGC 19456-1::[IRIS 313-10832]	IRGC 128377	trop			SNPseek				C	A	T	G	C	G	A	G	C	A		C	G	G	T	C	C	C	G	T	C	T		T	G	T	T				A	G	A	G	C	T	T		G
HAP1b	IRIS 313-10864	ARC 11338::IRGC 21329-1::[IRIS 313-10864]	IRGC 127136	admix			SNPseek				C	A	T	G	C	G	A	G	C	A		C	G	G	T	C	C	C	G	T	C	T		T	G	T	T				A	G	A	G	C	T	T		G
HAP1b	IRIS 313-10868	ARC 11571::IRGC 21487-2::[IRIS 313-10868]	IRGC 127939	aro			SNPseek				C	A	T	G	C	G	A	G	C	A		C	G	G	T	C	C	C	G	T	C	T		T	G	T	T				A	G	A	G	C	T	T		G
HAP1b	IRIS 313-10933	ARC 7281::IRGC 24252-2::[IRIS 313-10933]	IRGC 132245	aro			SNPseek				C	A	T	G	C	G	A	G	C	A		C	G	G	T	C	C	C	G	T	C	T		T	G	T	T				A	G	A	G	C	T	T		G
HAP1b	IRIS 313-10949	TEKALAK::IRGC 25154-1::[IRIS 313-10949]	IRGC 127851	trop			SNPseek				C	A	T	G	C	G	A	G	C	A		C	G	G	T	C	C	C	G	T		T		T	G	T	T				A	G	A	G	C	T	T		G
HAP1b	IRIS 313-10952	KILANG MEDU::IRGC 25442-1::[IRIS 313-10952]	IRGC 132003	trop			SNPseek				C	A	T	G	C	G	A	G	C	A		C	G	G	T	C	C	C	G	T	C	T		T	G		T				A	G	A	G	C	T	T		G
HAP1b	IRIS 313-10953	PADI ABUNG KUNING::IRGC 25469-1::[IRIS 313-10953]	IRGC 128417	trop			SNPseek				C	A	T	G	C	G	A	G	C	A		C	G	G	T	C	C	C	G	T	C	T		T	G	T	T				A	G	A	G	C	T	T		G
HAP1b	IRIS 313-11022	BASMATI SUFAID 100::IRGC 27791-1::[IRIS 313-11022]	IRGC 135737	aro			SNPseek				C	A	T	G	C	G	A	G	C	A		C	G	G	T	C	C	C	G	T	C	T		T	G	T	T				A	G	A	G	C	T	T		G
HAP1b	IRIS 313-11026	HANSRAJ::IRGC 27936-2::[IRIS 313-11026]	IRGC 132336	aro			SNPseek				C	A	T	G	C	G	A	G	C	A		C	G	G	T	C	C	C	G	T	C	T		T	G	T	T				A	G	A	G	C	T	T		G
HAP1b	IRIS 313-11032	PALAM PURI BAS 137::IRGC 28084-1::[IRIS 313-11032]	IRGC 127710	aro			SNPseek				C	A	T	G	C	G	A	G	C	A		C	G	G	T	C	C	C	G	T	C	T		T	G	T	T				A	G	A	G	C	T	T		G
HAP1b	IRIS 313-10992	PILIT TAPUL::IRGC 26887-1::[IRIS 313-10992]	IRGC 127730	trop			SNPseek				C	A	T	G	C	G	A	G	C	A		C	G	G	T	C	C	C	G	T	C	T		T	G	T	T				A	G	A	G	C	T	T		G
HAP1b	IRIS 313-11066	GASMAL 339::IRGC 29333-1::[IRIS 313-11066]	IRGC 127381	admix			SNPseek				C	A	T	G	C	G	A	G	C	A		C	G	G	T	C	C	C	G	T	C	T		T	G	T	T				A	G	A	G	C	T	T		G
HAP1b	IRIS 313-11105	D 3-130::IRGC 30986-2::[IRIS 313-11105]	IRGC 132247	trop			SNPseek				C	A	T	G	C	G	A	G	C	A		C	G	G			C	C	G	T	C	T		T	G	T	T				A	G	A	G	C	T	T		G
HAP1b	IRIS 313-11125	DHALA AMAN 973::IRGC 32861-1::[IRIS 313-11125]		admix			SNPseek				C	A	T	G	C	G	A	G	C	A		C	G	G	T	C	C	C	G	T	C	T		T	G	T	T				A	G	A	G	C	T	T		G
HAP1b	IRIS 313-11217	LAL AMAN 207::IRGC 37754-1::[IRIS 313-11217]		aro			SNPseek				C	A	T		C	G	A	G	C	A		C	G	G	T	C	C	C	G	T	C	T		T	G	T	T				A	G	A	G	C	T	T		G
HAP1b	IRIS 313-11218	BADSHABHOG 4-60::IRGC 37793-2::[IRIS 313-11218]	IRGC 127982	aro			SNPseek				C	A	T	G	C	G	A	G	C	A		C	G	G	T	C	C	C	G	T	C	T		T	G	T	T				A	G	A	G	C	T	T		G
HAP1b	IRIS 313-11238	IAC 1132::IRGC 39052-1::[IRIS 313-11238]		trop			SNPseek				C	A	T	G	C	G	A	G	C	A		C	G	G	T	C	C	C	G	T	C	T		T	G	T	T				A	G	A	G	C	T	T		G
HAP1b	IRIS 313-11258	ARC 13502::IRGC 41126-2::[IRIS 313-11258]	IRGC 127948	aro			SNPseek				C	A	T	G	C	G	A	G	C	A		C	G	G	T	C	C	C	G	T	C	T		T	G	T	T				A	G	A	G	C	T	T		G
HAP1b	IRIS 313-11289	ARC 18578::IRGC 42459-2::[IRIS 313-11289]	IRGC 127971	aro			SNPseek				C	A	T	G	C	G	A	G	C	A		C	G	G	T	C	C	C	G	T	C	T		T	G	T	T				A	G	A	G	C	T	T		G
HAP1b	IRIS 313-11293	ARC 10975::IRGC 42611-2::[IRIS 313-11293]	IRGC 127934	aro			SNPseek				C	A	T	G	C	G	A	G	C	A		C	G	G	T	C	C	C	G	T	C	T		T	G	T	T				A	G	A	G	C	T	T		G
HAP1b	IRIS 313-11268	ARC 14398::IRGC 41544-2::[IRIS 313-11268]	IRGC 127957	aro			SNPseek				C	A	T	G	C	G	A	G	C	A		C	G	G	T	C	C	C	G	T	C	T		T	G	T	T				A	G	A	G	C	T	T		G
HAP1b	IRIS 313-11328	PADI BURIH::IRGC 44081-1::[IRIS 313-11328]	IRGC 127699	trop			SNPseek				C	A	T	G	C	G	A	G	C	A		C	G	G	T	C	C	C	G	T	C	T		T	G	T	T				A	G	A	G	C	T	T		G
HAP1b	IRIS 313-11350	BAJAL::IRGC 45024-2::[IRIS 313-11350]	IRGC 127983	aro			SNPseek				C	A	T	G	C	G	A	G	C	A		C	G	G	T	C	C	C	G	T	C	T		T	G	T	T				A	G	A	G	C	T	T		G
HAP1b	IRIS 313-11356	CR 44-1::IRGC 45397-1::[IRIS 313-11356]		aro			SNPseek				C	A	T	G	C	G	A	G	C	A		C	G	G	T	C	C	C	G	T	C	T		T	G	T	T				A	G	A	G	C	T	T		G
HAP1b	IRIS 313-11360	JALADHI 1::IRGC 45858-2::[IRIS 313-11360]	IRGC 132342	aro			SNPseek				C	A	T	G	C	G	A	G	C	A		C	G	G	T	C	C	C	G	T	C	T		T	G	T	T				A	G	A	G	C	T	T		G
HAP1b	IRIS 313-11362	KEYA NUNIA::IRGC 46117-2::[IRIS 313-11362]	IRGC 128080	aro			SNPseek				C	A	T	G	C	G	A	G	C	A		C	G	G	T	C	C	C	G	T	C	T		T	G	T	T				A	G	A	G	C	T	T		G
HAP1b	IRIS 313-11364	KHIRPULI::IRGC 46143-1::[IRIS 313-11364]	IRGC 135761	indx			SNPseek				C	A	T	G	C	G	A	G	C	A		C	G	G	T	C	C	C	G	T	C	T		T	G	T	T				A	G	A	G	C	T	T		G
HAP1b	IRIS 313-11373	T 3::IRGC 46760-2::[IRIS 313-11373]	IRGC 128177	aro			SNPseek				C	A	T	G		G	A	G	C	A		C	G	G	T	C	C	C	G	T	C	T		T	G	T	T				A	G	A	G	C	T	T		G
HAP1b	IRIS 313-11379	CADIDIT (GLUT)::IRGC 47161-1::[IRIS 313-11379]	IRGC 127245	trop			SNPseek				C	A	T	G	C	G	A	G	C	A		C	G	G	T	C	C	C	G	T	C	T		T	G	T	T				A	G	A	G	C	T	T		G
HAP1b	IRIS 313-11396	MAS::IRGC 48758-1::[IRIS 313-11396]	IRGC 128385	trop			SNPseek				C	A			C	G	A	G	C	A		C	G	G	T	C	C	C	G	T	C	T		T	G	T	T					G	A	G	C	T	T		G
HAP1b	IRIS 313-11397	TAMBU::IRGC 48932-1::[IRIS 313-11397]	IRGC 132044	trop			SNPseek				C	A	T	G	C	G	A	G	C	A		C	G	G	T	C	C	C	G	T	C	T		T	G	T	T				A	G	A	G	C	T	T		G
HAP1b	IRIS 313-11401	MOTANGA::IRGC 49242-2::[IRIS 313-11401]	IRGC 128113	aro			SNPseek				C	A	T	G	C	G	A	G	C	A		C	G	G	T	C	C	C	G	T	C	T		T	G	T	T				A	G	A	G	C	T	T		G
HAP1b	IRIS 313-11427	GEM OU BRAZIL::IRGC 50470-1::[IRIS 313-11427]	IRGC 128295	trop			SNPseek				C	A	T	G	C	G	A	G	C	A		C	G	G	T	C	C	C	G	T	C	T		T	G	T	T				A	G	A	G	C	T	T		G
HAP1b	B196	TAIDONGLUDAO::[B196]		trop			SNPseek				C	A	T	G	C	G	A	G	C	A		C	G	G	T	C	C	C	G	T	C	T		T	G	T	T				A	G	A	G	C	T	T		G
HAP1b	CX110	UP15::[CX110]	IRGC 136062	aro			SNPseek				C	A	T	G	C	G	A	G	C	A		C	G	G	T	C	C	C	G	T	C	T		T	G	T	T				A	G	A	G	C	T	T		G
HAP1b	CX112	GINGA::[CX112]	IRGC 135893	admix			SNPseek				C	A	T	G	C	G	A	G	C	A		C	G	G	T	C	C	C	G	T	C			T	G	T	T				A	G	A	G	C	T	T		G
HAP1b	CX143	KHASAR::[CX143]	IRGC 135968	aro			SNPseek				C	A	T	G	C	G	A	G	C	A		C	G	G	T	C	C	C	G	T	C	T		T	G	T	T				A	G	A	G	C	T	T		G
HAP1b	CX149	KARNAL LOCAL::[CX149]		aro			SNPseek				C	A	T	G	C	G	A	G	C	A		C	G	G	T	C	C	C	G	T	C	T		T	G	T	T				A	G	A	G	C	T	T		G
HAP1b	CX241	IAC47::[CX241]	IRGC 135913	trop			SNPseek				C	A	T	G	C	G	A	G	C	A		C	G	G	T	C	C	C	G	T	C	T		T	G	T	T					G	A	G	C	T	T		G
HAP1b	CX285	NONGLINNUO::[CX285]	IRGC 136010	trop			SNPseek				C	A	T	G	C	G	A	G	C	A		C	G	G	T	C	C	C	G	T	C	T		T	G	T	T				A	G	A	G	C	T	T		G
HAP1b	CX59	MILAGROSA, ZAWA BANDAY::[CX59]	IRGC 135983	aro			SNPseek				C	A	T	G	C	G	A	G	C	A		C	G	G	T	C	C	C	G	T	C	T		T	G	T	T				A	G	A	G	C	T	T		G
HAP1b	CX65	DOMSIAH::[CX65]	IRGC 117467	aro			SNPseek				C	A	T	G	C	G	A	G		A		C	G	G	T	C	C	C	G	T	C	T		T	G	T	T				A	G	A	G	C	T	T		G
HAP1b	CX66	TAROM MOLAII::[CX66]	IRGC 136052	aro			SNPseek				C	A	T	G	C	G	A	G	C	A		C	G	G	T	C	C	C	G	T	C	T		T	G	T	T				A	G	A	G	C	T	T		G
HAP1b	CX67	BINAM::[CX67]	IRGC 135845	aro			SNPseek				C	A	T	G	C	G	A	G	C	A		C	G	G	T	C	C	C	G	T	C	T		T	G	T	T				A	G	A	G	C	T	T		G
HAP1b	CX72	BASMATI 385::[CX72]	IRGC 135838	aro		sd1	SNPseek				C	A	T	G	C	G	A	G	C	A		C	G	G	T	C	C	C	G	T	C	T		T	G	T	T				A	G	A	G	C	T	T		G
HAP2
HAP2	IRIS 313-11222	DUDHSWAR 15-157::IRGC 37967-2::[IRIS 313-11222]	IRGC 132308	ind2	Not assigned		De novo assembled	G	C	C	C	G	C	A	A	G	G	G	T	G	T	C	A	A	G	C	T	C	A	G	C	G	C	C	A	T	C				G	G	G	A	T	C	C		A
HAP2	IRIS 313-12011	YU TOU ZHONG::IRGC 79749-1::[IRIS 313-12011]	IRGC 128510	indx	I		De novo assembled	G	C	C	C	G	C	A	A	G	G	G	T	G	T	C	A	A	G	C	T	C	A	G	C	G	C	C	A	T	C				G	G	G	A	T	C	C		A
HAP2	IRIS 313-8184	FRAGANCE::GERVEX 1651-C1::[IRIS 313-8184]	IRGC 122050	admix	I	sd1	De novo assembled	G	C	C	C	G	C	A	A	G	G	G	T	G	T	C	A	A	G	C	T	C	A	G	C	G	C	C	A	T	C				G	G	G	A	T	C	C		A
HAP2	IRIS 313-11656	B 3913 B 16-20 ST 28::IRGC 63099-1::[IRIS 313-11656]	IRGC 127196	indx	I		De novo assembled	G	C	C	C	G	C	A	A	G	G	G	T	G	T	C	A	A	G	C	T	C	A	G	C	G	C	C	A	T	C				G	G	G	A	T	C	C		A
HAP2	IRIS 313-9067	BHOJON KOLPO::IRGC 31727-1::[IRIS 313-9067]	IRGC 125681	ind2	I		De novo assembled	G	C	C	C	G	C	A	A	G	G	G	T	G	T	C	A	A	G	C	T	C	A	G	C	G	C	C	A	T	C				G	G	G	A	T	C	C		A
HAP2	IRIS 313-11085	KHAO HAE::IRGC 29773-3::[IRIS 313-11085]	IRGC 132273	indx	I		De novo assembled	G	C	C	C	G	C	A	A	G	G	G	T	G	T	C	A	A	G	C	T	C	A	G	C	G	C	C	A	T	C				G	G	G	A	T	C	C		A
HAP2	IRIS 313-9696	NAZIRA SAIL::IRGC 77284-1::[IRIS 313-9696]	IRGC 125850	indx	I		De novo assembled	G	C	C	C	G	C	A	A	G	G	G	T	G	T	C	A	A	G	C	T	C	A	G	C	G	C	C	A	T	C				G	G	G	A	T	C	C		A
HAP2	IRIS 313-11801	FAN WU::IRGC 70245-1::[IRIS 313-11801]	IRGC 127368	indx	I		De novo assembled	G	C	C	C	G	C	A	A	G	G	G	T	G	T	C	A	A	G	C	T	C	A	G	C	G	C	C	A	T	C				G	G	G	A	T	C	C		A
HAP2	B265	WUKEZHAN::[B265]		indx	I		De novo assembled	G	C	C	C	G	C	A	A	G	G	G	T	G	T	C	A	A	G	C	T	C	A	G	C	G	C	C	A	T	C				G	G	G	A	T	C	C		A
HAP2	IRIS 313-11930	ITA 117::IRGC 75235-1::[IRIS 313-11930]	IRGC 127444	ind1B	I		De novo assembled	G	C	C	C	G	C	A	A	G	G	G	T	G	T	C	A	A	G	C	T	C	A	G	C	G	C	C	A	T	C				G	G	G	A	T	C	C		A
HAP2	IRIS 313-10271	IA CUBA 17::IRGC 116990-1::[IRIS 313-10271]	IRGC 125966	indx	I	sd1	De novo assembled	G	C	C	C	G	C	A	A	G	G	G	T	G	T	C	A	A	G	C	T	C	A	G	C	G	C	C	A	T	C				G	G	G	A	T	C	C		A
HAP2	B129	HONGAINUO::[B129]		indx	I		De novo assembled	G	C	C	C	G	C	A	A	G	G	G	T	G	T	C	A	A	G	C	T	C	A	G	C	G	C	C	A	T	C				G	G	G	A	T	C	C		A
HAP2	B044	SANTIANNUO::[B044]	IRGC 136042	indx	I		De novo assembled	G	C	C	C	G	C	A	A	G	G	G	T	G	T	C	A	A	G	C	T	C	A	G	C	G	C	C	A	T	C				G	G	G	A	T	C	C		A
HAP2	B035	AMERICAN RICE::[B035]	IRGC 135828	indx	I	sd1	De novo assembled	G	C	C	C	G	C	A	A	G	G	G	T	G	T	C	A	A	G	C	T	C	A	G	C	G	C	C	A	T	C				G	G	G	A	T	C	C		A
HAP2	IRIS 313-8392	IR 2003-P7-7-4-2::IRGC 32671-1::[IRIS 313-8392]	IRGC 125970	ind1B	I	sd1	De novo assembled	G	C	C	C	G	C	A	A	G	G	G	T	G	T	C	A	A	G	C	T	C	A	G	C	G	C	C	A	T	C				G	G	G	A	T	C	C		A
HAP2	IRIS 313-11515	BKN BR 1031-78-5-4::IRGC 55927-1::[IRIS 313-11515]	IRGC 127231	indx	I		De novo assembled	G	C	C	C	G	C	A	A	G	G	G	T	G	T	C	A	A	G	C	T	C	A	G	C	G	C	C	A	T	C				G	G	G	A	T	C	C		A
HAP2	IRIS 313-11853	BU ZHI MING::IRGC 71971-1::[IRIS 313-11853]	IRGC 127242	ind1A	I		De novo assembled	G	C	C	C	G	C	A	A	G	G	G	T	G	T	C	A	A	G	C	T	C	A	G	C	G	C	C	A	T	C				G	G	G	A	T	C	C		A
HAP2	IRIS 313-10753	ZACATEPEC::IRGC 16901-2::[IRIS 313-10753]	IRGC 128205	ind1B	I	sd1	De novo assembled	G	C	C	C	G	C	A	A	G	G	G	T	G	T	C	A	A	G	C	T	C	A	G	C	G	C	C	A	T	C				G	G	G	A	T	C	C		A
HAP2	IRIS 313-15906	IR 73571-3B-11-3-K2::G1::[IRIS 313-15906]	IRGC 126963	indx	I	sd1	De novo assembled	G	C	C	C	G	C	A	A	G	G	G	T	G	T	C	A	A	G	C	T	C	A	G	C	G	C	C	A	T	C				G	G	G	A	T	C	C		A
HAP2	B075	JINBAOYIN::[B075]		indx	I		De novo assembled	G	C	C	C	G	C	A	A	G	G	G	T	G	T	C	A	A	G	C	T	C	A	G	C	G	C	C	A	T	C				G	G	G	A	T	C	C		A
HAP2	B090	ZIMI::[B090]		indx	Not assigned		De novo assembled	G	C	C	C	G	C	A	A	G	G	G	T	G	T	C	A	A	G	C	T	C	A	G	C	G	C	C	A	T	C				G	G	G	A	T	C	C		A
HAP2	IRIS 313-12207	SALA::IRGC 90457-1::[IRIS 313-12207]	IRGC 128456	indx	Not assigned		De novo assembled	G	C	C	C	G	C	A	A	G	G	G	T	G	T	C	A	A	G	C	T	C	A	G	C	G	C	C	A	T	C				G	G	G	A	T	C	C		A
HAP2	IRIS 313-8850	ASHMBER::IRGC 27522-1::[IRIS 313-8850]	IRGC 125657	ind2	Not assigned		De novo assembled	G	C	C	C	G	C	A	A	G	G	G	T	G	T	C	A	A	G	C	T	C	A	G	C	G	C	C	A	T	C				G	G	G	A	T	C	C		A
HAP2	IRIS 313-11204	KARTIKHAMA::IRGC 37149-2::[IRIS 313-11204]	IRGC 128072	indx	Not assigned		De novo assembled	G	C	C	C	G	C	A	A	G	G	G	T	G	T	C	A	A	G	C	T	C	A	G	C	G	C	C	A	T	C				G	G	G	A	T	C	C		A
HAP2	CX388	KR200::[CX388]	IRGC 135972	ind1B	Not assigned	sd1	De novo assembled	G	C	C	C	G	C	A	A	G	G	G	T	G	T	C	A	A	G	C	T	C	A	G	C	G	C	C	A	T	C				G	G	G	A	T	C	C		A
HAP2	CX182	SLG1::[CX182]	IRGC 136047	indx	I	sd1	De novo assembled	G	C	C	C	G	C	A	A	G	G	G	T	G	T	C	A	A	G	C	T	C	A	G	C	G	C	C	A	T	C				G	G	G	A	T	C	C		A
HAP2	IRIS 313-10503	HA GOO::IRGC 4577-1::[IRIS 313-10503]	IRGC 127398	ind1A	I		De novo assembled	G	C	C	C	G	C	A	A	G	G	G	T	G	T	C	A	A	G	C	T	C	A	G	C	G	C	C	A	T	C				G	G	G	A	T	C	C		A
HAP2	CX250	829::[CX250]	IRGC 135820	ind1B	I	sd1	De novo assembled	G	C	C	C	G	C	A	A	G	G	G	T	G	T	C	A	A	G	C	T	C	A	G	C	G	C	C	A	T	C				G	G	G	A	T	C	C		A
HAP2	B229	MENJIADING 2::[B229]		indx	Not assigned		De novo assembled	G	C	C	C	G	C	A	A	G	G	G	T	G	T	C	A	A	G	C	T	C	A	G	C	G	C	C	A	T	C				G	G	G	A	T	C	C		A
HAP2	IRIS 313-10402	IRGA 411-1-6-1F-A::IRGC 117344-1::[IRIS 313-10402]	IRGC 125990	ind1B	H		De novo assembled	G	C	C	C	G	C	A	A	G	G	G	T	G	T	C	A	A	G	C	T	C	A	G	C	G	C	C	A	T	C				G	G	G	A	T	C	C		A
HAP2	CX238	BW311-9::[CX238]	IRGC 135854	ind1B	D_2		De novo assembled	G	C	C	C	G	C	A	A	G	G	G	T	G	T	C	A	A	G	C	T	C	A	G	C	G	C	C	A	T	C				G	G	G	A	T	C	C		A
HAP2	IRIS 313-8987	SERIBU::IRGC 71615-1::[IRIS 313-8987]		indx	A_7	sd1	De novo assembled	G	C	C	C	G	C	A	A	G	G	G	T	G	T	C	A	A	G	C	T	C	A	G	C	G	C	C	A	T	C				G	G	G	A	T	C	C		A
HAP2	B123	ZAOSHUXIANGHEIMI::[B123]		indx	I		De novo assembled	G	C	C	C	G	C	A	A	G	G	G	T	G	T	C	A	A	G	C	T	C	A	G	C	G	C	C	A	T	C				G	G	G	A	T	C	C		A
HAP2	B118	ERGANGAI::[B118]		indx	I	sd1	De novo assembled	G	C	C	C	G	C	A	A	G	G	G	T	G	T	C	A	A	G	C	T	C	A	G	C	G	C	C	A	T	C				G	G	G	A	T	C	C		A
HAP2	IRIS 313-11326	BR 51-115-4::IRGC 43999-1::[IRIS 313-11326]	IRGC 127237	indx	Not assigned		De novo assembled	G	C	C	C	G	C	A	A	G	G	G	T	G	T	C	A	A	G	C	T	C	A	G	C	G	C	C	A	T	C				G	G	G	A	T	C	C		A
HAP2	CX25	CISANGGARUNG::[CX25]	IRGC 135867	ind1B	I		De novo assembled	G	C	C	C	G	C	A	A	G	G	G	T	G	T	C	A	A	G	C	T	C	A	G	C	G	C	C	A	T	C				G	G	G	A	T	C	C		A
HAP2	B076	MINBEIWANXIAN::[B076]		indx	I		De novo assembled	G	C	C	C	G	C	A	A	G	G	G	T	G	T	C	A	A	G	C	T	C	A	G	C	G	C	C	A	T	C				G	G	G	A	T	C	C		A
HAP2	B125	XIANGWANXIAN 3::[B125]		indx	I		De novo assembled	G	C	C	C	G	C	A	A	G	G	G	T	G	T	C	A	A	G	C	T	C	A	G	C	G	C	C	A	T	C				G	G	G	A	T	C	C		A
HAP2	IRIS 313-10300	CT 9506-18-7-1T-2::IRGC 116973-1::[IRIS 313-10300]	IRGC 125960	indx	I	sd1	De novo assembled	G	C	C	C	G	C	A	A	G	G	G	T	G	T	C	A	A	G	C	T	C	A	G	C	G	C	C	A	T	C				G	G	G	A	T	C	C		A
HAP2	IRIS 313-11493	AR 133::IRGC 53942-1::[IRIS 313-11493]	IRGC 127126	indx	I		De novo assembled	G	C	C	C	G	C	A	A	G	G	G	T	G	T	C	A	A	G	C	T	C	A	G	C	G	C	C	A	T	C				G	G	G	A	T	C	C		A
HAP2	RpBio226 (ISM)						De novo assembled	G	C	C	C	G	C	A	A	G	G	G	T	G	T	C	A	A	G	C	T	C	A	G	C	G	C	C	A	T	C				G	G	G	A	T	C	C		A
HAP2	BPT5204 (SM)						De novo assembled	G	C	C	C	G	C	A	A	G	G	G	T	G	T	C	A	A	G	C	T	C	A	G	C	G	C	C	A	T	C				G	G	G	A	T	C	C		A
HAP2	R99_QWGD01			ind			RGHUB/NCBI					G	C	A	A	G	G		T	G	T		A	A	G	C	T		A	G	C	G	C	C	A	T	C	A	A	G	G	G	G	A	T	C	C	C	A
HAP2	Shuhui498_			ind			RGHUB/NCBI					G	C	A	A	G	G		T	G	T		A	A	G	C	T		A	G	C	G	C	C	A	T	C	A	A	G	G	G	G	A	T	C	C	C	A
HAP2	OsR498_G05			ind			RGHUB/NCBI					G	C	A	A	G	G		T	G	T		A	A	G	C	T		A	G	C	G	C	C	A	T	C	A	A	G	G	G	G	A	T	C	C	C	A
HAP2	OsMH63_05G			ind			RGHUB/NCBI					G	C	A	A	G	G		T	G	T		A	A	G	C	T		A	G	C	G	C	C	A	T	C	A	A	G	G	G	G	A	T	C	C	C	A
HAP2	Minghui63_			ind			RGHUB/NCBI					G	C	A	A	G	G		T	G	T		A	A	G	C	T		A	G	C	G	C	C	A	T	C	A	A	G	G	G	G	A	T	C	C	C	A
HAP2	IRIS 313-9451	PAMAH S 18::IRGC 61322-1::[IRIS 313-9451]	IRGC 126140	indx			SNPseek					G	C	A	A	G	G	G	T	G		C/G	A	A	G	C	T	C	A	G	C	G		C	A	T	C				G	G	G	A	T	C	C		A
HAP2	IRIS 313-11239	B 737 G-KN-23-1::IRGC 39203-2::[IRIS 313-11239]	IRGC 127978	indx			SNPseek				C	G	C	A	A	G	G	G	T	G		C	A	A	G	C	T	C	A	G	C	G		C	A	T	C				G	G	G	A	T	C	C		A
HAP2	B073	JINXIBAI2::[B073]		indx			SNPseek				C	G	C	A	A	G	G	G	T	G		C	A	A	G	C	T	C	A	G	C	G		C	A	T	C				G	G	G	A	T	C	C		A
HAP2	B085	XUGUNUO::[B085]		ind1A		sd1	SNPseek				C	G	C	A	A	G	G		T	G			A	A	G	C	T	C	A	G	C	G		C	A	T	C				G	G	G	A	T	C	C		A
HAP2	CX108	ZIRI::[CX108]		admix			SNPseek				C	G	C	A	A	G	G	G	T	G		C	A	A	G	C	T	C/T	A	G	C/T	G		C	A	T	C				G	G	G	G/A	T	T/C	C		A
HAP2	CX342	WANXIAN 763::[CX342]	IRGC 136068	indx		sd1	SNPseek				C	G	C	A	A	G	G	G	T	G		C	A	A	G	C	T	C	A	G	C	G		C	A	T	C				G	G	G	A	T	C	C		A
HAP2	B239	ZHENDAO 232::[B239]	IRGC 136091	ind1A			SNPseek				C	G	C	A	A	G	G	G	T	G		C	A	A	G		T	C	G/A	G	C	G		C	A	T/C	C				G	G	G	G/A	T	C	C		A
HAP2	CX237	B6136-3-TB-0-1-5::[CX237]	IRGC 135834	ind1B			SNPseek				C	G	C	A	A	G	G	G	T	G		C	A	A	G	C	T	C	A	G	C	G			A	T	C				G	G	G	A	T	C	C		A
HAP2	CX376	NERICA-L-20::[CX376]	IRGC 136005	ind1B			SNPseek				C	G	C	A	A	G	G	G	T	G		C	A	A	G	C	T		A	G	C	G		C	A	T					G	G	G	A	T	C	C		A
HAP2	IRIS 313-11943	I 41::IRGC 75927-1::[IRIS 313-11943]	IRGC 127425	ind1A			SNPseek				C	G	C	A	C/A	G/A	G	G	T	G		C	A	A	G	C/A	T	C	G/A	G	C	G		C	A	T/C	T/C				G	G	G	G/A	T	T/C	C		A
HAP2	B094	ZINUO::[B094]		ind1A			SNPseek				C	G	C	A		G/A	G	G	T	G		C	A	A	G	C/A	T	C	G/A	G	C	G		C	A	T/C					G	G	G	G/A	T	T/C	C		A
HAP2	IRIS 313-9831	PODIWEE::IRGC 11938-1::[IRIS 313-9831]	IRGC 125872	indx			SNPseek				C	G	C	A	C/A		G	G	T	G		C	A	A	G	C/A	T	C	G/A	G	C	G		C	A	T/C	T				A/G	G	G	G/A	T	T/C	C		A
HAP2	B065	HUANGSIGUIZHAN::[B065]		indx			SNPseek				C	G	C	A	C/A		G	G	T	G		C	A	A	G		T	C		G	C	G		C	A	T					G	G	G	A	T	C	C		A
HAP2	IRIS 313-11276	ARC 15063::IRGC 41909-2::[IRIS 313-11276]	IRGC 132319	indx			SNPseek				C	G	C	A	A	G	G	G	T	G		C	G/A	G/A	G	C	C/T	C	G/A	G	C	T/G		C	G/A	T	T/C				A/G	G	A/G	G/A	C/T	C	C		A
HAP2	IRIS 313-9101	DARAWAL::IRGC 71514-1::[IRIS 313-9101]	IRGC 125724	admix			SNPseek				C	A/G		G/A	A	G	A/G	G	C/T	A/G		C	G/A	G/A	T/G	C	C/T	C	G/A		C	T/G		T/C	G/A	T	T/C				A/G	G	A/G	G/A	C/T	T/C	T/C		G/A
HAP2	IRIS 313-9404	YANGKUM (RED)::[IRIS 313-9404]	IRGC 117593	admix			SNPseek				C	A/G	T/C	G/A		G	A/G	G	C/T	A/G		C	G/A		T/G	C	C/T	C	G/A	G	C	T/G		T/C	G/A	T	T				A/G	G	A/G	G/A	C/T	T/C	T/C		G/A
HAP2	B047	ZHENFU 8::[B047]	IRGC 136092	temp			SNPseek				C			G	C/A	G		G	C/T	A/G		C	G	G	T/G	C	C/T	C		G	C	T		T		T						G					T/C		G/A
HAP2	CX89	M202::[CX89]	IRGC 135977	indx			SNPseek				C	G	C	A	A	G	G	G	T	G		C	A	A	G	C	T	C	A	G	C	G		C	A	T	C				G	G/C	G	A	T	C	C		A
HAP2	IRIS 313-11305	ARC 15373::IRGC 43166-2::[IRIS 313-11305]	IRGC 127964	indx			SNPseek				C	G	C	A	A	G	G	G	T	G		C	A	A	G	C	T	C	A	G	C	G		C	A	T	C				G	G	G	A	T	C	C		A
HAP2	IRIS 313-15900	IR 07F287::G1::[IRIS 313-15900]	IRGC 126960	indx		sd1	SNPseek				C	G	C	A	A	G	G	G	T	G		C	A	A	G	C	T	C	A	G	C	G		C	A	T	C				G	G	G	A	T	C	C		A
HAP2	IRIS 313-9400	NCS 964 C::IRGC 62604-1::[IRIS 313-9400]	IRGC 125854	indx			SNPseek				C	G	C	A	A	G	G	G	T	G		C	A	A	G	C	T	C	A	G	C	G		C	A	T	C				G	G	G	A	T	C	C		A
HAP2	IRIS 313-9140	81 A 32::IRGC 60162-1::[IRIS 313-9140]	IRGC 125631	temp			SNPseek				C	G	C	A	A	G	G	G	T	G		C	A	A	G	C	T	C	A	G	C	G		C	A	T	C				G	G	G	A	T	C	C		A
HAP2	IRIS 313-10285	SICAN::IRGC 117029-1::[IRIS 313-10285]	IRGC 121119	indx		sd1	SNPseek				C	G	C	A	A	G	G	G	T	G		C	A	A	G	C	T	C	A	G	C	G		C	A	T	C				G	G	G	A	T	C	C		A
HAP2	IRIS 313-8743	NIAO YAO::IRGC 5496-1::[IRIS 313-8743]	IRGC 126075	indx			SNPseek				C	G	C	A	A	G	G	G	T	G		C	A	A	G	C	T	C	A	G	C	G		C	A	T	C				G	G	G	A	T	C	C		A
HAP2	IRIS 313-9424	ARC 5840::IRGC 12144-1::[IRIS 313-9424]	IRGC 125656	indx			SNPseek				C	G	C	A	A	G	G	G	T	G		C	A	A	G	C	T	C	A	G	C	G		C	A	T	C				G	G	G	A	T	C	C		A
HAP2	IRIS 313-10333	B 6136-3-TB-0-1-5::IRGC 117312-1::[IRIS 313-10333]	IRGC 125951	ind1B			SNPseek				C	G	C	A	A	G	G	G	T	G		C	A	A	G	C	T	C	A	G	C	G		C	A	T	C				G	G	G	A	T	C	C		A
HAP2	IRIS 313-10403	IRGA 659-1-2-2-2::IRGC 117345-1::[IRIS 313-10403]	IRGC 120993	indx		sd1	SNPseek				C	G	C	A	A	G	G	G	T	G		C	A	A	G	C	T	C	A	G	C	G		C	A	T	C				G	G	G	A	T	C	C		A
HAP2	IRIS 313-8453	ARC 18597::IRGC 43299-1::[IRIS 313-8453]	IRGC 126043	indx			SNPseek				C	G	C	A	A	G	G	G	T	G		C	A	A	G	C	T	C	A	G	C	G		C	A	T	C				G	G	G	A	T	C	C		A
HAP2	IRIS 313-8454	LAI YIP ZIM::IRGC 4955-1::[IRIS 313-8454]	IRGC 125618	ind1A			SNPseek				C	G	C	A	A	G	G	G	T	G		C	A	A	G	C	T	C	A	G	C	G		C	A	T	C				G	G	G	A	T	C	C		A
HAP2	IRIS 313-8458	ARC 18175::IRGC 42316-1::[IRIS 313-8458]	IRGC 131928	indx			SNPseek				C	G	C	A	A	G	G	G	T	G		C	A	A	G	C	T	C	A	G	C	G		C	A	T	C				G	G	G	A	T	C	C		A
HAP2	IRIS 313-8514	DAA MANSA::IRGC 67559-1::[IRIS 313-8514]	IRGC 126196	ind1B		sd1	SNPseek				C	G	C	A	A	G	G	G	T	G		C	A	A	G	C	T	C	A	G	C	G		C	A	T	C				G	G	G	A	T	C	C		A
HAP2	IRIS 313-8585	ARC 11901::IRGC 21727-1::[IRIS 313-8585]	IRGC 127033	indx			SNPseek				C	G	C	A	A	G	G	G	T	G		C	A	A	G	C	T	C	A	G	C	G		C	A	T	C				G	G	G	A	T	C	C		A
HAP2	IRIS 313-8621	ARC 11663::IRGC 42695-1::[IRIS 313-8621]	IRGC 126174	ind1B		sd1	SNPseek				C	G	C	A	A	G	G	G	T	G		C	A	A	G	C	T	C	A	G	C	G		C	A	T	C				G	G	G	A	T	C	C		A
HAP2	IRIS 313-8659	YA THAY SAN::IRGC 58245-1::[IRIS 313-8659]		indx			SNPseek				C	G	C	A	A	G	G	G	T	G		C	A	A	G	C	T	C	A	G	C	G		C	A	T	C				G	G	G	A	T	C	C		A
HAP2	IRIS 313-8757	NIRGUNI::IRGC 61127-1::[IRIS 313-8757]	IRGC 126000	ind2			SNPseek				C	G	C	A	A	G	G	G	T	G		C	A	A	G	C	T	C	A	G	C	G		C	A	T	C				G	G	G	A	T	C	C		A
HAP2	IRIS 313-8846	BAIANG 6::IRGC 6129-1::[IRIS 313-8846]	IRGC 125668	indx			SNPseek				C	G	C	A	A	G	G	G	T	G		C	A	A	G	C	T	C	A	G	C	G		C	A	T	C				G	G	G	A	T	C	C		A
HAP2	IRIS 313-8854	CHAKOL::IRGC 77226-1::[IRIS 313-8854]	IRGC 125696	ind2			SNPseek				C	G	C	A	A	G	G	G	T	G		C	A	A	G	C	T	C	A	G	C	G		C	A	T	C				G	G	G	A	T	C	C		A
HAP2	IRIS 313-8900	ARC 14654::IRGC 41663-1::[IRIS 313-8900]	IRGC 125650	ind2			SNPseek				C	G	C	A	A	G	G	G	T	G		C	A	A	G	C	T	C	A	G	C	G		C	A	T	C				G	G	G	A	T	C	C		A
HAP2	IRIS 313-8968	KALU ILANKALAYAN::IRGC 36270-1::[IRIS 313-8968]	IRGC 125792	ind2			SNPseek				C	G	C	A	A	G	G	G	T	G		C	A	A	G	C	T	C	A	G	C	G		C	A	T	C				G	G	G	A	T	C	C		A
HAP2	IRIS 313-8982	ARC 18112::IRGC 42274-1::[IRIS 313-8982]	IRGC 125655	indx			SNPseek				C	G	C	A	A	G	G	G	T	G		C	A	A	G	C	T	C	A	G	C	G		C	A	T	C				G	G	G	A	T	C	C		A
HAP2	IRIS 313-9023	CR 60-10::IRGC 15777-1::[IRIS 313-9023]	IRGC 125715	indx		sd1	SNPseek				C	G	C	A	A	G	G	G	T	G		C	A	A	G	C	T	C	A	G	C	G		C	A	T	C				G	G	G	A	T	C	C		A
HAP2	IRIS 313-9184	XI GAN JING REN::IRGC 60035-1::[IRIS 313-9184]	IRGC 126014	indx			SNPseek				C	G	C	A	A	G	G	G	T	G		C	A	A	G	C	T	C	A	G	C	G		C	A	T	C				G	G	G	A	T	C	C		A
HAP2	IRIS 313-9262	JHODI BIRUN::IRGC 31812-1::[IRIS 313-9262]	IRGC 125785	ind2			SNPseek				C	G	C	A	A	G	G	G	T	G		C	A	A	G	C	T	C	A	G	C	G		C	A	T	C				G	G	G	A	T	C	C		A
HAP2	IRIS 313-9287	SONAMUKHI::IRGC 46693-1::[IRIS 313-9287]	IRGC 126161	ind2			SNPseek				C	G	C	A	A	G	G	G	T	G		C	A	A	G	C	T	C	A	G	C	G		C	A	T	C				G	G	G	A	T	C	C		A
HAP2	IRIS 313-9391	KALABAIL::IRGC 25877-1::[IRIS 313-9391]	IRGC 125789	ind2			SNPseek				C	G	C	A	A	G	G	G	T	G		C	A	A	G	C	T	C	A	G	C	G		C	A	T	C				G	G	G	A	T	C	C		A
HAP2	IRIS 313-9427	ARC 18092::IRGC 42256-1::[IRIS 313-9427]	IRGC 125654	indx			SNPseek				C	G	C	A	A	G	G	G	T	G		C	A	A	G	C	T	C	A	G	C	G		C	A	T	C				G	G	G	A	T	C	C		A
HAP2	IRIS 313-9566	RP 9-4::IRGC 39735-1::[IRIS 313-9566]	IRGC 126004	ind1B		sd1	SNPseek				C	G	C	A	A	G	G	G	T	G		C	A	A	G	C	T	C	A	G	C	G		C	A	T	C				G	G	G	A	T	C	C		A
HAP2	IRIS 313-9572	ASU::IRGC 62154-1::[IRIS 313-9572]	IRGC 125658	indx			SNPseek				C	G	C	A	A	G	G	G	T	G		C	A	A	G	C	T	C	A	G	C	G		C	A	T	C				G	G	G	A	T	C	C		A
HAP2	IRIS 313-9594	ASHI BINNI::IRGC 77216-1::[IRIS 313-9594]	IRGC 126131	indx			SNPseek				C	G	C	A	A	G	G	G	T	G		C	A	A	G	C	T	C	A	G	C	G		C	A	T	C				G	G	G	A	T	C	C		A
HAP2	IRIS 313-9706	TAIPEI WOO CO::IRGC 112-1::[IRIS 313-9706]	IRGC 125913	ind1A			SNPseek				C	G	C	A	A	G	G	G	T	G		C	A	A	G	C	T	C	A	G	C	G		C	A	T	C				G	G	G	A	T	C	C		A
HAP2	IRIS 313-9917	CHANDINA::IRGC 36420-1::[IRIS 313-9917]	IRGC 125699	ind1B		sd1	SNPseek				C	G	C	A	A	G	G	G	T	G		C	A	A	G	C	T	C	A	G	C	G		C	A	T	C				G	G	G	A	T	C	C		A
HAP2	IRIS 313-9940	TIKAL 3::IRGC 50649-1::[IRIS 313-9940]	IRGC 125923	ind1B		sd1	SNPseek				C	G	C	A	A	G	G	G	T	G		C	A	A	G	C	T	C	A	G	C	G		C	A	T	C				G	G	G	A	T	C	C		A
HAP2	IRIS 313-9966	CICA 9::IRGC 53079-1::[IRIS 313-9966]	IRGC 125713	ind1B		sd1	SNPseek				C	G	C	A	A	G	G	G	T	G		C	A	A	G	C	T	C	A	G	C	G		C	A	T	C				G	G	G	A	T	C	C		A
HAP2	IRIS 313-10034	RIZ INDETERMINE::IRGC 69014-1::[IRIS 313-10034]	IRGC 125886	indx			SNPseek				C	G	C	A	A	G	G	G	T	G		C	A	A	G	C	T	C	A	G	C	G		C	A	T	C				G	G	G	A	T	C	C		A
HAP2	IRIS 313-10054	TOC 5430::IRGC 70487-1::[IRIS 313-10054]	IRGC 125924	indx		sd1	SNPseek				C	G	C	A	A	G	G	G	T	G		C	A	A	G	C	T	C	A	G	C	G		C	A	T	C				G	G	G	A	T	C	C		A
HAP2	IRIS 313-10113	EX FOILAEIN (NAPUTO)::IRGC 81675-1::[IRIS 313-10113]	IRGC 125736	indx			SNPseek				C	G	C	A	A	G	G	G	T	G		C	A	A	G	C	T	C	A	G	C	G		C	A	T	C				G	G	G	A	T	C	C		A
HAP2	IRIS 313-10179	GUI HUA ZAO::IRGC 68060-1::[IRIS 313-10179]	IRGC 125755	indx			SNPseek				C	G	C	A	A	G	G	G	T	G		C	A	A	G	C	T	C	A	G	C	G		C	A	T	C				G	G	G	A	T	C	C		A
HAP2	IRIS 313-10189	DA NUO (ZHAN)::IRGC 72025-1::[IRIS 313-10189]	IRGC 125723	ind1A			SNPseek				C	G	C	A	A	G	G	G	T	G		C	A	A	G	C	T	C	A	G	C	G		C	A	T	C				G	G	G	A	T	C	C		A
HAP2	IRIS 313-10226	TONG GU HONG::IRGC 81026-1::[IRIS 313-10226]	IRGC 125925	indx			SNPseek				C	G	C	A	A	G	G	G	T	G		C	A	A	G	C	T	C	A	G	C	G		C	A	T	C				G	G	G	A	T	C	C		A
HAP2	IRIS 313-10239	LIU XU::IRGC 109232-1::[IRIS 313-10239]	IRGC 125827	indx			SNPseek				C	G	C	A	A	G	G	G	T	G		C	A	A	G	C	T	C	A	G	C	G		C	A	T	C				G	G	G	A	T	C	C		A
HAP2	IRIS 313-10260	CEA 3::IRGC 116965-1::[IRIS 313-10260]	IRGC 125957	indx		sd1	SNPseek				C	G	C	A	A	G	G	G	T	G		C	A	A	G	C	T	C	A	G	C	G		C	A	T	C				G	G	G	A	T	C	C		A
HAP2	IRIS 313-10275	ICTA MOTAGUA::IRGC 116995-1::[IRIS 313-10275]	IRGC 125968	indx		sd1	SNPseek				C	G	C	A	A	G	G	G	T	G		C	A	A	G	C	T	C	A	G	C	G		C	A	T	C				G	G	G	A	T	C	C		A
HAP2	IRIS 313-10279	JUMA 62::IRGC 117011-1::[IRIS 313-10279]	IRGC 126066	indx		sd1	SNPseek				C	G	C	A	A	G	G	G	T	G		C	A	A	G	C	T	C	A	G	C	G		C	A	T	C				G	G	G	A	T	C	C		A
HAP2	IRIS 313-10301	IRGA 959-1-2-2F-4-1-4A-6-CA-6X::IRGC 117006-1::[IRIS 313-10301]	IRGC 126064	indx		sd1	SNPseek				C	G	C	A	A	G	G	G	T	G		C	A	A	G	C	T	C	A	G	C	G		C	A	T	C				G	G	G	A	T	C	C		A
HAP2	IRIS 313-10314	INIAP 10::IRGC 117000-1::[IRIS 313-10314]	IRGC 125969	indx			SNPseek				C	G	C	A	A	G	G	G	T	G		C	A	A	G	C	T	C	A	G	C	G		C	A	T	C				G	G	G	A	T	C	C		A
HAP2	IRIS 313-10353	HP 3319-2WX-6-4-1-B::IRGC 117331-1::[IRIS 313-10353]	IRGC 127049	indx			SNPseek				C	G	C	A	A	G	G	G	T	G		C	A	A	G	C	T	C	A	G	C	G		C	A	T	C				G	G	G	A	T	C	C		A
HAP2	IRIS 313-8699	BALASURIYA A::IRGC 66509-1::[IRIS 313-8699]	IRGC 126178	indx			SNPseek				C	G	C	A	A	G	G	G	T	G		C	A	A	G	C	T	C	A	G	C	G		C	A	T	C				G	G	G	A	T	C	C		A
HAP2	IRIS 313-8305	URAIBOOL::IRGC 52785-1::[IRIS 313-8305]	IRGC 126289	ind2			SNPseek				C	G	C	A	A	G	G	G	T	G		C	A	A	G	C	T	C	A	G	C	G		C	A	T	C				G	G	G	A	T	C	C		A
HAP2	IRIS 313-9619	ARC 15845::IRGC 42151-1::[IRIS 313-9619]		indx			SNPseek				C	G	C	A	A	G	G	G	T	G		C	A	A	G	C	T	C	A	G	C	G		C	A	T	C				G	G	G	A	T	C	C		A
HAP2	IRIS 313-10220	EPEAL 102::IRGC 78698-1::[IRIS 313-10220]	IRGC 126203	indx		sd1	SNPseek				C	G	C	A	A	G	G	G	T	G		C	A	A	G	C	T	C	A	G	C	G		C	A	T	C				G	G	G	A	T	C	C		A
HAP2	IRIS 313-10268	FONAIAP 2::IRGC 116985-1::[IRIS 313-10268]	IRGC 127072	indx			SNPseek				C	G	C	A	A	G	G	G	T	G		C	A	A	G	C	T	C	A	G	C	G		C	A	T	C				G	G	G	A	T	C	C		A
HAP2	IRIS 313-10332	B 4414 F-MR-6-3::IRGC 117310-1::[IRIS 313-10332]	IRGC 126044	indx			SNPseek				C	G	C	A	A	G	G	G	T	G		C	A	A	G	C	T	C	A	G	C	G		C	A	T	C				G	G	G	A	T	C	C		A
HAP2	IRIS 313-10398	IRGA 318-11-9-2A::IRGC 117340-1::[IRIS 313-10398]	IRGC 126030	ind1B		sd1	SNPseek				C	G	C	A	A	G	G	G	T	G		C	A	A	G	C	T	C	A	G	C	G		C	A	T	C				G	G	G	A	T	C	C		A
HAP2	IRIS 313-8068	ORIONE::GERVEX 333-C1::[IRIS 313-8068]	IRGC 122184	indx			SNPseek				C	G	C	A	A	G	G	G	T	G		C	A	A	G	C	T	C	A	G	C	G		C	A	T	C				G	G	G	A	T	C	C		A
HAP2	IRIS 313-7665	CT 6510-24-1-2::C1::[IRIS 313-7665]	IRGC 122025	indx			SNPseek				C	G	C	A	A	G	G	G	T	G		C	A	A	G	C	T	C	A	G	C	G		C	A	T	C				G	G	G	A	T	C	C		A
HAP2	IRIS 313-7808	WAS 173-B-B-6-2-2::C1::[IRIS 313-7808]	IRGC 122285	ind1B		sd1	SNPseek				C	G	C	A	A	G	G	G	T	G		C	A	A	G	C	T	C	A	G	C	G		C	A	T	C				G	G	G	A	T	C	C		A
HAP2	IRIS 313-7780	SONA::IRGC 26971-C1::[IRIS 313-7780]	IRGC 122255	indx			SNPseek				C	G	C	A	A	G	G	G	T	G		C	A	A	G	C	T	C	A	G	C	G		C	A	T	C				G	G	G	A	T	C	C		A
HAP2	IRIS 313-7770	SAMBALA MALO::C1::[IRIS 313-7770]	IRGC 122239	ind1B		sd1	SNPseek				C	G	C	A	A	G	G	G	T	G		C	A	A	G	C	T	C	A	G	C	G		C	A	T	C				G	G	G	A	T	C	C		A
HAP2	IRIS 313-7792	TSIPALA 1231::GERVEX 8418-C1::[IRIS 313-7792]	IRGC 124425	indx			SNPseek				C	G	C	A	A	G	G	G	T	G		C	A	A	G	C	T	C	A	G	C	G		C	A	T	C				G	G	G	A	T	C	C		A
HAP2	IRIS 313-7820	WAS 206-B-B-2-2-1::C1::[IRIS 313-7820]	IRGC 122290	ind1B		sd1	SNPseek				C	G	C	A	A	G	G	G	T	G		C	A	A	G	C	T	C	A	G	C	G		C	A	T	C				G	G	G	A	T	C	C		A
HAP2	IRIS 313-7797	UPL RI 7::IRTP 9897-C1::[IRIS 313-7797]	IRGC 122272	indx			SNPseek				C	G	C	A	A	G	G	G	T	G		C	A	A	G	C	T	C	A	G	C	G		C	A	T	C				G	G	G	A	T	C	C		A
HAP2	IRIS 313-7664	CICA 8::C1::[IRIS 313-7664]	IRGC 122011	ind1B		sd1	SNPseek				C	G	C	A	A	G	G	G	T	G		C	A	A	G	C	T	C	A	G	C	G		C	A	T	C				G	G	G	A	T	C	C		A
HAP2	IRIS 313-7809	WAS 174-B-3-5::C1::[IRIS 313-7809]	IRGC 122286	indx		sd1	SNPseek				C	G	C	A	A	G	G	G	T	G		C	A	A	G	C	T	C	A	G	C	G		C	A	T	C				G	G	G	A	T	C	C		A
HAP2	IRIS 313-11447	TUNAGANNAPNANG::IRGC 52046-1::[IRIS 313-11447]	IRGC 128492	indx			SNPseek				C	G	C	A	A	G	G	G	T	G		C	A	A	G	C	T	C	A	G	C	G		C	A	T	C				G	G	G	A	T	C	C		A
HAP2	IRIS 313-11506	K 15591-4::IRGC 55043-1::[IRIS 313-11506]	IRGC 127470	indx			SNPseek				C	G	C	A	A	G	G	G	T	G		C	A	A	G	C	T	C	A	G	C	G		C	A	T	C				G	G	G	A	T	C	C		A
HAP2	IRIS 313-11513	CHATO::IRGC 55825-1::[IRIS 313-11513]	IRGC 127269	ind1B		sd1	SNPseek				C	G	C	A	A	G	G	G	T	G		C	A	A	G	C	T	C	A	G	C	G		C	A	T	C				G	G	G	A	T	C	C		A
HAP2	IRIS 313-11516	IR 3839-1::IRGC 55946-1::[IRIS 313-11516]	IRGC 127437	indx			SNPseek				C	G	C	A	A	G	G	G	T	G		C	A	A	G	C	T	C	A	G	C	G		C	A	T	C				G	G	G	A	T	C	C		A
HAP2	IRIS 313-11572	BAI MI TIE QIU::IRGC 59414-1::[IRIS 313-11572]	IRGC 127201	ind1A			SNPseek				C	G	C	A	A	G	G	G	T	G		C	A	A	G	C	T	C	A	G	C	G		C	A	T	C				G	G	G	A	T	C	C		A
HAP2	IRIS 313-11576	JIANG HUI DAO::IRGC 59688-1::[IRIS 313-11576]	IRGC 127459	indx			SNPseek				C	G	C	A	A	G	G	G	T	G		C	A	A	G	C	T	C	A	G	C	G		C	A	T	C				G	G	G	A	T	C	C		A
HAP2	IRIS 313-11577	LANG QIAN CHE::IRGC 59730-1::[IRIS 313-11577]	IRGC 127551	ind1A			SNPseek				C	G	C	A	A	G	G	G	T	G		C	A	A	G	C	T	C	A	G	C	G		C	A	T	C				G	G	G	A	T	C	C		A
HAP2	IRIS 313-11580	TAI ZHOU XIAN::IRGC 59912-1::[IRIS 313-11580]	IRGC 127840	indx			SNPseek				C	G	C	A	A	G	G	G	T	G		C	A	A	G	C	T	C	A	G	C	G		C	A	T	C				G	G	G	A	T	C	C		A
HAP2	IRIS 313-11621	UPRH 265::IRGC 61689-1::[IRIS 313-11621]	IRGC 127877	indx			SNPseek				C	G	C	A	A	G	G	G	T	G		C	A	A	G	C	T	C	A	G	C	G		C	A	T	C				G	G	G	A	T	C	C		A
HAP2	IRIS 313-11695	HSIN-T'AO YUAN CHING YU::IRGC 65074-1::[IRIS 313-11695]	IRGC 127421	ind1A			SNPseek				C	G	C	A	A	G	G	G	T	G		C	A	A	G	C	T	C	A	G	C	G		C	A	T	C				G	G	G	A	T	C	C		A
HAP2	IRIS 313-11717	JATI MANI::IRGC 66565-1::[IRIS 313-11717]	IRGC 127450	indx			SNPseek				C	G	C	A	A	G	G	G	T	G		C	A	A	G	C	T	C	A	G	C	G		C	A	T	C				G	G	G	A	T	C	C		A
HAP2	IRIS 313-11729	MEI LIU ZAO 5::IRGC 67231-1::[IRIS 313-11729]	IRGC 127622	indx		sd1	SNPseek				C	G	C	A	A	G	G	G	T	G		C	A	A	G	C	T	C	A	G	C	G		C	A	T	C				G	G	G	A	T	C	C		A
HAP2	IRIS 313-11730	QING ER XIAO 2::IRGC 67255-1::[IRIS 313-11730]	IRGC 127753	indx			SNPseek				C	G	C	A	A	G	G	G	T	G		C	A	A	G	C	T	C	A	G	C	G		C	A	T	C				G	G	G	A	T	C	C		A
HAP2	IRIS 313-11732	QING ZAO 3::IRGC 67281-1::[IRIS 313-11732]	IRGC 127755	ind1A		sd1	SNPseek				C	G	C	A	A	G	G	G	T	G		C	A	A	G	C	T	C	A	G	C	G		C	A	T	C				G	G	G	A	T	C	C		A
HAP2	IRIS 313-11733	SHUANG BAI AI 2::IRGC 67309-1::[IRIS 313-11733]	IRGC 127801	ind1A		sd1	SNPseek				C	G	C	A	A	G	G	G	T	G		C	A	A	G	C	T	C	A	G	C	G		C	A	T	C				G	G	G	A	T	C	C		A
HAP2	IRIS 313-11734	SI CHAO 1::IRGC 67335-1::[IRIS 313-11734]	IRGC 127803	ind1A		sd1	SNPseek				C	G	C	A	A	G	G	G	T	G		C	A	A	G	C	T	C	A	G	C	G		C	A	T	C				G	G	G	A	T	C	C		A
HAP2	IRIS 313-11735	YI LI ZHONG::IRGC 67382-1::[IRIS 313-11735]	IRGC 127904	indx			SNPseek				C	G	C	A	A	G	G	G	T	G		C	A	A	G	C	T	C	A	G	C	G		C	A	T	C				G	G	G	A	T	C	C		A
HAP2	IRIS 313-11744	AI JIAO AO FAN ZI::IRGC 67871-1::[IRIS 313-11744]	IRGC 127114	indx			SNPseek				C	G	C	A	A	G	G	G	T	G		C	A	A	G	C	T	C	A	G	C	G		C	A	T	C				G	G	G	A	T	C	C		A
HAP2	IRIS 313-11745	AN FU ZHAN::IRGC 67878-1::[IRIS 313-11745]	IRGC 127123	ind1A			SNPseek				C	G	C	A	A	G	G	G	T	G		C	A	A	G	C	T	C	A	G	C	G		C	A	T	C				G	G	G	A	T	C	C		A
HAP2	IRIS 313-11750	L 10595::IRGC 68109-1::[IRIS 313-11750]	IRGC 127538	indx			SNPseek				C	G	C	A	A	G	G	G	T	G		C	A	A	G	C	T	C	A	G	C	G		C	A	T	C				G	G	G	A	T	C	C		A
HAP2	IRIS 313-11763	PJ 110::IRGC 68981-1::[IRIS 313-11763]	IRGC 127734	indx		sd1	SNPseek				C	G	C	A	A	G	G	G	T	G		C	A	A	G	C	T	C	A	G	C	G		C	A	T	C				G	G	G	A	T	C	C		A
HAP2	IRIS 313-11807	R 582::IRGC 70504-1::[IRIS 313-11807]	IRGC 127757	indx		sd1	SNPseek				C	G	C	A	A	G	G	G	T	G		C	A	A	G	C	T	C	A	G	C	G		C	A	T	C				G	G	G	A	T	C	C		A
HAP2	IRIS 313-11858	DA TIE ZHAN::IRGC 72029-1::[IRIS 313-11858]	IRGC 127300	ind1A			SNPseek				C	G	C	A	A	G	G	G	T	G		C	A	A	G	C	T	C	A	G	C	G		C	A	T	C				G	G	G	A	T	C	C		A
HAP2	IRIS 313-11798	E ZI 100::IRGC 70192-1::[IRIS 313-11798]	IRGC 127365	ind1B			SNPseek				C	G	C	A	A	G	G	G	T	G		C	A	A	G	C	T	C	A	G	C	G		C	A	T	C				G	G	G	A	T	C	C		A
HAP2	IRIS 313-11910	YU HE HONG::IRGC 74266-1::[IRIS 313-11910]	IRGC 127907	indx			SNPseek				C	G	C	A	A	G	G	G	T	G		C	A	A	G	C	T	C	A	G	C	G		C	A	T	C				G	G	G	A	T	C	C		A
HAP2	IRIS 313-11911	YUN NAN ZHAN::IRGC 74272-1::[IRIS 313-11911]	IRGC 127908	ind1A			SNPseek				C	G	C	A	A	G	G	G	T	G		C	A	A	G	C	T	C	A	G	C	G		C	A	T	C				G	G	G	A	T	C	C		A
HAP2	IRIS 313-11937	KUNJUKUNJU::IRGC 75448-1::[IRIS 313-11937]	IRGC 127535	indx		sd1	SNPseek				C	G	C	A	A	G	G	G	T	G		C	A	A	G	C	T	C	A	G	C	G		C	A	T	C				G	G	G	A	T	C	C		A
HAP2	IRIS 313-11957	DAW LUEY 4-3::IRGC 76929-1::[IRIS 313-11957]	IRGC 127305	indx			SNPseek				C	G	C	A	A	G	G	G	T	G		C	A	A	G	C	T	C	A	G	C	G		C	A	T	C				G	G	G	A	T	C	C		A
HAP2	IRIS 313-11959	KAGIOS PUTI::IRGC 76965-1::[IRIS 313-11959]	IRGC 135756	ind3			SNPseek				C	G	C	A	A	G	G	G	T	G		C	A	A	G	C	T	C	A	G	C	G		C	A	T	C				G	G	G	A	T	C	C		A
HAP2	IRIS 313-11967	TANG DU GU::IRGC 77400-1::[IRIS 313-11967]	IRGC 127846	indx			SNPseek				C	G	C	A	A	G	G	G	T	G		C	A	A	G	C	T	C	A	G	C	G		C	A	T	C				G	G	G	A	T	C	C		A
HAP2	IRIS 313-11969	SHYAMJIRA::IRGC 77522-1::[IRIS 313-11969]	IRGC 135795	ind2			SNPseek				C	G	C	A	A	G	G	G	T	G		C	A	A	G	C	T	C	A	G	C	G		C	A	T	C				G	G	G	A	T	C	C		A
HAP2	IRIS 313-11978	IR 5657-33-2::IRGC 77992-1::[IRIS 313-11978]	IRGC 127440	ind1B		sd1	SNPseek				C	G	C	A	A	G	G	G	T	G		C	A	A	G	C	T	C	A	G	C	G		C	A	T	C				G	G	G	A	T	C	C		A
HAP2	IRIS 313-12028	CHAO BONG::IRGC 80266-2::[IRIS 313-12028]	IRGC 132328	indx			SNPseek				C	G	C	A	A	G	G	G	T	G		C	A	A	G	C	T	C	A	G	C	G		C	A	T	C				G	G	G	A	T	C	C		A
HAP2	IRIS 313-12057	AI JIAO ZI::IRGC 82255-1::[IRIS 313-12057]	IRGC 127116	indx			SNPseek				C	G	C	A	A	G	G	G	T	G		C	A	A	G	C	T	C	A	G	C	G		C	A	T	C				G	G	G	A	T	C	C		A
HAP2	IRIS 313-12093	KARUEL::IRGC 83792-1::[IRIS 313-12093]	IRGC 128334	indx			SNPseek				C	G	C	A	A	G	G	G	T	G		C	A	A	G		T	C	A	G	C	G		C	A	T	C				G	G	G	A	T	C	C		A
HAP2	IRIS 313-12109	ARITH::IRGC 84347-2::[IRIS 313-12109]	IRGC 127975	ind3			SNPseek				C	G	C	A	A	G	G	G	T	G		C	A	A	G	C	T	C	A	G	C	G		C	A	T	C				G	G	G	A	T	C	C		A
HAP2	IRIS 313-12180	JHINUWA DHAN::IRGC 88545-1::[IRIS 313-12180]	IRGC 128323	indx			SNPseek				C	G	C	A	A	G	G	G	T	G		C	A	A	G	C	T	C	A	G	C	G		C	A	T	C				G	G	G	A	T	C	C		A
HAP2	IRIS 313-12190	CHAO KHAW NYAO::IRGC 89460-1::[IRIS 313-12190]	IRGC 131975	indx			SNPseek				C	G	C	A	A	G	G	G	T	G		C	A	A	G	C	T	C	A	G	C	G		C	A	T	C				G	G	G	A	T	C	C		A
HAP2	IRIS 313-12232	TE SAN AI 2::IRGC 93355-1::[IRIS 313-12232]	IRGC 127852	indx		sd1	SNPseek				C	G	C	A	A	G	G	G	T	G		C	A	A	G	C	T	C	A	G	C	G		C	A	T	C				G	G	G	A	T	C	C		A
HAP2	IRIS 313-12234	ANLINGWUBAILI::IRGC 93363-1::[IRIS 313-12234]	IRGC 127124	ind1B			SNPseek				C	G	C	A	A	G	G	G	T	G		C	A	A	G	C	T	C	A	G	C	G		C	A	T	C				G	G	G	A	T	C	C		A
HAP2	IRIS 313-12269	SHWEWARHNAN::IRGC 96053-1::[IRIS 313-12269]	IRGC 127802	indx			SNPseek				C	G	C	A	A	G	G	G	T	G		C	A	A	G	C	T	C	A	G	C	G		C	A	T	C				G	G	G	A	T	C	C		A
HAP2	IRIS 313-12273	AIJIAONANTE::IRGC 96974-1::[IRIS 313-12273]	IRGC 127115	ind1A			SNPseek				C	G	C	A	A	G	G	G	T	G		C	A	A	G	C	T	C	A	G	C	G		C	A	T	C				G	G	G	A	T	C	C		A
HAP2	IRIS 313-12291	NGA CHEKH FAT::IRGC 97701-2::[IRIS 313-12291]	IRGC 132358	indx			SNPseek				C	G	C	A	A	G	G	G	T	G		C	A	A	G	C	T	C	A	G	C	G		C	A	T	C				G	G	G	A	T	C	C		A
HAP2	IRIS 313-10547	C 34-13::IRGC 6797-2::[IRIS 313-10547]	IRGC 128007	indx			SNPseek				C	G	C	A	A	G	G	G	T	G		C	A	A	G	C	T	C	A	G	C	G		C	A	T	C				G	G	G	A	T	C	C		A
HAP2	IRIS 313-10562	SENG CHUI LIN::IRGC 7313-1::[IRIS 313-10562]	IRGC 128463	japx			SNPseek				C	G	C	A	A	G	G	G	T	G		C	A	A	G	C	T	C	A	G	C	G		C	A	T	C				G	G	G	A	T	C	C		A
HAP2	IRIS 313-10655	EA HOUM::IRGC 11783-1::[IRIS 313-10655]	IRGC 128285	indx			SNPseek				C	G	C	A	A	G	G	G	T	G		C	A	A	G	C	T	C	A	G	C	G		C	A	T	C				G	G	G	A	T	C	C		A
HAP2	IRIS 313-10675	ARC 10905::IRGC 12669-1::[IRIS 313-10675]	IRGC 127132	indx			SNPseek				C	G	C	A	A	G	G	G	T	G		C	A	A	G	C	T	C	A	G	C	G		C	A	T	C				G	G	G	A	T	C	C		A
HAP2	IRIS 313-10717	PERIYA VELLAI::IRGC 15475-1::[IRIS 313-10717]	IRGC 127725	ind2			SNPseek				C	G	C	A	A	G	G	G	T	G		C	A	A	G	C	T	C	A	G	C	G		C	A	T	C				G	G	G	A	T	C	C		A
HAP2	IRIS 313-10811	SEMPOR::IRGC 18761-2::[IRIS 313-10811]	IRGC 128160	indx			SNPseek				C	G	C	A	A	G	G	G	T	G		C	A	A	G	C	T	C	A	G	C	G		C	A	T	C				G	G	G	A	T	C	C		A
HAP2	IRIS 313-10847	ARC 6015::IRGC 20314-2::[IRIS 313-10847]	IRGC 127972	indx			SNPseek				C	G	C	A	A	G	G	G	T	G		C	A	A	G	C	T	C	A	G	C	G		C	A	T	C				G	G	G	A	T	C	C		A
HAP2	IRIS 313-10859	ARC 10939::IRGC 21150-2::[IRIS 313-10859]	IRGC 127933	indx			SNPseek				C	G	C	A	A	G	G	G	T	G		C	A	A	G	C	T	C	A	G	C	G		C	A	T	C				G	G	G	A	T	C	C		A
HAP2	IRIS 313-10924	ATH HAGARI JARAHAN PADDY::IRGC 23796-1::[IRIS 313-10924]	IRGC 127176	indx			SNPseek				C	G	C	A	A	G	G	G	T	G		C	A	A	G	C	T	C	A	G	C	G		C	A	T	C				G	G	G	A	T	C	C		A
HAP2	IRIS 313-10980	DUDHSAR::IRGC 26458-1::[IRIS 313-10980]	IRGC 127344	admix			SNPseek				C	G	C	A	A	G	G	G	T	G		C	A	A	G	C	T	C	A	G	C	G		C	A	T	C				G	G	G	A	T	C	C		A
HAP2	IRIS 313-10990	BALIBUD::IRGC 26871-1::[IRIS 313-10990]	IRGC 127206	indx			SNPseek				C	G	C	A	A	G	G	G	T	G		C	A	A	G	C	T	C	A	G	C	G		C	A	T	C				G	G	G	A	T	C	C		A
HAP2	IRIS 313-11071	CHAO HAI::IRGC 29450-2::[IRIS 313-11071]	IRGC 128011	indx			SNPseek				C	G	C	A	A	G	G	G	T	G		C	A	A	G	C	T	C	A	G	C	G		C	A	T	C				G	G	G	A	T	C	C		A
HAP2	IRIS 313-11097	KALAGNON::IRGC 30335-1::[IRIS 313-11097]	IRGC 127478	indx			SNPseek				C	G	C	A	A	G	G	G	T	G		C	A	A	G	C	T	C	A	G	C	G		C	A	T	C				G	G	G	A	T	C	C		A
HAP2	IRIS 313-11146	THEEDAT NGASEIN::IRGC 33779-2::[IRIS 313-11146]	IRGC 128185	indx			SNPseek				C	G	C	A	A	G	G	G	T	G		C	A	A	G	C	T	C	A	G	C	G		C	A	T	C				G	G	G	A	T	C	C		A
HAP2	IRIS 313-11229	STRAW 23-428::IRGC 38416-2::[IRIS 313-11229]	IRGC 128171	ind2			SNPseek				C	G	C	A	A	G	G	G	T	G		C	A	A	G	C	T	C	A	G	C	G		C	A	T	C				G	G	G	A	T	C	C		A
HAP2	IRIS 313-11233	SPR 7284-57-5::IRGC 38649-1::[IRIS 313-11233]	IRGC 127823	ind1B		sd1	SNPseek				C	G	C	A	A	G	G	G	T	G		C	A	A	G	C	T	C	A	G	C	G		C	A	T	C				G	G	G	A	T	C	C		A
HAP2	IRIS 313-11234	LIGUNGTUNG::IRGC 38786-1::[IRIS 313-11234]	IRGC 127563	indx			SNPseek				C	G	C	A	A	G	G	G	T	G		C	A	A	G	C	T	C	A	G	C	G		C	A	T	C				G	G	G	A	T	C	C		A
HAP2	IRIS 313-11245	RP 20-12::IRGC 40031-2::[IRIS 313-11245]	IRGC 128151	indx		sd1	SNPseek				C	G	C	A	A	G	G	G	T	G		C	A	A	G	C	T	C	A	G	C	G		C	A	T	C				G	G	G	A	T	C	C		A
HAP2	IRIS 313-11256	ARC 12411::IRGC 41047-2::[IRIS 313-11256]	IRGC 127941	indx			SNPseek				C	G	C	A	A	G	G	G	T	G		C	A	A	G	C	T	C	A	G	C	G		C	A	T	C				G	G	G	A	T	C	C		A
HAP2	IRIS 313-11263	ARC 13919::IRGC 41313-2::[IRIS 313-11263]	IRGC 127953	indx			SNPseek				C	G	C	A	A	G	G	G	T	G		C	A	A	G	C	T	C	A	G	C	G		C	A	T	C				G	G	G	A	T	C	C		A
HAP2	IRIS 313-11266	ARC 14347::IRGC 41517-2::[IRIS 313-11266]	IRGC 127955	indx			SNPseek				C	G	C	A	A	G	G	G	T	G		C	A	A	G	C	T	C	A	G	C	G		C	A	T	C				G	G	G	A	T	C	C		A
HAP2	IRIS 313-11278	ARC 15319::IRGC 42007-1::[IRIS 313-11278]		indx			SNPseek				C	G	C	A	A	G	G	G	T	G		C	A	A	G	C	T	C	A	G	C	G		C	A	T	C				G	G	G	A	T	C	C		A
HAP2	IRIS 313-11280	ARC 15486::IRGC 42055-1::[IRIS 313-11280]	IRGC 135735	indx			SNPseek				C	G	C	A	A	G	G	G	T	G		C	A	A	G	C	T	C	A	G	C	G		C	A	T	C				G	G	G	A	T	C	C		A
HAP2	IRIS 313-11287	ARC 18371::IRGC 42423-2::[IRIS 313-11287]	IRGC 127969	indx			SNPseek				C	G	C	A	A	G	G	G	T	G		C	A	A	G	C	T	C	A	G	C	G		C	A	T	C				G	G	G	A	T	C	C		A
HAP2	IRIS 313-11304	ARC 15163::IRGC 43106-1::[IRIS 313-11304]	IRGC 127158	indx			SNPseek				C	G	C	A	A	G	G	G	T	G		C	A	A	G	C	T	C	A	G	C	G		C	A	T	C				G	G	G	A	T	C	C		A
HAP2	IRIS 313-11307	ARC 15387::IRGC 43175-2::[IRIS 313-11307]	IRGC 127965	indx			SNPseek				C	G	C	A	A	G	G	G	T	G		C	A	A	G	C	T	C	A	G	C	G		C	A	T	C				G	G	G	A	T	C	C		A
HAP2	IRIS 313-11309	ARC 15862::IRGC 43242-1::[IRIS 313-11309]	IRGC 128229	indx			SNPseek				C	G	C	A	A	G	G	G	T	G		C	A	A	G	C	T	C	A	G	C	G		C	A	T	C				G	G	G	A	T	C	C		A
HAP2	IRIS 313-11273	ARC 14860::IRGC 41793-2::[IRIS 313-11273]	IRGC 127962	indx			SNPseek				C	G	C	A	A	G	G	G	T	G		C	A	A	G	C	T	C	A	G	C	G		C	A	T	C				G	G	G	A	T	C	C		A
HAP2	IRIS 313-11345	WAGWAG::IRGC 44802-1::[IRIS 313-11345]	IRGC 127891	indx			SNPseek				C	G	C	A	A	G	G	G	T	G		C	A	A	G	C	T	C	A	G	C	G		C	A	T	C				G	G	G	A	T	C	C		A
HAP2	IRIS 313-11347	WAGWAG RAOIS::IRGC 44805-1::[IRIS 313-11347]	IRGC 127892	indx			SNPseek				C	G	C	A	A	G	G	G	T	G		C	A	A	G	C	T	C	A	G	C	G		C	A	T	C				G	G	G	A	T	C	C		A
HAP2	IRIS 313-11365	LANJALI::IRGC 46236-2::[IRIS 313-11365]	IRGC 128095	indx			SNPseek				C	G	C	A	A	G	G	G	T	G		C	A	A	G	C	T	C	A	G	C	G		C	A	T	C				G	G	G	A	T	C	C		A
HAP2	IRIS 313-11402	SUITE JORA::IRGC 49257-2::[IRIS 313-11402]	IRGC 128174	indx			SNPseek				C	G	C	A	A	G	G	G	T	G		C	A	A	G	C	T	C	A	G	C	G		C	A	T	C				G	G	G	A	T	C	C		A
HAP2	IRIS 313-11423	C 1016-1::IRGC 50368-1::[IRIS 313-11423]	IRGC 127243	indx			SNPseek				C	G	C	A	A	G	G	G	T	G		C	A	A	G	C	T	C	A	G	C	G		C	A	T	C				G	G	G	A	T	C	C		A
HAP2	B032	ROHINI::[B032]	IRGC 136034	ind1B		sd1	SNPseek				C	G	C	A	A	G	G	G	T	G		C	A	A	G	C	T	C	A	G	C	G		C	A	T	C				G	G	G	A	T	C	C		A
HAP2	B063	GUIZHAO 2::[B063]		ind1A		sd1	SNPseek				C	G	C	A	A	G	G	G	T	G		C	A	A	G	C	T	C	A	G	C	G		C	A	T	C				G	G	G	A	T	C	C		A
HAP2	B084	BAWANGBIAN 1::[B084]		admix			SNPseek				C	G	C	A	A	G	G	G	T	G		C	A	A	G	C	T	C	A	G	C	G		C	A	T	C				G	G	G	A	T	C	C		A
HAP2	B088	SAN**QISHILUO::[B088]		indx		sd1	SNPseek				C	G	C	A	A	G	G	G	T	G		C	A	A	G	C	T	C	A	G	C	G		C	A	T	C				G	G	G	A	T	C	C		A
HAP2	B089	QITOUBAIGU3::[B089]		indx			SNPseek				C	G	C	A	A	G	G		T	G		C	A	A	G		T	C	A	G	C	G		C	A		C				G	G	G	A	T	C	C		A
HAP2	B096	JINZHINUO4::[B096]		indx			SNPseek				C	G	C	A	A	G	G	G	T	G		C	A	A	G	C	T	C	A	G	C	G		C	A	T	C				G	G	G	A	T	C	C		A
HAP2	B105	BAOXUAN 21 A::[B105]		indx			SNPseek				C	G	C	A	A	G	G	G	T	G		C	A	A	G		T	C	A	G	C	G		C	A	T	C				G	G	G	A	T	C	C		A
HAP2	B106	WENXIANGNUO::[B106]		indx			SNPseek				C	G	C	A	A	G	G	G	T	G		C	A	A	G	C	T	C	A	G	C	G		C	A	T	C				G	G	G	A	T	C	C		A
HAP2	B131	AIZIZHAN::[B131]		indx			SNPseek				C	G	C	A	A	G	G	G	T	G		C	A	A	G	C	T	C	A	G	C	G		C	A	T	C				G	G	G	A	T	C	C		A
HAP2	B135	HONGGENGHANGU3::[B135]		indx			SNPseek				C	G	C	A	A	G	G	G	T	G		C	A	A	G	C	T	C	A	G	C	G		C	A	T	C				G	G	G	A	T	C	C		A
HAP2	B142	NINGHUI 21::[B142]		admix			SNPseek				C	G	C	A	A	G	G	G	T	G		C	A	A	G	C	T	C	A	G	C	G		C	A	T	C				G	G	G	A	T	C	C		A
HAP2	B143	76--1::[B143]		temp		sd1	SNPseek				C	G	C	A	A	G	G	G	T	G		C	A	A	G	C	T	C	A	G	C	G		C	A	T	C				G	G	G	A	T	C	C		A
HAP2	B224	YOUNIAN::[B224]		ind1A			SNPseek				C	G	C	A	A	G	G	G	T	G		C	A	A	G	C	T	C	A	G	C	G		C	A	T	C				G	G	G	A	T	C	C		A
HAP2	CX119	P59279::[CX119]		indx		sd1	SNPseek				C	G	C	A	A	G	G		T	G		C	A	A	G	C	T	C	A	G	C	G		C	A	T	C				G	G	G	A	T	C	C		A
HAP2	CX145	MINGHUI 63::[CX145]	IRGC 117271	indx		sd1	SNPseek				C	G	C	A	A	G	G	G	T	G		C	A	A	G	C	T	C	A	G	C	G		C	A	T	C				G	G	G	A	T	C	C		A
HAP2	CX146	CO43::[CX146]	IRGC 135871	indx		sd1	SNPseek				C	G	C	A	A	G	G	G	T	G		C	A	A	G	C	T	C	A	G	C	G		C	A	T	C				G	G	G	A	T	C	C		A
HAP2	CX152	CISADANE::[CX152]	IRGC 135866	ind1B			SNPseek				C	G	C	A	A	G	G	G	T	G		C	A	A	G	C	T	C	A	G	C	G		C	A	T	C				G	G	G	A	T	C	C		A
HAP2	CX156	MR84::[CX156]	IRGC 135995	indx		sd1	SNPseek				C	G	C	A	A	G	G	G	T	G		C	A	A	G	C	T	C	A	G	C	G		C	A	T	C				G	G	G	A	T	C	C		A
HAP2	CX160	W1263::[CX160]	IRGC 136066	ind2			SNPseek				C	G	C	A	A	G	G	G	T	G		C	A	A	G	C	T	C	A	G	C	G		C	A	T	C				G	G	G	A	T	C	C		A
HAP2	CX17	YUEXIANGZHAN::[CX17]		indx		sd1	SNPseek				C	G	C	A	A	G	G	G	T	G		C	A	A	G	C	T	C	A	G	C	G		C	A	T	C				G	G	G	A	T	C	C		A
HAP2	CX232	IR55419-04::[CX232]	IRGC 135924	indx			SNPseek					G	C	A	A	G	G		T	G		C	A	A	G	C	T	C	A	G	C	G		C	A	T	C				G	G	G	A	T	C	C		A
HAP2	CX247	IRAT144::[CX247]	IRGC 135942	indx		sd1	SNPseek				C	G	C	A	A	G	G	G	T	G		C	A	A	G	C	T	C	A	G	C	G		C	A	T	C				G	G	G	A	T	C	C		A
HAP2	CX286	C349::[CX286]		admix			SNPseek				C	G	C	A	A	G	G	G	T	G		C	A	A	G	C	T	C	A	G	C	G		C	A	T	C				G	G	G	A	T	C	C		A
HAP2	CX290	DUO 57::[CX290]		ind1B		sd1	SNPseek				C	G	C	A	A	G	G	G	T	G		C	A	A	G	C	T	C	A	G	C	G		C	A	T	C				G	G	G	A	T	C	C		A
HAP2	CX313	R106::[CX313]		indx		sd1	SNPseek				C	G	C	A	A	G	G	G	T	G		C	A	A	G	C	T	C	A	G	C	G		C	A	T	C				G	G	G	A	T	C	C		A
HAP2	CX318	HEIHEAIHUI::[CX318]		indx		sd1	SNPseek				C	G	C	A	A	G	G	G	T	G		C	A	A	G	C	T	C	A	G	C	G		C	A	T	C				G	G	G	A	T	C	C		A
HAP2	CX328	BAOXUAN 21 B::[CX328]		ind1A			SNPseek				C	G	C	A	A	G	G	G	T	G		C	A	A	G	C	T	C	A	G	C	G		C	A	T	C				G	G	G	A	T	C	C		A
HAP2	CX33	SHWE THWE YIN HYV::[CX33]	IRGC 136045	ind1B		sd1	SNPseek				C	G	C	A	A	G	G	G	T	G		C	A	A	G	C	T	C	A	G	C	G		C	A	T	C				G	G	G	A	T	C	C		A
HAP2	CX346	SAGC－4::[CX346]	IRGC 136038	indx		sd1	SNPseek				C	G	C	A	A	G	G	G	T	G		C	A	A	G	C	T	C	A	G	C	G		C	A	T	C				G	G	G	A	T	C	C		A
HAP2	CX389	JINYUAN 85::[CX389]	IRGC 135960	temp			SNPseek				C	G	C	A	A	G	G	G	T	G		C	A	A	G	C	T	C	A	G	C	G		C	A	T	C				G		G	A	T	C	C		A
HAP2	CX392	SARD::[CX392]	IRGC 136043	indx		sd1	SNPseek				C	G	C	A	A	G	G	G	T	G		C	A	A	G	C	T	C	A	G	C	G		C	A	T	C				G	G	G	A	T	C	C		A
HAP2	CX42	IR68552-55-3-2::[CX42]	IRGC 135933	indx			SNPseek				C	G	C	A	A	G	G	G	T	G		C	A	A	G	C	T	C	A	G	C	G		C	A	T	C				G	G	G	A	T	C	C		A
HAP2	CX431	DUOXI 1::[CX431]		indx		sd1	SNPseek				C	G	C	A	A	G	G	G	T	G		C	A	A	G	C	T	C	A	G	C	G		C	A	T	C				G	G	G	A	T	C	C		A
HAP2	CX52	DIANDUN 502::[CX52]	IRGC 135878	indx		sd1	SNPseek				C	G	C	A	A	G	G	G	T	G		C	A	A	G	C	T	C	A	G	C	G		C	A	T	C				G	G	G	A	T	C	C		A
HAP2	CX64	IRAT 352::[CX64]	IRGC 135943	ind3			SNPseek				C	G	C	A	A	G	G	G	T	G		C	A	A	G	C	T	C	A	G	C	G		C	A	T	C				G	G	G	A	T	C	C		A
HAP2	CX73	IR6::[CX73]	IRGC 135927	ind1B		sd1	SNPseek				C	G	C	A	A	G	G	G	T	G		C	A	A	G	C	T	C	A	G	C	G		C	A	T	C				G	G	G	A	T	C	C		A
HAP2	CX75	AT354::[CX75]	IRGC 135832	indx			SNPseek				C	G	C	A	A	G	G	G	T	G		C	A	A	G	C	T	C	A	G	C	G		C	A	T	C				G	G	G	A	T	C	C		A
HAP2	CX83	X22::[CX83]	IRGC 136074	ind1B		sd1	SNPseek				C	G	C	A	A	G	G	G	T	G		C	A	A	G	C	T	C	A	G	C	G		C	A	T	C				G	G	G	A	T	C	C		A
HAP2	CX84	X23::[CX84]	IRGC 136075	indx		sd1	SNPseek				C	G	C	A	A	G	G	G	T	G		C	A	A	G	C	T	C	A	G	C	G		C	A	T	C				G	G	G	A	T	C	C		A
HAP2	CX88	HUANYANGNIAN::[CX88]		ind1A			SNPseek				C	G	C	A	A	G	G	G	T	G		C	A	A	G	C	T	C	A	G	C	G		C	A	T	C				G	G	G	A	T	C	C		A
HAP2	CX97	BUDDA::[CX97]	IRGC 135851	ind1B			SNPseek				C	G	C	A	A	G	G	G	T	G		C	A	A	G	C	T	C	A	G	C	G		C	A	T	C				G	G	G	A	T	C	C		A
HAP2	B231	B231::[B231]		indx			SNPseek				C	G	C	A	A	G	G	G	T	G		C	A	A	G	C	T	C	A	G	C	G		C	A	T	C				G	G	G	A	T	C	C		A
HAP2	IRIS 313-9555	CHUA DAU::IRGC 4785-1::[IRIS 313-9555]	IRGC 120914	indx			SNPseek				C	G	C	A	A	G	G	G	T	G		C	A	A	G	C	T	C	A	G	C	G		C	A	T	C				G	G	G	A	T	C	T/C		A
HAP2	IRIS 313-8603	ARC 12884::IRGC 22417-1::[IRIS 313-8603]	IRGC 126042	indx			SNPseek				C	G	C	G/A	A	G	G	G	T	G		C	A	A	G	C	T	C	A	G	C	G		C	A	T	C				G	G	G	A	T	C	C		A
HAP2	IRIS 313-9922	IRI 339::IRGC 46956-1::[IRIS 313-9922]	IRGC 125778	ind1B		sd1	SNPseek				C	G	C	A	A	G	G	G	T	G		C	A	A	G	C	T	C	A	G	C	G		C	A	T	T/C				G	G	G	A	T	C	C		A
HAP2	IRIS 313-9936	SITHAIYAN KOTTAI SAMBA::IRGC 50155-1::[IRIS 313-9936]	IRGC 126143	ind2			SNPseek				C	G	C	A	A	G	G	G	T	G		C	A	A	G	C	T	C	A	G	C	G		C	A	T	T/C				G	G	G	A	T	C	C		A
HAP2	IRIS 313-9935	MEKENZIE SMALL::IRGC 49895-1::[IRIS 313-9935]	IRGC 126167	ind2			SNPseek				C	G	C	A	A	G	G	G	T	G		C	A	A	G	C	T	C	A	G	C	G		C	A	T	C				G	G	G	A	T	C	C		A
HAP2	IRIS 313-11517	IR 4432-28-5::IRGC 55952-1::[IRIS 313-11517]	IRGC 127438	ind1B		sd1	SNPseek				C	G	C	A	A	G	G	G	T	G		C	A	A	G	C	T	C	A	G	C	G		C	A	T	C				G	G	G	A	C/T	C	C		A
HAP2	IRIS 313-11573	GAO LIANG ZAO::IRGC 59563-1::[IRIS 313-11573]	IRGC 127379	indx			SNPseek				C	G	C	A	A	G	G	G	T	G		C	A	G/A	G	C	T	C	A	G	C	G		C	A	T	C				G	G	G	A	T	C	C		A
HAP2	IRIS 313-11748	GAO JIAO YING GAN ZHAN::IRGC 68053-1::[IRIS 313-11748]	IRGC 127378	indx			SNPseek				C	G	C	A	A	G	G	G	T	G		C	A	A	G	C	T	C	A	G	C	G		C	A		T/C				G	G	G	A	T	C	C		A
HAP2	IRIS 313-11784	MBEIMBEIHUN::IRGC 69730-1::[IRIS 313-11784]	IRGC 127619	ind1B		sd1	SNPseek				C	G	C	A	A	G	G	G	T	G		C	A	A	G	C	T	C	A	G	C	G		C	A	T	C				G	G	G	A	T	C	C		A
HAP2	IRIS 313-12268	MAYATAUNG::IRGC 95957-1::[IRIS 313-12268]	IRGC 127616	indx			SNPseek				C	G	C	G/A	A	G	G	G	T	G		C	A	A	G	C	T	C	A	G	C	G		C	A	T	C				G	G	G	A	T	C	C		A
HAP2	IRIS 313-12308	SAM SI::IRGC 99020-1::[IRIS 313-12308]	IRGC 127782	ind3			SNPseek				C	G	C	G/A	A	G	G	G	T	G		C	A	A	G	C	T	C	A	G	C	G		C	A	T	C				G	G	G	A	T	C	C		A
HAP2	IRIS 313-11078	NON HAI::IRGC 29636-2::[IRIS 313-11078]	IRGC 132359	indx		sd1	SNPseek				C	G	C	A	A	G	G	G	T	G		C	A	A	G	C	T	C	A	G	C	G		C	A	T	C				A/G	G	G	A	T	C	C		A
HAP2	IRIS 313-11302	ARC 14899::IRGC 43016-1::[IRIS 313-11302]	IRGC 127154	indx			SNPseek				C	G	C	A	A	G	G	G	T	G		C	A	A	G	C	T	C	A	G	C	G		C	A	T	C				G	G	G	A	T	C	C		A
HAP2	B082	QIYUEXIAN::[B082]		indx			SNPseek				C	G	C	A	A	G	G	G	T	G		C	A	A	G	C	T	C	A	G	C	G		C	A	T	C				G	G	G	A	T	C	C		A
HAP2	B238	MOMI::[B238]		indx		sd1	SNPseek				C	G	C	A	A	G	G	G	T	G		C	A	A	G	C	T	C	A	G	C	G		C	A	T	C				G	G	G	A	T	T/C	C		A
HAP2	CX155	MADHUKAR::[CX155]	IRGC 135979	ind2			SNPseek				C	G	C	A	A	G	G	G	T	G		C	A	A	G	C	T	C	A	G	C	G		C	G/A	T	C				G	G	G	A	T	C	C		A
HAP2	CX265	MONOLAYA::[CX265]	IRGC 135988	indx			SNPseek				C	G	C	A	A	G	G	G	T	G		C	A	A	T/G	C	T	C	A	G	C	G		C	A	T	C				G	G	G	A	T	C	C		A
HAP2	CX268	ARROZVERMELHO::[CX268]	IRGC 135831	indx		sd1	SNPseek				C	G	C	A	A	G	G	G	T	G		C	A	A	G	C	T	C	A	G	C	G		C	A	T	C				G	G	G	G/A	T	C	C		A
HAP2	CX319	MENGGUANDAMAGU::[CX319]		indx		sd1	SNPseek				C	G	C	G/A	A	G	G	G	T	G		C	A	A	G	C	T	C	A	G	C	G		C	A	T	C				G	G	G	A	T	C	C		A
HAP2	CX48	PT60::[CX48]		indx		sd1	SNPseek				C	G	C	A	A	G	G	G	T	G		C	A	A	T/G	C	T	C	A	G	C	G		C	A	T	C				G	G	G	A	T	C	C		A
HAP2	IRIS 313-10399	IRGA 346-111-2-1F::IRGC 117341-1::[IRIS 313-10399]	IRGC 120992	indx			SNPseek				C	G	C		A	G	G	G	T	G		C	A	A	G	C	T	C	A	G	C	G		C	A	T	C				G	G	G	A	T	C	C		A
HAP2	IRIS 313-8380	SAN CHIAO TSWEN::IRGC 1565-1::[IRIS 313-8380]	IRGC 126123	ind1A			SNPseek				C	G	C	A	A	G	G	G	T	G		C		A	G	C	T	C	A	G	C	G		C	A	T	C				G	G	G	A	T	C	C		A
HAP2	IRIS 313-8437	IRRIBINI::IRGC 49094-1::[IRIS 313-8437]	IRGC 126215	indx			SNPseek				C	G	C	A	A	G	G	G	T	G		C	A	A	G	C	T	C	A	G	C	G		C	A	T	C				G	G	A/G	G/A	T	C	C		A
HAP2	IRIS 313-9017	PING SHAN TA TSWEN KU::IRGC 1563-1::[IRIS 313-9017]	IRGC 126988	indx			SNPseek				C	G	C	A	A	G	G	G	T	G		C	A	A	G	C	T	C	A	G	C	G		C	A	T					G	G	G	A	T	C	C		A
HAP2	IRIS 313-9174	KUSHIARA::IRGC 34709-1::[IRIS 313-9174]	IRGC 125814	ind2			SNPseek				C	G	C	A	A	G	G	G	T	G		C	A	A	G	C	T	C	A	G	C	G		C	A	T					G	G	G	A	T	C	C		A
HAP2	IRIS 313-9325	SADA RUPA::IRGC 77299-1::[IRIS 313-9325]	IRGC 125894	ind1B			SNPseek				C	G	C	A	A	G	G	G	T	G		C	A	A	G	C	T	C	A	G	C	G		C	A	T					G	G	G	A	T	C	C		A
HAP2	IRIS 313-9482	E 2024::IRGC 67958-1::[IRIS 313-9482]	IRGC 125730	ind1B		sd1	SNPseek				C		C	A	A	G	G	G	T	G		C	A	A	G	C	T	C	A	G	C	G		C	A	T	C				G	G	G	A	T	C	C		A
HAP2	IRIS 313-10001	C 662083::IRGC 62101-1::[IRIS 313-10001]	IRGC 125692	ind1B			SNPseek				C	G	C	A	A	G	G	G	T	G		C	A	A	G	C	T	C	A	G	C	G		C	A	T					G	G	G	A	T	C	C		A
HAP2	IRIS 313-10161	BR IRGA 409::IRGC 55915-1::[IRIS 313-10161]	IRGC 125691	ind1B			SNPseek				C	G	C	A	A	G	G	G	T	G		C	A	A	G	C	T	C	A	G	C	G		C	A	T					G	G	G	A	T	C	C		A
HAP2	IRIS 313-9243	MACAN BINUNDOK::IRGC 8245-1::[IRIS 313-9243]	IRGC 126239	indx			SNPseek				C	G	C	A	A	G	G	G	T	G		C	A	A	G	C	T	C	A	G	C	G		C		T	C				G	G	G	A	T	C	C		A
HAP2	IRIS 313-9397	DUDHSWAR 15-141::IRGC 37951-1::[IRIS 313-9397]		ind2			SNPseek				C	G	C	A	A	G	G	G	T	G		C	A	A	G	C	T	C	A	G	C	G		C	A	T	C				G	G	G	A	T	C	C		G/A
HAP2	IRIS 313-9429	RTS 16::IRGC 8235-1::[IRIS 313-9429]	IRGC 126309	indx			SNPseek				C	G	C	A	A	G	G	G	T	G		C	A	A	T/G	C	C/T	C	A	G	C	G		C	A	T	C				G	G	G	A	T	C	C		A
HAP2	IRIS 313-7815	WAS 198-B-3-1-3::C1::[IRIS 313-7815]	IRGC 122287	ind1B		sd1	SNPseek				C	G	C	A	A	G	G	G	T	G		C	A	A	G	C	T	C	A	G	C			C	A	T	C				G	G	G	A	T	C	C		A
HAP2	IRIS 313-12138	YADU BARA::IRGC 86912-1::[IRIS 313-12138]	IRGC 127896	indx			SNPseek				C	G	C	G/A	C/A	G	G	G	T	G		C	A	A	G	C	T	C	A	G	C	G		C	A	T	C				G	G	G	A	T	C	C		A
HAP2	IRIS 313-10513	LUBANG PUTI::IRGC 5429-1::[IRIS 313-10513]	IRGC 127579	indx			SNPseek				C	G	C	A	A	G	G	G	T	G		C	A	A	G	C	T	C	A	G	C			C	A	T	C				G	G	G	A	T	C	C		A
HAP2	IRIS 313-11147	TYB 11::IRGC 33821-2::[IRIS 313-11147]	IRGC 128198	indx			SNPseek				C	G	C	A	A	G	G	G	T	G		C	A	A	G	C	T	C	A	G	C			C	A	T	C				G	G	G	A	T	C	C		A
HAP2	IRIS 313-11200	BR 52-87-1::IRGC 36849-2::[IRIS 313-11200]	IRGC 128002	ind1B			SNPseek				C	G	C	A	A	G	G	G	T			C	A	A	G	C	T	C	A	G	C	G		C	A	T	C				G	G	G	A	T	C	C		A
HAP2	IRIS 313-11220	CHITRAJ 14-134::IRGC 37837-2::[IRIS 313-11220]	IRGC 128015	ind2			SNPseek				C	G	C	A	A	G	G	G	T	G		C	A	A	G	C	T	C	A	G	C	G		C		T	C				G	G	G	A	T	C	C		A
HAP2	B120	HONGWAN 1::[B120]		indx		sd1	SNPseek				C	G	C	A	A	G	G	G	T	G		C	A	A	G	C	T	C	A	G	C	G		C	A						G	G	G	A	T	C	C		A
HAP2	B207	AIHECHI::[B207]		indx			SNPseek				C	G	C	A	A	G	G	G	T	G		C	A	A	G	C	T	C	A	G	C	G		C	A	T					G	G	G	A	T	C	C		A
HAP2	CX19	ZHONG 413::[CX19]		indx		sd1	SNPseek				C	G	C	A	A	G	G	G	T	G		C	A	A	G	C	T	C	A	G	C	G		C	A	T					G	G	G	A	T	C	C		A
HAP2	CX393	HUANGSIZHAN::[CX393]		ind1B		sd1	SNPseek				C	G	C	A	A	G	G	G	T	G		C	A	A	G	C	T	C	A	G	C	G		C	A	T					G	G	G	A	T	C	C		A
HAP2	CX8	CHENGHUI 448::[CX8]		indx		sd1	SNPseek				C	G	C	A	A	G	G	G	T	G		C	A	A	G	C	T	C	A	G	C	G		C	A	T					G	G	G	A	T	C	C		A
HAP2	CX96	AJAYA::[CX96]	IRGC 135824	ind1B			SNPseek				C	G	C	A	A	G	G	G	T	G		C	A	A	G	C	T	C	A	G	C	G		C	A	T					G	G	G	A	T	C	C		A
HAP2	IRIS 313-7769	SALUMPIKIT::IRTP 4777-C1::[IRIS 313-7769]	IRGC 122236	indx			SNPseek				C	G	C	A	A	G	G	G	T	G		C	G/A	A	G	C	T	C	A	G	C	T/G		T/C	A	T	C				G	G	G	A	T	C	C		A
HAP2	CX57	ZHONGCHAO 123::[CX57]		temp		sd1	SNPseek				C	G	C	A	A	G	G	G	T	G		C	A	A	G	C	T	C		G	C	G		C	A	T	C				G	G	G	A	T	T/C	C		A
HAP2	IRIS 313-8405	JIN JUN DAO::IRGC 59710-1::[IRIS 313-8405]	IRGC 125613	indx			SNPseek				C	G	C	A	A	G	G	G	T	G		C	A	A	G	C	T	C	A	G	C	G		C		T					G	G	G	A	T	C	C		A
HAP2	IRIS 313-10417	UPR 1201-1-20-1::IRGC 117357-1::[IRIS 313-10417]	IRGC 126012	ind1B		sd1	SNPseek				C	G	C	A	A	G	G	G	T	G		C	A	A	G	C	T	C	A	G	C	G		C							G	G	G	A	T	C	C		A
HAP2	IRIS 313-9218	KALO CHAKOL::IRGC 77258-1::[IRIS 313-9218]	IRGC 126136	ind2			SNPseek				C	G	C	A	A	G	G	G	T	G		C	A	A	G	C	T	C	A	G	C	G		C		T	C				G	G	G	A	T	C	C		A
HAP2	IRIS 313-10477	RUSTY LATE::IRGC 3506-1::[IRIS 313-10477]	IRGC 128454	indx			SNPseek				C	G	C	A	A	G	G	G	T	G		C	A	A	G	C	T	C	A	G	C	G		C		T					G	G	G	A	T	C	C		A
HAP2	IRIS 313-11139	NWACHI MANINE::IRGC 33531-2::[IRIS 313-11139]	IRGC 128120	indx			SNPseek				C	G	C	A	A	G	G	G	T	G		C	A		G	C	T	C	A	G	C	G		C	A	T	C				G	G	G	A	T	C	C		A
HAP2	IRIS 313-11193	GAHB AWY 2-1::IRGC 36549-2::[IRIS 313-11193]	IRGC 128040	ind3			SNPseek				C	G	C	A	A	G	G	G	T	G		C	A	A	G	C	T	C	A	G	C	G			A	T	C				G	G	G		T	C	C		A
HAP2	IRIS 313-11346	WAGWAG PUTI::IRGC 44804-2::[IRIS 313-11346]	IRGC 132371	ind1B		sd1	SNPseek				C	G	C	A	A	G	G	G	T	G		C	A	A	G	C	T	C	A	G	C	G		C		T					G	G	G	A	T	C	C		A
HAP2	B104	JIABALA::[B104]		ind1A		sd1	SNPseek				C	G	C	A	A	G	G	G	T			C	A	A	G	C	T	C	A	G	C	G		C	A	T					G	G	G	A	T	C	C		A
HAP2	B195	PMS 10B::[B195]	IRGC 136021	indx		sd1	SNPseek				C	G	C	A	A	G	G	G	T	G		C	A	A	G	C	T	C	G/A		C	G		C	A	T					G	G	G	G/A	T	C	C		A
HAP2	CX118	YETUOZAI::[CX118]		indx			SNPseek				C	G	C	A	A	G	G	G	T	G		C	A	A	T/G	C	C/T	C	A	G	C	G		C	A	T					G	G	G	A	T	C	C		A
HAP2	CX387	1088::[CX387]	IRGC 135812	ind1B		sd1	SNPseek				C	G	C	A	A	G	G	G	T	G		C	A	A	G	C		C	A	G	C	G		C	A						G	G	G	A	T	C	C		A
HAP2	CX50	AI ZI DAO::[CX50]		ind1B		sd1	SNPseek				C	G	C	A	A	G	G	G	T	G		C	A	A	G	C	T		A	G	C	G		C		T					G	G	G	A	T	C	C		A
HAP2	IRIS 313-10400	IRGA 370-38-1-1F-C4-2::IRGC 117342-1::[IRIS 313-10400]	IRGC 125988	ind1B		sd1	SNPseek				C	G	C	G/A	A	G	G	G				C	A	A	G	C	T	C	A	G	C	G		C	A	T	C				G	G	G	A	T	C	C		A
HAP2	IRIS 313-10334	B 6136 E-3-TB-0-1-5::IRGC 117311-1::[IRIS 313-10334]	IRGC 125952	ind1B			SNPseek				C	G	C	A	A	G	G	G	T	G		C	A	A	G	C	T	C	A	G					A	T	C				G	G		A	T	C	C		A
HAP2	IRIS 313-8889	LU MAO ZHAN::IRGC 68159-1::[IRIS 313-8889]	IRGC 125829	indx			SNPseek				C	G	C		A	G	G	G	T			C	A	A	G	C	T	C	A	G	C	G		C	A						G	G	G	A	T	C	C		A
HAP2	IRIS 313-7636	ADNY 11::C1::[IRIS 313-7636]	IRGC 126992	ind1B			SNPseek				C	G	C	A		G	G	G	T	G		C	A	A	G	C	T	C	A	G	C	G				T	C				G	G	G	A	T	C	C		A
HAP2	IRIS 313-10731	BARKHE TAULI::IRGC 16116-1::[IRIS 313-10731]	IRGC 127212	ind1A			SNPseek				C	G	C	A	A	G	G	G	T	G		C	A	A	G		T	C		G	C				A	T	C				G	G	G	A	T	C	C		A
HAP2	IRIS 313-11011	SUNAR::IRGC 27470-1::[IRIS 313-11011]	IRGC 127830	indx			SNPseek				C	G	C	A	A	G	G	G	T	G		C	A	A	G	C	T	C		G	C	G		C		T					G	G	G	A	T	C	C		A
HAP2	B201	CHENGNONGSHUIJING::[B201]		ind1B		sd1	SNPseek				C	G	C	A	A	G	G	G	T	G		C	A			C	T	C	A	G	C			C	A	T	C				G	G	G	A	T	C	C		A
HAP2	CX12	HUAGENGXIAN 74::[CX12]	IRGC 135909	indx		sd1	SNPseek				C	G	C	A	A	G	G	G	T	G		C			G	C	T	C	A	G	C			C	A	T	C				G	G	G	A	T	C	C		A
HAP2	CX381	ADNY 11::[CX381]	IRGC 135821	ind1B			SNPseek				C	G	C	A	A	G	G	G	T	G		C	A	A	G	C	T	C	A	G	C	G		C		T					G	G	G	A	T	C	C		A
HAP2	IRIS 313-10401	IRGA 370-42-1-1F-C-1::IRGC 117343-1::[IRIS 313-10401]	IRGC 125989	ind1B		sd1	SNPseek				C	G	C	A	A	G	G	G	T			C	A	A	G	C	T	C		G	C	G		C	A	T	C				G	G			T	C	C		A
HAP2	CX360	Y075::[CX360]		ind1B			SNPseek				C	G	C	A	A	G	G	G	T	G		C		A				C	A	G	C	G		C		T					G	G	G	A	T	C	C		A
HAP2	IRIS 313-11713	ITA 245::IRGC 66288-1::[IRIS 313-11713]	IRGC 127445	ind3			SNPseek				C	G	C	A		G	G	G	T			C	A	A		C		C	A	G	C	G		C		T	C				G	G	G	A		C	C		A
HAP2	CX370	CHENGHUI 727::[CX370]		ind1B		sd1	SNPseek				C	G	C	A	A	G	G	G	T			C	A	A		C	T	C	A	G	C	G									G	G	G	A	T	C	C		A
HAP2	B203	BIWUSHENG::[B203]		indx			SNPseek				C	G	C	A	A	G	G	G	T	G		C				C	T	C	A												G	G	G	A	T	C	C		A
HAP2	IRIS 313-8559	KEERIPALA CHILL PADDY::IRGC 49790-1::[IRIS 313-8559]	IRGC 125615	ind2			SNPseek				C	G	C	A	A	G		G	T	G		C				C	T	C	A	G	C				A	T	C				G	G	G	A	T	C			A
HAP2	IRIS 313-10397	IRGA 318-11-6-9-2B::IRGC 117339-1::[IRIS 313-10397]	IRGC 120991	ind1B			SNPseek				C	G	C	A	A	G	G	G	T	G		C	A	A	G	C	T	C	A	G	C	G		C	A	T	C				G	G	G	A	T	C	C		A
HAP2	B107	DAWANNUO::[B107]		indx			SNPseek				C	G	C	A	A	G	G	G	T	G		C	A	A	G	C	T	C	A	G	C	G		C	A	T	C				G	G	G	A	T	C	C		A
HAP2	IRIS 313-9320	SIPULUT HITAM PENDEK::IRGC 20154-1::[IRIS 313-9320]	IRGC 125901	ind3			SNPseek				C	G	C	A	A	G	G	G	T	G		C	A	A	G	C	T	C	A	G	C	G		C	A	T	C				G	G	G	A	T	C	C		A
HAP2	IRIS 313-11535	PAH DI MI RAHK::IRGC 57398-1::[IRIS 313-11535]	IRGC 132288	ind3			SNPseek				C	G	C	A	A	G	G	G	T	G		C	A	A	G	C	T	C	A	G	C	G		C	A	T	C				G	G	G	A	T	C	C		A
HAP2	IRIS 313-11303	ARC 15097::IRGC 43053-1::[IRIS 313-11303]	IRGC 128228	indx			SNPseek				C	G	C	A	A	G	G	G	T	G		C	A	A	G	C	T	C	A	G	C	G		C	A	T	C				G	G	G	A	T	C	C		A
HAP2	B081	HEIDU 4::[B081]	IRGC 135901	ind1A			SNPseek				C	G	C	A	A	G	G	G	T	G		C	A	A	G	C	T	C	A	G	C	G		C	A	T	C				G	G	G	A	T	C	C		A
HAP2	IRIS 313-9137	ARC 10100::IRGC 20709-1::[IRIS 313-9137]	IRGC 121185	aus			SNPseek				C	G	C	A	A	G	G	G	T	G		C	A	A	G	C	T	C	A	G	C	G		C	A	T	C				G	G	G	A	T	C	C		A
HAP2	IRIS 313-11274	ARC 14901::IRGC 41811-1::[IRIS 313-11274]	IRGC 127155	aus			SNPseek				C	G	C	A	A	G	G	G	T	G		C	A	A	G	C	T	T	A	G	T	G		C	A	T	C				G	G	G	G	T	T	C		A
HAP2	IRIS 313-11143	TANBAUNG::IRGC 33732-2::[IRIS 313-11143]	IRGC 128180	indx			SNPseek				C	G	C	A	A	G	G	G	T	G		C	A	A	G	C	T	C	A	G	C	G		C	A	T					G	G	G	A	T	C	C		A
HAP3
HAP3a	CX225	IR77298-14-1-2::[CX225]	IRGC 135938	ind1B	E_2	sd1	De novo assembled	G	C	C	C	G	C	A	A	G	G	G	T	G	T	C	A	A	G	C	T	C	A	G	C	G	C	C	A	T	C				G	C	G	A	T	C	C		A
HAP3a	CX358	PSBRC82::[CX358]	IRGC 136024	ind1B	E_2		De novo assembled	G	C	C	C	G	C	A	A	G	G	G	T	G	T	C	A	A	G	C	T	C	A	G	C	G	C	C	A	T	C				G	C	G	A	T	C	C		A
HAP3a	CX234	IR62266-42-6-2::[CX234]	IRGC 135928	indx	E_2		De novo assembled	G	C	C	C	G	C	A	A	G	G	G	T	G	T	C	A	A	G	C	T	C	A	G	C	G	C	C	A	T	C				G	C	G	A	T	C	C		A
HAP3a	IRIS 313-11886	IR 4683-54-2::IRGC 72992-1::[IRIS 313-11886]	IRGC 127439	ind1B	A_7		De novo assembled	G	C	C	C	G	C	A	A	G	G	G	T	G	T	C	A	A	G	C	T	C	A	G	C	G	C	C	A	T	C				G	C	G	A	T	C	C		A
HAP3a	CX364	42686::[CX364]		ind1B	E_2	sd1	De novo assembled	G	C	C	C	G	C	A	A	G	G	G	T	G	T	C	A	A	G	C	T	C	A	G	C	G	C	C	A	T	C				G	C	G	A	T	C	C		A
HAP3a	IRIS 313-12067	531::IRGC 82643-1::[IRIS 313-12067]	IRGC 127100	indx	E_2	sd1	De novo assembled	G	C	C	C	G	C	A	A	G	G	G	T	G	T	C	A	A	G	C	T	C	A	G	C	G	C	C	A	T	C				G	C	G	A	T	C	C		A
HAP3a	CX124	IR71466-75-3-B-1::[CX124]	IRGC 135936	indx	E_2		De novo assembled	G	C	C	C	G	C	A	A	G	G	G	T	G	T	C	A	A	G	C	T	C	A	G	C	G	C	C	A	T	C				G	C	G	A	T	C	C		A
HAP3a	B064	XIANGZAOXIAN 7::[B064]		indx	E_2		De novo assembled	G	C	C	C	G	C	A	A	G	G	G	T	G	T	C	A	A	G	C	T	C	A	G	C	G	C	C	A	T	C				G	C	G	A	T	C	C		A
HAP3a	IRIS 313-15896	FEDEARROZ 50::G1::[IRIS 313-15896]	IRGC 126957	ind1B		sd1	SNPseek				C	G	C	A	A	G	G	G	T	G		C	A	A	G	C	T	C	A	G	C	G		C	A	T	C				G	C	G	A	T	C	C		A
HAP3a	IRIS 313-15897	SANHUANGZHAN NO 2::G1::[IRIS 313-15897]	IRGC 126968	indx		sd1	SNPseek				C	G	C	A	A	G	G	G	T	G		C	A	A	G	C	T	C	A	G	C	G		C	A	T	C				G	C	G	A	T	C	C		A
HAP3a	IRIS 313-9351	PARA NELLU::IRGC 50009-1::[IRIS 313-9351]	IRGC 125868	ind2			SNPseek				C	G	C	A	A	G	G	G	T	G		C	A	A	G	C	T	C	A	G	C	G		C	A	T	C				G	C	G	A	T	C	C		A
HAP3a	IRIS 313-10290	ELONI::IRGC 116980-1::[IRIS 313-10290]	IRGC 125963	ind1B		sd1	SNPseek				C	G	C	A	A	G	G	G	T	G		C	A	A	G	C	T	C	A	G	C	G		C	A	T	C				G	C	G	A	T	C	C		A
HAP3a	IRIS 313-8616	IR 5494 (BPH 1)::IRGC 24484-1::[IRIS 313-8616]	IRGC 131939	ind1B		sd1	SNPseek				C	G	C	A	A	G	G	G	T	G		C	A	A	G	C	T	C	A	G	C	G		C	A	T	C				G	C	G	A	T	C	C		A
HAP3a	IRIS 313-9623	PESAGRO 102::IRGC 78703-1::[IRIS 313-9623]	IRGC 126001	indx		sd1	SNPseek				C	G	C	A	A	G	G	G	T	G		C	A	A	G	C	T	C	A	G	C	G		C	A	T	C				G	C	G	A	T	C	C		A
HAP3a	IRIS 313-10046	CHAMA (DWARF)::IRGC 69487-1::[IRIS 313-10046]	IRGC 125958	ind1B		sd1	SNPseek				C	G	C	A	A	G	G	G	T	G		C	A	A	G	C	T	C	A	G	C	G		C	A	T	C				G	C	G	A	T	C	C		A
HAP3a	IRIS 313-10167	IR 13429-109-2-2-1::IRGC 63491-1::[IRIS 313-10167]	IRGC 125773	indx		sd1	SNPseek				C	G	C	A	A	G	G	G	T	G		C	A	A	G	C	T		A	G	C	G		C	A	T	C				G	C	G	A	T	C	C		A
HAP3a	IRIS 313-10237	PSBRC 86::IRGC 99716-1::[IRIS 313-10237]		ind1B			SNPseek				C	G	C	A	A	G	G	G	T	G		C	A	A	G	C	T	C	A	G	C	G		C	A	T	C				G	C	G	A	T	C	C		A
HAP3a	IRIS 313-7832	WAS 63-22-5-9-10-1::C1::[IRIS 313-7832]	IRGC 122297	ind1B		sd1	SNPseek				C	G	C	A	A	G	G	G	T	G		C	A	A	G	C	T	C	A	G	C	G		C	A	T	C				G	C	G	A	T	C	C		A
HAP3a	IRIS 313-7819	WAS 203-B-B-2-4-1::C1::[IRIS 313-7819]	IRGC 122289	ind1B			SNPseek				C	G	C	A	A	G	G	G	T	G		C	A	A	G	C	T	C	A	G	C	G		C	A	T	C				G	C	G	A	T	C	C		A
HAP3a	IRIS 313-7688	IR 22::IRGC 11356-C1::[IRIS 313-7688]	IRGC 122091	ind1B		sd1	SNPseek				C	G	C	A	A	G	G	G	T	G		C	A	A	G	C	T	C	A	G	C	G		C	A	T	C				G	C	G	A	T	C	C		A
HAP3a	IRIS 313-7691	IR 28::IRGC 30411-C1::[IRIS 313-7691]	IRGC 122094	ind1B		sd1	SNPseek				C	G	C	A	A	G	G	G	T	G		C	A	A	G	C	T	C	A	G	C	G		C	A	T	C				G	C	G	A	T	C	C		A
HAP3a	IRIS 313-7826	WAS 33-B-B-15-1-4-5::C1::[IRIS 313-7826]	IRGC 122292	ind1B		sd1	SNPseek				C	G	C	A	A	G	G	G	T	G		C	A	A	G	C	T	C	A	G	C	G		C	A	T	C				G	C	G	A	T	C	C		A
HAP3a	IRIS 313-7689	IR 2307-247-2-2-3::IRGC 77982-C1::[IRIS 313-7689]	IRGC 122092	ind1B		sd1	SNPseek				C	G	C	A	A	G	G	G	T	G		C	A	A	G	C	T	C	A	G	C	G		C	A	T	C				G	C	G	A	T	C	C		A
HAP3a	IRIS 313-7685	IR 19746-28-2-2::IRGC 78072-C1::[IRIS 313-7685]	IRGC 122089	ind1B		sd1	SNPseek				C	G	C	A	A	G	G	G	T	G		C	A	A	G	C	T	C	A	G	C	G		C	A	T	C				G	C	G	A	T	C	C		A
HAP3a	IRIS 313-7824	WAS 21-B-B-20-4-3-3::C1::[IRIS 313-7824]	IRGC 122291	ind1B		sd1	SNPseek				C	G	C	A	A	G	G	G	T	G		C	A	A	G	C	T	C	A	G	C	G		C	A	T	C				G	C	G	A	T	C	C		A
HAP3a	IRIS 313-7766	SAHEL 108::C1::[IRIS 313-7766]	IRGC 122232	ind1B		sd1	SNPseek				C	G	C	A	A	G	G	G	T	G		C	A	A	G	C	T	C	A	G	C	G		C	A	T	C				G	C	G	A	T	C	C		A
HAP3a	IRIS 313-7719	KOGONI 91-1::C1::[IRIS 313-7719]	IRGC 122140	indx		sd1	SNPseek				C	G	C	A	A	G	G	G	T	G		C	A	A	G	C	T	C	A	G	C	G		C	A	T	C				G	C	G	A	T	C	C		A
HAP3a	IRIS 313-11484	EJALI::IRGC 53500-1::[IRIS 313-11484]	IRGC 127357	aus			SNPseek				C	G	C	A	A	G	G	G	T	G		C	A	A	G	C	T	C	A	G	C	G		C	A	T	C				G	C	G	A	T	C	C		A
HAP3a	IRIS 313-11979	IR 19661-364-1-2-3::IRGC 78061-1::[IRIS 313-11979]	IRGC 127435	ind1B		sd1	SNPseek				C	G	C	A	A	G	G	G	T	G		C	A	A	G	C	T	C	A	G	C	G		C	A	T	C				G	C	G	A	T	C	C		A
HAP3a	IRIS 313-12319	PSBRC 18::IRGC 99639-1::[IRIS 313-12319]	IRGC 127743	ind1B		sd1	SNPseek				C	G	C	A	A	G	G	G	T	G		C	A	A	G	C	T	C	A	G	C	G		C	A		C				G	C	G	A	T	C	C		A
HAP3a	IRIS 313-11122	IR 1813-694-2::IRGC 32656-2::[IRIS 313-11122]	IRGC 128059	ind1B			SNPseek				C	G	C	A	A	G	G	G	T	G		C	A	A	G	C	T	C	A	G	C	G		C	A	T	C				G	C	G	A	T	C	C		A
HAP3a	IRIS 313-11325	BLM 70::IRGC 43989-1::[IRIS 313-11325]	IRGC 135739	indx		sd1	SNPseek				C	G	C	A	A	G	G	G	T	G		C	A	A	G	C	T	C	A	G	C	G		C	A	T	C				G	C	G	A	T	C	C		A
HAP3a	IRIS 313-11357	CR 579-1-3::IRGC 45443-2::[IRIS 313-11357]	IRGC 128021	ind1B		sd1	SNPseek				C	G	C	A	A	G	G	G	T	G		C	A	A	G	C	T	C	A	G	C	G		C	A	T	C				G	C	G	A	T	C	C		A
HAP3a	IRIS 313-11385	IR 9747 SEL::IRGC 47695-1::[IRIS 313-11385]	IRGC 127442	indx			SNPseek				C	G	C	A	A	G	G	G	T	G		C	A	A	G	C	T	C	A	G	C	G		C	A	T	C				G	C	G	A	T	C	C		A
HAP3a	B040	K 24::[B040]	IRGC 135962	indx		sd1	SNPseek				C	G	C	A	A	G	G	G	T	G		C	A	A	G	C	T	C	A	G	C	G		C	A	T	C				G	C	G	A	T	C	C		A
HAP3a	CX230	IR64-IL::[CX230]	IRGC 135929	ind1B		sd1	SNPseek				C	G	C	A	A	G	G	G	T	G		C	A	A	G	C	T	C	A	G	C	G		C	A	T	C				G	C	G	A	T	C	C		A
HAP3a	CX281	IR68897B::[CX281]	IRGC 135934	ind1B		sd1	SNPseek				C	G	C	A	A	G	G	G	T	G		C	A	A	G	C	T	C	A	G	C	G		C	A	T	C				G	C	G	A	T	C	C		A
HAP3a	CX357	PSBRC80::[CX357]	IRGC 136023	ind1B		sd1	SNPseek				C	G	C	A	A	G	G	G	T	G		C	A	A	G	C	T	C	A	G	C	G		C	A	T	C				G	C	G	A	T	C	C		A
HAP3a	CX362	YZX1::[CX362]		ind1B		sd1	SNPseek				C	G	C	A	A	G	G	G	T	G		C	A	A	G	C	T	C	A	G	C	G		C	A	T	C				G	C	G	A	T	C	C		A
HAP3a	CX403	IR64A::[CX403]		ind1B		sd1	SNPseek				C	G	C	A	A	G	G	G	T	G		C	A	A	G	C	T	C	A	G	C	G		C	A	T	C				G	C	G	A	T	C	C		A
HAP3a	CX43	IR66897B::[CX43]	IRGC 135931	ind1B		sd1	SNPseek				C	G	C	A	A	G	G	G	T	G		C	A	A	G	C	T	C	A	G	C	G		C	A	T	C				G	C	G	A	T	C	C		A
HAP3a	CX79	CS94::[CX79]	IRGC 135873	ind1B		sd1	SNPseek				C	G	C	A	A	G	G	G	T	G		C	A	A	G	C	T	C	A	G	C	G		C	A	T	C				G	C	G	A	T	C	C		A
HAP3a	CX80	OM1706::[CX80]	IRGC 136014	ind1B		sd1	SNPseek				C	G	C	A	A	G	G	G	T	G		C	A	A	G	C	T	C	A	G	C	G		C	A	T	C				G	C	G	A	T	C	C		A
HAP3a	CX82	X21::[CX82]	IRGC 136073	ind1B			SNPseek				C	G	C	A	A	G	G	G	T	G		C	A	A	G	C	T	C	A	G	C	G		C	A	T	C				G	C	G	A	T	C	C		A
HAP3a	CX85	C71::[CX85]		indx			SNPseek				C	G	C	A	A	G	G	G	T	G		C	A	A	G	C	T	C	A	G	C	G		C	A	T	C				G	C	G	A	T	C	C		A
HAP3a	CX561	CX561::[CX561]		ind1B			SNPseek				C	G	C	A	A	G	G	G	T	G		C	A	A	G	C	T	C	A	G	C	G		C	A	T	C				G	C	G	A	T	C	C		A
HAP3a	IRIS 313-12135	PERUBAK LUEY::IRGC 86436-1::[IRIS 313-12135]	IRGC 127726	ind1B		sd1	SNPseek				C	G	C	A	A	G	G	G	T	G		C	A	A	G	C	T	C	A	G	C	G		C	A	T	C				G	C	G	A	T	C	C		A
HAP3b	IRIS 313-10272	COLOMBIA 1::IRGC 116970-1::[IRIS 313-10272]	IRGC 125714	japx	E_1		De novo assembled	G	C	C	C	G	C	A	A	G	G	G	T	G	T	C	A	A	G	C	T	C	A	G	C	G	C	C	A	T	C				G	G	G	A	T	C	C		A
HAP3b	IRIS 313-11958	PUANG MAHLAI KHAO::IRGC 76959-1::[IRIS 313-11958]		ind3	E_1		De novo assembled	G	C	C	C	G	C	A	A	G	G	G	T	G	T	C	A	A	G	C	T	C	A	G	C	G	C	C	A	T	C				G	G	G	A	T	C	C		A
HAP3b	IRIS 313-11816	KARILETYONE::IRGC 70745-1::[IRIS 313-11816]	IRGC 127493	indx	E_1		De novo assembled	G	C	C	C	G	C	A	A	G	G	G	T	G	T	C	A	A	G	C	T	C	A	G	C	G	C	C	A	T	C				G	G	G	A	T	C	C		A
HAP3b	IRIS 313-8288	AVO::[IRIS 313-8288]	IRGC 117430	indx	E_1		De novo assembled	G	C	C	C	G	C	A	A	G	G	G	T	G	T	C	A	A	G	C	T	C	A	G	C	G	C	C	A	T	C				G	G	G	A	T	C	C		A
HAP3b	IRIS 313-7722	LATSIBOZAKA 112-1::GERVEX 8233-C1::[IRIS 313-7722]	IRGC 127001	admix	E_1		De novo assembled	G	C	C	C	G	C	A	A	G	G	G	T	G	T	C	A	A	G	C	T	C	A	G	C	G	C	C	A	T	C				G	G	G	A	T	C	C		A
HAP3b	IRIS 313-11231	STRAW 23-471::IRGC 38456-1::[IRIS 313-11231]	IRGC 135799	ind2	E_1		De novo assembled	G	C	C	C	G	C	A	A	G	G	G	T	G	T	C	A	A	G	C	T	C	A	G	C	G	C	C	A	T	C				G	G	G	A	T	C	C		A
HAP3b	IRIS 313-10371	IR 67518-B-11-1-B::IRGC 117380-1::[IRIS 313-10371]	IRGC 126026	indx	E_1	sd1	De novo assembled	G	C	C	C	G	C	A	A	G	G	G	T	G	T	C	A	A	G	C	T	C	A	G	C	G	C	C	A	T	C				G	G	G	A	T	C	C		A
HAP3b	IRIS 313-11558	NULI::IRGC 58824-1::[IRIS 313-11558]	IRGC 127684	ind2	E_1		De novo assembled	G	C	C	C	G	C	A	A	G	G	G	T	G	T	C	A	A	G	C	T	C	A	G	C	G	C	C	A	T	C				G	G	G	A	T	C	C		A
HAP3b	IRIS 313-15898	IR 4630-22-2-5-1-3::G1::[IRIS 313-15898]	IRGC 126962	indx	E_1		De novo assembled	G	C	C	C	G	C	A	A	G	G	G	T	G	T	C	A	A	G	C	T	C	A	G	C	G	C	C	A	T	C				G	G	G	A	T	C	C		A
HAP3b	IRIS 313-11410	C 28-16::IRGC 49580-1::[IRIS 313-11410]	IRGC 132393	indx	E_1		De novo assembled	G	C	C	C	G	C	A	A	G	G	G	T	G	T	C	A	A	G	C	T	C	A	G	C	G	C	C	A	T	C				G	G	G	A	T	C	C		A
HAP3b	IRIS 313-8737	SADAJIRA 19-287::IRGC 38320-1::[IRIS 313-8737]	IRGC 126270	ind2	Not assigned		De novo assembled	G	C	C	C	G	C	A	A	G	G	G	T	G	T	C	A	A	G	C	T	C	A	G	C	G	C	C	A	T	C				G	G	G	A	T	C	C		A
HAP3b	IRIS 313-11241	BR 116-3B-53::IRGC 39559-2::[IRIS 313-11241]	IRGC 128001	ind2	Not assigned		De novo assembled	G	C	C	C	G	C	A	A	G	G	G	T	G	T	C	A	A	G	C	T	C	A	G	C	G	C	C	A	T	C				G	G	G	A	T	C	C		A
HAP3b	IRIS 313-11228	SADAJIRA 19-339::IRGC 38361-2::[IRIS 313-11228]	IRGC 128155	ind2	E_1		De novo assembled	G	C	C	C	G	C	A	A	G	G	G	T	G	T	C	A	A	G	C	T	C	A	G	C	G	C	C	A	T	C				G	G	G	A	T	C	C		A
HAP3b	IRIS 313-10550	221 BC 4-1-45-10::IRGC 6865-1::[IRIS 313-10550]	IRGC 135561	indx	E_1		De novo assembled	G	C	C	C	G	C	A	A	G	G	G	T	G	T	C	A	A	G	C	T	C	A	G	C	G	C	C	A	T	C				G	G	G	A	T	C	C		A
HAP3b	CX144	HTA7204::[CX144]	IRGC 135906	indx	E_1		De novo assembled	G	C	C	C	G	C	A	A	G	G	G	T	G	T	C	A	A	G	C	T	C	A	G	C	G	C	C	A	T	C				G	G	G	A	T	C	C		A
HAP3b	B026	PADI LADANG ASE POLO KOMEK::[B026]	IRGC 136017	indx	E_1		De novo assembled	G	C	C	C	G	C	A	A	G	G	G	T	G	T	C	A	A	G	C	T	C	A	G	C	G	C	C	A	T	C				G	G	G	A	T	C	C		A
HAP3b	IRIS 313-7638	ANGIFOTSY 685::GERVEX 4717-C1::[IRIS 313-7638]	IRGC 121963	indx	Not assigned		De novo assembled	G	C	C	C	G	C	A	A	G	G	G	T	G	T	C	A	A	G	C	T	C	A	G	C	G	C	C	A	T	C				G	G	G	A	T	C	C		A
HAP3b	B173	TJANTAJAN::[B173]	IRGC 136056	admix	E_1		De novo assembled	G	C	C	C	G	C	A	A	G	G	G	T	G	T	C	A	A	G	C	T	C	A	G	C	G	C	C	A	T	C				G	G	G	A	T	C	C		A
HAP3b	IRIS 313-11212	KALOBONA::IRGC 37478-2::[IRIS 313-11212]	IRGC 132309	ind2	E_1		De novo assembled	G	C	C	C	G	C	A	A	G	G	G	T	G	T	C	A	A	G	C	T	C	A	G	C	G	C	C	A	T	C				G	G	G	A	T	C	C		A
HAP3b	IRIS 313-12354	NASAENG::IRGC 107818-1::[IRIS 313-12354]	IRGC 127649	indx	E_1		De novo assembled	G	C	C	C	G	C	A	A	G	G	G	T	G	T	C	A	A	G	C	T	C	A	G	C	G	C	C	A	T	C				G	G	G	A	T	C	C		A
HAP3b	IRIS 313-9778	GENIT::IRGC 3272-1::[IRIS 313-9778]	IRGC 125751	admix	E_1		De novo assembled	G	C	C	C	G	C	A	A	G	G	G	T	G	T	C	A	A	G	C	T	C	A	G	C	G	C	C	A	T	C				G	G	G	A	T	C	C		A
HAP3b	CX103	RUBIO::[CX103]	IRGC 136036	admix	E_1		De novo assembled	G	C	C	C	G	C	A	A	G	G	G	T	G	T	C	A	A	G	C	T	C	A	G	C	G	C	C	A	T	C				G	G	G	A	T	C	C		A
HAP3b	IRIS 313-12004	TANALA::IRGC 79467-1::[IRIS 313-12004]	IRGC 132045	admix	E_1		De novo assembled	G	C	C	C	G	C	A	A	G	G	G	T	G	T	C	A	A	G	C	T	C	A	G	C	G	C	C	A	T	C				G	G	G	A	T	C	C		A
HAP3b	IRIS 313-11838	LEUM DERN::IRGC 71288-1::[IRIS 313-11838]	IRGC 132389	ind3	D_1		De novo assembled	G	C	C	C	G	C	A	A	G	G	G	T	G	T	C	A	A	G	C	T	C	A	G	C	G	C	C	A	T	C				G	G	G	A	T	C	C		A
HAP3b	CX363	YZX2::[CX363]		indx			SNPseek				C	G	C	A	A	G	G	G	T	G		C	A	A	G	C	T	C	A	G	C	G		C	A	T	C				G	G/C	G	A	T	C	C		A
HAP3b	IRIS 313-15902	IRRI 146::G1::[IRIS 313-15902]	IRGC 126966	ind1B		sd1	SNPseek				C	G	C	A	A	G	G	G	T	G		C		A	G	C	T	C	A	G	C	G		C	A	T	C				G	C	G	A	T	C	C		A
HAP3b	IRIS 313-9809	NALUMOOLAI KARUPAN::IRGC 8993-1::[IRIS 313-9809]		ind3			SNPseek				C	G	C	A	A	G	G	G	T	G		C	A	A	G	C	T	C	A	G	C	G		C	A	T	C				G	G	G	A	T	C	C		A
HAP3b	IRIS 313-8244	POKKALI::IRGC 8948-1::[IRIS 313-8244]	IRGC 126002	ind2			SNPseek				C	G	C	A	A	G	G	G	T	G		C	A	A	G	C	T	C	A	G	C	G		C	A	T	C				G	G	G	A	T	C	C		A
HAP3b	IRIS 313-8660	KOTTEYARAN::IRGC 47383-1::[IRIS 313-8660]	IRGC 125616	ind2			SNPseek				C	G	C	A	A	G	G	G	T	G		C	A	A	G	C	T	C	A	G	C	G		C	A	T	C				G	G	G	A	T	C	C		A
HAP3b	IRIS 313-9388	VARY MALADY MENA::IRGC 51555-1::[IRIS 313-9388]	IRGC 125931	ind2			SNPseek				C	G	C	A	A	G	G	G	T	G		C	A	A	G	C	T	C	A	G	C	G		C	A	T	C				G	G	G	A	T	C	C		A
HAP3b	IRIS 313-10030	NS 252::IRGC 68878-1::[IRIS 313-10030]	IRGC 121075	ind2			SNPseek				C	G	C	A	A	G	G	G	T	G		C	A	A	G		T	C	A	G	C	G		C	A		C				G	G	G	A	T	C	C		A
HAP3b	IRIS 313-10102	KELIRENY::IRGC 78426-1::[IRIS 313-10102]	IRGC 127056	ind2			SNPseek				C	G	C	A	A	G	G	G	T	G		C	A	A	G	C	T	C	A	G	C	G		C	A	T	C				G	G	G	A	T	C	C		A
HAP3b	IRIS 313-8568	LARHA MUGAD::IRGC 52339-1::[IRIS 313-8568]	IRGC 125619	ind2			SNPseek				C	G	C	A	A	G	G	G	T	G		C	A	A	G	C	T	C	A	G	C	G		C	A	T	C				G	G	G	A	T	C	C		A
HAP3b	IRIS 313-8622	XITTO::IRGC 6671-1::[IRIS 313-8622]	IRGC 126294	ind2			SNPseek				C	G	C	A	A	G	G	G	T	G		C	A	A	G	C	T	C	A	G	C	G		C	A	T	C				G	G	G	A	T	C	C		A
HAP3b	IRIS 313-10289	ARAURE 1::IRGC 116956-1::[IRIS 313-10289]	IRGC 125950	ind1B		sd1	SNPseek				C	G	C	A	A	G	G	G	T	G		C	A	A	G	C	T	C	A	G	C	G		C	A	T	C				G	G	G	A	T	C	C		A
HAP3b	IRIS 313-8631	DUDRE::IRGC 52523-1::[IRIS 313-8631]	IRGC 125608	ind2			SNPseek				C	G	C	A	A	G	G	G	T	G		C	A	A	G	C	T	C	A	G	C	G		C	A	T	C				G	G	G	A	T	C	C		A
HAP3b	IRIS 313-8647	PERUNEL::IRGC 63113-1::[IRIS 313-8647]	IRGC 125621	ind2			SNPseek				C	G	C	A	A	G	G	G	T	G		C	A	A	G	C	T	C	A	G	C	G		C	A	T	C				G	G	G	A	T	C	C		A
HAP3b	IRIS 313-8731	NIBARI::IRGC 67742-1::[IRIS 313-8731]	IRGC 126119	ind2			SNPseek				C	G	C	A	A	G	G	G	T	G		C	A	A	G	C	T	C	A	G	C	G		C	A	T	C				G	G	G	A	T	C	C		A
HAP3b	IRIS 313-8754	TYPE 50::IRGC 74782-1::[IRIS 313-8754]	IRGC 126011	ind2			SNPseek				C	G	C	A	A	G	G	G	T	G		C	A	A	G	C	T	C	A	G	C	G		C	A	T	C				G	G	G	A	T	C	C		A
HAP3b	IRIS 313-8925	KURULUTUDU::IRGC 36304-1::[IRIS 313-8925]	IRGC 125813	ind2			SNPseek				C	G	C	A	A	G	G	G	T	G		C	A	A	G	C	T	C	A	G	C	G		C	A	T	C				G	G	G	A	T	C	C		A
HAP3b	IRIS 313-8930	MUKKALA BAZAL::IRGC 77279-1::[IRIS 313-8930]	IRGC 125844	ind1B			SNPseek				C	G	C	A	A	G	G	G	T	G		C	A	A	G	C	T	C	A	G	C	G		C	A	T	C				G	G	G	A	T	C	C		A
HAP3b	IRIS 313-8988	BANIKAT::IRGC 67720-1::[IRIS 313-8988]	IRGC 125672	ind2			SNPseek				C	G	C	A	A	G	G	G	T	G		C	A	A	G	C	T	C	A	G	C	G		C	A	T	C				G	G	G	A	T	C	C		A
HAP3b	IRIS 313-9019	KAM PAI::IRGC 78245-1::[IRIS 313-9019]	IRGC 126152	ind3			SNPseek				C	G	C	A	A	G	G	G	T	G		C	A	A	G	C	T	C	A	G	C	G		C	A	T	C				G	G	G	A	T	C	C		A
HAP3b	IRIS 313-9020	LEUANG CHAIYAPHUM::IRGC 78266-1::[IRIS 313-9020]	IRGC 126983	ind3			SNPseek				C	G	C	A	A	G	G	G	T	G		C	A	A	G	C	T	C	A	G	C	G		C	A	T	C				G	G	G	A	T	C	C		A
HAP3b	IRIS 313-9121	KHAO LEUANG RAI::IRGC 48168-1::[IRIS 313-9121]	IRGC 125802	ind2			SNPseek				C	G	C	A	A	G	G	G	T	G		C	A	A	G	C	T	C	A	G	C	G		C	A	T	C				G	G	G	A	T	C	C		A
HAP3b	IRIS 313-9148	BADAL 1163::IRGC 32796-1::[IRIS 313-9148]	IRGC 125664	ind2			SNPseek				C	G	C	A	A	G	G	G	T	G		C	A	A	G	C	T	C	A	G	C	G		C	A	T	C				G	G	G	A	T	C	C		A
HAP3b	IRIS 313-9258	MAKRO::IRGC 74763-1::[IRIS 313-9258]	IRGC 126158	ind2			SNPseek				C	G	C	A	A	G	G	G	T	G		C	A	A	G	C	T	C	A	G	C	G		C	A	T	C				G	G	G	A	T	C	C		A
HAP3b	IRIS 313-9313	ARC 10799::IRGC 12631-1::[IRIS 313-9313]	IRGC 125638	indx			SNPseek				C	G	C	A	A	G	G	G	T	G		C	A	A	G	C	T	C	A	G	C	G		C	A	T	C				G	G	G	A	T	C	C		A
HAP3b	IRIS 313-9403	BADUIE::IRGC 53715-1::[IRIS 313-9403]	IRGC 125666	ind2			SNPseek				C	G	C	A	A	G	G	G	T	G		C	A	A	G	C	T	C	A	G	C	G		C	A	T	C				G	G	G	A	T	C	C		A
HAP3b	IRIS 313-9415	PAHK NOK GAEW::IRGC 64572-1::[IRIS 313-9415]		ind3			SNPseek				C	G	C	A	A	G	G	G	T	G		C	A	A	G	C	T	C	A	G	C	G		C	A	T	C				G	G	G	A	T	C	C		A
HAP3b	IRIS 313-9547	LABRA::IRGC 74757-1::[IRIS 313-9547]	IRGC 125817	ind2			SNPseek				C	G	C	A	A	G	G	G	T	G		C	A	A	G	C	T	C	A	G	C	G		C	A	T	C				G	G	G	A	T	C	C		A
HAP3b	IRIS 313-9551	BENGALY MORIMO::IRGC 10976-1::[IRIS 313-9551]	IRGC 125677	ind2			SNPseek				C	G	C	A	A	G	G	G	T	G		C	A	A	G	C	T	C	A	G	C	G		C	A	T	C				G	G	G	A	T	C	C		A
HAP3b	IRIS 313-9567	KHAO CHUAN CHOM 452::IRGC 36571-1::[IRIS 313-9567]	IRGC 131914	ind3			SNPseek				C	G	C	A	A	G	G	G	T	G		C	A	A	G	C	T	C	A	G	C	G		C	A	T	C				G	G	G	A	T	C	C		A
HAP3b	IRIS 313-9604	RPA 5929 (K 45)::IRGC 33963-1::[IRIS 313-9604]	IRGC 125890	indx		sd1	SNPseek				C	G	C	A	A	G	G	G	T	G		C	A	A	G	C	T	C	A	G	C	G		C	A	T	C				G	G	G	A	T	C	C		A
HAP3b	IRIS 313-9617	HOLDI GIRA::IRGC 31801-1::[IRIS 313-9617]	IRGC 126979	ind2			SNPseek				C	G	C	A	A	G	G	G	T	G		C	A	A	G	C	T	C	A	G	C	G		C	A	T	C				G	G	G	A	T	C	C		A
HAP3b	IRIS 313-9709	MAKALIOKA::IRGC 376-1::[IRIS 313-9709]	IRGC 125832	ind2			SNPseek				C	G	C	A	A	G	G	G	T	G		C	A	A	G	C	T	C	A	G	C	G		C	A	T	C				G	G	G	A	T	C	C		A
HAP3b	IRIS 313-9926	TOURBE::IRGC 47066-1::[IRIS 313-9926]	IRGC 126162	indx			SNPseek				C	G	C	A	A	G	G	G	T	G		C	A	A	G	C	T	C	A	G	C	G		C	A	T	C				G	G	G	A	T	C	C		A
HAP3b	IRIS 313-9986	SOM DIGUIME::IRGC 56751-1::[IRIS 313-9986]	IRGC 126168	indx			SNPseek				C	G	C	A	A	G	G	G	T	G		C	A	A	G	C	T	C	A	G	C	G		C	A	T	C				G	G	G	A	T	C	C		A
HAP3b	IRIS 313-10026	KITRANA 1007::IRGC 68517-1::[IRIS 313-10026]	IRGC 125804	ind2			SNPseek				C	G	C	A	A	G	G	G	T	G		C	A	A	G	C	T	C	A	G	C	G		C	A	T	C				G	G	G	A	T	C	C		A
HAP3b	IRIS 313-10234	PSBRC 50::IRGC 99706-1::[IRIS 313-10234]	IRGC 125873	ind1B			SNPseek				C	G	C	A	A	G	G	G	T	G		C	A	A	G	C	T	C	A	G	C	G		C	A	T	C				G	G	G	A	T	C	C		A
HAP3b	IRIS 313-10238	PSBRC 88::IRGC 99717-1::[IRIS 313-10238]	IRGC 125876	ind1B			SNPseek				C	G	C	A	A	G	G	G	T	G		C		A	G	C	T	C	A	G	C	G		C	A	T	C				G	C	G	A	T	C	C		A
HAP3b	IRIS 313-10247	AMISTAD 82::IRGC 116954-1::[IRIS 313-10247]	IRGC 125949	ind1B		sd1	SNPseek				C	G	C	A	A	G	G	G	T	G		C	A	A	G	C	T	C	A	G	C	G		C	A	T	C				G	G	G	A	T	C	C		A
HAP3b	IRIS 313-10361	IR 63295-AC 209-7::IRGC 117365-1::[IRIS 313-10361]	IRGC 127053	indx			SNPseek				C	G	C	A	A	G	G	G	T	G		C	A	A	G	C	T	C	A	G	C	G		C	A	T	C				G	G	G	A	T	C	C		A
HAP3b	IRIS 313-10366	IR 65483-111-5-9-2-11::IRGC 117286-1::[IRIS 313-10366]	IRGC 125976	indx		sd1	SNPseek				C	G	C	A	A	G	G	G	T	G		C	A	A	G	C	T	C	A	G	C	G		C	A	T					G	C	G	A	T	C	C		A
HAP3b	IRIS 313-8530	DHANE BURWA::IRGC 10105-1::[IRIS 313-8530]	IRGC 126199	ind2			SNPseek				C	G	C	A	A	G	G	G	T	G		C	A	A	G	C	T	C	A	G	C	G		C	A	T	C				G	G	G	A	T	C	C		A
HAP3b	IRIS 313-9740	ROJOFOTSY::IRGC 69402-1::[IRIS 313-9740]	IRGC 126083	ind2			SNPseek				C	G	C	A	A	G	G	G	T	G		C	A	A	G	C	T	C	A	G	C	G		C	A	T	C				G	G	G	A	T	C	C		A
HAP3b	IRIS 313-10318	RUSTIC::IRGC 117026-1::[IRIS 313-10318]	IRGC 126085	indx		sd1	SNPseek				C	G	C	A	A	G	G	G	T	G		C	A	A	G	C	T	C	A	G	C	G		C	A	T	C				G	G	G	A	T	C	C		A
HAP3b	IRIS 313-9406	LEUANG SAWED::IRGC 78268-1::[IRIS 313-9406]		ind3			SNPseek				C	G	C	A	A	G	G	G	T	G		C	A	A	G	C	T	C	A	G	C	G		C	A	T	C				G	G	G	A	T	C	C		A
HAP3b	IRIS 313-8739	TAI 6::IRGC 69058-1::[IRIS 313-8739]	IRGC 126090	admix			SNPseek				C	G	C	A	A	G	G	G	T	G		C	A	A	G	C	T	C	A	G	C	G		C	A	T	C				G	G	G	A	T	C	C		A
HAP3b	IRIS 313-7725	MADINIKA 1329::GERVEX 8366-C1::[IRIS 313-7725]	IRGC 124407	ind2			SNPseek				C	G	C	A	A	G	G	G	T	G		C	A	A	G	C	T	C	A	G	C	G		C	A	T	C				G	G	G	A	T	C	C		A
HAP3b	IRIS 313-7684	IR 1561-228-3-3::IRGC 32627-C1::[IRIS 313-7684]	IRGC 122088	indx		sd1	SNPseek				C	G	C	A	A	G	G	G	T	G		C	A	A	G	C	T	C	A	G	C	G		C	A	T					G	C	G	A	T	C	C		A
HAP3b	IRIS 313-7799	VARY LAVA DE MAROVATO::GERVEX 8396-C1::[IRIS 313-7799]	IRGC 124428	ind2			SNPseek				C	G	C	A	A	G	G	G	T	G		C	A	A	G	C	T	C	A	G	C	G		C	A	T	C				G	G	G	A	T	C	C		A
HAP3b	IRIS 313-7793	TSIPALA B 160::GERVEX 8378-C1::[IRIS 313-7793]	IRGC 124426	ind2			SNPseek				C	G	C	A	A	G	G	G	T	G		C	A	A	G	C	T	C	A	G	C	G		C	A	T	C				G	G	G	A	T	C	C		A
HAP3b	IRIS 313-7736	NONA BOKRA::IRGC 22710-C1::[IRIS 313-7736]	IRGC 122181	ind2			SNPseek				C	G	C	A	A	G	G	G	T	G		C	A	A	G	C	T	C	A	G	C	G		C	A	T	C				G	G	G	A	T	C	C		A
HAP3b	IRIS 313-7728	MAMORIAKA 114::GERVEX 5176-C1::[IRIS 313-7728]	IRGC 122159	ind2			SNPseek				C	G	C	A	A	G	G	G	T	G		C	A	A	G	C	T	C	A	G	C	G		C	A	T	C				G	G	G	A	T	C	C		A
HAP3b	IRIS 313-7651	BOTRA MAITSO::GERVEX 8389-C1::[IRIS 313-7651]	IRGC 121990	ind2			SNPseek				C	G	C	A	A	G	G	G	T	G		C	A	A	G	C	T	C	A	G	C	G		C	A	T	C				G	G	G	A	T	C	C		A
HAP3b	IRIS 313-7650	BOTOHAVANA 139::GERVEX 8237-C1::[IRIS 313-7650]	IRGC 124380	ind2			SNPseek				C	G	C	A	A	G	G	G	T	G		C	A	A	G	C	T	C	A	G	C	G		C	A	T	C				G	G	G	A	T	C	C		A
HAP3b	IRIS 313-7646	BETSILAIZINA::GERVEX 8405-C1::[IRIS 313-7646]	IRGC 124378	admix			SNPseek				C	G	C	A	A	G	G	G	T	G		C	A	A	G	C	T	C	A	G	C	G		C	A	T	C				G	G	G	A	T	C	C		A
HAP3b	IRIS 313-7758	ROJOKELY::GERVEX 8410-C1::[IRIS 313-7758]	IRGC 122220	ind2			SNPseek				C	G	C	A	A	G	G	G	T	G		C	A	A	G	C	T	C	A	G	C	G		C	A	T	C				G	G	G	A	T	C	C		A
HAP3b	IRIS 313-7699	IR 57924-24::IRTP 16675-C1::[IRIS 313-7699]	IRGC 122099	indx			SNPseek				C	G	C	A	A	G	G	G	T	G		C	A	A	G	C	T	C	A	G	C	G		C	A	T	C				G	G	G	A	T	C	C		A
HAP3b	IRIS 313-11445	NCS 102::IRGC 51854-1::[IRIS 313-11445]	IRGC 127653	ind2			SNPseek				C	G	C	A	A	G	G	G	T	G		C	A	A	G	C	T	C	A	G	C	G		C	A	T	C				G	G	G	A	T	C	C		A
HAP3b	IRIS 313-11448	BARAMANJ::IRGC 52067-1::[IRIS 313-11448]	IRGC 127209	ind2			SNPseek				C	G	C	A	A	G	G	G	T	G		C	A	A	G	C	T	C	A	G	C	G		C	A	T	C				G	G	G	A	T	C	C		A
HAP3b	IRIS 313-11452	LOCAL BHAT::IRGC 52343-1::[IRIS 313-11452]	IRGC 127571	aus			SNPseek				C	G	C	A	A	G	G	G	T	G		C	A	A	G	C	T	C	A	G	C	G		C	A	T	C				G	G	G	A	T	C	C		A
HAP3b	IRIS 313-11460	SELHI::IRGC 52760-1::[IRIS 313-11460]	IRGC 127792	ind2			SNPseek				C	G	C	A	A	G	G	G	T	G		C	A	A	G	C	T	C	A	G	C	G		C	A	T	C				G	G	G	A	T	C	C		A
HAP3b	IRIS 313-11461	VAIKATHARYAN::IRGC 52805-1::[IRIS 313-11461]	IRGC 127881	ind2			SNPseek				C	G	C	A	A	G	G	G	T	G		C	A	A	G	C	T	C	A	G	C	G		C	A	T	C				G	G	G	A	T	C	C		A
HAP3b	IRIS 313-11489	KALU T 139::IRGC 53670-1::[IRIS 313-11489]	IRGC 127482	aus			SNPseek				C	G	C	A	A	G	G	G	T	G		C	A	A	G	C	T	C	A	G	C	G		C	A	T	C				G	G	G	A	T	C	C		A
HAP3b	IRIS 313-11505	K 1074::IRGC 55017-1::[IRIS 313-11505]	IRGC 127469	ind2			SNPseek				C	G	C	A	A	G	G	G	T	G		C	A	A	G	C	T	C	A	G	C	G		C	A	T	C				G	G	G	A	T	C	C		A
HAP3b	IRIS 313-11547	SHWE SABA::IRGC 58206-1::[IRIS 313-11547]	IRGC 135580	indx			SNPseek				C	G	C	A	A	G	G	G	T	G		C	A	A	G	C	T	C	A	G	C	G		C	A	T	C				G	G	G	A	T	C	C		A
HAP3b	IRIS 313-11561	BANGLA::IRGC 58876-1::[IRIS 313-11561]	IRGC 128238	ind2			SNPseek				C	G	C	A	A	G	G	G	T	G		C	A	A	G	C	T	C	A	G	C	G		C	A	T	C				G	G	G	A	T	C	C		A
HAP3b	IRIS 313-11565	KUSUM KATIKI::IRGC 59099-1::[IRIS 313-11565]	IRGC 127536	ind2			SNPseek				C	G	C	A	A	G	G	G	T	G		C	A	A	G	C	T	C	A	G	C	G		C	A	T	C				G	G	G	A	T	C	C		A
HAP3b	IRIS 313-11607	HOLDIGANTHI::IRGC 61105-1::[IRIS 313-11607]	IRGC 127411	ind2			SNPseek				C	G	C	A	A	G	G	G	T	G		C	A	A	G	C	T	C	A	G	C	G		C	A	T	C				G	G	G	A	T	C	C		A
HAP3b	IRIS 313-11638	NCS 331::IRGC 62247-1::[IRIS 313-11638]	IRGC 127656	ind2			SNPseek				C	G	C	A	A	G	G	G	T	G		C	A	A	G	C	T	C	A	G	C	G		C	A	T	C				G	G	G	A	T	C	C		A
HAP3b	IRIS 313-11642	NCS 599::IRGC 62373-1::[IRIS 313-11642]	IRGC 127661	ind2			SNPseek				C	G	C	A	A	G	G	G	T	G		C	A	A	G	C	T	C	A	G	C	G		C	A	T	C				G	G	G	A	T	C	C		A
HAP3b	IRIS 313-11644	NCS 745::IRGC 62466-1::[IRIS 313-11644]	IRGC 127663	ind2			SNPseek				C	G	C	A	A	G	G	G	T	G		C	A	A	G	C	T	C	A	G	C	G		C	A	T	C				G	G	G	A	T	C	C		A
HAP3b	IRIS 313-11645	NCS 766::IRGC 62478-1::[IRIS 313-11645]	IRGC 127664	ind2			SNPseek				C	G	C	A	A	G	G	G	T	G		C	A	A	G	C	T	C	A	G	C	G		C	A	T	C				G	G	G	A	T	C	C		A
HAP3b	IRIS 313-11646	NCS 771 A::IRGC 62483-1::[IRIS 313-11646]	IRGC 127665	ind2			SNPseek				C	G	C	A	A	G	G	G	T	G		C	A	A	G	C	T	C	A	G	C	G		C	A	T	C				G	G	G	A	T	C	C		A
HAP3b	IRIS 313-11647	NCS 809 A::IRGC 62502-1::[IRIS 313-11647]	IRGC 127666	ind2			SNPseek				C	G	C	A	A	G	G	G	T	G		C	A	A	G	C	T	C	A	G	C	G		C	A	T	C				G	G	G	A	T	C	C		A
HAP3b	IRIS 313-11650	NCS 901 A::IRGC 62568-1::[IRIS 313-11650]	IRGC 127668	ind2			SNPseek				C	G	C	A	A	G	G	G	T	G		C	A	A	G	C	T	C	A	G	C	G		C	A	T	C				G	G	G	A	T	C	C		A
HAP3b	IRIS 313-11663	MARHARORA::IRGC 63511-1::[IRIS 313-11663]	IRGC 128383	admix			SNPseek				C	G	C	A	A	G	G	G	T	G		C	A	A	G	C	T	C	A	G	C	G		C	A	T	C				G	G	G	A	T	C	C		A
HAP3b	IRIS 313-11671	DERAWA::IRGC 64106-1::[IRIS 313-11671]	IRGC 127313	ind2			SNPseek				C	G	C	A	A	G	G	G	T	G		C	A	A	G	C	T	C	A	G	C	G		C	A	T	C				G	G	G	A	T	C	C		A
HAP3b	IRIS 313-11687	SA GAE::IRGC 64613-1::[IRIS 313-11687]	IRGC 132297	ind3			SNPseek				C	G	C	A	A	G	G	G	T	G		C	A	A	G	C	T	C	A	G	C	G		C	A	T	C				G	G	G	A	T	C	C		A
HAP3b	IRIS 313-11708	KHAO YAI GUANG::IRGC 65972-1::[IRIS 313-11708]	IRGC 127518	ind3			SNPseek				C	G	C	A	A	G	G	G	T	G		C	A	A	G	C	T	C	A	G	C	G		C	A	T	C				G	G	G	A	T	C	C		A
HAP3b	IRIS 313-11738	PAUNDRI::IRGC 67527-1::[IRIS 313-11738]	IRGC 127720	ind2			SNPseek				C	G	C	A	A	G	G	G	T	G		C	A	A	G	C	T	C	A	G	C	G		C	A	T	C				G	G	G	A	T	C	C		A
HAP3b	IRIS 313-11741	HERATH BANDA::IRGC 67630-1::[IRIS 313-11741]	IRGC 127407	ind2			SNPseek				C	G	C	A	A	G	G	G	T	G		C	A	A	G	C	T	C	A	G	C	G		C	A	T	C				G	G	G	A	T	C	C		A
HAP3b	IRIS 313-11754	AMBOHIMANDAY::IRGC 68330-1::[IRIS 313-11754]	IRGC 128214	admix			SNPseek				C	G	C	A	A	G	G	G	T	G		C	A	A	G	C	T	C	A	G	C	G		C	A	T	C				G	G	G	A	T	C	C		A
HAP3b	IRIS 313-11760	MENAHARA 505::IRGC 68709-1::[IRIS 313-11760]	IRGC 127623	ind2			SNPseek				C	G	C	A	A	G	G	G	T	G		C	A	A	G	C	T	C	A	G	C	G		C	A	T	C				G	G	G	A	T	C	C		A
HAP3b	IRIS 313-11772	ROJON'NY NTAOLO::IRGC 69410-1::[IRIS 313-11772]	IRGC 128452	ind2			SNPseek				C	G	C	A	A	G	G	G	T	G		C	A	A	G	C	T	C	A	G	C	G		C	A	T	C				G	G	G	A	T	C	C		A
HAP3b	IRIS 313-11707	KHAO SAHKORN::IRGC 65948-1::[IRIS 313-11707]	IRGC 132403	ind3			SNPseek				C	G	C	A	A	G	G	G	T	G		C	A	A	G	C	T	C	A	G	C	G		C	A	T	C				G	G	G	A	T	C	C		A
HAP3b	IRIS 313-11789	SABORAMANDALOAFO::IRGC 69875-1::[IRIS 313-11789]	IRGC 127774	ind2			SNPseek				C	G	C	A	A	G	G	G	T	G		C	A	A	G	C	T	C	A	G	C	G		C	A	T	C				G	G	G	A	T	C	C		A
HAP3b	IRIS 313-11791	VARY LAHY::IRGC 69908-1::[IRIS 313-11791]	IRGC 127885	ind2			SNPseek				C	G	C	A	A	G	G	G	T	G		C	A	A	G	C	T	C	A	G	C	G		C	A	T	C				G	G	G	A	T	C	C		A
HAP3b	IRIS 313-11793	KOMALIOKO::IRGC 69958-1::[IRIS 313-11793]	IRGC 128350	ind2			SNPseek				C	G	C	A	A	G	G	G	T	G		C	A	A	G	C	T	C	A	G	C	G		C	A	T	C				G	G	G	A	T	C	C		A
HAP3b	IRIS 313-11811	MOSHI::IRGC 70648-1::[IRIS 313-11811]	IRGC 127632	ind2			SNPseek				C	G	C	A	A	G	G	G	T	G		C	A	A	G	C	T	C	A	G	C	G		C	A	T	C				G	G	G	A	T	C	C		A
HAP3b	IRIS 313-11821	19::IRGC 70786-1::[IRIS 313-11821]	IRGC 127096	ind2			SNPseek				C	G	C	A	A	G	G	G	T	G		C	A	A	G	C	T	C	A	G	C	G		C	A	T	C				G	G	G	A	T	C	C		A
HAP3b	IRIS 313-11822	BHONDU PAREWA::IRGC 70802-1::[IRIS 313-11822]	IRGC 135738	ind2			SNPseek				C	G	C	A	A	G	G	G	T	G		C	A	A	G	C	T	C	A	G	C	G		C	A	T	C				G	G	G	A	T	C	C		A
HAP3b	IRIS 313-11823	BHU BHUSI::IRGC 70803-1::[IRIS 313-11823]	IRGC 127223	ind2			SNPseek				C	G	C	A	A	G	G	G	T	G		C	A	A	G	C	T	C	A	G	C	G		C	A	T	C				G	G	G	A	T	C	C		A
HAP3b	IRIS 313-11824	DHANIYA PHOOL::IRGC 70811-1::[IRIS 313-11824]	IRGC 127317	ind2			SNPseek				C	G	C	A	A	G	G	G	T	G		C	A	A	G	C	T	C	A	G	C	G		C	A	T	C				G	G	G	A	T	C	C		A
HAP3b	IRIS 313-11827	KARI GURMATIA::IRGC 70850-1::[IRIS 313-11827]		ind2			SNPseek				C	G	C	A	A	G	G	G	T	G		C	A	A	G	C	T	C	A	G	C	G		C	A	T	C				G	G	G	A	T	C	C		A
HAP3b	IRIS 313-11828	LALI GURMATIA::IRGC 70854-1::[IRIS 313-11828]	IRGC 127544	ind2			SNPseek				C	G	C	A	A	G	G	G	T	G		C	A	A	G	C	T	C	A	G	C	G		C	A	T	C				G	G	G	A	T	C	C		A
HAP3b	IRIS 313-11836	KHAO KO RAOH::IRGC 71208-1::[IRIS 313-11836]	IRGC 132000	ind3			SNPseek				C	G	C	A	A	G	G	G	T	G		C	A	A	G	C	T	C	A	G	C	G		C	A	T	C				G	G	G	A	T	C	C		A
HAP3b	IRIS 313-11839	MUAY::IRGC 71318-1::[IRIS 313-11839]	IRGC 127637	ind3			SNPseek				C	G	C	A	A	G	G	G	T	G		C	A	A	G	C	T	C	A	G	C	G		C	A	T	C				G	G	G	A	T	C	C		A
HAP3b	IRIS 313-11841	NIAW NARAI::IRGC 71353-1::[IRIS 313-11841]	IRGC 127679	ind3			SNPseek				C	G	C	A	A	G	G	G	T	G		C	A	A	G	C	T	C	A	G	C	G		C	A	T	C				G	G	G	A	T	C	C		A
HAP3b	IRIS 313-11895	BA TUC RAN::IRGC 73239-1::[IRIS 313-11895]	IRGC 132391	ind3			SNPseek				C	G	C	A	A	G	G	G	T	G		C	A	A	G	C	T	C	A	G	C	G		C	A		C				G	G	G	A	T	C	C		A
HAP3b	IRIS 313-11916	MUDALIGA WEE::IRGC 74706-1::[IRIS 313-11916]	IRGC 128395	ind2			SNPseek				C	G	C	A	A	G	G	G	T	G		C	A	A	G	C	T	C	A	G	C	G		C	A	T	C				G	G	G	A	T	C	C		A
HAP3b	IRIS 313-11919	LAKHA KUAR::IRGC 74760-1::[IRIS 313-11919]	IRGC 127542	ind2			SNPseek				C	G	C	A	A	G	G	G	T	G		C	A	A	G	C	T	C	A	G	C	G		C	A	T	C				G	G	G	A	T	C	C		A
HAP3b	IRIS 313-11960	PORONG::IRGC 76983-1::[IRIS 313-11960]	IRGC 127740	ind1B		sd1	SNPseek				C	G	C	A	A	G	G	G	T	G		C	A	A	G	C	T	C	A	G	C	G		C	A	T					G	C	G	A	T	C	C		A
HAP3b	IRIS 313-11962	KHAO SETTI::IRGC 77084-1::[IRIS 313-11962]	IRGC 132002	ind3			SNPseek				C	G	C	A	A	G	G	G	T	G		C	A	A	G	C	T	C	A	G	C	G		C	A	T	C				G	G	G	A	T	C	C		A
HAP3b	IRIS 313-11964	VUOTTA SAIL::IRGC 77306-1::[IRIS 313-11964]	IRGC 127888	ind2			SNPseek				C	G	C	A	A	G	G	G	T	G		C	A	A	G	C	T	C	A	G	C	G		C	A	T	C				G	G	G	A	T	C	C		A
HAP3b	IRIS 313-12065	YERI BUTUKA::IRGC 82591-1::[IRIS 313-12065]	IRGC 127903	admix			SNPseek				C	G	C	A	A	G	G	G	T	G		C	A	A	G	C	T	C	A	G	C	G		C	A	T	C				G	G	G	A	T	C	C		A
HAP3b	IRIS 313-12082	MAVOLATSIKA::IRGC 83137-1::[IRIS 313-12082]	IRGC 127614	ind2			SNPseek				C	G	C	A	A	G	G	G	T	G		C	A	A	G	C	T	C	A	G	C	G		C	A	T	C				G	G	G	A	T	C	C		A
HAP3b	IRIS 313-12118	OVIBENAMPOTAKA + OVIBE + MAKALIOKA::IRGC 84756-1::[IRIS 313-12118]	IRGC 127691	ind2			SNPseek				C	G	C	A	A	G	G	G	T	G		C	A	A	G	C	T	C	A	G	C	G		C	A	T	C				G	G	G	A	T	C	C		A
HAP3b	IRIS 313-12143	SRAU KHGNAERNG::IRGC 87073-1::[IRIS 313-12143]	IRGC 132300	ind3			SNPseek				C	G	C	A	A	G	G	G	T	G		C	A	A	G	C	T	C	A	G	C	G		C	A	T	C				G	G	G	A	T	C	C		A
HAP3b	IRIS 313-12152	DAMM NOEB THNGORN'::IRGC 87428-1::[IRIS 313-12152]	IRGC 132398	ind3			SNPseek				C	G	C	A	A	G	G	G	T	G		C	A	A	G	C	T	C	A	G	C	G		C	A		C				G	G	G	A	T	C	C		A
HAP3b	IRIS 313-12251	RUS RUSSEI::IRGC 94341-1::[IRIS 313-12251]	IRGC 127772	ind3			SNPseek				C	G	C	A	A	G	G	G	T	G		C	A	A	G	C	T	C	A	G	C	G		C	A	T	C				G	G	G	A	T	C	C		A
HAP3b	IRIS 313-12282	TSY MILA RO::IRGC 97233-1::[IRIS 313-12282]	IRGC 132302	indx			SNPseek				C	G	C	A	A	G	G	G	T	G		C	A	A	G	C	T	C	A	G	C	G		C	A	T	C				G	G	G	A	T	C	C		A
HAP3b	IRIS 313-12283	VARY 5000 FOTSY::IRGC 97235-1::[IRIS 313-12283]	IRGC 127884	indx			SNPseek				C	G	C	A	A	G	G	G	T	G		C	A	A	G	C	T	C	A	G	C	G		C	A	T	C				G	G	G	A	T	C	C		A
HAP3b	IRIS 313-12284	VARY GONY::IRGC 97308-2::[IRIS 313-12284]	IRGC 128200	ind2			SNPseek				C	G	C	A	A	G	G	G	T	G		C	A	A	G	C	T	C	A	G	C	G		C	A	T	C				G	G	G	A	T	C	C		A
HAP3b	IRIS 313-10519	ADT 22::IRGC 5901-1::[IRIS 313-10519]	IRGC 135733	ind2			SNPseek				C	G	C	A	A	G	G	G	T	G		C	A	A	G	C	T	C	A	G	C	G		C	A	T	C				G	G	G	A	T	C	C		A
HAP3b	IRIS 313-10544	DONGREM::IRGC 6688-1::[IRIS 313-10544]	IRGC 127340	ind2			SNPseek				C	G	C	A	A	G	G	G	T	G		C	A	A	G	C	T	C	A	G	C	G		C	A	T	C				G	G	G	A	T	C	C		A
HAP3b	IRIS 313-10556	LUA DEN MUA::IRGC 7185-1::[IRIS 313-10556]	IRGC 135770	ind3			SNPseek				C	G	C	A	A	G	G	G	T	G		C	A	A	G	C	T	C	A	G	C	G		C	A	T	C				G	G	G	A	T	C	C		A
HAP3b	IRIS 313-10566	221 C 391-1-3-3::IRGC 7600-1::[IRIS 313-10566]	IRGC 127099	indx			SNPseek				C	G	C	A	A	G	G	G	T	G		C	A	A	G	C	T	C	A	G	C	G		C	A	T	C				G	G	G	A	T	C	C		A
HAP3b	IRIS 313-10628	O. SATIVA::IRGC 10164-2::[IRIS 313-10628]	IRGC 132361	ind2			SNPseek				C	G	C	A	A	G	G	G	T	G		C	A	A	G	C	T	C	A	G	C	G		C	A	T	C				G	G	G	A	T	C	C		A
HAP3b	IRIS 313-10661	SAMBA::IRGC 11993-1::[IRIS 313-10661]	IRGC 127781	ind2			SNPseek				C	G	C	A	A	G	G	G	T	G		C	A	A	G	C	T	C	A	G	C	G		C	A	T	C				G	G	G	A	T	C	C		A
HAP3b	IRIS 313-10664	ARC 6052::IRGC 12196-1::[IRIS 313-10664]	IRGC 127163	ind2			SNPseek				C	G	C	A	A	G	G	G	T	G		C	A	A	G	C	T	C	A	G	C	G		C	A	T	C				G	G	G	A	T	C	C		A
HAP3b	IRIS 313-10668	ARC 7255::IRGC 12343-2::[IRIS 313-10668]	IRGC 127974	indx			SNPseek				C	G	C	A	A	G	G	G	T	G		C	A	A	G	C	T	C	A	G	C	G		C	A	T	C				G	G	G	A	T	C	C		A
HAP3b	IRIS 313-10716	MURUNGA::IRGC 15428-1::[IRIS 313-10716]	IRGC 127640	ind2			SNPseek				C	G	C	A	A	G	G	G	T	G		C	A	A	G	C	T	C	A	G	C	G		C	A	T	C				G	G	G	A	T	C	C		A
HAP3b	IRIS 313-10833	EDAKKADAN 0-69-27::IRGC 19560-1::[IRIS 313-10833]	IRGC 127355	ind2			SNPseek				C	G	C	A	A	G	G	G	T	G		C	A	A	G	C	T	C	A	G	C	G		C	A	T	C				G	G	G	A	T	C	C		A
HAP3b	IRIS 313-10835	PERUNEL 0-69-18::IRGC 19581-1::[IRIS 313-10835]	IRGC 127727	ind2			SNPseek				C	G	C	A	A	G	G	G	T	G		C	A	A	G	C	T	C	A	G	C	G		C	A	T	C				G	G	G	A	T	C	C		A
HAP3b	IRIS 313-10836	VELLA PERUVAZHA 0-68-12::IRGC 19588-1::[IRIS 313-10836]	IRGC 127887	ind2			SNPseek				C	G	C	A	A	G	G	G	T	G		C	A	A	G	C	T	C	A	G	C	G		C	A	T	C				G	G	G	A	T	C	C		A
HAP3b	IRIS 313-10858	ARC 10894::IRGC 21122-1::[IRIS 313-10858]	IRGC 127131	indx			SNPseek				C	G	C	A	A	G	G	G	T	G		C	A	A	G	C	T	C	A	G	C	G		C	A	T	C				G	G	G	A	T	C	C		A
HAP3b	IRIS 313-10863	ARC 11322::IRGC 21315-2::[IRIS 313-10863]	IRGC 127937	ind2			SNPseek				C	G	C	A	A	G	G	G	T	G		C	A	A	G	C	T	C	A	G	C	G		C	A	T	C				G	G	G	A	T	C	C		A
HAP3b	IRIS 313-10905	KUOL DAUN THNONG::IRGC 22986-1::[IRIS 313-10905]		ind3			SNPseek				C	G	C	A	A	G	G	G	T	G		C	A	A	G	C	T	C	A	G	C	G		C	A	T	C				G	G	G	A	T	C	C		A
HAP3b	IRIS 313-10929	KOLONGI BAO::IRGC 24135-2::[IRIS 313-10929]	IRGC 128090	ind2			SNPseek				C	G	C	A	A	G	G	G	T	G		C	A	A	G	C	T	C	A	G	C	G		C	A	T	C				G	G	G	A	T	C	C		A
HAP3b	IRIS 313-10983	BOROJYOT::IRGC 26578-2::[IRIS 313-10983]	IRGC 128000	indx			SNPseek				C	G	C	A	A	G	G	G	T	G		C	A	A	G	C	T	C	A	G	C	G		C	A	T	C				G	G	G	A	T	C	C		A
HAP3b	IRIS 313-10984	DUDHSAR::IRGC 26609-2::[IRIS 313-10984]	IRGC 128034	ind2			SNPseek				C	G	C	A	A	G	G	G	T	G		C	A	A	G	C	T	C	A	G	C	G		C	A	T	C				G	G	G	A	T	C	C		A
HAP3b	IRIS 313-10986	HALDI JAON::IRGC 26638-2::[IRIS 313-10986]	IRGC 128048	ind2			SNPseek				C	G	C	A	A	G	G	G	T	G		C	A	A	G	C	T	C	A	G	C	G		C	A	T	C				G	G	G	A	T	C	C		A
HAP3b	IRIS 313-11041	POONGAR::IRGC 28611-1::[IRIS 313-11041]	IRGC 127738	ind2			SNPseek				C	G	C	A	A	G	G	G	T	G		C	A	A	G	C	T	C	A	G	C	G		C	A	T	C				G	G	G	A	T	C	C		A
HAP3b	IRIS 313-11113	KAL SHULI::IRGC 31665-2::[IRIS 313-11113]	IRGC 128069	ind2			SNPseek				C	G	C	A	A	G	G	G	T	G		C	A	A	G	C	T	C	A	G	C	G		C	A	T	C				G	G	G	A	T	C	C		A
HAP3b	IRIS 313-11087	PONG SANG A::IRGC 29881-2::[IRIS 313-11087]		ind3			SNPseek				C	G	C	A	A	G	G	G	T	G		C	A	A	G	C	T	C	A	G	C	G		C	A	T	C				G	G	G	A	T	C	C		A
HAP3b	IRIS 313-11205	KAZALSAIL::IRGC 37161-2::[IRIS 313-11205]	IRGC 128075	ind2			SNPseek				C	G	C	A	A	G	G	G	T	G		C	A	A	G	C	T	C	A	G	C	G		C	A	T	C				G	G	G	A	T	C	C		A
HAP3b	IRIS 313-11209	VADAI::IRGC 37341-1::[IRIS 313-11209]	IRGC 135806	ind2			SNPseek				C	G	C	A	A	G	G	G	T	G		C	A	A	G	C	T	C	A	G	C	G		C	A	T	C				G	G	G	A	T	C	C		A
HAP3b	IRIS 313-11211	KADAMSAIL::IRGC 37468-2::[IRIS 313-11211]	IRGC 128063	ind2			SNPseek				C	G	C	A	A	G	G	G	T	G		C	A	A	G	C	T	C	A	G	C	G		C	A	T	C				G	G	G	A	T	C	C		A
HAP3b	IRIS 313-11247	RP 1153-20-14::IRGC 40131-2::[IRIS 313-11247]	IRGC 132431	indx			SNPseek				C	G	C	A	A	G	G	G	T	G		C	A	A	G	C	T	C	A	G	C	G		C	A	T	C				G	G	G	A	T	C	C		A
HAP3b	IRIS 313-11251	IR 4500-5-1-1::IRGC 40552-2::[IRIS 313-11251]	IRGC 132340	ind1B		sd1	SNPseek				C	G	C	A	A	G	G	G	T	G		C	A	A	G	C	T	C	A	G	C	G		C	A	T	C				G	G	G	A	T	C	C		A
HAP3b	IRIS 313-11262	ARC 13888::IRGC 41288-2::[IRIS 313-11262]	IRGC 127952	indx			SNPseek				C	G	C	A	A	G	G	G	T	G		C	A	A	G	C	T	C	A	G	C	G		C	A	T	C				G	G	G	A	T	C	C		A
HAP3b	IRIS 313-11300	ARC 14709::IRGC 42976-2::[IRIS 313-11300]	IRGC 127960	ind2			SNPseek				C	G	C	A	A	G	G	G	T	G		C	A	A	G	C	T	C	A	G	C	G		C	A	T	C				G	G	G	A	T	C	C		A
HAP3b	IRIS 313-11301	ARC 14868::IRGC 43009-2::[IRIS 313-11301]	IRGC 127963	ind2			SNPseek				C	G	C	A	A	G	G	G	T	G		C	A	A	G	C	T	C	A	G	C	G		C	A	T	C				G	G	G	A	T	C	C		A
HAP3b	IRIS 313-11349	BACHHAIKALMA::IRGC 45003-2::[IRIS 313-11349]	IRGC 127980	ind2			SNPseek				C	G	C	A	A	G	G	G	T	G		C	A	A	G	C	T	C	A	G	C	G		C	A	T	C				G	G	G	A	T	C	C		A
HAP3b	IRIS 313-11351	BANCHI::IRGC 45055-2::[IRIS 313-11351]	IRGC 127986	ind2			SNPseek				C	G	C	A	A	G	G	G	T	G		C	A	A	G	C	T	C	A	G	C	G		C	A	T	C				G	G	G	A	T	C	C		A
HAP3b	IRIS 313-11358	DADKHANI::IRGC 45454-2::[IRIS 313-11358]	IRGC 128023	ind2			SNPseek				C	G	C	A	A	G	G	G	T	G		C	A	A	G	C	T	C	A	G	C	G		C	A	T	C				G	G	G	A	T	C	C		A
HAP3b	IRIS 313-11367	MAKARANDASAIL::IRGC 46289-2::[IRIS 313-11367]	IRGC 128103	ind2			SNPseek				C	G	C	A	A	G	G	G	T	G		C	A	A	G	C	T	C	A	G	C	G		C	A	T	C				G	G	G	A	T	C	C		A
HAP3b	IRIS 313-11369	RANACHANDRABHOG::IRGC 46567-2::[IRIS 313-11369]	IRGC 128146	ind2			SNPseek				C	G	C	A	A	G	G	G	T	G		C	A	A	G	C	T	C	A	G		G		C	A	T	C				G	G	G	A	T	C	C		A
HAP3b	IRIS 313-11370	SACHI::IRGC 46612-2::[IRIS 313-11370]	IRGC 132368	ind2			SNPseek				C	G	C	A	A	G	G	G	T	G		C	A	A	G	C	T	C	A	G	C	G		C	A	T	C				G	G	G	A	T	C	C		A
HAP3b	IRIS 313-11414	KARUNJEERAGA SAMBA::IRGC 49774-1::[IRIS 313-11414]	IRGC 127495	indx			SNPseek				C	G	C	A	A	G	G	G	T	G		C	A	A	G	C	T	C	A	G	C	G		C	A	T	C				G	G	G	A	T	C	C		A
HAP3b	IRIS 313-11420	PISINI::IRGC 50035-2::[IRIS 313-11420]	IRGC 128138	ind2			SNPseek				C	G	C	A	A	G	G	G	T	G		C	A	A	G	C	T	C	A	G	C	G		C	A	T	C				G	G	G	A	T	C	C		A
HAP3b	B011	CO 22::[B011]	IRGC 135870	indx			SNPseek				C	G	C	A	A	G	G	G	T	G		C	A	A	G	C	T	C	A	G	C	G		C	A	T	C				G	G	G	A	T	C	C		A
HAP3b	B031	NGATSIN::[B031]	IRGC 136007	ind2			SNPseek				C	G	C	A	A	G	G	G	T	G		C	A	A	G	C	T	C	A	G	C	G		C	A	T	C				G	G	G	A	T	C	C		A
HAP3b	B048	CISOKAN::[B048]	IRGC 135868	ind1B			SNPseek				C	G	C	A	A	G	G	G	T	G		C	A	A	G	C	T	C	A	G	C	G		C	A	T	C				G	C	G	G/A	T	C	C		A
HAP3b	B176	BRC 25-146-2-1::[B176]	IRGC 135850	indx			SNPseek				C	G	C	A	A	G	G	G	T	G		C	A	A	G	C	T	C	A	G	C	G		C	A	T	C				G	G	G	A	T	C	C		A
HAP3b	CX121	GUANG122::[CX121]		ind1B		sd1	SNPseek				C	G	C	A	A	G	G	G	T	G		C	A	A	G	C	T	C	A	G	C	G		C	A	T					G	C	G	A	T	C	C		A
HAP3b	CX130	CHIPDA::[CX130]	IRGC 135864	ind2			SNPseek				C	G	C	A	A	G	G	G	T	G		C	A	A	G	C	T	C	A	G	C	G		C	A	T	C				G	G	G	A	T	C	C		A
HAP3b	CX226	IR06G113::[CX226]	IRGC 135916	ind1B		sd1	SNPseek				C	G	C	A	A	G	G	G	T	G		C	A	A	G	C	T	C	A	G	C	G		C	A	T					G	C	G	A	T	C	C		A
HAP3b	CX24	TKM 9::[CX24]	IRGC 136058	indx		sd1	SNPseek				C	G	C	A	A	G	G	G	T	G		C	A	A	G	C	T	C	A	G	C	G		C	A	T	C				G	G	G	A	T	C	C		A
HAP3b	CX26	AMOL3(SANA)::[CX26]		ind1B			SNPseek				C	G	C	A	A	G	G	G	T	G		C	A	A	G	C		C	A	G	C	G		C	A	T	C				G	C	G	A	T	C	C		A
HAP3b	CX276	IR8192-200-3-3-1-1::[CX276]	IRGC 135939	ind1B		sd1	SNPseek				C	G	C	A	A	G	G	G	T	G		C	A	A	G	C	T	C	A	G	C	G		C	A	T	C				G	C	G	A	T	C	C		G/A
HAP3b	CX37	OM997::[CX37]	IRGC 136015	ind1B		sd1	SNPseek				C	G	C	A	A	G	G	G	T	G		C	A	A	G	C	T	C		G	C	G		C	A	T	C				G	C	G	A	T	C	C		A
HAP3b	CX399	MATATAG2::[CX399]	IRGC 135982	ind1B		sd1	SNPseek				C	G	C	A	A	G	G	G	T	G		C	A	A	G	C	T	C	A	G	C	G		C	A	T	C				G	G	G	A	T	C	C		A
HAP3b	CX98	DODDABYRANELLA::[CX98]	IRGC 135882	ind2			SNPseek				C	G	C	A	A	G	G	G	T	G		C	A	A	G	C	T	C	A	G	C	G		C	A	T	C				G	G	G	A	T	C	C		A
HAP3b	CX99	DODDI::[CX99]	IRGC 135883	ind2			SNPseek				C	G	C	A	A	G	G	G	T	G		C	A	A	G	C	T	C	A	G	C	G		C	A	T	C				G	G	G	A	T	C	C		A
HAP3b	IRIS 313-15901	IR 77298-14-1-2-10::G1::[IRIS 313-15901]	IRGC 126964	ind1B		sd1	SNPseek				C	G	C	G/A	A	G	G	G	T	G		C	A	A	T/G	C	T	C	A	G	C	G		C	A	T	C				G	C	G	A	T	C	C		A
HAP3b	IRIS 313-8957	BAM 9::IRGC 6179-1::[IRIS 313-8957]	IRGC 125670	ind2			SNPseek				C	G	C	G/A	A	G	G	G	T	G		C	A	A	G	C	T	C	A	G	C	G		C	A	T	C				G	G	G	A	T	C	C		A
HAP3b	IRIS 313-9970	RACE PERUMAL::IRGC 55347-1::[IRIS 313-9970]	IRGC 125881	ind2			SNPseek				C	G	C	A	A	G	G	G	T	G		C	A	A	G	C	T	C	A	G	C	G		C	A	T	C				G	G	G	G/A	T	C	C		A
HAP3b	IRIS 313-10114	FACAGRO 64::IRGC 82059-1::[IRIS 313-10114]	IRGC 125739	ind2			SNPseek				C	G	C	A	A	G	G	G	T	G		C	A	A	G	C	T	C	A	G	C	G		C	G/A	T	C				G	G	G	A	T	C	C		A
HAP3b	IRIS 313-8595	MAKALIOKA STANDARD::IRGC 12768-1::[IRIS 313-8595]	IRGC 126240	ind2			SNPseek				C	G	C	A	A	G	G	G	T	G		C	A	A	G	C	T	C	A	G	C	G		T/C	A	T	C				G	G	G	A	T	C	C		A
HAP3b	IRIS 313-9049	PATNAI 31-675::IRGC 38145-1::[IRIS 313-9049]		ind2			SNPseek				C	G	C	G/A	A	G	G	G	T	G		C	A	A	G	C	T	C	A	G	C	G		C	A	T	C				G	G	G	A	T	C	C		A
HAP3b	IRIS 313-7690	IR 2344-P1 PB-9-3-2B::IRGC 39317-C1::[IRIS 313-7690]	IRGC 122093	indx			SNPseek				C	G	C	A	A	G	G	G	T	G		C	A	A	G	C	T	C	A	G	C			C	A	T	C				G	G/C	G	A	T	C	C		A
HAP3b	IRIS 313-11446	NAPDAI::IRGC 52009-1::[IRIS 313-11446]	IRGC 127647	ind2			SNPseek				C	G	C	A	A	G	G	G	T	G		C	A	A	G	C	T	C	A	G	C	G		C	A	T	C				G	G	G	A	T	C	C		A
HAP3b	IRIS 313-11487	LALDIGHA::IRGC 53541-1::[IRIS 313-11487]	IRGC 128358	ind2			SNPseek				C	G	C	A	A	G	G	G	T	G		C	A	A	G	C	T	C	A	G	C	G		C	A	T	C				G	G	G	A	T	C	C		A
HAP3b	IRIS 313-12142	ATT CHHMOUS::IRGC 87030-1::[IRIS 313-12142]	IRGC 127177	ind3			SNPseek				C	G	C	A	A	G	G	G	T	G		C	A	A	G	C	T	C	A	G	C	G		C	A	T	C				G	G	G	A	T	C	C		A
HAP3b	IRIS 313-10476	PACHCHAIPERUMAL 2462-11::IRGC 3474-1::[IRIS 313-10476]	IRGC 127698	ind2			SNPseek				C	G	C	A	A	G	G	G	T	G		C	A	A	G	C	T	C	A	G	C	G		C	G/A	T	C				G	G	G	A	T	C	C		A
HAP3b	IRIS 313-10526	CO 2::IRGC 6186-2::[IRIS 313-10526]		ind2			SNPseek				C	G	C	G/A	A	G	G	G	T	G		C	A	A	G	C	T	C	A	G	C	G		C	A	T	C				G	G	G	A	T	C	C		A
HAP3b	IRIS 313-10527	ADT 12::IRGC 6254-1::[IRIS 313-10527]	IRGC 127107	ind2			SNPseek				C	G	C	G/A	A	G	G	G	T	G		C	A	A	G	C	T	C	A	G	C	G		C	A	T	C				G	G	G	A	T	C	C		A
HAP3b	IRIS 313-10674	ARC 10846::IRGC 12656-2::[IRIS 313-10674]	IRGC 127932	indx			SNPseek				C	G	C	G/A	A	G	G	G	T	G		C	A	A	G	C	T	C	A	G	C	G		C	A	T	C				G	G	G	A	T	C	C		A
HAP3b	IRIS 313-10719	VELLAI KOLOMBAN::IRGC 15517-1::[IRIS 313-10719]	IRGC 127886	ind2			SNPseek				C	G	C	A	A	G	G	G	T	G		C	A	A	G	C	T	C	G/A		C	G		C	A	T	C				G	G	G	A	T	C	C		A
HAP3b	IRIS 313-10941	SINTHA::IRGC 24687-1::[IRIS 313-10941]	IRGC 127809	indx			SNPseek				C	G	C	A	A	G	G	G	T	A/G		C	A	A	G	C	T	C	A	G	C	G		C	A	T	C				G	G	G	A	T	C	C		A
HAP3b	IRIS 313-11149	YODAYA::IRGC 33901-2::[IRIS 313-11149]	IRGC 128204	ind3			SNPseek				C	G	C	A	C/A		G	G	T	G		C	A	A	G	C	T	C	A	G	C	G		C	A	T	C				G	G	G	A	T	C	C		A
HAP3b	IRIS 313-11162	SABRAN::IRGC 34630-1::[IRIS 313-11162]	IRGC 127775	ind1B		sd1	SNPseek				C	G	C	G/A	A	G	G	G	T	G		C	A	A	G	C	T	C	A	G	C			C	A	T	C				G	C	G	A	T	C	C		A
HAP3b	IRIS 313-11226	SADAJIRA 19-258::IRGC 38293-2::[IRIS 313-11226]	IRGC 128153	ind2			SNPseek				C	G	C	A	A	G	G	G	T	G		C	A	A	G	C	T	C	A	G	C	T/G		C	A	T	C				G	G	G	A	T	C	C		A
HAP3b	IRIS 313-11363	KHEJURTHUPI::IRGC 46137-2::[IRIS 313-11363]	IRGC 128089	ind2			SNPseek				C	G	C	A	A	G	G	G	T	G		C	A	A	G	C	T	C	A	G	C	G		C	A	T	C				G	G	G	A	T	C	C		A
HAP3b	IRIS 313-11419	MUTHA SAMBA::IRGC 49924-2::[IRIS 313-11419]		indx			SNPseek				C	G	C	G/A	A	G	G	G	T	G		C	A	A	G	C	T	C	A	G	C	G		C	A	T	C				G	G	G	A	T	C	C		A
HAP3b	CX207	GAOZI::[CX207]		indx			SNPseek				C	G	C	A	A	G	G	G	T	G		C	A	A	G	C	T	C	A	G	C	G		C	A	T	C				G	G	G	A	T	C	T/C		A
HAP3b	IRIS 313-8586	PLI KHAO::IRGC 64596-1::[IRIS 313-8586]	IRGC 126081	ind3			SNPseek				C	G	C	A	A	G	G	G	T	G		C	A	A	G	C	T	C	A	G	C	G		C	A	T	C				G	G	G	A	T	C	C		G/A
HAP3b	IRIS 313-8632	PATMADHAI 1::IRGC 77292-1::[IRIS 313-8632]		ind2			SNPseek				C	G	C		A	G	G	G	T	G		C	A	A	G		T	C	A	G	C	G		C	A	T	C				G	G	G	A	T	C	C		A
HAP3b	IRIS 313-8704	ROPA::IRGC 74774-1::[IRIS 313-8704]		ind2			SNPseek				C	G	C	A	A	G	G	G	T	G		C	A	A	G	C		C	A	G	C	G		C	A		C				G	G	G	A	T	C	C		A
HAP3b	IRIS 313-8796	DUDH KADAR::IRGC 67707-1::[IRIS 313-8796]	IRGC 125607	ind2			SNPseek				C	G	C	A	A	G	G	G	T	G		C	A	A	G	C	T	C	A	G	C	G		C	A	T					G	G	G	A	T	C	C		A
HAP3b	IRIS 313-8924	KUTTA::IRGC 52184-1::[IRIS 313-8924]	IRGC 125815	ind2			SNPseek				C	G	C	A	A	G	G	G	T	G		C	A	A	G	C	T	C	A	G	C	G		C		T	C				G	G	G	A	T	C	C		A
HAP3b	IRIS 313-9072	MUTA GANJE::IRGC 26744-1::[IRIS 313-9072]	IRGC 125847	ind2			SNPseek				C	G	C	A	A	G	G	G	T	G		C	A	A	G	C	T	C	A	G	C	G		C	A	T					G	G	G	A	T	C	C		A
HAP3b	IRIS 313-9256	GALWAKA HANDERAN::IRGC 31381-1::[IRIS 313-9256]	IRGC 125746	indx			SNPseek				C	G	C	A	A	G	G	G	T	G		C	A	A	G	C	T	C	A	G	C	G		C	A	T					G	G	G	A	T	C	C		A
HAP3b	IRIS 313-10294	IR 21015-72-3-3-3-1::IRGC 117004-1::[IRIS 313-10294]	IRGC 125972	indx		sd1	SNPseek				C	G	C		A	G	G	G	T	G		C		A	G	C	T	C	A	G	C	G		C	A	T	C				G	C	G	A	T	C	C		A
HAP3b	IRIS 313-10355	IR 31142-14-1-1-3-1-1-2::IRGC 117378-1::[IRIS 313-10355]	IRGC 126023	indx			SNPseek				C	G	C	A	A	G	G	G	T	G		C	A	A	G	C	T	C	A	G	C	G		C		T	C				G	G	G	A	T	C	C		A
HAP3b	IRIS 313-8870	KHAO PLAH LAI NAK::IRGC 65941-1::[IRIS 313-8870]		ind3			SNPseek				C	G	C	A	A	G	G	G	T	G		C	A	A	G	C	T	C	A	G	C	G		C		T	C				G	G	G	A	T	C	C		A
HAP3b	IRIS 313-10357	IR 52718-B-B-6-B-B-1-1::IRGC 117334-1::[IRIS 313-10357]	IRGC 126024	indx		sd1	SNPseek				C	G	C	A	A	G	G	G	C/T	A/G		C	A	A	G	C	T	C	A	G	C	G		C	A	T	C				G	G	G	A	T	C	C		A
HAP3b	IRIS 313-7720	LAITRA::GERVEX 8400-C1::[IRIS 313-7720]	IRGC 124405	ind2			SNPseek				C	G	C	A		G	G	G	T	G		C	A	A	G	C	T	C	A	G	C	G		C	A	T	C				G	G	G	A	T	C	C		A
HAP3b	IRIS 313-11491	BIR BAHADUR::IRGC 53889-1::[IRIS 313-11491]	IRGC 127230	ind2			SNPseek				C	G	C	A	A	G	G	G	T	G		C	A	A	G	C		C	A	G	C	G		C	A	T	C				G	G	G	A	T	C	C		A
HAP3b	IRIS 313-11509	PRADOO DAENG::IRGC 55265-1::[IRIS 313-11509]	IRGC 132035	ind3			SNPseek				C	G	C	A	A	G	G	G	T			C	A	A	G	C	T	C	A	G	C	G		C	A	T	C				G	G	G	A	T	C	C		A
HAP3b	IRIS 313-11563	BIJULI BATI::IRGC 58917-1::[IRIS 313-11563]	IRGC 127227	ind2			SNPseek				C	G	C	A	A	G	G	G	T	G		C		A	G	C	T	C	A	G	C	G		C	A	T	C				G	G	G	A	T	C	C		A
HAP3b	IRIS 313-11597	BHATA PYAGI::IRGC 60895-1::[IRIS 313-11597]	IRGC 127222	ind2			SNPseek				C	G	C	A	A	G	G	G	T	G		C	A	A	G	C	T	C	A	G	C	G		C	A	T	C				G	G	G	A	T	C	C		A
HAP3b	IRIS 313-11640	NCS 458::IRGC 62290-1::[IRIS 313-11640]	IRGC 127658	ind2			SNPseek				C	G	C	A	A	G	G	G	T	G		C	A	A	G	C	T	C	A	G	C	G		C	A	T					G	G	G	A	T	C	C		A
HAP3b	IRIS 313-11818	LETYONE::IRGC 70753-1::[IRIS 313-11818]	IRGC 128361	indx			SNPseek				C	G	C	A	A	G	G	G	T	G		C	A	A	G	C	T	C	A	G	C	G		C		T	C				G	G	G	A	T	C	C		A
HAP3b	IRIS 313-12015	DOGON IRI::IRGC 79882-1::[IRIS 313-12015]	IRGC 127333	ind2			SNPseek				C	G	C	A	A	G	G	G	C/T	A/G		C	A	A	G	C	T	C	A	G	C	G		C	A	T	C				G	G	G	A	T	C	C		A
HAP3b	IRIS 313-12039	NEANG AN::IRGC 81315-1::[IRIS 313-12039]	IRGC 135572	ind3			SNPseek				C	G	C	A	A	G	G	G	T	G		C	A	A	G	C	T	C	A	G	C	G		C	A						G	G	G	A	T	C	C		A
HAP3b	IRIS 313-12229	TAM::IRGC 92253-1::[IRIS 313-12229]	IRGC 127843	ind3		sd1	SNPseek				C	G	C	A	A	G	G	G	T	G		C	A	A	G	C	T	C	A	G	C	G		C	A	T					G	G	G	A	T	C	C		A
HAP3b	IRIS 313-10565	221 B 36-1-1-1-1::IRGC 7585-1::[IRIS 313-10565]	IRGC 127098	indx			SNPseek				C	G	C	A	A	G	G	G	T	G		C	A	A	G	C	T	C	A	G	C	G		C	A	T					G	G	G	A	T	C	C		A
HAP3b	IRIS 313-10610	ALAGUSAMBA::IRGC 8944-2::[IRIS 313-10610]	IRGC 132315	ind2			SNPseek				C	G	C	A	A	G	G	G	T	G		C	A	A	G	C	T		A	G	C	G		C	A	T					G	G	G	A	T	C	C		A
HAP3b	IRIS 313-10715	SUDU KARAYAL::IRGC 15348-1::[IRIS 313-10715]	IRGC 127827	ind2			SNPseek				C	G	C	A	A	G	G	G	T	G		C	A	A	G	C	T	C	A	G	C	G		C		T	C				G	G	G	A	T	C	C		A
HAP3b	IRIS 313-10855	ARC 10159::IRGC 20754-2::[IRIS 313-10855]	IRGC 132316	ind2			SNPseek				C	G	C	A	A	G	G	G	T	G		C	A	A	G	C	T	C	A	G	C	G		C	A	T					G	G	G	A	T	C	C		A
HAP3b	IRIS 313-10973	KALA DIGHA::IRGC 26367-2::[IRIS 313-10973]	IRGC 128064	ind2			SNPseek				C	G	C	A	A	G	G	G	T	G		C	A	A	G	C	T	C	A	G	C	G		C		T	C				G	G	G	A	T	C	C		A
HAP3b	IRIS 313-11114	BIRUI SAIL::IRGC 31745-2::[IRIS 313-11114]	IRGC 132305	ind2			SNPseek				C	G	C	A	A	G	G	G	T	G		C	A	A	G	C	T	C	A	G	C	G		C	A	T					G	G	G	A	T	C	C		A
HAP3b	IRIS 313-11230	STRAW 23-438::IRGC 38426-2::[IRIS 313-11230]	IRGC 128172	ind2			SNPseek				C	G	C	A	A	G	G	G	T	G		C	A	A	G	C	T	C	A	G	C	G		C	A	T					G	G	G	A	T	C	C		A
HAP3b	IRIS 313-11236	LIONG ORN::IRGC 38875-2::[IRIS 313-11236]	IRGC 128523	ind3			SNPseek				C	G	C	A	A	G	G	G	T	G		C	A	A	G	C	T	C	A	G	C			C	A	T	C				G	G	G	A	T	C	C		A
HAP3b	IRIS 313-11335	INANUPAN::IRGC 44461-2::[IRIS 313-11335]	IRGC 132339	ind2			SNPseek				C	G	C	A	A	G	G	G	T	G		C	A	A	G	C	T	C	A	G	C	G		C	A	T	C				G	G	G	A		C	C		A
HAP3b	IRIS 313-11408	CHITRAKALI::IRGC 49524-2::[IRIS 313-11408]	IRGC 128016	ind2			SNPseek				C	G	C	A	A	G	G	G	T	G		C	A	A	G	C		C	A	G	C	G		C	A	T	C				G	G	G	A	T	C	C		A
HAP3b	CX377	NERICA-L-27::[CX377]	IRGC 136006	ind1B		sd1	SNPseek				C	G	C	A	A	G	G	G	T	G		C	A	A	G	C	T			G	C	G		C	A	T					G	C	G	A	T	C	C		A
HAP3b	IRIS 313-8412	FEI GAI 122::IRGC 63599-1::[IRIS 313-8412]	IRGC 125609	indx			SNPseek				C	G	C	A	A	G	G	G	T	G		C		A	G	C	T	C	A	G	C	G		C		T	C				G	C	G	A	T	C	T/C		A
HAP3b	IRIS 313-10293	ECIA 24-107-1::IRGC 116978-1::[IRIS 313-10293]	IRGC 125962	ind1B		sd1	SNPseek				C	G	C	A	A	G	G	G	T	G		C	A	A	G	C	T	C	A	G	C	G		C	A	T					G	G	G	A	T	C	C		A
HAP3b	IRIS 313-12278	MENALAVA::IRGC 97122-1::[IRIS 313-12278]	IRGC 135774	ind2			SNPseek				C	G	C	A	A	G	G	G	T	G		C	A	A	G	C	T	C	A	G	C	G		C		T	C				G	G	G	A	T	C	C		A
HAP3b	IRIS 313-12325	DISSI::IRGC 101346-1::[IRIS 313-12325]	IRGC 127321	ind2			SNPseek				C	G	C		A	G	G	G	T	G		C	A	A	G	C	T	C	A	G	C	T/G		C	A	T	C				G	G	G	A	T	C	C		A
HAP3b	IRIS 313-10769	GAJA BARU::IRGC 17586-1::[IRIS 313-10769]	IRGC 127375	indx			SNPseek				C	G	C	A	A	G	G	G	T	G		C		A	G	C	C/T	C	A	G	C	G		C	A	T	C				G	G	G	A	T	C	C		A
HAP3b	IRIS 313-10880	ARC 12180::IRGC 21965-2::[IRIS 313-10880]	IRGC 127940	ind2			SNPseek				C	G	C	A	A	G	G	G	T	G		C	A	A	G	C	T	C	A	G	C			C	A	T	C				G	G	G	A	T	C	C		A
HAP3b	IRIS 313-8401	ARC 13530::IRGC 41146-1::[IRIS 313-8401]		indx			SNPseek				C			A	A	G	G	G	T	G		C	A	A	G	C	T	C	A	G	C	G		C	A	T	C				G	G	G	A	T	C	C		A
HAP3b	IRIS 313-10341	BR 5230-46-4::IRGC 117318-1::[IRIS 313-10341]	IRGC 121167	indx			SNPseek				C	G	C	A	A	G	G	G	T	G		C	A	A	G	C	T	C		G	C	G		C	A	T	C				G	G	G	A	T	C	C		A
HAP3b	IRIS 313-10348	CSR-89 IR-15::IRGC 117326-1::[IRIS 313-10348]	IRGC 125959	indx		sd1	SNPseek				C	G	C	A	A	G	G	G	T	G		C	A	A	G	C		C	A	G	C	G		C	A	T					G	G	G	A	T	C	C		A
HAP3b	IRIS 313-9302	GAM PAI 30-12-15::IRGC 831-1::[IRIS 313-9302]	IRGC 125747	ind3			SNPseek				C	G	C	A	A	G	G	G	T	G		C	A	A	G	C	T	C	A	G	C	G		C	A	T	C					G	G	G/A	T	C	C		A
HAP3b	IRIS 313-9611	WANGA BARUGULU::IRGC 52261-1::[IRIS 313-9611]	IRGC 125935	ind2			SNPseek				C			A	A	G	G	G	T	G		C	A	A	G	C	T	C	A	G	C	G		C	A	T	C				G	G	G	A	T	C	C		A
HAP3b	IRIS 313-8657	CO 19::IRGC 5905-1::[IRIS 313-8657]	IRGC 135525	indx			SNPseek				C	G	C	G/A	A	G	G	G	T	G		C	A	A	G	C	T	C	A	G	C	G		C	A	T	C				G	G	G	A	T	C	C		A
HAP3b	IRIS 313-8727	T 315::IRGC 54792-1::[IRIS 313-8727]	IRGC 126280	ind2			SNPseek				C	G	C	A	A	G	G	G	T	G		C	A	A	G	C	T	C	A	G	C	G				T	C				G	G	G	A	T	C	C		A
HAP3b	IRIS 313-11606	BOKDEL::IRGC 61085-1::[IRIS 313-11606]	IRGC 127233	ind2			SNPseek				C	G	C	A	A	G	G	G	T	G		C	A	A		C	T	C	A	G	C	G		C		T	C				G	G	G	A	T	C	C		A
HAP3b	IRIS 313-10662	KAHATAWEE::IRGC 12004-1::[IRIS 313-10662]	IRGC 127476	ind2			SNPseek				C	G			A	G	G	G	T	G		C	A	A	G	C	T	C	A	G	C	G		C	A	T	C				G	G	G	A	T	C	C		A
HAP3b	IRIS 313-11110	SAYAM::IRGC 31538-2::[IRIS 313-11110]	IRGC 128159	ind2			SNPseek				C	G	C	A	A	G	A/G	G	C/T	G		C	G/A	G/A	G	C	T	C	A	G	C	G		C	A	T	C				G	G	G	A	T	C	C		A
HAP3b	IRIS 313-11165	BENA JHUPI::IRGC 34850-2::[IRIS 313-11165]	IRGC 127993	aus			SNPseek				C	G	C	A	A	G	G	G	T	G		C	A	A	G	C		C	A	G	C			C	A	T	C				G	G	G	A	T	C	C		A
HAP3b	IRIS 313-11294	ARC 11245::IRGC 42651-2::[IRIS 313-11294]	IRGC 127936	ind2			SNPseek				C	G	C	A	A	G	G	G	T	G		C	A	A	G	C	T	C	A	G	C	G		C	A	T	C				G	G	G	A	T	C	C
HAP3b	IRIS 313-11271	ARC 14737::IRGC 41729-2::[IRIS 313-11271]	IRGC 127961	ind2			SNPseek				C	G	T/C	A	A	G	G	G	T	G		C	A	A	G	C	T	C	G/A		C	G		C	G/A	T	C				G	G	G	A	T	T/C	C		A
HAP3b	IRIS 313-11389	LEUANG PRA TAHN::IRGC 48292-2::[IRIS 313-11389]		ind3			SNPseek				C	G	C	A	A	G	G	G	T	G		C	A	A	G	C	T	C	A	G	C	G		C		T	C				G	G	G	A	T	C	C
HAP3b	IRIS 313-9732	MAMORIAKA::IRGC 68672-1::[IRIS 313-9732]	IRGC 125833	ind2			SNPseek				C	G	C	A	A	G	G	G	T	G		C	A	A		C	T	C	A	G	C	G		C		T	C				A/G	G	G	A	T	C	C		A
HAP3b	IRIS 313-8614	RAJHUSAI (ACR 12)::IRGC 53630-1::[IRIS 313-8614]	IRGC 126264	ind2			SNPseek				C	G	C	A	A	G	G	G	T			C			G	C	T	C	A	G	C	G		C	A	T	C				G	G	G	A	T	C	C		A
HAP3b	IRIS 313-9862	MODDAI KARUPPAN::IRGC 15465-1::[IRIS 313-9862]	IRGC 126139	ind2			SNPseek				C	G	C	A	A	G	G	G	T	G		C	A	A	G	C	T	C	A	G	C	G		C		T					G	G	G	A	T	C	C		A
HAP3b	IRIS 313-10971	BADAL::IRGC 26290-2::[IRIS 313-10971]	IRGC 127981	ind2			SNPseek				C	G	C	A	A	G	G	G	T	G		C			G	C	T	C	A	G	C	G		C		T	C				G	G	G	A	T	C	C		A
HAP3b	IRIS 313-11219	BLACK 28-564::IRGC 37815-2::[IRIS 313-11219]	IRGC 127998	ind2			SNPseek				C	G			A	G	G	G	T	G		C	A	A	G	C	T	C	A	G	C	G		C	A						G	G	G	A	T	C	C		A
HAP3b	IRIS 313-11339	MILAGROSA::IRGC 44634-2::[IRIS 313-11339]	IRGC 128109	ind2			SNPseek				C	G	C	A	A	G	G	G				C	A	A	G	C	T	C	A	G	C	G		C	A	T	C				G	G	G	A	T	C	C		A
HAP3b	IRIS 313-11411	DONRADAO::IRGC 49604-1::[IRIS 313-11411]	IRGC 127342	ind2			SNPseek				C	G	C	A	A	G	G	G				C	A	A	G	C	T	C	A	G	C	G		C	A	T					G	G	G	A	T	C	C		A
HAP3b	B028	IR 10179-23-1-3::[B028]	IRGC 135917	indx			SNPseek				C	G	T/C	G/A	A	G	G	G	T	A/G		C	A	A	T/G	C	T	C	A	G	C	G		C	A	T	T/C				G	G/C	A/G	G/A	T	C	C		A
HAP3b	B029	DUMAI::[B029]	IRGC 135885	ind1B		sd1	SNPseek				C	A/G	T/C	G/A	A	G	G	G	T	G		C	A	G/A	G	C	T	C	G/A	G	C	G		T/C	G/A	T	C				G	G/C	A/G	A	T	C	C		A
HAP3b	IRIS 313-10721	HALSUDU HEENATI::IRGC 15599-1::[IRIS 313-10721]	IRGC 127401	ind2			SNPseek				C	G	C	A	A	G	G	G	T	G		C	A	A		C		C	A	G	C	G		C		T					G	G	G	A	C/T	C	C		A
HAP3b	IRIS 313-9575	MAE YEU::IRGC 64509-1::[IRIS 313-9575]	IRGC 131916	ind3			SNPseek				C	G	C	A	A	G	G	G	T	G		C		A	G	C	T	C	A	G	C	G		C		T	C				G	G			T	C	C		A
HAP3b	IRIS 313-10539	BADAL 76::IRGC 6586-1::[IRIS 313-10539]	IRGC 127199	ind2			SNPseek				C	G	C	A	A	G	G	G	T	G		C	A	A	G	C		C	A	G	C	G		C	A	T					G	G			T	C	C
HAP3b	B193	C.MEDIO 7::[B193]	IRGC 135869	indx		sd1	SNPseek				C			A	A	G	G	G	T	G		C	A	A		C	T	C	A	G	C	G		C		T	C				G	G	G	A		T/C	C		A
HAP3b	IRIS 313-9882	O. SATIVA::IRGC 17083-1::[IRIS 313-9882]	IRGC 125863	indx			SNPseek				C	G	C	A	A	G	G	G	T	G		C	A	A	G	C	T	C	A	G	C	G		C	A	T	C				G	G	G	A	T	C	C		A
HAP3b	IRIS 313-8571	ES 21::IRGC 56171-1::[IRIS 313-8571]	IRGC 126204	ind3			SNPseek				C	G	C	A	A	G	G	G	T	G		C	A	A	G	C	T	C	A	G	C	G		C	A	T	C				G	G	G	A	T	C	C		A
HAP3b	B019	BULEIDA A-75::[B019]	IRGC 135852	indx			SNPseek				C	G	C	A	C/A	G/A	G	G	T	G		C	A	A	G	C	T	C	G/A	G	C	G		C	A	T	T/C				G	G	G	A	T	T/C	C		A
HAP3b	CX361	G341::[CX361]		ind1B		sd1	SNPseek				C	G	C	A	A	G	G	G	T	G		C	A	A	G	C		C	A	G	C	G		C	A						G	G	G	A	T	C	C		A
HAP3b	IRIS 313-8914	E 2040::IRGC 67968-1::[IRIS 313-8914]	IRGC 125731	indx			SNPseek				C	G	C	A	C	A	G	G	T	G		C	A	A	G	A	T	C	G	G	C	G		C	A	C	T				G	G	G	G	T	T	C		A
HAP3b	IRIS 313-11987	IR 10120-7-2-1-4::IRGC 78628-1::[IRIS 313-11987]	IRGC 127433	indx			SNPseek				C	G	C	A	C	A	G	G	T	G		C	A	A	G	A	T	C	G	G	C	G		C	A	C	T				G	G	G	G	T	T	C		A
HAP3b	IRIS 313-11425	BRANCO PRECOCE::IRGC 50441-2::[IRIS 313-11425]	IRGC 128003	admix			SNPseek				C	A/G	T/C	G/A	C/A	G	A/G	G	C/T			C	G/A	G/A		C	C/T	C	G/A	G	C	T/G		C	A	T	T/C				A/G	G/C	A/G	G/A	C/T	T/C	T/C		G/A
HAP4
HAP4a	IRIS 313-11594	CHAN THANH HOA::IRGC 60647-1::[IRIS 313-11594]	IRGC 127259	indx	G		De novo assembled	G	T	C	T	G	C	A	A	G	G	C	T	G	T	G	A	A	G	C	T	C	A	G	C	G	C	C	A	T	C				G	G	G	A	T	C	C		A
HAP4a	IRIS 313-11528	ZO::IRGC 56914-1::[IRIS 313-11528]	IRGC 127917	ind3	G		De novo assembled	G	T	C	T	G	C	A	A	G	G	C	T	G	T	G	A	A	G	C	T	C	A	G	C	G	C	C	A	T	C				G	G	G	A	T	C	C		A
HAP4a	B140	PEI C122::[B140]		ind1A	G		De novo assembled	G	T	C	T	G	C	A	A	G	G	C	T	G	T	G	A	A	G	C	T	C	A	G	C	G	C	C	A	T	C				G	G	G	A	T	C	C		A
HAP4a	IRIS 313-11710	LEUANG MAI::IRGC 66019-2::[IRIS 313-11710]	IRGC 134992	ind3	G		De novo assembled	G	T	C	T	G	C	A	A	G	G	C	T	G	T	G	A	A	G	C	T	C	A	G	C	G	C	C	A	T	C				G	G	G	A	T	C	C		A
HAP4a	IRIS 313-10755	NEP BA BONG TO::IRGC 17005-2::[IRIS 313-10755]	IRGC 128116	ind3	G		De novo assembled	G	T	C	T	G	C	A	A	G	G	C	T	G	T	G	A	A	G	C	T	C	A	G	C	G	C	C	A	T	C				G	G	G	A	T	C	C		A
HAP4a	IRIS 313-10727	KOUPENEDOU KOUBOURY::IRGC 16011-1::[IRIS 313-10727]		ind3	G		De novo assembled	G	T	C	T	G	C	A	A	G	G	C	T	G	T	G	A	A	G	C	T	C	A	G	C	G	C	C	A	T	C				G	G	G	A	T	C	C		A
HAP4a	IRIS 313-10396	IR 80340-23-B-12-6-B::IRGC 117309-1::[IRIS 313-10396]	IRGC 125987	indx	G		De novo assembled	G	T	C	T	G	C	A	A	G	G	C	T	G	T	G	A	A	G	C	T	C	A	G	C	G	C	C	A	T	C				G	G	G	A	T	C	C		A
HAP4a	IRIS 313-10682	PA KHENG::IRGC 12996-1::[IRIS 313-10682]	IRGC 127707	ind3	G		De novo assembled	G	T	C	T	G	C	A	A	G	G	C	T	G	T	G	A	A	G	C	T	C	A	G	C	G	C	C	A	T	C				G	G	G	A	T	C	C		A
HAP4a	CX233	IR58821-23-1-3-1::[CX233]	IRGC 135926	indx	G		De novo assembled	G	T	C	T	G	C	A	A	G	G	C	T	G	T	G	A	A	G	C	T	C	A	G	C	G	C	C	A	T	C				G	G	G	A	T	C	C		A
HAP4a	IRIS 313-9285	PALEPYU::IRGC 33549-1::[IRIS 313-9285]	IRGC 125866	indx	G		De novo assembled	G	T	C	T	G	C	A	A	G	G	C	T	G	T	G	A	A	G	C	T	C	A	G	C	G	C	C	A	T	C				G	G	G	A	T	C	C		A
HAP4a	IRIS 313-12263	KHIE TOM::IRGC 95601-1::[IRIS 313-12263]	IRGC 127521	ind3	G		De novo assembled	G	T	C	T	G	C	A	A	G	G	C	T	G	T	G	A	A	G	C	T	C	A	G	C	G	C	C	A	T	C				G	G	G	A	T	C	C		A
HAP4a	IRIS 313-12301	LG 10178::IRGC 98526-1::[IRIS 313-12301]	IRGC 127556	indx	G		De novo assembled	G	T	C	T	G	C	A	A	G	G	C	T	G	T	G	A	A	G	C	T	C	A	G	C	G	C	C	A	T	C				G	G	G	A	T	C	C		A
HAP4a	B219	HAOLAI::[B219]		indx	G		De novo assembled	G	T	C	T	G	C	A	A	G	G	C	T	G	T	G	A	A	G	C	T	C	A	G	C	G	C	C	A	T	C				G	G	G	A	T	C	C		A
HAP4a	IRIS 313-11126	ANBAW::IRGC 32932-2::[IRIS 313-11126]	IRGC 127926	indx	D_2		De novo assembled	G	T	C	T	G	C	A	A	G	G	C	T	G	T	G	A	A	G	C	T	C	A	G	C	G	C	C	A	T	C				G	G	G	A	T	C	C		A
HAP4a	IRIS 313-11779	KATUMANI::IRGC 69695-1::[IRIS 313-11779]	IRGC 127500	ind3	G		De novo assembled	G	T	C	T	G	C	A	A	G	G	C	T	G	T	G	A	A	G	C	T	C	A	N	C	G	C	C	A	T	C				G	G	G	A	T	C	C		A
HAP4a	IRIS 313-8253	KHAO DAWK MALI 105::IRGC 27748-2::[IRIS 313-8253]	IRGC 121235	ind3			SNPseek				T	G	C	A	A	G	G	C	T	G		G	A	A	G	C	T	C	A	G	C	G		C	A	T	C				G	G	G	A	T	C	C		A
HAP4a	IRIS 313-8409	SOM NGHE AN::IRGC 60751-1::[IRIS 313-8409]	IRGC 126007	indx			SNPseek				T	G	C	A	A	G	G	C	T	G		G	A	A	G	C	T	C	A	G	C	G		C	A	T	C				G	G	G	A	T	C	C		A
HAP4a	IRIS 313-10421	WAR 72-2-1-1::IRGC 117361-1::[IRIS 313-10421]	IRGC 121154	indx			SNPseek				T	G	C	A	A	G	G	C	T	G		G	A	A	G	C	T	C	A	G	C	G		C	A	T	C				G	G	G	A	T	C	C		A
HAP4a	IRIS 313-9111	XIA ZHI BAI::IRGC 53437-1::[IRIS 313-9111]	IRGC 125940	ind1A			SNPseek				T	G	C	A	A	G	G	C	T	G		G	A	A	G	C	T	C	A	G	C	G		C	A	T	C				G	G	G	A	T	C	C		A
HAP4a	IRIS 313-8341	BAT DO::IRGC 7014-1::[IRIS 313-8341]	IRGC 121599	indx			SNPseek				T	G	C	A	A	G	G	C	T	G		G	A	A	G	C	T	C	A	G	C	G		C	A	T	C				G	G	G	A	T	C	C		A
HAP4a	IRIS 313-8697	YEBAWYIN::IRGC 33885-1::[IRIS 313-8697]	IRGC 125628	ind3			SNPseek				T	G	C	A	A	G	G	C	T	G		G	A	A	G	C	T	C	A	G	C	G		C	A	T	C				G	G	G	A	T	C	C		A
HAP4a	IRIS 313-8980	E DAW HAWM::IRGC 47938-1::[IRIS 313-8980]	IRGC 126132	ind3			SNPseek				T	G	C	A	A	G	G	C	T	G		G	A	A	G	C	T	C	A	G	C	G		C	A	T	C				G	G	G	A	T	C	C		A
HAP4a	IRIS 313-8985	KHAO' HAWM::IRGC 78257-1::[IRIS 313-8985]	IRGC 126153	ind3			SNPseek				T	G	C	A	A	G	G	C	T	G		G	A	A	G	C	T	C	A	G	C	G		C	A	T	C				G	G	G	A	T	C	C		A
HAP4a	IRIS 313-9006	LONG KHI KRAI::IRGC 64490-1::[IRIS 313-9006]	IRGC 126985	ind3			SNPseek				T	G	C	A	A	G	G	C	T	G		G	A	A	G	C	T	C	A	G	C	G		C	A	T	C				G	G	G	A	T	C	C		A
HAP4a	IRIS 313-9112	LEUANG YAI 344::IRGC 651-1::[IRIS 313-9112]	IRGC 125826	ind3			SNPseek				T	G	C	A	A	G	G	C	T	G		G	A	A	G	C	T	C	A	G	C	G		C	A	T	C				G	G	G	A	T	C	C		A
HAP4a	IRIS 313-9119	LEUANG YAI 29-12-46::IRGC 24397-1::[IRIS 313-9119]	IRGC 125825	ind3			SNPseek				T	G	C	A	A	G	G	C	T	G		G	A	A	G	C	T	C	A	G	C	G		C	A	T	C				G	G	G	A	T	C	C		A
HAP4a	IRIS 313-9209	LEUANG LAI MAE PRAJAN::IRGC 71279-1::[IRIS 313-9209]	IRGC 126984	ind3			SNPseek				T	G	C	A	A	G	G	C	T	G		G	A	A	G	C	T	C	A	G	C	G		C	A	T	C				G	G	G	A	T	C	C		A
HAP4a	IRIS 313-9286	LEUANG TAWNG SOOK::IRGC 24394-1::[IRIS 313-9286]	IRGC 126137	ind3			SNPseek				T	G	C	A	A	G	G	C	T	G		G	A	A	G	C	T	C	A	G	C	G		C	A	T	C				G	G	G	A	T	C	C		A
HAP4a	IRIS 313-9533	DUD KUNING::IRGC 44-1::[IRIS 313-9533]	IRGC 125729	ind3			SNPseek				T	G	C	A	A	G	G	C	T	G		G	A	A	G	C	T	C	A	G	C	G		C	A	T	C				G	G	G	A	T	C	C		A
HAP4a	IRIS 313-9953	BAMOA A 75::IRGC 51101-1::[IRIS 313-9953]	IRGC 125671	indx		sd1	SNPseek				T	G	C	A	A	G	G	C	T	G		G	A	A	G	C	T	C	A	G	C	G		C	A	T	C				G	G	G	A	T	C	C		A
HAP4a	IRIS 313-9989	MELEKE::IRGC 56823-1::[IRIS 313-9989]	IRGC 125838	ind3			SNPseek				T	G	C	A	A	G	G	C	T	G		G	A	A	G	C	T	C	A	G	C	G		C	A	T	C				G	G	G	A	T	C	C		A
HAP4a	IRIS 313-10129	SAN SHIH TSI::IRGC 1038-1::[IRIS 313-10129]	IRGC 125897	ind1A			SNPseek				T	G	C	A	A	G	G	C	T	G		G	A	A	G	C	T	C	A	G	C	G		C	A	T	C				G	G	G	A	T	C	C		A
HAP4a	IRIS 313-10147	RD 19::IRGC 39174-1::[IRIS 313-10147]		ind3			SNPseek				T	G	C	A	A	G	G	C	T	G		G	A	A	G	C	T	C	A	G	C	G		C	A	T	C				G	G	G	A	T	C	C		A
HAP4a	IRIS 313-10168	MEI FENG 9::IRGC 63735-1::[IRIS 313-10168]	IRGC 125836	indx			SNPseek				T	G	C	A	A	G	G	C	T	G		G	A	A	G	C	T	C	A	G	C	G		C	A	T	C				G	G	G	A	T	C	C		A
HAP4a	IRIS 313-10374	IR 69502-6-SRN-3-UBN-1-B::IRGC 117290-1::[IRIS 313-10374]	IRGC 125979	indx			SNPseek				T	G	C	A	A	G	G	C	T	G		G	A	A	G	C	T	C	A	G	C	G		C	A	T	C				G	G	G	A	T	C	C		A
HAP4a	IRIS 313-8702	KHAO PRAHJIN::IRGC 64420-1::[IRIS 313-8702]		ind3			SNPseek				T	G	C	A	A	G	G	C	T	G		G	A	A	G	C	T	C	A	G	C	G		C	A	T	C				G	G	G	A	T	C	C		A
HAP4a	IRIS 313-9288	TONG MAH::IRGC 65577-1::[IRIS 313-9288]		ind3			SNPseek				T	G	C	A	A	G	G	C	T	G		G	A	A	G	C	T	C	A	G	C	G		C	A	T	C				G	G	G	A	T	C	C		A
HAP4a	IRIS 313-9402	PA FADAYA::IRGC 58524-1::[IRIS 313-9402]	IRGC 131944	indx			SNPseek				T	G	C	A	A	G	G	C	T	G		G	A	A	G	C	T	C	A	G	C	G		C	A	T	C				G	G	G	A	T	C	C		A
HAP4a	IRIS 313-7778	SOM CAU 70 A::IRGC 8227-C1::[IRIS 313-7778]	IRGC 122254	indx			SNPseek				T	G	C	A	A	G	G	C	T	G		G	A	A	G	C	T	C	A	G	C	G		C	A	T	C				G	G	G	A	T	C	C		A
HAP4a	IRIS 313-7620	GAMBIAKA::GERVEX 7920-C1::[IRIS 313-7620]	IRGC 124392	ind3			SNPseek				T	G	C	A	A	G	G	C	T	G		G	A	A	G	C	T	C	A	G	C	G		C	A	T	C				G	G	G	A	T	C	C		A
HAP4a	IRIS 313-11510	A 69-1::IRGC 55305-1::[IRIS 313-11510]	IRGC 127102	indx		sd1	SNPseek				T	G	C	A	A	G	G	C	T	G		G	A	A	G	C	T	C	A	G	C	G		C	A	T	C				G	G	G	A	T	C	C		A
HAP4a	IRIS 313-11530	JAO KHAO::IRGC 57046-1::[IRIS 313-11530]	IRGC 131993	ind3			SNPseek				T	G	C	A	A	G	G	C	T	G		G	A	A	G	C	T	C	A	G	C	G		C	A	T	C				G	G	G	A	T	C	C		A
HAP4a	IRIS 313-11545	MOE GAUNG PYU::IRGC 58120-1::[IRIS 313-11545]	IRGC 127628	indx			SNPseek				T	G	C	A	A	G	G	C	T	G		G	A	A	G	C	T	C	A	G	C	G		C	A	T	C				G	G	G	A	T	C	C		A
HAP4a	IRIS 313-11679	GASET BOW::IRGC 64316-1::[IRIS 313-11679]	IRGC 127380	ind3			SNPseek				T	G	C	A	A	G	G	C	T	G		G	A	A	G	C	T	C	A	G	C	G		C	A	T	C				G	G	G	A	T	C	C		A
HAP4a	IRIS 313-11680	KHAO BUN MI::IRGC 64366-2::[IRIS 313-11680]	IRGC 132346	ind3			SNPseek				T	G	C	A	A	G	G	C	T	G		G	A	A	G	C	T	C	A	G	C	G		C	A	T	C				G	G	G	A	T	C	C		A
HAP4a	IRIS 313-11684	OB CHUEY::IRGC 64568-1::[IRIS 313-11684]	IRGC 132021	ind3			SNPseek				T	G	C	A	A	G	G	C	T	G		G	A	A	G	C	T	C	A	G	C	G		C	A	T	C				G	G	G	A	T	C	C		A
HAP4a	IRIS 313-11688	SIA MOO::IRGC 64629-1::[IRIS 313-11688]	IRGC 135581	ind3			SNPseek				T	G	C	A	A	G	G	C	T	G		G	A	A	G	C	T	C	A	G	C	G		C	A	T	C				G	G	G	A	T	C	C		A
HAP4a	IRIS 313-11709	LEUANG KHAJAWN::IRGC 66014-1::[IRIS 313-11709]	IRGC 132010	ind3			SNPseek				T	G	C	A	A	G	G	C	T	G		G	A	A	G	C	T	C	A	G	C	G		C	A	T	C				G	G	G	A	T	C	C		A
HAP4a	IRIS 313-11720	DAW 85::IRGC 66704-1::[IRIS 313-11720]	IRGC 127302	ind3			SNPseek				T	G	C	A	A	G	G	C	T	G		G	A	A	G	C	T	C	A	G	C	G		C	A	T	C				G	G	G	A	T	C	C		A
HAP4a	IRIS 313-11721	GAEW DAENG::IRGC 66707-1::[IRIS 313-11721]	IRGC 127372	ind3			SNPseek				T	G	C	A	A	G	G	C	T	G		G	A	A	G	C	T	C	A	G	C	G		C	A	T	C				G	G	G	A	T	C	C		A
HAP4a	IRIS 313-11724	KONYAN::IRGC 66931-1::[IRIS 313-11724]	IRGC 127531	ind3			SNPseek				T	G	C	A	A	G	G	C	T	G		G	A	A	G	C	T	C	A	G	C	G		C	A	T	C				G	G	G	A	T	C	C		A
HAP4a	IRIS 313-11813	ZERO::IRGC 70707-2::[IRIS 313-11813]	IRGC 132372	ind3			SNPseek				T	G	C	A	A	G	G	C	T	G		G	A	A	G	C	T	C	A	G	C	G		C	A	T	C				G	G	G	A	T	C	C		A
HAP4a	IRIS 313-11814	KIKUBA::IRGC 70722-1::[IRIS 313-11814]	IRGC 127523	ind3			SNPseek				T	G	C	A	A	G	G	C	T	G		G	A	A	G	C	T	C	A	G	C	G		C	A	T	C				G	G	G	A	T	C	C		A
HAP4a	IRIS 313-11815	MOSHI::IRGC 70730-1::[IRIS 313-11815]	IRGC 127633	ind3			SNPseek				T	G	C	A	A	G	G	C	T	G		G	A	A	G	C	T	C	A	G	C	G		C	A	T	C				G	G	G	A	T	C	C		A
HAP4a	IRIS 313-11830	KANDEKE YAIGAITI::IRGC 70961-1::[IRIS 313-11830]	IRGC 132400	ind3			SNPseek				T	G	C	A	A	G	G	C	T	G		G	A	A	G	C	T	C	A	G	C	G		C	A	T	C				G	G	G	A	T	C	C		A
HAP4a	IRIS 313-11795	DA GU AI 7::IRGC 70075-1::[IRIS 313-11795]	IRGC 127291	ind1A		sd1	SNPseek				T	G	C	A	A	G	G	C	T	G		G	A	A	G	C	T	C	A	G	C	G		C	A	T	C				G	G	G	A	T	C	C		A
HAP4a	IRIS 313-11796	DU GEN CHUAN::IRGC 70083-1::[IRIS 313-11796]	IRGC 127345	ind1A			SNPseek				T	G	C	A	A	G	G	C	T	G		G	A	A	G	C	T	C	A	G	C	G		C	A	T	C				G	G	G	A	T	C	C		A
HAP4a	IRIS 313-11849	PULUT SELEMYAM::IRGC 71820-1::[IRIS 313-11849]	IRGC 128439	ind3			SNPseek				T	G	C	A	A	G	G	C	T	G		G	A	A	G	C	T	C	A	G	C	G		C	A	T	C				G	G	G	A	T	C	C		A
HAP4a	IRIS 313-11854	CHI GU::IRGC 71988-1::[IRIS 313-11854]	IRGC 127276	ind1A			SNPseek				T	G	C	A	A	G	G	C	T	G		G	A	A	G	C	T	C	A	G	C	G		C	A	T	C				G	G	G	A	T	C	C		A
HAP4a	IRIS 313-11855	DA GUAN YIN ZHAN::IRGC 72006-1::[IRIS 313-11855]	IRGC 127292	ind1A			SNPseek				T	G	C	A	A	G	G	C	T	G		G	A	A	G	C	T	C	A	G	C	G		C	A	T	C				G	G	G	A	T	C	C		A
HAP4a	IRIS 313-11867	KE SHU BAI::IRGC 72183-1::[IRIS 313-11867]	IRGC 127503	ind1A			SNPseek				T	G	C	A	A	G	G	C	T	G		G	A	A	G	C	T	C	A	G	C	G		C	A	T	C				G	G	G	A	T	C	C		A
HAP4a	IRIS 313-11869	MA WEI ZHAN::IRGC 72220-1::[IRIS 313-11869]	IRGC 127615	ind1A			SNPseek				T	G	C	A	A	G	G	C	T	G		G	A	A	G	C	T	C	A	G	C	G		C	A	T	C				G	G	G	A	T	C	C		A
HAP4a	IRIS 313-11870	NAN JING XIAO DAO::IRGC 72236-2::[IRIS 313-11870]	IRGC 132429	ind1A			SNPseek				T	G	C	A	A	G	G	C	T	G		G	A	A	G	C	T	C	A	G	C	G		C	A	T	C				G	G	G	A	T	C	C		A
HAP4a	IRIS 313-11909	HONG MI JIU GONG JI::IRGC 74031-1::[IRIS 313-11909]	IRGC 127414	ind1A			SNPseek				T	G	C	A	A	G	G	C	T	G		G	A	A	G	C	T	C	A	G	C	G		C	A	T	C				G	G	G	A	T	C	C		A
HAP4a	IRIS 313-11936	NEANG MINH TONN::IRGC 75366-2::[IRIS 313-11936]		ind3			SNPseek				T	G	C	A	A	G	G	C	T	G		G	A	A	G	C	T	C	A	G	C	G		C	A	T	C				G	G	G	A	T	C	C		A
HAP4a	IRIS 313-11988	POTOQOIN::IRGC 78677-1::[IRIS 313-11988]	IRGC 132033	indx			SNPseek				T	G	C	A	A	G	G	C	T	G		G	A	A	G	C	T	C	A	G	C	G		C	A	T	C				G	G	G	A	T	C	C		A
HAP4a	IRIS 313-11997	BARUM::IRGC 79108-1::[IRIS 313-11997]	IRGC 127213	ind3			SNPseek				T	G	C	A	A	G	G	C	T	G		G	A	A	G	C	T	C	A	G	C	G		C	A	T	C				G	G	G	A	T	C	C		A
HAP4a	IRIS 313-11983	KERIBAREFOR::IRGC 78454-1::[IRIS 313-11983]	IRGC 128337	ind2			SNPseek				T	G	C	A	A	G	G	C	T	G		G	A	A	G	C	T	C	A	G	C	G		C	A	T	C				G	G	G	A	T	C	C		A
HAP4a	IRIS 313-12066	MARAMAY::IRGC 82628-1::[IRIS 313-12066]	IRGC 127609	ind3			SNPseek				T	G	C	A	A	G	G	C	T	G		G	A	A	G	C	T	C	A	G	C	G		C	A	T	C				G	G	G	A	T	C	C		A
HAP4a	IRIS 313-12097	NEANG MINH::IRGC 83897-1::[IRIS 313-12097]	IRGC 135778	ind3			SNPseek				T	G	C	A	A	G	G	C	T	G		G	A	A	G	C	T	C	A	G	C	G		C	A	T	C				G	G	G	A	T	C	C		A
HAP4a	IRIS 313-12101	SAMRONG 2::IRGC 83951-1::[IRIS 313-12101]	IRGC 132298	ind3			SNPseek				T	G	C	A	A	G	G	C	T	G		G	A	A	G	C	T	C	A	G	C	G		C	A	T	C				G	G	G	A	T	C	C		A
HAP4a	IRIS 313-12133	TAP KHOUAY::IRGC 86373-1::[IRIS 313-12133]	IRGC 127849	ind3			SNPseek				T	G	C	A	A	G	G	C	T	G		G	A	A	G	C	T	C	A	G	C	G		C	A	T	C				G	G	G	A	T	C	C		A
HAP4a	IRIS 313-12188	CHAO DO::IRGC 89430-1::[IRIS 313-12188]	IRGC 127260	ind3			SNPseek				T	G	C	A	A	G	G	C	T	G		G	A	A	G	C	T	C	A	G	C	G		C	A	T	C				G	G	G	A	T	C	C		A
HAP4a	IRIS 313-12220	CHAO KHIE KHOUAY::IRGC 90968-1::[IRIS 313-12220]	IRGC 131976	indx			SNPseek				T	G	C	A	A	G	G	C	T	G		G	A	A	G	C	T	C	A	G	C	G		C	A	T	C				G	G	G	A	T	C	C		A
HAP4a	IRIS 313-12236	LAOZAOGU::IRGC 93444-1::[IRIS 313-12236]	IRGC 127552	ind1A			SNPseek				T	G	C	A	A	G	G	C	T	G		G	A	A	G	C	T	C	A	G	C	G		C	A	T	C				G	G	G	A	T	C	C		A
HAP4a	IRIS 313-12259	EA NOUAN::IRGC 95147-1::[IRIS 313-12259]	IRGC 127352	ind3			SNPseek				T	G	C	A	A	G	G	C	T	G		G	A	A	G	C	T	C	A	G	C	G		C	A	T	C				G	G	G	A	T	C	C		A
HAP4a	IRIS 313-12286	EKAYIN SAW::IRGC 97468-2::[IRIS 313-12286]	IRGC 128038	ind3			SNPseek				T	G	C	A	A	G	G	C	T	G		G	A	A	G	C	T	C	A	G	C	G		C	A	T	C				G	G	G	A	T	C	C		A
HAP4a	IRIS 313-12287	KAUK HNYINGWA::IRGC 97487-1::[IRIS 313-12287]	IRGC 127501	ind3			SNPseek				T	G	C	A	A	G	G	C	T	G		G	A	A	G	C	T	C	A	G	C	G		C	A	T	C				G	G	G	A	T	C	C		A
HAP4a	IRIS 313-12288	NGWE TOE KYE::IRGC 97530-1::[IRIS 313-12288]	IRGC 128405	ind3			SNPseek				T	G	C	A	A	G	G	C	T	G		G	A	A	G	C	T	C	A	G	C	G		C	A	T	C				G	G	G	A	T	C	C		A
HAP4a	IRIS 313-12305	PA KHENG KHAW::IRGC 98779-1::[IRIS 313-12305]	IRGC 127708	ind3			SNPseek				T	G	C	A	A	G	G	C	T	G		G	A	A	G	C	T	C	A	G	C	G		C	A	T	C				G	G	G	A	T	C	C		A
HAP4a	IRIS 313-10511	MACAN SAPAC::IRGC 5212-2::[IRIS 313-10511]	IRGC 128101	ind3			SNPseek				T	G	C	A	A	G	G	C	T	G		G	A	A	G	C	T	C	A	G	C	G		C	A	T	C				G	G	G	A	T	C	C		A
HAP4a	IRIS 313-10557	KONG MARETH 4 T 1::IRGC 7248-1::[IRIS 313-10557]	IRGC 135764	ind3			SNPseek				T	G	C	A	A	G	G	C	T	G		G	A	A	G	C	T	C	A	G	C	G		C	A	T	C				G	G	G	A	T	C	C		A
HAP4a	IRIS 313-10651	PHOU SAO LEUM NYANG::IRGC 11570-2::[IRIS 313-10651]	IRGC 128134	indx			SNPseek				T	G	C	A	A	G	G	C	T	G		G	A	A	G	C	T	C	A	G	C	G		C	A	T	C				G	G	G	A	T	C	C		A
HAP4a	IRIS 313-10683	NGAN TIA::IRGC 13010-1::[IRIS 313-10683]	IRGC 127674	ind3			SNPseek				T	G	C	A	A	G	G	C	T	G		G	A	A	G	C	T	C	A	G	C	G		C	A	T	C				G	G	G	A	T	C	C		A
HAP4a	IRIS 313-10726	POTO BALA::IRGC 15986-2::[IRIS 313-10726]	IRGC 128139	ind3			SNPseek				T	G	C	A	A	G	G	C	T	G		G	A	A	G	C	T	C	A	G	C	G		C	A	T	C				G	G	G	A	T	C	C		A
HAP4a	IRIS 313-10728	OUSSANTHIABA::IRGC 16046-2::[IRIS 313-10728]	IRGC 132261	indx			SNPseek				T	G	C	A	A	G	G	C	T	G		G	A	A	G	C	T	C	A	G	C	G		C	A	T	C				G	G	G	A	T	C	C		A
HAP4a	IRIS 313-10748	LUA DUC::IRGC 16718-1::[IRIS 313-10748]	IRGC 127578	indx			SNPseek				T	G	C	A	A	G	G	C	T	G		G	A	A	G	C	T	C	A	G	C	G		C	A	T	C				G	G	G	A	T	C	C		A
HAP4a	IRIS 313-10909	NEANG CHAN::IRGC 23034-1::[IRIS 313-10909]	IRGC 135776	ind3			SNPseek				T	G	C	A	A	G	G	C	T	G		G	A	A	G	C	T	C	A	G	C	G		C	A	T	C				G	G	G	A	T	C	C		A
HAP4a	IRIS 313-11083	EA TIA::IRGC 29713-2::[IRIS 313-11083]	IRGC 132248	ind3			SNPseek				T	G	C	A	A	G	G	C	T	G		G	A	A	G	C	T	C	A	G	C	G		C	A	T	C				G	G	G	A	T	C	C		A
HAP4a	IRIS 313-11133	LWANKHAN::IRGC 33330-1::[IRIS 313-11133]	IRGC 127582	ind3			SNPseek				T	G	C	A	A	G	G	C	T	G		G	A	A	G	C	T	C	A	G	C	G		C	A	T	C				G	G	G	A	T	C	C		A
HAP4a	IRIS 313-11194	KHAO PAH 8-5-38::IRGC 36587-1::[IRIS 313-11194]	IRGC 135760	ind3			SNPseek				T	G	C	A	A	G	G	C	T	G		G	A	A	G	C	T	C	A	G	C	G		C	A	T	C				G	G	G	A	T	C	C		A
HAP4a	IRIS 313-11386	KHAO DAWK MALI TIA::IRGC 47773-2::[IRIS 313-11386]	IRGC 128083	ind3			SNPseek				T	G	C	A	A	G	G	C	T	G		G	A	A	G	C	T	C	A	G	C	G		C	A	T	C				G	G	G	A	T	C	C		A
HAP4a	B006	YIKONG::[B006]	IRGC 136078	indx			SNPseek				T	G	C	A	A	G	G	C	T	G		G	A	A	G	C	T	C	A	G	C	G		C	A	T	C				G	G	G	A	T	C	C		A
HAP4a	B051	GZ 1368-5-4::[B051]	IRGC 135899	indx		sd1	SNPseek				T	G	C	A	A	G	G	C	T	G		G	A	A	G	C	T	C	A	G	C	G		C	A	T	C				G	G	G	A	T	C	C		A
HAP4a	B095	MOWANGGUNEIZA::[B095]		indx			SNPseek				T	G	C	A	A	G	G	C	T	G		G	A	A	G	C	T	C	A	G	C	G		C	A	T	C				G	G	G	A	T	C	C		A
HAP4a	B097	JIIENUO::[B097]		indx			SNPseek				T	G	C	A	A	G	G	C	T	G		G	A	A	G	C	T	C	A	G	C	G		C	A	T	C				G	G	G	A	T	C	C		A
HAP4a	B264	SANBAILI::[B264]		ind1A			SNPseek				T	G	C	A	A	G	G	C	T	G		G	A	A	G	C	T	C	A	G	C	G		C	A	T	C				G	G	G	A	T	C	C		A
HAP4a	CX231	IR52561-UBN-1-1-2::[CX231]	IRGC 135923	indx			SNPseek				T	G	C	A	A	G	G	C	T	G		G	A	A	G	C	T	C	A	G	C	G		C	A	T	C				G	G	G	A	T	C	C		A
HAP4a	CX273	NONA BOKRA::[CX273]		indx			SNPseek				T	G	C	A	A	G	G	C	T	G		G	A	A	G	C	T	C	A	G	C	G		C	A	T	C				G	G	G	A	T	C	C		A
HAP4a	CX274	IR26::[CX274]	IRGC 135919	indx			SNPseek				T	G	C	A	A	G	G	C	T	G		G	A	A	G	C	T	C	A	G	C	G		C	A	T	C				G	G	G	A	T	C	C		A
HAP4a	CX275	IR34::[CX275]		indx			SNPseek				T	G	C	A	A	G	G	C	T	G		G	A	A	G	C	T	C	A	G	C	G		C	A	T	C				G	G	G	A	T	C	C		A
HAP4a	IRIS 313-11544	LINPAN CHAW::IRGC 58087-1::[IRIS 313-11544]	IRGC 135570	indx			SNPseek				T	G	C	A	A	G	A/G	C	T	G		G	A	A	G	C	T	C	A	G	C	G		C	A	T	C				G	G	G	A	T	C	C		A
HAP4a	IRIS 313-11615	MANARE (PHOM)::IRGC 61437-1::[IRIS 313-11615]	IRGC 132408	ind3			SNPseek				T	G	C	A	A	G	G	C	T	G		G	A	A	G	C	T	C	A	G	C	G		C	G/A	T	C				G	G	G	A	T	C	C		A
HAP4a	IRIS 313-11674	BEUA KAE::IRGC 64221-1::[IRIS 313-11674]	IRGC 131971	ind3			SNPseek				C/T	G	C	A	A	G	G	C	T	G		G	A	A	G	C	T	C	A	G	C	G		C	A	T	C				G	G	G	A	T	C	C		A
HAP4a	IRIS 313-11682	MA EUE::IRGC 64502-1::[IRIS 313-11682]	IRGC 127588	ind3			SNPseek				T	G	C	A	A	G	G	C	T	G		G	A	A	T/G	C	T	C	A	G	C	G		C	A	T	C				G	G	G	A	T	C	C		A
HAP4a	IRIS 313-11898	MA YOO::IRGC 73507-1::[IRIS 313-11898]	IRGC 127617	ind3			SNPseek				T	G	C	A	A	G	G	C	T	G		G	A	A	G	C	T	C	G/A	G	C	G		C	A	T	C				G	G	G	A	T	C	C		A
HAP4a	IRIS 313-11893	KHAU DANH::IRGC 73201-1::[IRIS 313-11893]	IRGC 127519	indx			SNPseek				T	G	C	A	A	G	G	C	T	G		G	A	A	G	C	T	C	A	G	C	G		C	A	T	C				A/G	G	G	A	T	C	C		A
HAP4a	IRIS 313-12128	HMA GNENG::IRGC 85751-1::[IRIS 313-12128]	IRGC 127408	ind3			SNPseek				C/T	G	C	A	A	G	G	C	T	G		G	A	A	G	C	T	C	A	G	C	G		C	A	T	C				G	G	G	A	T	C	C		A
HAP4a	IRIS 313-12151	DAMNOEUB KRACHAK SESS::IRGC 87380-1::[IRIS 313-12151]	IRGC 132279	ind3			SNPseek				C/T	G	C	A	A	G	G	C	T	G		G	A	A	G	C	T	C	A	G	C	G		C	A	T	C				G	G	G	A	T	C	C		A
HAP4a	IRIS 313-10751	LUA CHUM::IRGC 16840-1::[IRIS 313-10751]	IRGC 127577	indx			SNPseek				T	G	C	A	A	G	G	C	T	G		G	A	A	G	C	T	C	A	G	C	G		C	A	T	C				G	G	G	A	C/T	C	C		A
HAP4a	IRIS 313-11101	Y 115::IRGC 30856-2::[IRIS 313-11101]	IRGC 128202	indx			SNPseek				T	G	C	G/A	A	G	G	C	T	G		G	A	A	G	C	T	C	A	G	C	G		C	A	T	C				G	G	G	A	T	C	C		A
HAP4a	IRIS 313-11341	MINDANAO::IRGC 44642-2::[IRIS 313-11341]	IRGC 128110	ind3			SNPseek				T	G	C	A	A	G	G	C	T	G		G	G/A	A	G	C	T	C	A	G	C	G		C	A	T	C				G	G	G	A	T	C	C		A
HAP4a	B010	MALAIHONG::[B010]		ind1A			SNPseek				T	G	C	A	A	G	G	C	T	A/G		G	A	A	G	C	T	C	A	G	C	G		C	A	T	C				G	G	G	A	T	C	C		A
HAP4a	B079	ESINIU::[B079]	IRGC 135887	ind1A			SNPseek				T	G	C	A	A	G	G	C	T	G		G	A	A	G	C	T	C	A	G	C	G		C	A	T	C				G	G	G	A	T	C	C		A
HAP4a	B246	LAOZAOGU::[B246]		indx			SNPseek				T	G	C	A	A	G	G	C	T	G		G	A	A	G	C	T	C	A	G	C	G		C	A	T	C				G	G	G	A	T	C	C		A
HAP4a	CX154	KHAO DAWK MALI 105::[CX154]	IRGC 135967	ind3			SNPseek				T	G	C	A	A	G	G	C	T	G		G	A	A	G	C	T	C	A	G	C	G		C	A	T	C				A/G	G	G	A	T	C	C		A
HAP4a	IRIS 313-9116	LEUANG YAI 2 B 72::IRGC 882-1::[IRIS 313-9116]	IRGC 126138	ind3			SNPseek				C/T	G	C	G/A	A	G	G	C	T	G		G	A	A	G	C	T	C	A	G	C	G		C	A	T	C				G	G	G	A	T	C	C		A
HAP4a	IRIS 313-9898	QUERO ASSAN::IRGC 28860-1::[IRIS 313-9898]	IRGC 125880	ind3			SNPseek				T	G		A	A	G	G	C	T	G		G	A	A	G	C	T	C	A	G	C	G		C	A	T	C				G	G	G	A	T	C	C		A
HAP4a	IRIS 313-10154	HE GU TSAO::IRGC 51302-1::[IRIS 313-10154]	IRGC 125760	ind1A			SNPseek				T	G	C	A	A	G	G	C	T	G		G	A	A	G	C	T	C	A	G	C	G		C	A	T	C				G	G	G	A	T	C	C
HAP4a	IRIS 313-8722	HAWM TOONG::IRGC 48007-1::[IRIS 313-8722]		ind3			SNPseek				T	G	C	A	A	G	G	C	T	G		G	A	A	G	C	T	C	A	G	C	G		C	A	T	C				G	G	G	A	T	C			A
HAP4a	IRIS 313-11921	KHAO GAHB BUA::IRGC 74937-1::[IRIS 313-11921]	IRGC 132401	ind3			SNPseek				T	G	C	A	A	G	G	C	T	G		G	A	A	G	C	T	C	A	G	C	G		C	A	T					G	G	G	A	T	C	C		A
HAP4a	IRIS 313-11965	GUANG XUAN LIU HAO::IRGC 77341-1::[IRIS 313-11965]	IRGC 128304	ind1A		sd1	SNPseek				T	G	C	A	A	G	G	C	T	G		G	A	A	G	C	T	C	A	G				C	A	T	C				G	G	G	A	T	C	C		A
HAP4a	IRIS 313-12043	SAMBOK ANGKRANG::IRGC 81375-1::[IRIS 313-12043]	IRGC 128458	ind3			SNPseek				T	G	C	A	A	G	G	C	T	G		G		A	G	C	T	C	A	G	C	G		C	A	T	C				G	G	G	A	T	C	C		A
HAP4a	IRIS 313-12221	EA LOUY::IRGC 91220-1::[IRIS 313-12221]	IRGC 127351	ind3			SNPseek				C/T	A/G	C	A	A	G	G	C	T	G		G	A	A	G	C	T	C	A	G	C	G		C	A	T	C				G	G	G	A	T	C	C		A
HAP4a	IRIS 313-12302	LG 4153::IRGC 98528-1::[IRIS 313-12302]	IRGC 127560	ind3			SNPseek				T	G	C	A	A	G	G	C	T	G		G	A	A	G	C	T	C	A	G	C	G		C	A	T					G	G	G	A	T	C	C		A
HAP4a	IRIS 313-10908	MOROM::IRGC 23016-2::[IRIS 313-10908]	IRGC 128112	ind3			SNPseek				T	G	C	A	A	G	G	C	T			G	A	A	G	C	T	C	A	G	C	G		C	A	T	C				G	G	G	A	T	C	C		A
HAP4a	IRIS 313-11391	NIAW DAM::IRGC 48387-2::[IRIS 313-11391]	IRGC 132260	ind3			SNPseek				T	G	C	A	A	G	G	G/C	T	G		G	A	A	G	C	T	C	A	G	C	G		C	A	T	C				G	G	G	A	T	C	C		A
HAP4a	IRIS 313-11392	SA MER::IRGC 48454-2::[IRIS 313-11392]	IRGC 128156	ind3			SNPseek				T	G	C	A	A	G	G	C	T	G		G	A	A	G	C	T	C	A	G	C	G		C		T	C				G	G	G	A	T	C	C		A
HAP4a	IRIS 313-11393	SAWNG RUANG::IRGC 48458-2::[IRIS 313-11393]	IRGC 132267	ind3			SNPseek				T	G	C	A	A	G		C	T	G		G	A	A	G	C	T	C	A	G	C	G		C	A	T	C				G	G	G	A	T	C	C		A
HAP4a	CX71	INNMAYEBAW::[CX71]	IRGC 135915	ind3			SNPseek				T	G	C	A	A	G	G	C	T	G		G	A	A	G	C	T	C	A	G	C	G		C	A	T					G	G	G	A	T	C	C		A
HAP4a	IRIS 313-10151	RD 15::IRGC 47705-1::[IRIS 313-10151]	IRGC 126003	ind3			SNPseek				T	G	C	A	A	G	G	G/C	T	G		G	A	A	G	C	T	C	A	G	C	G		C	A	T					G	G	G	A	T	C	C		A
HAP4a	IRIS 313-11705	DAWK PUD KHAO::IRGC 65808-1::[IRIS 313-11705]	IRGC 127303	ind3			SNPseek				T	G	C	A	A	G	G	C	T	G		G	A	A	T/G	C	T	C	A	G	C	G		C	G/A	T	C				G	G	G	A	C/T	C	C		A
HAP4a	IRIS 313-10585	UKON NISHIKI::IRGC 8314-1::[IRIS 313-10585]	IRGC 128494	admix			SNPseek				C/T	G	C	A	A	G	G	C	T	G		G	A	A	G	C	T	C	A	G	C	G		C		T	C				G	G	G	A	T	C	C		A
HAP4a	IRIS 313-10724	MOUSOIR::IRGC 15866-1::[IRIS 313-10724]		ind3			SNPseek				T	G	C	A	C/A	G	A/G	C	T	G		C/G	A	A	G	C	T	C	A	G	C	G		C	A	T	C				G	G	G	A	T	C	C		A
HAP4a	CX35	BG 94-1::[CX35]	IRGC 135843	indx			SNPseek				C/T	G	C	A	C/A	G	G	G/C	T	G		G	A	A	G	C	T	C	A	G	C	G		C	A	T	C				G	G	G	A	T	C	C		A
HAP4a	IRIS 313-8967	ARC 12576::IRGC 22163-1::[IRIS 313-8967]	IRGC 125645	indx		sd1	SNPseek				C/T	G	C	A	A	G	G	G/C	T	G		C/G	A	A	G	C	T	C	A	G	C	G		C	A	T	C				G	G	G	A	T	C	C		A
HAP4a	IRIS 313-8793	KHAO THI RATE::IRGC 58041-1::[IRIS 313-8793]	IRGC 126223	ind3			SNPseek				T	G	C	A	A	G	G	C	T	G		G	A		G	C	T	C			C	G		C	A	T	C				G	G	G	A	T	C	C		A
HAP4a	IRIS 313-11835	E NOI NAH::IRGC 71138-1::[IRIS 313-11835]	IRGC 128287	indx			SNPseek				C/T	G	C	A	A		G	G/C	T	G		G	A	A	G	C	T	C	A	G	C	G		C	A	T/C	T/C				G	G	G	G/A	T	T/C	C		A
HAP4a	IRIS 313-10705	PADI PULOT MELAYANG::IRGC 14391-2::[IRIS 313-10705]	IRGC 128124	indx			SNPseek				C/T	G	C	A	A	G	G	G/C	T	G		C/G	A	A	G	C	T	C	A	G	C	G		C	A	T	C				G	G	G	A	T	C	C		A
HAP4a	IRIS 313-10906	LUA NEP 4416::IRGC 23006-1::[IRIS 313-10906]		ind3			SNPseek				T	G	C	A	A	G	G	C	T	G		G	A	A	G	C	T	C	A	G	C	G		C	A						G	G		A	T	C	C		A
HAP4a	IRIS 313-10934	PAH PIANG::IRGC 24452-2::[IRIS 313-10934]	IRGC 128125	ind3			SNPseek				T	G	C	A	A	G	G	C	T	G		G	A	A	G	C	T	C	A	G	C	G				T	C				G	G	G	A	T	C	C		A
HAP4a	IRIS 313-11086	KHAO THAMA::IRGC 29838-2::[IRIS 313-11086]	IRGC 128087	ind3			SNPseek				T	G	C	A	A	G	G	C	T	G		G	A	A	G	C		C	A	G	C	G		C	A	T					G	G	G	A	T	C	C		A
HAP4a	IRIS 313-8485	NAM SA GUI 19::[IRIS 313-8485]	IRGC 117536	ind3			SNPseek				T	G	C	A	A	G	G	C	T			G		A	G	C	T	C	A	G	C	G		C	A	T	C				G	G	G	A	T	C	C		A
HAP4a	IRIS 313-8895	LEUANG DAM::IRGC 78267-1::[IRIS 313-8895]	IRGC 126156	ind3			SNPseek				T	G	C	A	A	G	G	C	T	G		G	A	A	G	C	T	C	A	G	C	G		C	A	T	C				G	G	G	A		C	C		A
HAP4a	IRIS 313-9115	LEUANG YAI 29-12-2::IRGC 881-1::[IRIS 313-9115]	IRGC 126157	ind3			SNPseek				T	G	C	A	A	G	G	C				G	A	A	G	C	T	C	A	G	C	G		C	A	T	C				G	G	G	A	T	C	C		A
HAP4a	IRIS 313-11486	KHAGRAI DIGHA::IRGC 53529-1::[IRIS 313-11486]	IRGC 135757	admix			SNPseek				T	G	C	A	A	G	G		T	G		C/G	A	A	G	C	T	C/T	A	G	C/T	G		C	A	T					G	G	G	G/A	T	T/C	C		A
HAP4a	IRIS 313-11549	TAUNGYA SABA::IRGC 58226-1::[IRIS 313-11549]	IRGC 128483	indx			SNPseek				T	G	C	A	A	G	G	C	T	G			A	A	G	C		C	A	G	C			C	A	T	C				G	G	G	A	T	C	C		A
HAP4a	IRIS 313-12247	DAMNOEUB KRAMOUM::IRGC 94084-2::[IRIS 313-12247]	IRGC 128026	ind3			SNPseek				T	G	C	A	A	G	G	C				G	A	A	G	C	T	C	A	G	C	G		C	A	T					G	G	G	A	T	C	C		A
HAP4a	IRIS 313-10497	CE IN TSAN::IRGC 4362-1::[IRIS 313-10497]	IRGC 127249	ind1A			SNPseek				T	G	C	A	A	G	G	C	T	G			A	A	G	C	T	C	A	G	C	G		C		T					G	G	G	A	T	C	C		A
HAP4a	CX128	GAJALE::[CX128]	IRGC 135889	indx			SNPseek				C/T	G	C	A	A	G	G	C	T	G		C/G	A	A	G	C	T	C	A	G	C	G		C							G	G	G	A	T	C	C		A
HAP4a	IRIS 313-10912	NEANG SAATH K 45::IRGC 23109-2::[IRIS 313-10912]		ind3			SNPseek				C/T	G	C	A	C/A	G/A	G	G/C	T	G		C/G	A	A	G	C/A	T	C	G/A	G	C	G		C	A	T/C	T/C				G	G	G	G/A	T	T/C	C		A
HAP4a	B165	HAOHUANGLA::[B165]		indx			SNPseek				C/T	G	C	A	A	G	G	C	T	G		G		A	G	C	T	C	A	G	C				A	T	C				G	G	G	A	T	C	C		A
HAP4b	IRIS 313-10972	DUDA MONOR::IRGC 26335-2::[IRIS 313-10972]	IRGC 128033	ind2	I		De novo assembled	G	C	C	C	G	C	A	A	G	G	G	T	G	T	C	A	A	G	C	T	C	A	G	C	G	C	C	A	T	C				G	G	G	A	T	C	C		A
HAP4b	B254	JINGHU3 B::[B254]		indx	I		De novo assembled	G	C	C	C	G	C	A	A	G	G	G	T	G	T	C	A	A	G	C	T	C	A	G	C	G	C	C	A	T	C				G	G	G	A	T	C	C		A
HAP4b	IRIS 313-11977	MAMORIAKA::IRGC 77867-1::[IRIS 313-11977]	IRGC 127601	indx	I		De novo assembled	G	C	C	C	G	C	A	A	G	G	G	T	G	T	C	A	A	G	C	T	C	A	G	C	G	C	C	A	T	C				G	G	G	A	T	C	C		A
HAP4b	IRIS 313-9409	GUMPANGAR::IRGC 71524-1::[IRIS 313-9409]	IRGC 131937	ind3	I		De novo assembled	G	C	C	C	G	C	A	A	G	G	G	T	G	T	C	A	A	G	C	T	C	A	G	C	G	C	C	A	T	C				G	G	G	A	T	C	C		A
HAP4b	CX147	SEBERANG::[CX147]		indx	I		De novo assembled	G	C	C	C	G	C	A	A	G	G	G	T	G	T	C	A	A	G	C	T	C	A	G	C	G	C	C	A	T	C				G	G	G	A	T	C	C		A
HAP4b	IRIS 313-9066	AUS 177::IRGC 29009-1::[IRIS 313-9066]	IRGC 125659	ind1B	I		De novo assembled	G	C	C	C	G	C	A	A	G	G	G	T	G	T	C	A	A	G	C	T	C	A	G	C	G	C	C	A	T	C				G	G	G	A	T	C	C		A
HAP4b	IRIS 313-11787	TANDAKAY FINGO::IRGC 69793-1::[IRIS 313-11787]	IRGC 127845	ind2	I		De novo assembled	G	C	C	C	G	C	A	A	G	G	G	T	G	T	C	A	A	G	C	T	C	A	G	C	G	C	C	A	T	C				G	G	G	A	T	C	C		A
HAP4b	IRIS 313-11334	DINGRAS::IRGC 44402-1::[IRIS 313-11334]		ind3	I		De novo assembled	G	C	C	C	G	C	A	A	G	G	G	T	G	T	C	A	A	G	C	T	C	A	G	C	G	C	C	A	T	C				G	G	G	A	T	C	C		A
HAP4b	IRIS 313-11808	R 762::IRGC 70531-1::[IRIS 313-11808]	IRGC 128444	indx	I	sd1	De novo assembled	G	C	C	C	G	C	A	A	G	G	G	T	G	T	C	A	A	G	C	T	C	A	G	C	G	C	C	A	T	C				G	G	G	A	T	C	C		A
HAP4b	IRIS 313-11629	LATIJHABAR::IRGC 61991-1::[IRIS 313-11629]	IRGC 127554	aus	I		De novo assembled	G	C	C	C	G	C	A	A	G	G	G	T	G	T	C	A	A	G	C	T	C	A	G	C	G	C	C	A	T	C				G	G	G	A	T	C	C		A
HAP4b	IRIS 313-11181	TAMBA PERAK::IRGC 35534-2::[IRIS 313-11181]	IRGC 128179	ind3	I		De novo assembled	G	C	C	C	G	C	A	A	G	G	G	T	G	T	C	A	A	G	C	T	C	A	G	C	G	C	C	A	T	C				G	G	G	A	T	C	C		A
HAP4b	IRIS 313-11005	PULU LOTONG::IRGC 27380-2::[IRIS 313-11005]	IRGC 128140	trop	I		De novo assembled	G	C	C	C	G	C	A	A	G	G	G	T	G	T	C	A	A	G	C	T	C	A	G	C	G	C	C	A	T	C				G	G	G	A	T	C	C		A
HAP4b	IRIS 313-10974	KAMRANGA::IRGC 26373-2::[IRIS 313-10974]	IRGC 128070	ind2	I		De novo assembled	G	C	C	C	G	C	A	A	G	G	G	T	G	T	C	A	A	G	C	T	C	A	G	C	G	C	C	A	T	C				G	G	G	A	T	C	C		A
HAP4b	IRIS 313-11876	AI DA::IRGC 72567-1::[IRIS 313-11876]	IRGC 127113	ind1A	Not assigned		De novo assembled	G	C	C	C	G	C	A	A	G	G	G	T	G	T	C	A	A	G	C	T	C	A	G	C	G	C	C	A	T	C				G	G	G	A	T	C	C		A
HAP4b	IRIS 313-10134	PIN GAEW 56::IRGC 7887-1::[IRIS 313-10134]	IRGC 125871	ind3	H		De novo assembled	G	C	C	C	G	C	A	A	G	G	G	T	G	T	C	A	A	G	C	T	C	A	G	C	G	C	C	A	T	C				G	G	G	A	T	C	C		A
HAP4b	IRIS 313-12297	LOUK PASOM::IRGC 98136-1::[IRIS 313-12297]	IRGC 127576	indx	Not assigned		De novo assembled	G	C	C	C	G	C	A	A	G	G	G	T	G	T	C	A	A	G	C	T	C	A	G	C	G	C	C	A	T	C				G	G	G	A	T	C	C		A
HAP4b	IRIS 313-10881	ARC 12413::IRGC 22044-1::[IRIS 313-10881]	IRGC 128223	admix	Not assigned		De novo assembled	G	C	C	C	G	C	A	A	G	G	G	T	G	T	C	A	A	G	C	T	C	A	G	C	G	C	C	A	T	C				G	G	G	A	T	C	C		A
HAP4b	IRIS 313-12246	BANGKOUY::IRGC 94037-1::[IRIS 313-12246]	IRGC 127208	ind3	H		De novo assembled	G	C	C	C	G	C	A	A	G	G	G	T	G	T	C	A	A	G	C	T	C	A	G	C	G	C	C	A	T	C				G	G	G	A	T	C	C		A
HAP4b	IRIS 313-10762	BANDI::IRGC 17214-1::[IRIS 313-10762]	IRGC 127207	ind3	H		De novo assembled	G	C	C	C	G	C	A	A	G	G	G	T	G	T	C	A	A	G	C	T	C	A	G	C	G	C	C	A	T	C				G	G	G	A	T	C	C		A
HAP4b	IRIS 313-11894	LOC TRANG MUON::IRGC 73216-1::[IRIS 313-11894]	IRGC 128368	indx	Not assigned		De novo assembled	G	C	C	C	G	C	A	A	G	G	G	T	G	T	C	A	A	G	C	T	C	A	G	C	G	C	C	A	T	C				G	G	G	A	T	C	C		A
HAP4b	IRIS 313-9767	CI 9445::IRGC 2081-1::[IRIS 313-9767]	IRGC 125711	indx	Not assigned		De novo assembled	G	C	C	C	G	C	A	A	G	G	G	T	G	T	C	A	A	G	C	T	C	A	G	C	G	C	C	A	T	C				G	G	G	A	T	C	C		A
HAP4b	IRIS 313-11762	NS 1515::IRGC 68947-1::[IRIS 313-11762]	IRGC 127682	ind2	H		De novo assembled	G	C	C	C	G	C	A	A	G	G	G	T	G	T	C	A	A	G	C	T	C	A	G	C	G	C	C	A	T	C				G	G	G	A	T	C	C		A
HAP4b	IRIS 313-11534	NAHNG KHAO BOW::IRGC 57377-1::[IRIS 313-11534]		ind3	H		De novo assembled	G	C	C	C	G	C	A	A	G	G	G	T	G	T	C	A	A	G	C	T	C	A	G	C	G	C	C	A	T	C				G	G	G	A	T	C	C		A
HAP4b	IRIS 313-11417	LAWANGAI::IRGC 49850-2::[IRIS 313-11417]	IRGC 132256	admix	D_2		De novo assembled	G	C	C	C	G	C	A	A	G	G	G	T	G	T	C	A	A	G	C	T	C	A	G	C	G	C	C	A	T	C				G	G	G	A	T	C	C		A
HAP4b	IRIS 313-12121	CHA LIENG::IRGC 84920-1::[IRIS 313-12121]	IRGC 127254	ind3	Not assigned		De novo assembled	G	C	C	C	G	C	A	A	G	G	G	T	G	T	C	A	A	G	C	T	C	A	G	C	G	C	C	A	T	C				G	G	G	A	T	C	C		A
HAP4b	IRIS 313-11079	PHAN PHAE::IRGC 29652-2::[IRIS 313-11079]	IRGC 128132	ind3	Not assigned		De novo assembled	G	C	C	C	G	C	A	A	G	G	G	T	G	T	C	A	A	G	C	T	C	A	G	C	G	C	C	A	T	C				G	G	G	A	T	C	C		A
HAP4b	IRIS 313-11731	QING TAI AI::IRGC 67273-1::[IRIS 313-11731]	IRGC 127754	indx	Not assigned	sd1	De novo assembled	G	C	C	C	G	C	A	A	G	G	G	T	G	T	C	A	A	G	C	T	C	A	G	C	G	C	C	A	T	C				G	G	G	A	T	C	C		A
HAP4b	IRIS 313-10178	GAO JIAO BAI::IRGC 68047-1::[IRIS 313-10178]	IRGC 125748	ind1A	Not assigned		De novo assembled	G	C	C	C	G	C	A	A	G	G	G	T	G	T	C	A	A	G	C	T	C	A	G	C	G	C	C	A	T	C				G	G	G	A	T	C	C		A
HAP4b	IRIS 313-11948	HOU LU BAI::IRGC 76582-1::[IRIS 313-11948]	IRGC 127417	ind1A	Not assigned		De novo assembled	G	C	C	C	G	C	A	A	G	G	G	T	G	T	C	A	A	G	C	T	C	A	G	C	G	C	C	A	T	C				G	G	G	A	T	C	C		A
HAP4b	IRIS 313-11235	PINILING DANIEL::IRGC 38828-2::[IRIS 313-11235]	IRGC 128137	indx	Not assigned		De novo assembled	G	C	C	C	G	C	A	A	G	G	G	T	G	T	C	A	A	G	C	T	C	A	G	C	G	C	C	A	T	C				G	G	G	A	T	C	C		A
HAP4b	IRIS 313-10996	BAKASI::IRGC 27074-1::[IRIS 313-10996]	IRGC 127204	indx	I		De novo assembled	G	C	C	C	G	C	A	A	G	G	G	T	G	T	C	A	A	G	C	T	C	A	G	C	G	C	C	A	T	C				G	G	G	A	T	C	C		A
HAP4b	B221	FANHAOPI::[B221]		ind1A	I		De novo assembled	G	C	C	C	G	C	A	A	G	G	G	T	G	T	C	A	A	G	C	T	C	A	G	C	G	C	C	A	T	C				G	G	G	A	T	C	C		A
HAP4b	B164	QINGKE::[B164]		aus	I		De novo assembled	G	C	C	C	G	C	A	A	G	G	G	T	G	T	C	A	A	G	C	T	C	A	G	C	G	C	C	A	T	C				G	G	G	A	T	C	C		A
HAP4b	IRIS 313-11208	PARIJAT::IRGC 37272-2::[IRIS 313-11208]	IRGC 128129	indx	I		De novo assembled	G	C	C	C	G	C	A	A	G	G	G	T	G	T	C	A	A	G	C	T	C	A	G	C	G	C	C	A	T	C				G	G	G	A	T	C	C		A
HAP4b	CX53	JIANGXISIMIAO::[CX53]	IRGC 135954	indx	I	sd1	De novo assembled	G	C	C	C	G	C	A	A	G	G	G	T	G	T	C	A	A	G	C	T	C	A	G	C	G	C	C	A	T	C				G	G	G	A	T	C	C		A
HAP4b	IRIS 313-10771	GOGO RAJAPAN::IRGC 17666-2::[IRIS 313-10771]		trop	I		De novo assembled	G	C	C	C	G	C	A	A	G	G	G	T	G	T	C	A	A	G	C	T	C	A	G	C	G	C	C	A	T	C				G	G	G	A	T	C	C		A
HAP4b	B141	GENG 7623::[B141]		admix	I		De novo assembled	G	C	C	C	G	C	A	A	G	G	G	T	G	T	C	A	A	G	C	T	C	A	G	C	G	C	C	A	T	C				G	G	G	A	T	C	C		A
HAP4b	B139	IR 661-1::[B139]		indx	H		De novo assembled	G	C	C	C	G	C	A	A	G	G	G	T	G	T	C	A	A	G	C	T	C	A	G	C	G	C	C	A	T	C				G	G	G	A	T	C	C		A
HAP4b	IRIS 313-11766	TSIMIAKABIJA::IRGC 69074-1::[IRIS 313-11766]	IRGC 128490	admix	H		De novo assembled	G	C	C	C	G	C	A	A	G	G	G	T	G	T	C	A	A	G	C	T	C	A	G	C	G	C	C	A	T	C				G	G	G	A	T	C	C		A
HAP4b	IRIS 313-10576	BAANYALOJOPOIHUN::IRGC 7928-2::[IRIS 313-10576]	IRGC 127979	ind2	H		De novo assembled	G	C	C	C	G	C	A	A	G	G	G	T	G	T	C	A	A	G	C	T	C	A	G	C	G	C	C	A	T	C				G	G	G	A	T	C	C		A
HAP4b	IRIS 313-8822	STRAW 23-400::IRGC 38390-1::[IRIS 313-8822]		aus	Not assigned		De novo assembled	G	C	C	C	G	C	A	A	G	G	G	T	G	T	C	A	A	G	C	T	C	A	G	C	G	C	C	A	T	C				G	G	G	A	T	C	C		A
HAP4b	B058	ERJIUNAN 1::[B058]		ind1B	Not assigned	sd1	De novo assembled	G	C	C	C	G	C	A	A	G	G	G	T	G	T	C	A	A	G	C	T	C	A	G	C	G	C	C	A	T	C				G	G	G	A	T	C	C		A
HAP4b	IRIS 313-11889	MURGI BRINJ::IRGC 73109-1::[IRIS 313-11889]	IRGC 127639	indx	A_7		De novo assembled	G	C	C	C	G	C	A	A	G	G	G	T	G	T	C	A	A	G	C	T	C	A	G	C	G	C	C	A	T	C				G	G	G	A	T	C	C		A
HAP4b	IRIS 313-11548	TAUNG LWIN::IRGC 58222-1::[IRIS 313-11548]	IRGC 127850	indx	I		De novo assembled	G	C	C	C	G	C	A	A	G	G	G	T	G	T	C	A	A	G	C	T	C	A	G	C	G	C	C	A	T	C				G	G	G	A	T	C	C		A
HAP4b	IRIS 313-10614	HAM MOON::IRGC 9135-2::[IRIS 313-10614]	IRGC 128049	indx	Not assigned		De novo assembled	G	C	C	C	G	C	A	A	G	G	G	T	G	T	C	A	A	G	C	T	C	A	G	C	G	C	C	A	T	C				G	G	G	A	T	C	C		A
HAP4b	IRIS 313-9317	VEN THAP::IRGC 56138-1::[IRIS 313-9317]	IRGC 125933	indx	Not assigned		De novo assembled	G	C	C	C	G	C	A	A	G	G	G	T	G	T	C	A	A	G	C	T	C	A	G	C	G	C	C	A	T	C				G	G	G	A	T	C	C		A
HAP4b	IRIS 313-11344	SAMON::IRGC 44735-2::[IRIS 313-11344]	IRGC 128157	ind3	Not assigned		De novo assembled	G	C	C	C	G	C	A	A	G	G	G	T	G	T	C	A	A	G	C	T	C	A	G	C	G	C	C	A	T	C				G	G	G	A	T	C	C		A
HAP4b	IRIS 313-7668	DANAU LAUT TAWAR::C1::[IRIS 313-7668]	IRGC 122029	indx	D_2		De novo assembled	G	C	C	C	G	C	A	A	G	G	G	T	G	T	C	A	A	G	C	T	C	A	G	C	G	C	C	A	T	C				G	G	G	A	T	C	C		A
HAP4b	B197	TAIZHONGXIANXUAN 2::[B197]		ind1A	I		De novo assembled	G	C	C	C	G	C	A	A	G	G	G	T	G	T	C	A	A	G	C	T	C	A	G	C	G	C	C	A	T	C				G	G	G	A	T	C	C		A
HAP4b	IRIS 313-10796	MOLOG::IRGC 18282-1::[IRIS 313-10796]	IRGC 128390	trop	I		De novo assembled	G	C	C	C	G	C	A	A	G	G	G	T	G	T	C	A	A	G	C	T	C	A	G	C	G	C	C	A	T	C				G	G	G	A	T	C	C		A
HAP4b	IRIS 313-8703	DA 7::[IRIS 313-8703]	IRGC 124432	ind2	Not assigned		De novo assembled	G	C	C	C	G	C	A	A	G	G	G	T	G	T	C	A	A	G	C	T	C	A	G	C	G	C	C	A	T	C				G	G	G	A	T	C	C		A
HAP4b	B020	JINEIYADAO::[B020]	IRGC 135958	admix	Not assigned		De novo assembled	G	C	C	C	G	C	A	A	G	G	G	T	G	T	C	A	A	G	C	T	C	A	G	C	G	C	C	A	T	C				G	G	G	A	T	C	C		A
HAP4b	B227	MENJIAGAO 1::[B227]		indx	Not assigned		De novo assembled	G	C	C	C	G	C	A	A	G	G	G	T	G	T	C	A	A	G	C	T	C	A	G	C	G	C	C	A	T	C				G	G	G	A	T	C	C		A
HAP4b	IRIS 313-10896	ARC 13276::IRGC 22622-2::[IRIS 313-10896]	IRGC 127946	admix	Not assigned		De novo assembled	G	C	C	C	G	C	A	A	G	G	G	T	G	T	C	A	A	G	C	T	C	A	G	C	G	C	C	A	T	C				G	G	G	A	T	C	C		A
HAP4b	B021	SELN 244A6-20::[B021]	IRGC 136044	indx	I		De novo assembled	G	C	C	C	G	C	A	A	G	G	G	T	G	T	C	A	A	G	C	T	C	A	G	C	G	C	C	A	T	C				G	G	G	A	T	C	C		A
HAP4b	IRIS 313-11476	KALIPINCH::IRGC 53271-1::[IRIS 313-11476]	IRGC 128329	aus	I		De novo assembled	G	C	C	C	G	C	A	A	G	G	G	T	G	T	C	A	A	G	C	T	C	A	G	C	G	C	C	A	T	C				G	G	G	A	T	C	C		A
HAP4b	IRIS 313-11500	SKK::IRGC 54356-1::[IRIS 313-11500]	IRGC 127816	ind2	A_1		De novo assembled	G	C	C	C	G	C	A	A	G	G	G	T	G	T	C	A	A	G	C	T	C	A	G	C	G	C	C	A	T	C				G	G	G	A	T	C	C		A
HAP4b	B137	80B::[B137]		indx	Not assigned		De novo assembled	G	C	C	C	G	C	A	A	G	G	G	T	G	T	C	A	A	G	C	T	C	A	G	C	G	C	C	A	N	C				G	G	G	A	T	C	C		A
HAP4b	IRGC109232			ind			RGHUB/NCBI					G	C	A	A	G	G		T	G	T		A	A	G	C	T		A	G	C	G	C	C	A	T	C	A	A	G	G	G	G	A	T	C	C	C	A
HAP4b	Tetep_CM01			ind			RGHUB/NCBI					G	C	A	A	G	G		T	G	T		A	A	G	C	T		A	G	C	G	C	C	A	T	C	A	A	G	G	G	G	A	T	C	C	C	A
HAP4b	PA64s_CM03			ind			RGHUB/NCBI					G	C	A	A	G	G		T	G	T		A	A	G	C	T		A	G	C	G	C	C	A	T	C	A	A	G	G	G	G	A	T	C	C	C	A
HAP4b	IRGC53418_			ind			RGHUB/NCBI					G	C	A	A	G	G		T	G	T		A	A	G	C	T		A	G	C	G	C	C	A	T	C	A	A	G	G	G	G	A	T	C	C	C	A
HAP4b	IRIS 313-9969	PUTTU NELLU::IRGC 55346-1::[IRIS 313-9969]	IRGC 126989	indx			SNPseek				C	G	C	A	A	G	G	G	T	G		C	A	A	G	C	T	C	A	G	C	G		C	A	T	C				G	G	G	A	T	C	C		A
HAP4b	IRIS 313-8324	POENOET HITAM::IRGC 8193-1::[IRIS 313-8324]	IRGC 121474	admix			SNPseek				C	G	C	A	A	G	G	G	T	G		C	A	A	G	C	T	C	A	G	C	G		C	A	T	C				G	G	G	A	T	C	C		A
HAP4b	IRIS 313-8342	KURULU WEE (WHITE)::IRGC 66518-1::[IRIS 313-8342]	IRGC 121029	aus			SNPseek				C	G	C	A	A	G	G	G	T	G		C	A	A	G	C	T	C	A	G	C	G		C	A	T	C				G	G	G	A	T	C	C		A
HAP4b	IRIS 313-9818	C 1 6-5-2::IRGC 10669-1::[IRIS 313-9818]	IRGC 126147	admix			SNPseek				C	G	C	A	A	G	G	G	T	G		C	A	A	G	C	T	C	A	G		G		C	A	T	C				G	G	G	A	T	C	C		A
HAP4b	IRIS 313-8903	BPI 76 NON SENSITIVE (GREEN)::IRGC 9790-1::[IRIS 313-8903]	IRGC 120902	ind3			SNPseek				C	G	C	A	A	G	G	G	T	G		C	A	A	G	C	T	C	A	G	C	G		C	A	T	C				G	G	G	A	T	C	C		A
HAP4b	IRIS 313-9044	IR 2071-586-5-6-3::IRGC 39291-1::[IRIS 313-9044]	IRGC 125971	ind1B		sd1	SNPseek				C	G	C	A	A	G	G	G	T	G		C	A	A	G	C	T	C	A	G	C	G		C	A	T	C				G	G	G	A	T	C	C		A
HAP4b	IRIS 313-9314	KAAKARAN::IRGC 27138-1::[IRIS 313-9314]		indx			SNPseek				C	G	C	A	A	G	G	G	T	G		C	A	A	G	C	T	C	A	G	C	G		C	A	T	C				G	G	G	A	T	C	C		A
HAP4b	IRIS 313-10274	ICTA CRISPO 38::IRGC 116994-1::[IRIS 313-10274]	IRGC 125967	ind1B		sd1	SNPseek				C	G	C	A	A	G	G	G	T	G		C	A	A	G	C	T	C	A	G	C	G		C	A	T	C				G	G	G	A	T	C	C		A
HAP4b	IRIS 313-10349	CSR-90 IR-2::IRGC 117327-1::[IRIS 313-10349]	IRGC 120921	indx			SNPseek				C	G	C	A	A	G	G	G	T	G		C	A	A	G	C	T	C	A	G	C	G		C	A	T	C				G	G	G	A	T	C	C		A
HAP4b	IRIS 313-8450	498-2A BR 8::IRGC 5891-1::[IRIS 313-8450]	IRGC 126041	ind2			SNPseek				C	G	C	A	A	G	G	G	T	G		C	A	A	G	C	T	C	A	G	C	G		C	A	T	C				G	G	G	A	T	C	C		A
HAP4b	IRIS 313-8474	PAH WEAN::IRGC 78276-1::[IRIS 313-8474]	IRGC 126258	ind3			SNPseek				C	G	C	A	A	G	G	G	T	G		C	A	A	G	C	T	C	A	G	C	G		C	A		C				G	G	G	A	T	C	C		A
HAP4b	IRIS 313-8509	PUILLIPINA KATARI::IRGC 77293-1::[IRIS 313-8509]	IRGC 126261	ind2			SNPseek				C	G	C	A	A	G	G	G	T	G		C	A	A	G	C	T	C	A	G	C	G		C	A	T	C				G	G	G	A	T	C	C		A
HAP4b	IRIS 313-8717	BAZAIL::IRGC 27526-1::[IRIS 313-8717]	IRGC 126184	indx			SNPseek				C	G	C	A	A	G	G	G	T	G		C	A	A	G	C	T	C	A	G	C	G		C	A	T	C				G	G	G	A	T	C	C		A
HAP4b	IRIS 313-8732	WP 36::IRGC 55278-1::[IRIS 313-8732]	IRGC 126092	ind1B		sd1	SNPseek				C	G	C	A	A	G	G	G	T	G		C	A	A	G	C	T	C	A	G	C	G		C	A	T	C				G	G	G	A	T	C	C		A
HAP4b	IRIS 313-8935	ARC 18061::IRGC 47650-1::[IRIS 313-8935]	IRGC 127034	indx			SNPseek				C	G	C	A	A	G	G	G	T	G		C	A	A	G	C	T	C	A	G	C	G		C	A	T	C				G	G	G	A	T	C	C		A
HAP4b	IRIS 313-8996	SRAU SENG::IRGC 30290-1::[IRIS 313-8996]	IRGC 126169	ind3			SNPseek				C	G	C	A	A	G	G	G	T	G		C	A	A	G	C	T	C	A	G	C	G		C	A	T	C				G	G	G	A	T	C	C		A
HAP4b	IRIS 313-9032	KHAO GRADOOK CHAHNG::IRGC 17111-1::[IRIS 313-9032]	IRGC 125800	ind1B		sd1	SNPseek				C	G	C	A	A	G	G	G	T	G		C	A	A	G	C	T	C	A	G	C	G		C	A	T	C				G	G	G	A	T	C	C		A
HAP4b	IRIS 313-9227	WP 65::IRGC 36526-1::[IRIS 313-9227]	IRGC 126013	ind1B		sd1	SNPseek				C	G	C	A	A	G	G	G	T	G		C	A	A	G	C	T	C	A	G	C	G		C	A	T	C				G	G	G	A	T	C	C		A
HAP4b	IRIS 313-9348	BK 26::IRGC 45197-1::[IRIS 313-9348]	IRGC 125684	ind2			SNPseek				C	G	C	A	A	G	G	G	T	G		C	A	A	G	C	T	C	A	G	C	G		C	A		C				G	G	G	A	T	C	C		A
HAP4b	IRIS 313-9433	GOKULGANJA::IRGC 45701-1::[IRIS 313-9433]	IRGC 126151	ind2			SNPseek				C	G	C	A	A	G	G	G	T	G		C	A	A	G	C	T	C	A	G	C	G		C	A	T	C				G	G	G	A	T	C	C		A
HAP4b	IRIS 313-9560	ARC 11857::IRGC 40972-1::[IRIS 313-9560]	IRGC 125643	indx			SNPseek				C	G	C	A	A	G	G	G	T	G		C	A	A	G	C	T	C	A	G	C	G		C	A	T	C				G	G	G	A	T	C	C		A
HAP4b	IRIS 313-9590	KETAN SERANG::IRGC 14615-1::[IRIS 313-9590]	IRGC 125799	ind3			SNPseek				C	G	C	A	A	G	G	G	T	G		C	A	A	G	C	T	C	A	G	C	G		C	A	T	C				G	G	G	A	T	C	C		A
HAP4b	IRIS 313-9593	ARC 15088::IRGC 41934-1::[IRIS 313-9593]	IRGC 125651	indx			SNPseek				C	G	C	A	A	G	G	G	T	G		C	A	A	G	C	T	C	A	G	C	G		C	A	T	C				G	G	G	A	T	C	C		A
HAP4b	IRIS 313-9605	NCS 194::IRGC 51932-1::[IRIS 313-9605]	IRGC 125852	ind1A			SNPseek				C	G	C	A	A	G	G	G	T	G		C	A	A	G	C	T	C	A	G	C	G		C	A	T	C				G	G	G	A	T	C	C		A
HAP4b	IRIS 313-9669	KAMPAI PEUN MEUANG::IRGC 78248-1::[IRIS 313-9669]		ind3			SNPseek				C	G	C	A	A	G	G	G	T	G		C	A	A	G	C	T	C	A	G	C	G		C	A	T	C				G	G	G	A	T	C	C		A
HAP4b	IRIS 313-9795	HD 10::IRGC 6638-1::[IRIS 313-9795]	IRGC 125759	ind2			SNPseek				C	G	C	A	A	G	G	G	T	G		C	A	A	G	C	T	C	A	G	C	G		C	A	T	C				G	G	G	A	T	C	C		A
HAP4b	IRIS 313-9822	CRILLO LA FRIA::IRGC 10793-1::[IRIS 313-9822]	IRGC 125716	ind1A			SNPseek				C	G	C	A	A	G	G	G	T	G		C	A	A	G	C	T	C	A	G	C	G		C	A	T	C				G	G	G	A	T	C	C		A
HAP4b	IRIS 313-9968	KULA KARUPPAN::IRGC 55328-1::[IRIS 313-9968]	IRGC 125810	indx			SNPseek				C	G	C	A	A	G	G	G	T	G		C	A	A	G	C	T	C	A	G	C	G		C	A	T	C				G	G	G	A	T	C	C		A
HAP4b	IRIS 313-10007	GARURA::IRGC 64111-1::[IRIS 313-10007]	IRGC 125749	indx			SNPseek				C	G	C	A	A	G	G	G	T	G		C	A	A	G	C	T	C	A	G	C	G		C	A	T	C				G	G	G	A	T	C	C		A
HAP4b	IRIS 313-10010	LALKA (LAL DHAN)::IRGC 64946-1::[IRIS 313-10010]	IRGC 125818	ind2			SNPseek				C	G	C	A	A	G	G	G	T	G		C	A	A	G	C	T	C	A	G	C	G		C	A	T	C				G	G	G	A	T	C	C		A
HAP4b	IRIS 313-10035	RIZ TYPE SORGHO::IRGC 69015-1::[IRIS 313-10035]	IRGC 125887	ind2			SNPseek				C	G	C	A	A	G	G	G	T	G		C	A	A	G	C	T	C	A	G	C	G		C	A	T	C				G	G	G	A	T	C	C		A
HAP4b	IRIS 313-10050	TSIMATAHOPAOSA::IRGC 69884-1::[IRIS 313-10050]	IRGC 127091	indx			SNPseek				C	G	C	A	A	G	G	G	T	G		C	A	A	G	C	T	C	A	G	C	G		C	A	T	C				G	G	G	A	T	C	C		A
HAP4b	IRIS 313-10103	DALSUNG 41::IRGC 79385-1::[IRIS 313-10103]	IRGC 125721	indx			SNPseek				C	G	C	A	A	G	G	G	T	G		C	A	A	G	C	T	C	A	G	C	G		C	A	T	C				G	G	G	A	T	C	C		A
HAP4b	IRIS 313-10190	DENG DENG QI::IRGC 72036-1::[IRIS 313-10190]	IRGC 125726	ind1A			SNPseek				C	G	C	A	A	G	G	G	T	G		C	A	A	G	C	T	C	A	G	C	G		C	A	T	C				G	G	G	A	T	C	C		A
HAP4b	IRIS 313-10307	INIAP 6::IRGC 117002-1::[IRIS 313-10307]	IRGC 127050	indx		sd1	SNPseek				C	G	C	A	A	G	G	G	T	G		C	A	A	G	C	T	C	A	G	C	G		C	A	T	C				G	G	G	A	T	C	C		A
HAP4b	IRIS 313-10385	IR 75870-5-8-5-B-1::IRGC 117297-1::[IRIS 313-10385]	IRGC 126062	ind1B		sd1	SNPseek				C	G	C	A	A	G	G	G	T	G		C	A	A	G	C	T	C	A	G	C	G		C	A	T	C				G	G	G	A	T	C	C		A
HAP4b	IRIS 313-8332	ARC 15091::IRGC 43048-1::[IRIS 313-8332]	IRGC 126298	indx			SNPseek				C	G	C	A	A	G	G	G	T	G		C	A	A	G	C	T	C	A	G	C	G		C	A	T	C				G	G	G	A	T	C	C		A
HAP4b	IRIS 313-8606	AC 13 (T 141)::IRGC 5456-1::[IRIS 313-8606]	IRGC 131926	ind3			SNPseek				C	G	C	A	A	G	G	G	T	G		C	A	A	G	C	T	C	A	G	C	G		C	A	T	C				G	G	G	A	T	C	C		A
HAP4b	IRIS 313-8638	Na souan::IRGC 11889-1::[IRIS 313-8638]	IRGC 126250	ind3			SNPseek				C	G	C	A	A	G	G	G	T	G		C	A	A	G	C	T	C	A	G	C	G		C	A	T	C				G	G	G	A	T	C	C		A
HAP4b	IRIS 313-9156	DHOLA AMAN (LOWLAND AMAN)::IRGC 8341-1::[IRIS 313-9156]	IRGC 126200	ind2			SNPseek				C	G	C	A	A	G	G	G	T	G		C	A	A	G	C	T	C	A	G	C	G		C	A	T	C				G	G	G	A	T	C	C		A
HAP4b	IRIS 313-9160	THIERNO BANDE::IRGC 16009-1::[IRIS 313-9160]	IRGC 125922	ind3			SNPseek				C	G	C	A	A	G	G	G	T	G		C	A	A	G	C	T	C	A	G	C	G		C	A	T	C				G	G	G	A	T	C	C		A
HAP4b	IRIS 313-9273	RADEN SAWO 1::IRGC 57578-1::[IRIS 313-9273]		ind3			SNPseek				C	G	C	A	A	G	G	G	T	G		C	A	A	G	C	T	C	A	G	C	G		C	A	T	C				G	G	G	A	T	C	C		A
HAP4b	IRIS 313-10287	UQUIHUA::IRGC 117037-1::[IRIS 313-10287]	IRGC 127068	ind1B		sd1	SNPseek				C	G	C	A	A	G	G	G	T	G		C	A	A	G	C	T	C	A	G	C	G		C	A	T	C				G	G	G	A	T	C	C		A
HAP4b	IRIS 313-8291	KEDOT::IRGC 66568-1::[IRIS 313-8291]		ind3			SNPseek				C	G	C	A	A	G	G	G	T	G		C	A	A	G	C	T	C	A	G	C	G		C	A	T	C				G	G	G	A	T	C	C		A
HAP4b	IRIS 313-8293	SAGNADE::IRGC 15801-1::[IRIS 313-8293]	IRGC 132432	ind3			SNPseek				C	G	C	A	A	G	G	G	T	G		C	A	A	G	C	T	C	A	G	C	G		C	A	T	C				G	G	G	A	T	C	C		A
HAP4b	IRIS 313-8312	BATU::IRGC 71508-1::[IRIS 313-8312]	IRGC 131932	ind3			SNPseek				C	G	C	A	A	G	G	G	T	G		C	A	A	G	C	T	C	A	G	C	G		C	A	T	C				G	G	G	A	T	C	C		A
HAP4b	IRIS 313-8386	ARC 10812::IRGC 21074-1::[IRIS 313-8386]	IRGC 126173	indx			SNPseek				C	G	C	A	A	G	G	G	T	G		C	A	A	G	C	T	C	A	G	C	G		C	A	T	C				G	G	G	A	T	C	C		A
HAP4b	IRIS 313-8407	NACHIN ER 12::IRGC 14146-1::[IRIS 313-8407]		ind3			SNPseek				C	G	C	A	A	G	G	G	T	G		C	A	A	G	C	T	C	A	G	C	G		C	A	T	C				G	G	G	A	T	C	C		A
HAP4b	IRIS 313-8468	LEONG ORN 4135::IRGC 14087-1::[IRIS 313-8468]	IRGC 126233	ind3			SNPseek				C	G	C	A	A	G	G	G	T	G		C	A	A	G	C	T	C	A	G	C	G		C	A	T	C				G	G	G	A	T	C	C		A
HAP4b	IRIS 313-8493	MELABOH::IRGC 66597-1::[IRIS 313-8493]	IRGC 128537	ind3			SNPseek				C	G	C	A	A	G	G	G	T	G		C	A	A	G	C	T	C	A	G	C	G		C	A	T	C				G	G	G	A	T	C	C		A
HAP4b	IRIS 313-8557	SERENDAH SUNGAI DUA 25::IRGC 13892-1::[IRIS 313-8557]	IRGC 131956	ind3			SNPseek				C	G	C	A	A	G	G	G	T	G		C	A	A	G	C	T	C	A	G	C	G		C	A	T	C				G	G	G	A	T	C	C		A
HAP4b	IRIS 313-8643	DAJA::IRGC 17440-1::[IRIS 313-8643]	IRGC 131935	ind3			SNPseek				C	G	C	A	A	G	G	G	T	G		C	A	A	G	C	T	C	A	G	C	G		C	A	T	C				G	G	G	A	T	C	C		A
HAP4b	IRIS 313-8681	KOLITONDO::IRGC 66497-1::[IRIS 313-8681]		ind3			SNPseek				C	G	C	A	A	G	G	G	T	G		C	A	A	G	C	T	C	A	G	C	G		C	A	T	C				G	G	G	A	T	C	C		A
HAP4b	IRIS 313-8683	JOTA BITCHI 1::IRGC 77253-1::[IRIS 313-8683]	IRGC 135532	ind2			SNPseek				C	G	C	A	A	G	G	G	T	G		C	A	A	G	C	T	C	A	G	C	G		C	A	T	C				G	G	G	A	T	C	C		A
HAP4b	IRIS 313-8751	HNANWA::IRGC 33118-1::[IRIS 313-8751]	IRGC 126209	ind3			SNPseek				C	G	C	A	A	G	G	G	T	G		C	A	A	G	C	T	C	A	G	C	G		C	A	T	C				G	G	G	A	T	C	C		A
HAP4b	IRIS 313-8767	SIDIK::IRGC 66643-1::[IRIS 313-8767]		ind3			SNPseek				C	G	C	A	A	G	G	G	T	G		C	A	A	G	C	T	C	A	G	C	G		C	A	T	C				G	G	G	A	T	C	C		A
HAP4b	IRIS 313-8833	SIMET 2::IRGC 25734-1::[IRIS 313-8833]	IRGC 126142	ind3			SNPseek				C	G	C	A	A	G	G	G	T	G		C	A	A	G	C	T	C	A	G	C	G		C	A	T	C				G	G	G	A	T	C	C		A
HAP4b	IRIS 313-8978	IE MATA CICEM::IRGC 66562-1::[IRIS 313-8978]		ind3			SNPseek				C	G	C	A	A	G	G	G	T	G		C	A	A	G	C	T	C	A	G	C	G		C	A	T	C				G	G	G	A	T	C	C		A
HAP4b	IRIS 313-9054	BIDAPIK::IRGC 43354-1::[IRIS 313-9054]	IRGC 131933	ind3			SNPseek				C	G	C	A	A	G	G	G	T	G		C	A	A	G	C	T	C	A	G	C	G		C	A	T	C				G	G	G	A	T	C	C		A
HAP4b	IRIS 313-9131	DOC PHUNG D 12::IRGC 10234-1::[IRIS 313-9131]	IRGC 135749	ind3			SNPseek				C	G	C	A	A	G	G	G	T	G		C	A	A	G	C	T	C	A	G	C	G		C	A	T	C				G	G	G	A	T	C	C		A
HAP4b	IRIS 313-9188	TUMBA::IRGC 66681-1::[IRIS 313-9188]	IRGC 126288	ind3			SNPseek				C	G	C	A	A	G	G	G	T	G		C	A	A	G	C	T	C	A	G	C	G		C	A	T	C				G	G	G	A	T	C	C		A
HAP4b	IRIS 313-9329	KERITING TINGGI::IRGC 19972-1::[IRIS 313-9329]	IRGC 131941	ind3			SNPseek				C	G	C	A	A	G	G	G	T	G		C	A	A	G	C	T	C	A	G	C	G		C	A	T	C				G	G	G	A	T	C	C		A
HAP4b	IRIS 313-9360	BHASAMANIK::IRGC 46954-1::[IRIS 313-9360]		ind2			SNPseek				C	G	C	A	A	G	G	G	T	G		C	A	A	G	C	T	C	A	G	C	G		C	A	T	C				G	G	G	A	T	C	C		A
HAP4b	IRIS 313-9944	SOLOMON RED RICE::IRGC 50950-1::[IRIS 313-9944]	IRGC 126312	indx			SNPseek				C	G	C	A	A	G	G	G	T	G		C	A	A	G	C	T	C	A	G	C	G		C	A	T	C				G	G	G	A	T	C	C		A
HAP4b	IRIS 313-10298	3210::IRGC 116950-1::[IRIS 313-10298]	IRGC 127030	ind1B		sd1	SNPseek				C	G	C	A	A	G	G	G	T	G		C	A	A	G	C	T	C	A	G	C	G		C	A		C				G	G	G	A	T	C	C		A
HAP4b	IRIS 313-10340	BR 4973-34-6-6::IRGC 117317-1::[IRIS 313-10340]	IRGC 127040	indx			SNPseek				C	G	C	A	A	G	G	G	T	G		C	A	A	G	C	T	C	A	G	C	G		C	A	T	C				G	G	G	A	T	C	C		A
HAP4b	IRIS 313-9062	MAE MAI LUD NI::IRGC 66065-1::[IRIS 313-9062]	IRGC 125831	ind3			SNPseek				C	G	C	A	A	G	G	G	T	G		C	A	A	G	C	T	C	A	G	C	G		C	A	T	C				G	G	G	A	T	C	C		A
HAP4b	IRIS 313-10380	IR 73690-7-2-1-1-3-2-2-1::IRGC 117384-1::[IRIS 313-10380]	IRGC 125981	aus			SNPseek				C	G	C	A	A	G	G	G	T	G		C	A	A	G	C	T	C	A	G	C	G		C	A	T	C				G	G	G	A	T	C	C		A
HAP4b	IRIS 313-10077	TAMASHIRO HIKARI::IRGC 74534-1::[IRIS 313-10077]	IRGC 125917	indx			SNPseek				C	G	C	A	A	G	G	G	T	G		C	A	A	G	C	T	C	A	G	C	G		C	A	T	C				G	G	G	A	T	C	C		A
HAP4b	IRIS 313-7698	IR 57920-AC 25-2-B::C1::[IRIS 313-7698]	IRGC 122098	indx			SNPseek				C	G	C	A	A	G	G	G	T	G		C	A	A	G	C	T	C	A	G	C	G		C	A	T	C				G	G	G	A	T	C	C		A
HAP4b	IRIS 313-7696	IR 55411-50::IRTP 16682-C1::[IRIS 313-7696]	IRGC 124394	indx			SNPseek				C	G	C	A	A	G	G	G	T	G		C	A	A	G	C	T	C	A	G	C	G		C	A	T	C				G	G	G	A	T	C	C		A
HAP4b	IRIS 313-7654	BOUAKE 189::C1::[IRIS 313-7654]	IRGC 126997	ind1B			SNPseek				C	G	C	A	A	G	G	G	T	G		C	A	A	G	C	T	C	A	G	C	G		C	A	T	C				G	G	G	A	T	C	C		A
HAP4b	IRIS 313-7795	TSIPALA MENA 626::GERVEX 5392-C1::[IRIS 313-7795]	IRGC 124427	ind2			SNPseek				C	G	C	A	A	G	G	G	T	G		C	A	A	G	C	T	C	A	G	C	G		C	A	T	C				G	G	G	A	T	C	C		A
HAP4b	IRIS 313-8161	CNA 4081::GERVEX 1494-C1::[IRIS 313-8161]	IRGC 122017	ind1B		sd1	SNPseek				C	G	C	A	A	G	G	G	T	G		C	A	A	G	C	T	C	A	G	C	G		C	A	T	C				G	G	G	A	T	C	C		A
HAP4b	IRIS 313-11431	C 166-135::IRGC 50633-1::[IRIS 313-11431]	IRGC 127244	ind3			SNPseek				C	G	C	A	A	G	G	G	T	G		C	A	A	G	C	T	C	A	G	C	G		C	A	T	C				G	G	G	A	T	C	C		A
HAP4b	IRIS 313-11443	ARC 18533::IRGC 51756-1::[IRIS 313-11443]	IRGC 127161	indx			SNPseek				C	G	C	A	A	G	G	G	T	G		C	A	A	G	C	T	C	A	G	C	G		C	A	T	C				G	G	G	A	T	C	C		A
HAP4b	IRIS 313-11490	ARC 15480::IRGC 53799-1::[IRIS 313-11490]	IRGC 127160	indx			SNPseek				C	G	C	A	A	G	G	G	T	G		C	A	A	G	C	T	C	A	G	C	G		C	A	T	C				G	G	G	A	T	C	C		A
HAP4b	IRIS 313-11512	OYAK PAKANG::IRGC 55422-1::[IRIS 313-11512]	IRGC 127693	indx			SNPseek				C	G	C	A	A	G	G	G	T	G		C	A	A	G		T	C	A	G	C	G		C	A	T	C				G	G	G	A	T	C	C		A
HAP4b	IRIS 313-11541	HOE PHAR THAE::IRGC 57907-1::[IRIS 313-11541]	IRGC 127410	indx			SNPseek				C	G	C	A	A	G	G	G	T	G		C	A	A	G	C	T	C	A	G	C	G		C	A	T	C				G	G	G	A	T	C	C		A
HAP4b	IRIS 313-11521	TAN NONG::IRGC 56126-1::[IRIS 313-11521]	IRGC 127847	indx			SNPseek				C	G	C	A	A	G	G	G	T	G		C	A	A	G	C	T	C	A	G	C	G		C	A	T	C				G	G	G	A	T	C	C		A
HAP4b	IRIS 313-11616	UPRH 31::IRGC 61503-1::[IRIS 313-11616]	IRGC 127878	admix			SNPseek				C	G	C	A	A	G	G	G	T	G		C	A	A	G	C	T	C	A	G	C	G		C	A	T	C				G	G	G	A	T	C	C		A
HAP4b	IRIS 313-11617	UPRH 33::IRGC 61505-1::[IRIS 313-11617]	IRGC 128495	aus			SNPseek				C	G	C	A	A	G	G	G	T	G		C	A	A	G	C	T	C	A	G	C	G		C	A	T	C				G	G	G	A	T	C	C		A
HAP4b	IRIS 313-11620	UPRH 197::IRGC 61641-1::[IRIS 313-11620]	IRGC 127876	aus			SNPseek				C	G	C	A	A	G	G	G	T	G		C	A	A	G	C	T	C	A	G	C	G		C	A	T	C				G	G	G	A	T	C	C		A
HAP4b	IRIS 313-11622	JUAN YE LAI::IRGC 61825-1::[IRIS 313-11622]	IRGC 127467	ind1A		sd1	SNPseek				C	G	C	A	A	G	G	G	T	G		C	A	A	G	C	T	C	A	G	C	G		C	A	T	C				G	G	G	A	T	C	C		A
HAP4b	IRIS 313-11635	GAM PERNG::IRGC 62135-1::[IRIS 313-11635]	IRGC 128294	ind3			SNPseek				C	G	C	A	A	G	G	G	T	G		C	A	A	G	C	T	C	A	G	C	G		C	A	T	C				G	G	G	A	T	C	C		A
HAP4b	IRIS 313-11609	MAE HAWM::IRGC 61283-1::[IRIS 313-11609]	IRGC 127587	ind3			SNPseek				C	G	C	A	A	G	G	G	T	G		C	A	A	G	C	T	C	A	G	C	G		C	A	T	C				G	G	G	A	T	C	C		A
HAP4b	IRIS 313-11648	NCS 830::IRGC 62518-1::[IRIS 313-11648]	IRGC 127667	ind2			SNPseek				C	G	C	A	A	G	G	G	T	G		C	A	A	G	C	T	C	A	G	C	G		C	A	T	C				G	G	G	A	T	C	C		A
HAP4b	IRIS 313-11657	EX WUKARI (WILD)::IRGC 63214-1::[IRIS 313-11657]		ind2			SNPseek				C	G	C	A	A	G	G	G	T	G		C	A	A	G	C	T	C	A	G	C	G		C	A	T	C				G	G	G	A	T	C	C		A
HAP4b	IRIS 313-11664	CUN GU NUO::IRGC 63576-1::[IRIS 313-11664]	IRGC 127288	indx			SNPseek				C	G	C	A	A	G	G	G	T	G		C	A	A	G	C	T	C	A	G	C	G		C	A	T	C				G	G	G	A	T	C	C		A
HAP4b	IRIS 313-11665	JIN HUA 258::IRGC 63670-1::[IRIS 313-11665]	IRGC 127464	ind1A			SNPseek				C	G	C	A	A	G	G	G	T	G		C	A	A	G	C	T	C	A	G	C	G		C	A	T	C				G	G	G	A	T	C	C		A
HAP4b	IRIS 313-11668	RONG DAO 4::IRGC 63820-1::[IRIS 313-11668]	IRGC 127771	ind1A			SNPseek				C	G	C	A	A	G	G	G	T	G		C	A	A	G	C	T	C	A	G	C	G		C	A	T	C				G	G	G	A	T	C	C		A
HAP4b	IRIS 313-11676	E MOOM::IRGC 64291-1::[IRIS 313-11676]	IRGC 127359	ind3			SNPseek				C	G	C	A	A		G	G	T	G		C	A	A	G	C	T	C	A	G	C	G		C	A	T	C				G	G	G	A	T	C	C		A
HAP4b	IRIS 313-11681	KHAO' PAWM::IRGC 64416-2::[IRIS 313-11681]	IRGC 132426	ind3			SNPseek				C	G	C	A	A	G	G	G	T	G		C	A	A	G	C	T	C	A	G	C	G		C	A	T	C				G	G	G	A	T	C	C		A
HAP4b	IRIS 313-11685	PLAWNG SAENG::IRGC 64595-1::[IRIS 313-11685]	IRGC 127735	ind3			SNPseek				C	G	C	A	A	G	G	G	T	G		C	A	A	G	C	T	C	A	G	C	G		C	A	T	C				G	G	G	A	T	C	C		A
HAP4b	IRIS 313-11686	QUAHNG LUANG::IRGC 64609-2::[IRIS 313-11686]	IRGC 132366	ind3			SNPseek				C	G	C	A	A	G	G	G	T	G		C	A	A	G	C	T	C	A	G	C	G		C	A	T	C				G	G	G	A	T	C	C		A
HAP4b	IRIS 313-11693	CHING CH'UNG::IRGC 65002-1::[IRIS 313-11693]	IRGC 127278	indx			SNPseek				C	G	C	A	A	G	G	G	T	G		C	A	A	G	C	T	C	A	G	C	G		C	A	T	C				G	G	G	A	T	C	C		A
HAP4b	IRIS 313-11711	RAI MAHK MEUANG::IRGC 66154-1::[IRIS 313-11711]	IRGC 132295	ind3			SNPseek				C	G	C	A	A	G	G	G	T	G		C	A	A	G	C	T	C	A	G	C	G		C	A	T	C				G	G	G	A	T	C	C		A
HAP4b	IRIS 313-11700	DAW NOK KAEN::IRGC 65548-1::[IRIS 313-11700]	IRGC 127306	ind3			SNPseek				C	G	C	A	A	G	G	G	T	G		C	A	A	G	C	T	C	A	G	C	G		C	A	T	C				G	G	G	A	T	C	C		A
HAP4b	IRIS 313-11719	DAWK PUT::IRGC 66699-1::[IRIS 313-11719]	IRGC 127304	ind3			SNPseek				C	G	C	A	A	G	G	G	T	G		C	A	A	G	C	T	C	A	G	C	G		C	A	T	C				G	G	G	A	T	C	C		A
HAP4b	IRIS 313-11723	DISSIGBE::IRGC 66916-1::[IRIS 313-11723]	IRGC 127320	ind2			SNPseek				C	G	C	A	A	G	G	G	T	G		C	A	A	G	C	T	C	A	G	C	G		C	A	T	C				G	G	G	A	T	C	C		A
HAP4b	IRIS 313-11726	GUANG QING 334::IRGC 67132-1::[IRIS 313-11726]	IRGC 127393	ind1A		sd1	SNPseek				C	G	C	A	A	G	G	G	T	G		C	A	A	G	C	T	C	A	G	C	G		C	A	T	C				G	G	G	A	T	C	C		A
HAP4b	IRIS 313-11737	CHUNDI::IRGC 67486-1::[IRIS 313-11737]	IRGC 127283	aus			SNPseek				C	G	C	A	A	G	G	G	T	G		C	A	A	G	C	T	C	A	G	C	G		C	A	T	C				G	G	G	A	T	C	C		A
HAP4b	IRIS 313-11753	XIANG CHANG ZAO::IRGC 68268-1::[IRIS 313-11753]	IRGC 127894	ind1A			SNPseek				C	G	C	A	A	G	G	G	T	G		C	A	A	G	C	T	C	A	G	C	G		C	A	T	C				G	G	G	A	T	C	C		A
HAP4b	IRIS 313-11757	BORIZINA 640::IRGC 68382-1::[IRIS 313-11757]	IRGC 131972	ind3			SNPseek				C	G	C	A	A	G	G	G	T	G		C	A	A	G	C	T	C	A	G	C	G		C	A	T	C				G	G	G	A	T	C	C		A
HAP4b	IRIS 313-11704	BAHN DAENG::IRGC 65771-1::[IRIS 313-11704]		ind3			SNPseek				C	G	C	A	A	G	G	G	T	G		C	A	A	G	C	T	C	A	G	C	G		C	A	T	C				G	G	G	A	T	C	C		A
HAP4b	IRIS 313-11761	NS 199::IRGC 68864-1::[IRIS 313-11761]	IRGC 127683	ind2			SNPseek				C	G	C	A	A	G	G	G	T	G		C	A	A	G	C	T	C	A	G	C	G		C	A	T	C				G	G	G	A	T	C	C		A
HAP4b	IRIS 313-11706	KHAO' NOK 4::IRGC 65932-1::[IRIS 313-11706]	IRGC 132001	ind3			SNPseek				C	G	C	A	A	G	G	G	T	G		C	A	A	G	C	T	C	A	G	C	G		C	A	T	C				G	G	G	A	T	C	C		A
HAP4b	IRIS 313-11780	KILOMBERO::IRGC 69698-1::[IRIS 313-11780]	IRGC 127524	ind3			SNPseek				C	G	C	A	A	G	G	G	T	G		C	A	A	G	C	T	C	A	G	C	G		C	A	T	C				G	G	G	A	T	C	C		A
HAP4b	IRIS 313-11785	MOSHI::IRGC 69737-1::[IRIS 313-11785]	IRGC 127631	ind3			SNPseek				C	G	C	A	A	G	G	G	T	G		C	A	A	G	C	T	C	A	G	C	G		C	A	T	C				G	G	G	A	T	C	C		A
HAP4b	IRIS 313-11819	PADINTHUMA::IRGC 70762-2::[IRIS 313-11819]	IRGC 132362	ind3			SNPseek				C	G	C	A	A	G	G	G	T	G		C	A	A	G	C	T	C	A	G	C	G		C	A	T	C				G	G	G	A	T	C	C		A
HAP4b	IRIS 313-11820	PAKISTANHMWE::IRGC 70763-1::[IRIS 313-11820]	IRGC 127709	ind3			SNPseek				C	G	C	A	A	G	G	G	T	G		C	A	A	G	C	T	C	A	G	C	G		C	A	T	C				G	G	G	A	T	C	C		A
HAP4b	IRIS 313-11794	TSIPALA MENAHAR::IRGC 69979-1::[IRIS 313-11794]	IRGC 127867	ind2			SNPseek				C	G	C	A	A	G	G	G	T	G		C	A	A	G	C	T	C	A	G	C	G		C	A	T	C				G	G	G	A	T	C	C		A
HAP4b	IRIS 313-11840	NIAW NAHK KRAD::IRGC 71352-1::[IRIS 313-11840]	IRGC 132412	ind3			SNPseek				C	G	C	A	A	G	G	G	T	G		C	A	A	G	C	T	C	A	G	C	G		C	A	T	C				G	G	G	A	T	C	C		A
HAP4b	IRIS 313-11842	NIAW YUANG KHANUN::IRGC 71362-1::[IRIS 313-11842]		ind3			SNPseek				C	G	C	A	A	G	G	G	T	G		C	A	A	G	C	T	C	A	G	C	G		C	A	T	C				G	G	G	A	T	C	C		A
HAP4b	IRIS 313-11850	SESAT JADI::IRGC 71834-1::[IRIS 313-11850]	IRGC 132041	ind3			SNPseek				C	G	C	A	A	G	G	G	T	G		C	A	A	G	C	T	C	A	G	C	G		C	A	T	C				G	G	G	A	T	C	C		A
HAP4b	IRIS 313-11856	DA HEI GU::IRGC 72009-1::[IRIS 313-11856]	IRGC 127293	ind1A			SNPseek				C	G	C	A	A	G	G	G	T	G		C	A	A	G	C	T		A	G	C	G		C	A	T	C				G	G	G	A	T	C	C		A
HAP4b	IRIS 313-11859	DONG DU::IRGC 72037-1::[IRIS 313-11859]	IRGC 127339	ind1A			SNPseek				C	G	C	A	A	G	G	G	T	G		C	A	A	G	C	T	C	A	G	C	G		C	A	T	C				G	G	G	A	T	C	C		A
HAP4b	IRIS 313-11863	HONG DU BAI::IRGC 72098-1::[IRIS 313-11863]	IRGC 127413	ind1A			SNPseek				C	G	C	A	A	G	G	G	T	G		C	A	A	G	C	T	C	A	G	C	G		C	A	T	C				G	G	G	A	T	C	C		A
HAP4b	IRIS 313-11871	SAN ZHAO QI::IRGC 72289-1::[IRIS 313-11871]	IRGC 127787	ind1A			SNPseek				C	G	C	A	A	G	G	G	T	G		C	A	A	G	C	T	C	A	G	C	G		C	A	T	C				G	G	G	A	T	C	C		A
HAP4b	IRIS 313-11872	TIE ZHONG::IRGC 72321-1::[IRIS 313-11872]	IRGC 127858	ind1A			SNPseek				C	G	C	A	A	G	G	G	T	G		C	A	A	G	C	T	C	A	G	C	G		C	A	T	C				G	G	G	A	T	C	C		A
HAP4b	IRIS 313-11878	BAI RI XIAN::IRGC 72588-1::[IRIS 313-11878]	IRGC 127203	ind1A			SNPseek				C	G	C	A	A	G	G	G	T	G		C	A	A	G	C	T	C	A	G	C	G		C	A	T	C				G	G	G	A	T	C	C		A
HAP4b	IRIS 313-11902	CEMPO TURI::IRGC 73667-1::[IRIS 313-11902]	IRGC 127251	ind3			SNPseek				C	G	C	A	A	G	G	G	T	G		C	A	A	G	C	T	C	A	G	C	G		C	A	T	C				G	G	G	A	T	C	C		A
HAP4b	IRIS 313-11905	PAYO TINGGI::IRGC 73778-1::[IRIS 313-11905]	IRGC 132414	ind3			SNPseek				C	G	C	A	A	G	G	G	T	G		C	A	A	G	C	T	C	A	G	C	G		C	A	T	C				G	G	G	A	T	C	C		A
HAP4b	IRIS 313-11912	ESCONDE CACHO::IRGC 74305-1::[IRIS 313-11912]	IRGC 127361	ind3			SNPseek				C	G	C	A	A	G	G	G	T	G		C	A	A	G	C	T	C	A	G	C	G		C	A	T	C				G	G	G	A	T	C	C		A
HAP4b	IRIS 313-11887	IR 19058-107-1::IRGC 72997-1::[IRIS 313-11887]	IRGC 127434	ind1B		sd1	SNPseek				C	G	C	A	A	G	G	G	T	G		C	A	A	G	C	T	C	A	G	C	G		C	A	T	C				G	G	G	A	T	C	C		A
HAP4b	IRIS 313-11914	IB 11::IRGC 74420-2::[IRIS 313-11914]	IRGC 132252	ind2			SNPseek				C	G	C	A	A	G	G	G	T	G		C	A	A	G	C	T	C	A	G	C	G		C	A	T	C				G	G	G	A	T	C	C		A
HAP4b	IRIS 313-11920	GI TAH::IRGC 74883-1::[IRIS 313-11920]	IRGC 127386	indx			SNPseek				C	G	C	A	A	G	G	G	T	G		C	A	A	G	C	T	C	A	G	C	G		C	A	T	C				G	G	G	A	T	C	C		A
HAP4b	IRIS 313-11927	YAH TOW::IRGC 75191-1::[IRIS 313-11927]	IRGC 127897	ind3			SNPseek				C	G	C	A	A	G	G	G	T	G		C	A	A	G	C	T	C	A	G	C	G		C	A	T	C				G	G	G	A	T	C	C		A
HAP4b	IRIS 313-11941	MOUI SAMBA::IRGC 75751-1::[IRIS 313-11941]	IRGC 128394	ind1B			SNPseek				C	G	C	A	A	G	G	G	T	G		C	A	A	G	C	T	C	A	G	C	G		C	A	T	C				G	G	G	A	T	C	C		A
HAP4b	IRIS 313-11945	MALIKULI::IRGC 76237-1::[IRIS 313-11945]	IRGC 127598	ind2			SNPseek				C	G	C	A	A	G	G	G	T	G		C	A	A	G	C	T	C	A	G	C	G		C	A	T	C				G	G	G	A	T	C	C		A
HAP4b	IRIS 313-11953	SAN BAO GU::IRGC 76732-1::[IRIS 313-11953]	IRGC 127783	ind1A			SNPseek				C	G	C	A	A	G	G	G	T	G		C	A	A	G	C	T	C	A	G	C	G		C	A	T	C				G	G	G	A	T	C	C		A
HAP4b	IRIS 313-11954	XIA HONG GU::IRGC 76803-1::[IRIS 313-11954]	IRGC 128504	ind1A			SNPseek				C	G	C	A	A	G	G	G	T	G		C	A	A	G	C	T	C	A	G	C	G		C	A	T	C				G	G	G	A	T	C	C		A
HAP4b	IRIS 313-11961	IN TOK::IRGC 77071-1::[IRIS 313-11961]	IRGC 127432	ind3			SNPseek				C	G	C	A	A	G	G	G	T	G		C	A	A	G	C	T	C	A	G	C	G		C	A	T	C				G	G	G	A	T	C	C		A
HAP4b	IRIS 313-11974	NKUMBAN NDINGO::IRGC 77718-1::[IRIS 313-11974]	IRGC 135575	ind3			SNPseek				C	G	C	A	A	G	G	G	T	G		C	A	A	G	C	T	C	A	G	C	G		C	A	T	C				G	G	G	A	T	C	C		A
HAP4b	IRIS 313-11990	TAISEN GLUTINOUS YU 1157::IRGC 78750-1::[IRIS 313-11990]	IRGC 127839	ind1B		sd1	SNPseek				C	G	C	A	A	G	G	G	T	G		C	A	A	G	C	T	C	A	G	C	G		C	A	T	C				G	G	G	A	T	C	C		A
HAP4b	IRIS 313-11992	CHAO LAO SOUNG::IRGC 78799-1::[IRIS 313-11992]	IRGC 127266	ind3			SNPseek				C	G	C	A	A	G	G	G	T	G		C	A	A	G	C	T	C	A	G	C	G		C	A	T	C				G	G	G	A	T	C	C		A
HAP4b	IRIS 313-11996	TUI (KIDAYAN)::IRGC 79058-1::[IRIS 313-11996]	IRGC 127869	ind3			SNPseek				C	G	C	A	A	G	G	G	T	G		C	A	A	G	C	T	C	A	G	C	G		C	A	T	C				G	G	G	A	T	C	C		A
HAP4b	IRIS 313-12006	PADI HANGIR::IRGC 79507-1::[IRIS 313-12006]	IRGC 132022	trop			SNPseek				C	G	C	A	A	G	G	G	T	G		C	A	A	G	C	T	C	A	G	C	G		C	A	T	C				G	G	G	A	T	C	C		A
HAP4b	IRIS 313-12007	JIA GEN::IRGC 79654-1::[IRIS 313-12007]	IRGC 127457	indx			SNPseek				C	G	C	A	A	G	G	G	T	G		C	A	A	G	C	T	C	A	G	C	G		C	A	T	C				G	G	G	A	T	C	C		A
HAP4b	IRIS 313-12016	EX AUBERGE::IRGC 79898-1::[IRIS 313-12016]	IRGC 135751	indx			SNPseek				C	G	C	A	A	G	G	G	T	G		C	A	A	G	C	T	C	A	G	C	G		C	A	T	C				G	G	G	A	T	C	C		A
HAP4b	IRIS 313-12027	ACEH (SELECTION)::IRGC 80233-1::[IRIS 313-12027]	IRGC 131962	ind3			SNPseek				C	G	C	A	A	G	G	G	T	G		C	A	A	G	C	T	C	A	G	C	G		C	A	T	C				G	G	G	A	T	C	C		A
HAP4b	IRIS 313-11985	LI TOU ZHAN::IRGC 78550-1::[IRIS 313-11985]	IRGC 127567	indx			SNPseek				C	G	C	A	A	G	G	G	T	G		C	A	A	G	C	T	C	A	G	C	G		C	A	T	C				G	G	G	A	T	C	C		A
HAP4b	IRIS 313-12049	MAE HANG::IRGC 81615-2::[IRIS 313-12049]	IRGC 132352	ind3			SNPseek				C	G	C	A	A	G	G	G	T	G		C	A	A	G	C	T	C	A	G	C	G		C	A	T	C				G	G	G	A	T	C	C		A
HAP4b	IRIS 313-12050	SHAN KAUK HNYIN::IRGC 81656-1::[IRIS 313-12050]	IRGC 128468	indx			SNPseek				C	G	C	A	A	G	G	G	T	G		C	A	A	G	C	T	C	A	G	C	G		C	A	T	C				G	G	G	A	T	C	C		A
HAP4b	IRIS 313-12069	PULUT MAS::IRGC 82676-1::[IRIS 313-12069]	IRGC 128438	trop			SNPseek				C	G	C	A	A	G	G	G	T	G		C	A	A	G	C	T	C	A	G	C	G		C	A	T	C				G	G	G	A	T	C	C		A
HAP4b	IRIS 313-12083	SARIN TSIPALA::IRGC 83154-1::[IRIS 313-12083]	IRGC 128460	ind2			SNPseek				C	G	C	A	A	G	G	G	T	G		C	A	A	G	C	T	C	A	G	C	G		C	A	T	C				G	G	G	A	T	C	C		A
HAP4b	IRIS 313-12096	NEANG CHEK::IRGC 83894-1::[IRIS 313-12096]	IRGC 135573	ind3			SNPseek				C	G	C	A	A	G	G	G	T	G		C	A	A	G	C	T	C	A	G	C	G		C	A	T	C				G	G	G	A	T	C	C		A
HAP4b	IRIS 313-12127	INPONG::IRGC 85524-1::[IRIS 313-12127]	IRGC 127431	ind3			SNPseek				C	G	C	A	A	G	G	G	T	G		C	A	A	G	C	T	C	A	G	C	G		C	A	T	C				G	G	G	A	T	C	C		A
HAP4b	IRIS 313-12130	KHAO PA::IRGC 85972-1::[IRIS 313-12130]	IRGC 127559	ind3			SNPseek				C	G	C	A	A	G	G	G	T	G		C	A	A	G	C	T	C	A	G	C	G		C	A	T	C				G	G	G	A	T	C	C		A
HAP4b	IRIS 313-12078	DAU NGHA THAI BINH::IRGC 82891-1::[IRIS 313-12078]	IRGC 127301	indx			SNPseek				C	G	C	A	A	G	G	G	T	G		C	A	A	G	C	T	C	A	G	C	G		C	A	T	C				G	G	G	A	T	C	C		A
HAP4b	IRIS 313-12139	MANSARA DHAN::IRGC 86940-1::[IRIS 313-12139]	IRGC 127604	aus			SNPseek				C	G	C	A	A	G	G	G	T	G		C	A	A	G	C	T	C	A	G	C	G		C	A	T	C				G	G	G	A	T	C	C		A
HAP4b	IRIS 313-12080	KA GIL::IRGC 83029-1::[IRIS 313-12080]	IRGC 127475	ind3			SNPseek				C	G	C	A	A	G	G	G	T	G		C	A	A	G	C	T	C	A	G	C	G		C	A	T	C				G	G	G	A	T	C	C		A
HAP4b	IRIS 313-12081	1146::IRGC 83068-1::[IRIS 313-12081]	IRGC 128208	ind3			SNPseek				C	G	C	A	A	G	G	G	T	G		C	A	A	G	C	T	C	A	G	C	G		C	A	T	C				G	G	G	A	T	C	C		A
HAP4b	IRIS 313-12224	NOON SOUNG::IRGC 91956-1::[IRIS 313-12224]	IRGC 127681	ind3			SNPseek				C	G	C	A	A	G	G	G	T	G		C	A	A	G	C	T	C	A	G	C	G		C	A	T	C				G	G	G	A	T	C	C		A
HAP4b	IRIS 313-12231	TOUN::IRGC 92291-2::[IRIS 313-12231]	IRGC 128192	ind3			SNPseek				C	G	C	A	A	G	G	G	T	G		C	A	A	G	C	T	C	A	G	C	G		C	A	T	C				G	G	G	A	T	C	C		A
HAP4b	IRIS 313-12240	PULUT MINYAK::IRGC 93615-1::[IRIS 313-12240]	IRGC 132294	ind3			SNPseek				C	G	C	A	A	G	G	G	T	G		C	A	A	G	C	T	C	A	G	C	G		C	A	T	C				G	G	G	A	T	C	C		A
HAP4b	IRIS 313-12290	JON JAN::IRGC 97633-1::[IRIS 313-12290]	IRGC 127466	indx			SNPseek				C	G	C	A	A	G	G	G	T	G		C	A	A	G	C	T	C	A	G	C	G		C	A	T	C				G	G	G	A	T	C	C		A
HAP4b	IRIS 313-12303	LG 9274::IRGC 98715-1::[IRIS 313-12303]	IRGC 127561	indx			SNPseek				C	G	C	A	A	G	G	G	T	G		C	A	A	G	C	T	C	A	G	C	G		C	A	T	C				G	G	G	A	T	C	C		A
HAP4b	IRIS 313-12309	SANPATONG NYAY::IRGC 99050-1::[IRIS 313-12309]	IRGC 127785	ind3			SNPseek					G	C	A	A	G	G	G	T	G		C	A	A	G	C	T	C	A	G	C	G		C	A	T	C				G	G	G	A	T	C	C		A
HAP4b	IRIS 313-12355	NASAENG::IRGC 107819-1::[IRIS 313-12355]	IRGC 127650	indx		sd1	SNPseek				C	G	C	A	A	G	G	G	T	G		C	A	A	G	C	T	C	A	G	C	G		C	A	T	C				G	G	G	A	T	C	C		A
HAP4b	IRIS 313-10428	SERAUP 50::IRGC 14-1::[IRIS 313-10428]		ind3			SNPseek				C	G	C	A	A	G	G	G	T	G		C	A	A	G	C	T	C	A	G	C	G		C	A	T	C				G	G	G	A	T	C	C		A
HAP4b	IRIS 313-10509	AMBARIKORI::IRGC 5132-1::[IRIS 313-10509]	IRGC 127120	ind3			SNPseek				C	G	C	A	A	G	G	G	T	G		C	A	A	G	C	T	C	A	G	C	G		C	A	T	C				G	G	G	A	T	C	C		A
HAP4b	IRIS 313-10515	TAICHUNG WOO GEN 2::IRGC 5525-1::[IRIS 313-10515]	IRGC 127836	ind1A			SNPseek				C	G	C	A	A	G	G	G	T	G		C	A	A	G	C	T	C	A	G	C	G		C	A	T	C				G	G	G	A	T	C	C		A
HAP4b	IRIS 313-10560	TA PAI MAUNG::IRGC 7292-1::[IRIS 313-10560]	IRGC 127848	ind1A			SNPseek				C	G	C	A	A	G	G	G	T	G		C	A	A	G	C	T		A	G	C	G		C	A	T	C				G	G	G	A	T	C	C		A
HAP4b	IRIS 313-10525	BANDANG PUTIH 680::IRGC 6133-2::[IRIS 313-10525]	IRGC 132246	ind3			SNPseek				C	G	C	A	A	G	G	G	T	G		C	A	A	G	C	T	C	A	G	C	G		C	A	T	C				G	G	G	A	T	C	C		A
HAP4b	IRIS 313-10652	CHAO PEUAK DENG::IRGC 11602-1::[IRIS 313-10652]	IRGC 127268	ind3			SNPseek				C	G	C	A	A	G	G	G	T	G		C	A	A	G	C	T	C	A	G	C	G		C	A	T	C				G	G	G	A	T	C	C		A
HAP4b	IRIS 313-10659	LONG MA::IRGC 11867-1::[IRIS 313-10659]	IRGC 127574	ind3			SNPseek				C	G	C	A	A	G	G	G	T	G		C	A	A	G	C	T	C	A	G	C	G		C	A	T	C				G	G	G	A	T	C	C		A
HAP4b	IRIS 313-10666	ARC 6218::IRGC 12255-1::[IRIS 313-10666]	IRGC 127164	indx			SNPseek				C	G	C	A	A	G	G	G	T	G		C	A	A	G	C	T	C	A	G	C	G		C	A	T	C				G	G	G	A	T	C	C		A
HAP4b	IRIS 313-10671	ARC 10581::IRGC 12514-1::[IRIS 313-10671]	IRGC 127128	indx			SNPseek				C	G	C	A	A	G	G	G	T	G		C	A	A	G	C	T	C	A	G	C	G		C	A	T	C				G	G	G	A	T	C	C		A
HAP4b	IRIS 313-10678	MAKALIOKA::IRGC 12781-2::[IRIS 313-10678]	IRGC 132353	ind2			SNPseek				C	G	C	A	A	G	G	G	T	G		C	A	A	G	C	T	C	A	G	C	G		C	A	T	C				G	G	G	A	T	C	C		A
HAP4b	IRIS 313-10680	MAK NAM::IRGC 12940-2::[IRIS 313-10680]	IRGC 132354	ind3			SNPseek				C	G	C	A	A	G	G	G	T	G		C	A	A	G	C	T	C	A	G	C	G		C	A	T	C				G	G	G	A	T	C	C		A
HAP4b	IRIS 313-10681	KHAN THAI DO::IRGC 12990-1::[IRIS 313-10681]	IRGC 128338	ind3			SNPseek				C	G	C	A	A	G	G	G	T	G		C	A	A	G	C	T	C	A	G	C	G		C	A	T	C				G	G	G	A	T	C	C		A
HAP4b	IRIS 313-10688	PADI TIMBUN::IRGC 13451-1::[IRIS 313-10688]	IRGC 135782	ind3			SNPseek				C	G	C	A	A	G	G	G	T	G		C	A	A	G	C	T	C	A	G	C	G		C	A	T	C				G	G	G	A	T	C	C		A
HAP4b	IRIS 313-10692	RANDAH SASAK::IRGC 13652-2::[IRIS 313-10692]	IRGC 132367	ind3			SNPseek				C	G	C	A	A	G	G	G	T	G		C	A	A	G	C	T	C	A	G	C	G		C	A	T	C				G	G	G	A	T	C	C		A
HAP4b	IRIS 313-10697	SIAM ER 16::IRGC 13910-2::[IRIS 313-10697]		ind3			SNPseek				C	G	C	A	A	G	G	G	T	G		C	A	A	G	C	T	C	A	G	C	G		C	A	T	C				G	G	G	A	T	C	C		A
HAP4b	IRIS 313-10698	RADIN GOI::IRGC 13969-1::[IRIS 313-10698]	IRGC 127759	ind3			SNPseek				C	G	C	A	A	G	G	G	T	G		C	A	A	G	C	T	C	A	G	C	G		C	A	T	C				G	G	G	A	T	C	C		A
HAP4b	IRIS 313-10702	JAROM EMAS::IRGC 14272-1::[IRIS 313-10702]		ind3			SNPseek				C	G	C	A	A	G	G	G	T	G		C	A	A	G	C	T	C	A	G	C	G		C	A	T	C				G	G	G	A	T	C	C		A
HAP4b	IRIS 313-10706	ANAK CHINA::IRGC 14479-1::[IRIS 313-10706]		ind3			SNPseek				C	G	C	A	A	G	G	G	T	G		C	A	A	G	C	T	C	A	G	C	G		C	A	T	C				G	G	G	A	T	C	C		A
HAP4b	IRIS 313-10707	ANAK DIDEK::IRGC 14491-1::[IRIS 313-10707]		ind3			SNPseek				C	G	C	A	A	G	G	G	T	G		C	A	A	G	C	T	C	A	G	C	G		C	A	T	C				G	G	G	A	T	C	C		A
HAP4b	IRIS 313-10725	ERNEST::IRGC 15884-2::[IRIS 313-10725]	IRGC 128518	indx			SNPseek				C	G	C	A	A	G	G	G	T	G		C	A	A	G	C	T	C	A	G	C	G		C	A	T	C				G	G	G	A	T	C	C		A
HAP4b	IRIS 313-10710	PINDE GOGO WIERIE::IRGC 14795-2::[IRIS 313-10710]	IRGC 128135	trop			SNPseek				C	G	C	A	A	G	G	G	T	G		C	A	A	G	C	T	C	A	G	C	G		C	A	T	C				G	G	G	A	T	C	C		A
HAP4b	IRIS 313-10743	SERAJU::IRGC 16565-1::[IRIS 313-10743]	IRGC 128465	trop			SNPseek				C	G	C	A	A	G	G	G	T	G		C	A	A	G	C	T	C	A	G	C	G		C	A	T	C				G	G	G	A	T	C	C		A
HAP4b	IRIS 313-10757	PEUAK NAM 43::IRGC 17129-1::[IRIS 313-10757]		ind3			SNPseek				C	G	C	A	A	G	G	G	T	G		C	A	A	G	C	T	C	A	G	C	G		C	A	T	C				G	G	G	A	T	C	C		A
HAP4b	IRIS 313-10760	ATJEH::IRGC 17174-1::[IRIS 313-10760]		ind3			SNPseek				C	G	C	A	A	G	G	G	T	G		C	A	A	G	C	T	C	A	G	C	G		C	A	T	C				G	G	G	A	T	C	C		A
HAP4b	IRIS 313-10770	GANDAMANA::IRGC 17593-2::[IRIS 313-10770]	IRGC 128042	trop			SNPseek				C	G	C	A	A	G	G	G	T	G		C	A	A	G	C	T	C	A	G	C	G		C	A	T	C				G	G	G	A	T	C	C		A
HAP4b	IRIS 313-10792	MATIANG::IRGC 18220-1::[IRIS 313-10792]	IRGC 127613	ind3			SNPseek				C	G	C	A	A	G	G	G	T	G		C	A	A	G	C	T	C	A	G	C	G		C	A	T	C				G	G	G	A	T	C	C		A
HAP4b	IRIS 313-10799	PAE ONGGA::IRGC 18418-1::[IRIS 313-10799]	IRGC 127704	trop			SNPseek				C	G	C	A	A	G	G	G	T	G		C	A	A	G	C	T	C	A	G	C	G		C	A	T	C				G	G	G	A	T	C	C		A
HAP4b	IRIS 313-10816	SIDJERO GUNDIL::IRGC 18829-2::[IRIS 313-10816]	IRGC 128164	trop			SNPseek				C	G	C	A	A	G	G	G	T	G		C	A	A	G	C	T	C	A	G	C	G		C	A	T	C				G	G	G	A	T	C	C		A
HAP4b	IRIS 313-10821	TJ PERAK::IRGC 19141-1::[IRIS 313-10821]	IRGC 127862	ind3			SNPseek				C	G	C	A	A	G	G	G	T	G		C	A	A	G	C	T	C	A	G	C	G		C	A	T	C				G	G	G	A	T	C	C		A
HAP4b	IRIS 313-10822	UNGGAS::IRGC 19176-2::[IRIS 313-10822]	IRGC 128199	ind3			SNPseek				C	G	C	A	A	G	G	G	T	G		C	A	A	G	C	T	C	A	G	C	G		C	A	T	C				G	G	G	A	T	C	C		A
HAP4b	IRIS 313-10854	ARC 10145::IRGC 20744-1::[IRIS 313-10854]	IRGC 127127	aus			SNPseek				C	G	C	A	A	G	G	G	T	G		C	A	A	G	C	T	C	A	G	C	G		C	A	T	C				G	G	G	A	T	C	C		A
HAP4b	IRIS 313-10856	ARC 10537::IRGC 20981-1::[IRIS 313-10856]	IRGC 128220	admix			SNPseek				C	G	C	A	A	G	G	G	T	G		C	A	A	G	C	T	C	A	G	C	G		C	A	T	C				G	G	G	A	T	C	C		A
HAP4b	IRIS 313-10857	ARC 10825::IRGC 21082-1::[IRIS 313-10857]	IRGC 127129	admix			SNPseek				C	G	C	A	A	G	G	G	T	G		C	A	A	G	C	T	C	A	G	C	G		C	A	T	C				G	G	G	A	T	C	C		A
HAP4b	IRIS 313-10861	ARC 11276::IRGC 21278-1::[IRIS 313-10861]	IRGC 127134	aus			SNPseek				C	G	C	A	A	G	G	G	T	G		C	A	A	G	C	T	C	A	G	C	G		C	A	T	C				G	G	G	A	T	C	C		A
HAP4b	IRIS 313-10882	ARC 12433::IRGC 22064-1::[IRIS 313-10882]	IRGC 127146	aus			SNPseek				C	G	C	A	A	G	G	G	T	G		C	A	A	G	C	T	C	A	G	C	G		C	A	T	C				G	G	G	A	T	C	C		A
HAP4b	IRIS 313-10883	ARC 12490::IRGC 22095-1::[IRIS 313-10883]	IRGC 128224	admix			SNPseek				C	G	C	A	A	G	G	G	T	G		C	A	A	G	C	T	C	A	G	C	G		C	A	T	C				G	G	G	A	T	C	C		A
HAP4b	IRIS 313-10885	ARC 12559::IRGC 22148-2::[IRIS 313-10885]	IRGC 127942	indx			SNPseek				C	G	C	A	A	G	G	G	T	G		C	A	A	G	C	T	C	A	G	C	G		C	A	T	C				G	G	G	A	T	C	C		A
HAP4b	IRIS 313-10891	ARC 12867::IRGC 22401-1::[IRIS 313-10891]	IRGC 127148	aus			SNPseek				C	G	C	A	A	G	G	G	T	G		C	A	A	G	C	T	C	A	G	C	G		C	A	T	C				G	G	G	A	T	C	C		A
HAP4b	IRIS 313-10892	ARC 12920::IRGC 22450-1::[IRIS 313-10892]	IRGC 127149	aus			SNPseek				C	G	C	A	A	G	G	G	T	G		C	A	A	G	C	T	C	A	G	C	G		C	A	T	C				G	G	G	A	T	C	C		A
[truncated: 1,088 more rows]
[truncated: 12 more columns]

## Sheet: Table S5
Table S5: Optimisation of gap percentage threshold for cleaning multiple sequence alignment of de novo assemblies of the NGR5 gene body and promoter.
Gap percentage threshold	Total number of accessions	Total number of haplotypes	No. of haplotypes having ≥ 5 accessions / No. of accessions belonging to such haplotypes	MSA length (bp)
90	438	438	0/0	8369
67	438	438	0/0	7766
50	438	438	0/0	7580
33	438	438	0/0	7213
5	438	264	8/164	6089
0	438	63	5/371	1574

## Sheet: Table S6
Table S6: Additional rice indica genome assemblies for NGR5 haplotyping. Rice indica genome assemblies available in public repository (NCBI/RG-Hub), were selected for extraction of homologs of NGR5 for haplotypes identification. The extracted sequences in FASTA formatted are provided in Suppl. Data S3.
Genome Database	Organism Name	Strain/Cultivar	NGR5 Sequence ID	BioSample	BioProject	Assembly	Level	Size(Mb)	GC%	Replicons	WGS	Scaffolds	CDS	Release Date	GenBank FTP	RefSeq FTP
NCBI Genome	Oryza sativa Indica Group	Zhenshan 97	Zhenshan97_CP056056.1	SAMN04274564	PRJNA302542	GCA_001623345.3	Complete	391.696	43.622	chromosome 1:CP056052.1; chromosome 2:CP056053.1; chromosome 3:CP056054.1; chromosome 4:CP056055.1; chromosome 5:CP056056.1; chromosome 6:CP056057.1; chromosome 7:CP056058.1; chromosome 8:CP056059.1; chromosome 9:CP056060.1; chromosome 10:CP056061.1; chromosome 11:CP056062.1; chromosome 12:CP056063.1; chloroplast Pltd:CP056064.1		13	0	2020-06-23T00:00:00Z
NCBI Genome	Oryza sativa Indica Group	Shuhui498	Shuhui498_CP018161.1	SAMN04866660	PRJNA318714	GCA_002151415.1	Chromosome	390.984	43.611	chromosome 1:CP018157.1; chromosome 2:CP018158.1; chromosome 3:CP018159.1; chromosome 4:CP018160.1; chromosome 5:CP018161.1; chromosome 6:CP018162.1; chromosome 7:CP018163.1; chromosome 8:CP018164.1; chromosome 9:CP018165.1; chromosome 10:CP018166.1; chromosome 11:CP018167.1; chromosome 12:CP018168.1; mitochondrion MT:CP018169.1; chloroplast Pltd:CP018170.1		14	0	2017-05-04T00:00:00Z
NCBI Genome	Oryza sativa	Early-season indica (Jiayu 253)	Jiayu253_CM032651.1	SAMN18613309	PRJNA719571	GCA_019137765.1	Chromosome	407.498	43.9447	chromosome 1:CM032647.1; chromosome 2:CM032648.1; chromosome 3:CM032649.1; chromosome 4:CM032650.1; chromosome 5:CM032651.1; chromosome 6:CM032652.1; chromosome 7:CM032653.1; chromosome 8:CM032654.1; chromosome 9:CM032655.1; chromosome 10:CM032656.1; chromosome 11:CM032657.1; chromosome 12:CM032658.1	JAGTXN01	89	0	2021-07-06T00:00:00Z		ftp://ftp.ncbi.nlm.nih.gov/genomes/all/GCA/019/137/765/GCA_019137765.1_ASM1913776v1
NCBI Genome	Oryza sativa	Indica variety "LIU XU::IRGC 109232-1"	IRGC109232_CM020662.1	SAMN13021815	PRJNA577228	GCA_009829375.1	Chromosome	490.155	43.6856	chromosome 1:CM020658.1; chromosome 2:CM020659.1; chromosome 3:CM020660.1; chromosome 4:CM020661.1; chromosome 5:CM020662.1; chromosome 6:CM020663.1; chromosome 7:CM020664.1; chromosome 8:CM020665.1; chromosome 9:CM020666.1; chromosome 10:CM020667.1; chromosome 11:CM020668.1; chromosome 12:CM020669.1	WGGU01	580	0	2020-01-03T00:00:00Z
NCBI Genome	Oryza sativa	9311	Os9311_CM025772.1	SAMN13829612	PRJNA644721	GCA_014636015.1	Chromosome	404.811	43.8922	chromosome 3:CM025766.1; chromosome 7:CM025767.1; chromosome 12:CM025768.1	JACJVK01	389	0	2020-09-18T00:00:00Z		ftp://ftp.ncbi.nlm.nih.gov/genomes/all/GCA/014/636/015/GCA_014636015.1_ASM1463601v1
NCBI Genome	Oryza sativa	9311	Os93-11_CM012057.1	SAMN08275276	PRJNA427873	GCA_003865215.1	Chromosome	395.354	43.6403	chromosome 1:CM012053.1; chromosome 2:CM012054.1; chromosome 3:CM012055.1; chromosome 4:CM012056.1; chromosome 5:CM012057.1; chromosome 6:CM012058.1; chromosome 7:CM012059.1; chromosome 8:CM012060.1; chromosome 9:CM012061.1; chromosome 10:CM012062.1; chromosome 11:CM012063.1; chromosome 12:CM012064.1	PKRX01	127	0	2018-12-05T00:00:00Z
NCBI Genome	Oryza sativa	IR64	IR64_CM020880.1	SAMN10564385	PRJNA509165	GCA_009914875.1	Chromosome	387.484	43.634	chromosome 1:CM020876.1; chromosome 2:CM020877.1; chromosome 3:CM020878.1; chromosome 4:CM020879.1; chromosome 5:CM020880.1; chromosome 6:CM020881.1; chromosome 7:CM020882.1; chromosome 8:CM020883.1; chromosome 9:CM020884.1; chromosome 10:CM020885.1; chromosome 11:CM020886.1; chromosome 12:CM020887.1	RWKJ01	112	0	2020-01-22T00:00:00Z
NCBI Genome	Oryza sativa	Taichung Native 1 (TN1)	Taichung_CM032097.1	SAMN16115968	PRJNA663050	GCA_018853525.1	Chromosome	409.523	43.8105	chromosome 1:CM032093.1; chromosome 2:CM032094.1; chromosome 3:CM032095.1; chromosome 4:CM032096.1; chromosome 5:CM032097.1; chromosome 6:CM032098.1; chromosome 7:CM032099.1; chromosome 8:CM032100.1; chromosome 9:CM032101.1; chromosome 10:CM032102.1; chromosome 11:CM032103.1; chromosome 12:CM032104.1	JACXSC01	103	0	2021-06-11T00:00:00Z		ftp://ftp.ncbi.nlm.nih.gov/genomes/all/GCA/018/853/525/GCA_018853525.1_TN1_rice_v1.0
NCBI Genome	Oryza sativa	indica cultivar Tetep	Tetep_CM014927.2	SAMN09694248	PRJNA482013	GCA_004348155.2	Chromosome	415.393	43.9415	chromosome 1:CM014923.1; chromosome 2:CM014924.2; chromosome 3:CM014925.2; chromosome 4:CM014926.2; chromosome 5:CM014927.2; chromosome 6:CM014928.2; chromosome 7:CM014929.2; chromosome 8:CM014930.2; chromosome 9:CM014931.2; chromosome 10:CM014932.2; chromosome 11:CM014933.2; chromosome 12:CM014934.2	QQAJ01	367	0	2019-03-13T00:00:00Z
NCBI Genome	Oryza sativa Indica Group	LARHA MUGAD::IRGC 52339 India	IRGC52339_CM020758.1	SAMN12748589	PRJNA565480	GCA_009831355.1	Chromosome	391.87	43.6143	chromosome 1:CM020754.1; chromosome 2:CM020755.1; chromosome 3:CM020756.1; chromosome 4:CM020757.1; chromosome 5:CM020758.1; chromosome 6:CM020759.1; chromosome 7:CM020760.1; chromosome 8:CM020761.1; chromosome 9:CM020762.1; chromosome 10:CM020763.1; chromosome 11:CM020764.1; chromosome 12:CM020765.1	VYIE01	46	0	2020-01-03T00:00:00Z
NCBI Genome	Oryza sativa Indica Group	GOBOL SAIL (BALAM)::IRGC 26624 BGD	IRGC26624_CM020674.1	SAMN12721963	PRJNA564763	GCA_009831025.1	Chromosome	392.847	43.6492	chromosome 1:CM020670.1; chromosome 2:CM020671.1; chromosome 3:CM020672.1; chromosome 4:CM020673.1; chromosome 5:CM020674.1; chromosome 6:CM020675.1; chromosome 7:CM020676.1; chromosome 8:CM020677.1; chromosome 9:CM020678.1; chromosome 10:CM020679.1; chromosome 11:CM020680.1; chromosome 12:CM020681.1	VXJI01	28	0	2020-01-03T00:00:00Z
NCBI Genome	Oryza sativa Indica Group	LIMA::IRGC 81487 Indonesia	IRGC81487_CM020650.1	SAMN12715984	PRJNA564572	GCA_009829395.1	Chromosome	405.399	43.6544	chromosome 1:CM020646.1; chromosome 2:CM020647.1; chromosome 3:CM020648.1; chromosome 4:CM020649.1; chromosome 5:CM020650.1; chromosome 6:CM020651.1; chromosome 7:CM020652.1; chromosome 8:CM020653.1; chromosome 9:CM020654.1; chromosome 10:CM020655.1; chromosome 11:CM020656.1; chromosome 12:CM020657.1	VXJH01	98	0	2020-01-03T00:00:00Z
NCBI Genome	Oryza sativa Indica Group	Minghui 63	Minghui63_CM003926.2	SAMN04274565	PRJNA302543	GCA_001623365.2	Chromosome	387.424	43.6064	chromosome 1:CM003922.2; chromosome 2:CM003923.2; chromosome 3:CM003924.2; chromosome 4:CM003925.2; chromosome 5:CM003926.2; chromosome 6:CM003927.2; chromosome 7:CM003928.2; chromosome 8:CM003929.2; chromosome 9:CM003930.2; chromosome 10:CM003931.2; chromosome 11:CM003932.2; chromosome 12:CM003933.2	LNNK02	19	0	2016-04-18T00:00:00Z
NCBI Genome	Oryza sativa Indica Group	PR 106::IRGC 53418 India	IRGC53418_CM020686.1	SAMN12672924	PRJNA563359	GCA_009831045.1	Chromosome	394.602	43.6462	chromosome 1:CM020682.1; chromosome 2:CM020683.1; chromosome 3:CM020684.1; chromosome 4:CM020685.1; chromosome 5:CM020686.1; chromosome 6:CM020687.1; chromosome 7:CM020688.1; chromosome 8:CM020689.1; chromosome 9:CM020690.1; chromosome 10:CM020691.1; chromosome 11:CM020692.1; chromosome 12:CM020693.1	VYIB01	44	0	2020-01-03T00:00:00Z
NCBI Genome	Oryza sativa Indica Group	KHAO YAI GUANG::IRGC 65972 Thai	IRGC65972_CM020722.1	SAMN12748590	PRJNA565481	GCA_009831295.1	Chromosome	399.249	43.6731	chromosome 1:CM020718.1; chromosome 2:CM020719.1; chromosome 3:CM020720.1; chromosome 4:CM020721.1; chromosome 5:CM020722.1; chromosome 6:CM020723.1; chromosome 7:CM020724.1; chromosome 8:CM020725.1; chromosome 9:CM020726.1; chromosome 10:CM020727.1; chromosome 11:CM020728.1; chromosome 12:CM020729.1	VYIF01	53	0	2020-01-03T00:00:00Z
NCBI Genome	Oryza sativa Indica Group	PA64s China (fragmented ALN)	PA64s_CM033262.1	SAMN13856353	PRJNA208877	GCA_019338905.1	Chromosome	378.288	43.4396	chromosome 1:CM033258.1; chromosome 2:CM033259.1; chromosome 3:CM033260.1; chromosome 4:CM033261.1; chromosome 5:CM033262.1; chromosome 6:CM033263.1; chromosome 7:CM033264.1; chromosome 8:CM033265.1; chromosome 9:CM033266.1; chromosome 10:CM033267.1; chromosome 11:CM033268.1; chromosome 12:CM033269.1	AVAD01	4480	0	2021-07-19T00:00:00Z		ftp://ftp.ncbi.nlm.nih.gov/genomes/all/GCA/019/338/905/GCA_019338905.1_ASM1933890v1
NCBI Genome	Oryza sativa Indica Group	93-11	Os93-11Ref	SAMN02953581	PRJNA361	GCA_000004655.2	Chromosome	426.337	43.7299	chromosome 1:CM000126.1; chromosome 2:CM000127.1; chromosome 3:CM000128.1; chromosome 4:CM000129.1; chromosome 5:CM000130.1; chromosome 6:CM000131.1; chromosome 7:CM000132.1; chromosome 8:CM000133.1; chromosome 9:CM000134.1; chromosome 10:CM000135.2; chromosome 11:CM000136.1; chromosome 12:CM000137.1	AAAA02	10627	37358	2002-04-04T00:00:00Z		ftp://ftp.ncbi.nlm.nih.gov/genomes/all/GCA/000/004/655/GCA_000004655.2_ASM465v1
NCBI Genome	Oryza sativa Indica Group	R99 china	R99_QWGD01000082.1	SAMN09867707	PRJNA486237	GCA_003449045.1	Contig	388.772	43.6		QWGD01	410	0	2018-09-04T00:00:00Z
NCBI Genome	Oryza sativa Indica Group	Co39	OsCo39_LQHE01023860.1	SAMN04275173	PRJNA305604	GCA_001611235.1	Scaffold	352.227	41.8		LQHE01	116212	0	2016-04-05T00:00:00Z
Rice Genome Hub (RG-Hub)	Oryza sativa subsp. indica	cv. IR 8	OsIR8_05G0160300
Rice Genome Hub (RG-Hub)	Oryza sativa subsp. indica	cv. Zhenshan 97	OsZS97_05G0299400
Rice Genome Hub (RG-Hub)	Oryza sativa subsp. indica	cv. Shuhui498	OsR498_G0510759900.01
Rice Genome Hub (RG-Hub)	Oryza sativa subsp. indica	cv. Minghui 63	OsMH63_05G0288800
Ensembl-Plants	Oryza sativa subsp. indica	IR64	IR64_ch5_13532575_13540090

## Sheet: Table S7
Table S7. Two-way ANOVA of relative NGR5 expression (2-ΔCt) across haplotypes and nitrogen treatments
Description: Two-way ANOVA showing the effects of NGR5 haplotype, nitrogen treatment, and their interaction on relative NGR5 expression levels across the complete dataset.
	sum_sq	df	F	PR(>F)
C(NGR5_Haplotype)	0.110053	9	3.76376	0.000721966
C(Treatment)	0.0198374	2	3.05293	0.0539412
C(NGR5_Haplotype):C(Treatment)	0.103256	18	1.76566	0.0494361
Residual	0.214428	66

## Sheet: Table S8
Table S8. Ranking of NGR5 haplotypes based on relative expression levels
Description: Haplotype-wise ranking of NGR5 expression across all nitrogen treatments based on mean relative expression values and variability.
	N0				N50				N100
Rank	Haplotype	Mean expression	SD	% CV	Haplotype	Mean expression	SD	% CV	Haplotype	Mean expression	SD	% CV
1	HAP4b	0.313197	0.20079	64.1098	HAP2	0.182828	0.0429176	23.4744	HAP2	0.116866	0.0327718	28.0421
2	HAP2	0.175361	0.0808195	46.0874	HAP3a	0.178412	0.134891	75.6067	HAP4b	0.0968168	0.0486252	50.224
3	HAP1a	0.139331	0.0820738	58.9055	HAP1a	0.120105	0.0609736	50.7669	HAP5b	0.0933253	0.00333059	3.56879
4	HAP1b	0.100262	0.0676355	67.4589	HAP4b	0.111336	0.102175	91.772	HAP3a	0.0873505	0.0149998	17.1719
5	HAP3a	0.084378	0.0539266	63.9106	HAP1b	0.106147	0.0160189	15.0913	HAP3b	0.0768939	0.0111835	14.5441
6	HAP4c	0.0681909	0.0167881	24.6192	HAP5b	0.101234	0.0662041	65.397	HAP4c	0.0744096	0.0202486	27.2123
7	HAP5a	0.0563922	0.0483942	85.8171	HAP3b	0.0992654	0.034387	34.6414	HAP5a	0.0731395	0.0265452	36.294
8	HAP3b	0.0555316	0.0433976	78.1494	HAP4a	0.0815766	0.0336313	41.2266	HAP1b	0.0704118	0.0177096	25.1515
9	HAP4a	0.0497912	0.0152844	30.6971	HAP4c	0.0770634	0.0155462	20.1733	HAP4a	0.0664466	0.00855	12.8675
10	HAP5b	0.0308914	0.0131012	42.4105	HAP5a	0.0754397	0.0143038	18.9606	HAP1a	0.0656365	0.0166298	25.3363

## Sheet: Table S9
Table S9. Tukey’s HSD multiple comparison analysis under N0 condition
Description: Pairwise comparison of NGR5 haplotypes under N0 condition using Tukey’s HSD test to identify statistically significant expression differences.
group1	group2	meandiff	p-adj	lower	upper	Significant (YES/NO)
HAP3b	HAP4b	0.2577	0.0235	0.024	0.4914	YES
HAP4a	HAP4b	0.2634	0.0196	0.0297	0.4971	YES
HAP4b	HAP4c	-0.245	0.0352	-0.4787	-0.0113	YES
HAP4b	HAP5a	-0.2568	0.0242	-0.4905	-0.0231	YES
HAP4b	HAP5b	-0.2823	0.0235	-0.5383	-0.0263	YES
HAP1a	HAP1b	-0.0391	0.9995	-0.2481	0.17	NO
HAP1a	HAP2	0.036	0.9993	-0.1509	0.223	NO
HAP1a	HAP3a	-0.055	0.9932	-0.264	0.1541	NO
HAP1a	HAP3b	-0.0838	0.9069	-0.2928	0.1252	NO
HAP1a	HAP4a	-0.0895	0.8702	-0.2986	0.1195	NO
HAP1a	HAP4b	0.1739	0.2644	-0.0598	0.4076	NO
HAP1a	HAP4c	-0.0711	0.9629	-0.2802	0.1379	NO
HAP1a	HAP5a	-0.0829	0.9118	-0.292	0.1261	NO
HAP1a	HAP5b	-0.1084	0.8126	-0.3421	0.1253	NO
HAP1b	HAP2	0.0751	0.9059	-0.1119	0.2621	NO
HAP1b	HAP3a	-0.0159	1	-0.2249	0.1931	NO
HAP1b	HAP3b	-0.0447	0.9985	-0.2538	0.1643	NO
HAP1b	HAP4a	-0.0505	0.9963	-0.2595	0.1586	NO
HAP1b	HAP4b	0.2129	0.0931	-0.0208	0.4466	NO
HAP1b	HAP4c	-0.0321	0.9999	-0.2411	0.177	NO
HAP1b	HAP5a	-0.0439	0.9987	-0.2529	0.1652	NO
HAP1b	HAP5b	-0.0694	0.9844	-0.3031	0.1643	NO
HAP2	HAP3a	-0.091	0.7709	-0.2779	0.096	NO
HAP2	HAP3b	-0.1198	0.4467	-0.3068	0.0671	NO
HAP2	HAP4a	-0.1256	0.3866	-0.3125	0.0614	NO
HAP2	HAP4b	0.1378	0.4414	-0.0764	0.352	NO
HAP2	HAP4c	-0.1072	0.5901	-0.2941	0.0798	NO
HAP2	HAP5a	-0.119	0.456	-0.3059	0.068	NO
HAP2	HAP5b	-0.1445	0.3812	-0.3587	0.0697	NO
HAP3a	HAP3b	-0.0288	1	-0.2379	0.1802	NO
HAP3a	HAP4a	-0.0346	0.9998	-0.2436	0.1744	NO
HAP3a	HAP4b	0.2288	0.058	-0.0049	0.4625	NO
HAP3a	HAP4c	-0.0162	1	-0.2252	0.1928	NO
HAP3a	HAP5a	-0.028	1	-0.237	0.181	NO
HAP3a	HAP5b	-0.0535	0.9975	-0.2872	0.1802	NO
HAP3b	HAP4a	-0.0057	1	-0.2148	0.2033	NO
HAP3b	HAP4c	0.0127	1	-0.1964	0.2217	NO
HAP3b	HAP5a	0.0009	1	-0.2082	0.2099	NO
HAP3b	HAP5b	-0.0246	1	-0.2583	0.2091	NO
HAP4a	HAP4c	0.0184	1	-0.1906	0.2274	NO
HAP4a	HAP5a	0.0066	1	-0.2024	0.2156	NO
HAP4a	HAP5b	-0.0189	1	-0.2526	0.2148	NO
HAP4c	HAP5a	-0.0118	1	-0.2208	0.1972	NO
HAP4c	HAP5b	-0.0373	0.9999	-0.271	0.1964	NO
HAP5a	HAP5b	-0.0255	1	-0.2592	0.2082	NO

## Sheet: Table S10
Table S10. Tukey’s HSD multiple comparison analysis under N50 condition
Description: Pairwise comparison of NGR5 haplotypes under N50 condition using Tukey’s HSD test to identify statistically significant expression differences.
group1	group2	meandiff	p-adj	lower	upper	Significant (YES/NO)
HAP1a	HAP1b	-0.014	1	-0.1962	0.1683	NO
HAP1a	HAP2	0.0627	0.9324	-0.1003	0.2257	NO
HAP1a	HAP3a	0.0583	0.9777	-0.124	0.2406	NO
HAP1a	HAP3b	-0.0208	1	-0.1913	0.1497	NO
HAP1a	HAP4a	-0.0385	0.9989	-0.2208	0.1437	NO
HAP1a	HAP4b	-0.0088	1	-0.1793	0.1617	NO
HAP1a	HAP4c	-0.043	0.9973	-0.2253	0.1392	NO
HAP1a	HAP5a	-0.0447	0.9965	-0.2269	0.1376	NO
HAP1a	HAP5b	-0.0189	1	-0.2227	0.1849	NO
HAP1b	HAP2	0.0767	0.815	-0.0863	0.2397	NO
HAP1b	HAP3a	0.0723	0.9203	-0.11	0.2545	NO
HAP1b	HAP3b	-0.0069	1	-0.1774	0.1636	NO
HAP1b	HAP4a	-0.0246	1	-0.2068	0.1577	NO
HAP1b	HAP4b	0.0052	1	-0.1653	0.1757	NO
HAP1b	HAP4c	-0.0291	0.9999	-0.2114	0.1532	NO
HAP1b	HAP5a	-0.0307	0.9998	-0.213	0.1516	NO
HAP1b	HAP5b	-0.0049	1	-0.2087	0.1989	NO
HAP2	HAP3a	-0.0044	1	-0.1674	0.1586	NO
HAP2	HAP3b	-0.0836	0.64	-0.2333	0.0662	NO
HAP2	HAP4a	-0.1013	0.5035	-0.2643	0.0618	NO
HAP2	HAP4b	-0.0715	0.8025	-0.2212	0.0783	NO
HAP2	HAP4c	-0.1058	0.4458	-0.2688	0.0573	NO
HAP2	HAP5a	-0.1074	0.4257	-0.2704	0.0556	NO
HAP2	HAP5b	-0.0816	0.8688	-0.2684	0.1052	NO
HAP3a	HAP3b	-0.0791	0.8255	-0.2496	0.0913	NO
HAP3a	HAP4a	-0.0968	0.697	-0.2791	0.0854	NO
HAP3a	HAP4b	-0.0671	0.9236	-0.2376	0.1034	NO
HAP3a	HAP4c	-0.1013	0.6443	-0.2836	0.0809	NO
HAP3a	HAP5a	-0.103	0.625	-0.2852	0.0793	NO
HAP3a	HAP5b	-0.0772	0.9381	-0.281	0.1266	NO
HAP3b	HAP4a	-0.0177	1	-0.1882	0.1528	NO
HAP3b	HAP4b	0.0121	1	-0.1458	0.1699	NO
HAP3b	HAP4c	-0.0222	1	-0.1927	0.1483	NO
HAP3b	HAP5a	-0.0238	1	-0.1943	0.1467	NO
HAP3b	HAP5b	0.002	1	-0.1914	0.1953	NO
HAP4a	HAP4b	0.0298	0.9998	-0.1407	0.2003	NO
HAP4a	HAP4c	-0.0045	1	-0.1868	0.1778	NO
HAP4a	HAP5a	-0.0061	1	-0.1884	0.1761	NO
HAP4a	HAP5b	0.0197	1	-0.1841	0.2234	NO
HAP4b	HAP4c	-0.0343	0.9992	-0.2048	0.1362	NO
HAP4b	HAP5a	-0.0359	0.9989	-0.2064	0.1346	NO
HAP4b	HAP5b	-0.0101	1	-0.2034	0.1832	NO
HAP4c	HAP5a	-0.0016	1	-0.1839	0.1806	NO
HAP4c	HAP5b	0.0242	1	-0.1796	0.228	NO
HAP5a	HAP5b	0.0258	1	-0.178	0.2296	NO

[truncated: 15 more sheets: Table S11, Table S12, Table S13, Table S14, Table S15, Table S16, Table S17, Table S18, Table S19, Table S20, Table S21, Table S22, Table S23, Table S24, Table S25]
